# Supplementary material for: Accurate and versatile 3D segmentation of plant tissues at cellular resolution
Source: eLife. 2020 Jul 29;9:e57613. doi: 10.7554/eLife.57613 (PMC7447435; doi:10.7554/eLife.57613)
Supplement: Figure 10—source data 1. — 'Figure 10-source data 1.xlsx' contains all the measurements used to generate the plot in pane F. [file elife-57613-fig10-data1.xlsx]

## Sheet: Ox 300 sample2
	615		1.12447		827.811		3.56101		4
Label	distance	Label	lobey	Label	area	Label	growth - mapped	Label	proli - mapped		LABEL	distance	lobey	area	growth	proli	distance (relative)	growth (relative)	proli (relative)
1024	536.286	1024	1.02319	1024	101.507	1024	1.25699	1024	1		1024	536.286	1.02319	101.507	1.25699	1	87.201	35.2987	25
512	376.803	512	1.02212	512	24.9896	512	1.48594	512	2		512	376.803	1.02212	24.9896	1.48594	2	61.2688	41.728	50
256	411.154	256	1.02443	256	95.8541	256	2.1386	256	1		256	411.154	1.02443	95.8541	2.1386	1	66.8543	60.056	25
1280	322.52	1280	1.01444	1280	63.2838	1280	1.35135	1280	1		1280	322.52	1.01444	63.2838	1.35135	1	52.4423	37.9485	25
768	348.98	768	1.02039	768	59.0805	768	1.4797	768	2		768	348.98	1.02039	59.0805	1.4797	2	56.7447	41.5528	50
128	395.073	128	1.03211	128	109.119	128	1.40547	128	1		128	395.073	1.03211	109.119	1.40547	1	64.2395	39.4683	25
1152	265.897	1152	1.00818	1152	79.2256	1152	1.14008	1152	1		1152	265.897	1.00818	79.2256	1.14008	1	43.2353	32.0156	25
640	115.454	640	1.01273	640	71.0246	640	1.01211	640	1		640	115.454	1.01273	71.0246	1.01211	1	18.773	28.422	25
384	467.807	384	1.03657	384	34.2267	384	1.58143	384	3		384	467.807	1.03657	34.2267	1.58143	3	76.0662	44.4096	75
896	205.001	896	1.06516	896	153.338	896	1.19727	896	1		896	205.001	1.06516	153.338	1.19727	1	33.3335	33.6216	25
64	371.979	64	1.01375	64	65.2656	64	1.36864	64	2		64	371.979	1.01375	65.2656	1.36864	2	60.4844	38.434	50
1088	249.985	1088	1.01627	1088	70.0456	1088	1.04555	1088	1		1088	249.985	1.01627	70.0456	1.04555	1	40.648	29.3611	25
576	353.951	576	1.03083	576	49.4726	576	1.3893	576	3		576	353.951	1.03083	49.4726	1.3893	3	57.553	39.0142	75
320	8.48676	320	1.01194	320	58.826	320	2.20415	320	1		320	8.48676	1.01194	58.826	2.20415	1	1.37996	61.8968	25
832	183.252	832	1.02319	832	86.5692	832	1.19739	832	1		832	183.252	1.02319	86.5692	1.19739	1	29.7971	33.625	25
192	553.899	192	1.02183	192	161.713	192	1.51006	192	1		192	553.899	1.02183	161.713	1.51006	1	90.0649	42.4054	25
1216	340.016	1216	1.01819	1216	77.7496	1216	1.85371	1216	1		1216	340.016	1.01819	77.7496	1.85371	1	55.2872	52.0557	25
704	138.93	704	1.0159	704	58.2938	704	1.12255	704	1		704	138.93	1.0159	58.2938	1.12255	1	22.5902	31.5234	25
448	50.9748	448	1.02236	448	161.36	448	1.24077	448	1		448	50.9748	1.02236	161.36	1.24077	1	8.28859	34.8432	25
960	210.528	960	1.01175	960	53.8375	960	1.20131	960	1		960	210.528	1.01175	53.8375	1.20131	1	34.2322	33.7351	25
32	383.554	32	1.02253	32	87.0642	32	1.45422	32	1		32	383.554	1.02253	87.0642	1.45422	1	62.3665	40.8373	25
1056	306.873	1056	1.02875	1056	47.7146	1056	1.648	1056	2		1056	306.873	1.02875	47.7146	1.648	2	49.898	46.279	50
544	397.277	544	1.0149	544	74.6385	544	2.00461	544	3		544	397.277	1.0149	74.6385	2.00461	3	64.5979	56.2933	75
1312	177.281	1312	1.02864	1312	91.5877	1312	1.12694	1312	2		1312	177.281	1.02864	91.5877	1.12694	2	28.8262	31.6466	50
800	168.373	800	1.02062	800	48.4265	800	1.08598	800	1		800	168.373	1.02062	48.4265	1.08598	1	27.3777	30.4964	25
160	469.981	160	1.03402	160	68.0823	160	1.08598	160	1		160	469.981	1.03402	68.0823	1.08598	1	76.4197	30.4964	25
1184	322.365	1184	1.01305	1184	37.9367	1184	1.99454	1184	2		1184	322.365	1.01305	37.9367	1.99454	2	52.4171	56.0105	50
672	426.291	672	1.01299	672	47.501	672	1.75627	672	2		672	426.291	1.01299	47.501	1.75627	2	69.3156	49.3194	50
416	33.8569	416	1.00689	416	48.1879	416	1.05771	416	1		416	33.8569	1.00689	48.1879	1.05771	1	5.50519	29.7025	25
928	198.655	928	1.0086	928	40.8546	928	0.905114	928	1		928	198.655	1.0086	40.8546	0.905114	1	32.3016	25.4173	25
96	333.316	96	1.03595	96	43.8968	96	1.54324	96	1		96	333.316	1.03595	43.8968	1.54324	1	54.1977	43.3371	25
1120	308.617	1120	1.0199	1120	43.9897	1120	1.66036	1120	3		1120	308.617	1.0199	43.9897	1.66036	3	50.1816	46.6261	75
608	108.29	608	1.03606	608	101.784	608	1.20694	608	1		608	108.29	1.03606	101.784	1.20694	1	17.6081	33.8932	25
352	445.335	352	1.02089	352	69.7629	352	1.57465	352	1		352	445.335	1.02089	69.7629	1.57465	1	72.4122	44.2192	25
864	183.298	864	1.01087	864	72.2786	864	1.50284	864	1		864	183.298	1.01087	72.2786	1.50284	1	29.8046	42.2026	25
224	340.359	224	1.01148	224	59.3548	224	1.53043	224	1		224	340.359	1.01148	59.3548	1.53043	1	55.3429	42.9774	25
1248	357.463	1248	1.02723	1248	85.2171	1248	1.5559	1248	2		1248	357.463	1.02723	85.2171	1.5559	2	58.1241	43.6927	50
736	141.166	736	1.03745	736	55.973	736	1.52654	736	1		736	141.166	1.03745	55.973	1.52654	1	22.9538	42.8682	25
480	66.8683	480	1.02976	480	189.36	480	1.58556	480	1		480	66.8683	1.02976	189.36	1.58556	1	10.8729	44.5256	25
992	399.741	992	1.01527	992	75.7066	992	1.7879	992	1		992	399.741	1.01527	75.7066	1.7879	1	64.9985	50.2077	25
16	361.153	16	1.01041	16	41.5696	16	1.69595	16	2		16	361.153	1.01041	41.5696	1.69595	2	58.7241	47.6255	50
1040	304.504	1040	1.01357	1040	48.5178	1040	1.97866	1040	3		1040	304.504	1.01357	48.5178	1.97866	3	49.5128	55.5646	75
528	63.4674	528	1.00726	528	88.9884	528	1.52784	528	2		528	63.4674	1.00726	88.9884	1.52784	2	10.3199	42.9047	50
272	549.789	272	1.01468	272	87.7939	272	1.68296	272	1		272	549.789	1.01468	87.7939	1.68296	1	89.3966	47.2607	25
1296	348.121	1296	1.01881	1296	78.3701	1296	1.38538	1296	2		1296	348.121	1.01881	78.3701	1.38538	2	56.605	38.9041	50
784	160.98	784	1.01957	784	49.5019	784	0.977347	784	1		784	160.98	1.01957	49.5019	0.977347	1	26.1756	27.4458	25
144	424.212	144	1.01174	144	68.1352	144	1.59394	144	2		144	424.212	1.01174	68.1352	1.59394	2	68.9776	44.7609	50
1168	524.149	1168	1.03191	1168	88.4926	1168	1.78945	1168	2		1168	524.149	1.03191	88.4926	1.78945	2	85.2275	50.2512	50
656	125.025	656	1.02038	656	89.9678	656	1.1682	656	1		656	125.025	1.02038	89.9678	1.1682	1	20.3293	32.8053	25
400	439.087	400	1.01729	400	47.2534	400	1.60346	400	2		400	439.087	1.01729	47.2534	1.60346	2	71.3963	45.0282	50
912	494.79	912	1.04681	912	147.491	912	1.8276	912	1		912	494.79	1.04681	147.491	1.8276	1	80.4537	51.3225	25
1104	281.981	1104	1.01615	1104	55.296	1104	1.21657	1104	1		1104	281.981	1.01615	55.296	1.21657	1	45.8506	34.1636	25
592	98.6275	592	1.02893	592	168.48	592	1.78383	592	1		592	98.6275	1.02893	168.48	1.78383	1	16.037	50.0934	25
336	11.0154	336	1.00844	336	103.335	336	1.20395	336	1		336	11.0154	1.00844	103.335	1.20395	1	1.79112	33.8092	25
1360	0	1360	1.02823	1360	155.108	848	2.5476	848	2		848	187.445	1.02735	91.0195	2.5476	2	0	71.5415	50
848	187.445	848	1.02735	848	91.0195	208	1.99041	208	1		208	415.758	1.03849	70.2426	1.99041	1	30.4789	55.8945	25
208	415.758	208	1.03849	208	70.2426	1232	1.44997	1232	1		1232	559.38	1.03717	154.843	1.44997	1	67.6029	40.7179	25
1232	559.38	1232	1.03717	1232	154.843	720	0.80762	720	2		720	130.015	1.00995	36.37	0.80762	2	90.9561	22.6795	50
720	130.015	720	1.00995	720	36.37	464	1.0205	464	1		464	48.0633	1.01769	51.4072	1.0205	1	21.1407	28.6576	25
464	48.0633	464	1.01769	464	51.4072	976	1.48594	976	2		976	369.825	1.03517	64.6131	1.48594	2	7.81517	41.728	50
976	369.825	976	1.03517	976	64.6131	48	1.30141	48	1		48	242.907	1.01205	196.878	1.30141	1	60.1341	36.5461	25
48	242.907	48	1.01205	48	196.878	1072	1.60726	1072	3		1072	515.743	1.00511	74.1	1.60726	3	39.4971	45.1349	75
1072	515.743	1072	1.00511	1072	74.1	560	1.06234	560	1		560	83.3603	1.02773	64.5922	1.06234	1	83.8607	29.8325	25
560	83.3603	560	1.02773	560	64.5922	304	1.4818	304	2		304	437.908	1.01644	36.9511	1.4818	2	13.5545	41.6118	50
304	437.908	304	1.01644	304	36.9511	1328	1.4818	1328	2		1328	#N/A	#N/A	#N/A	1.4818	2	71.2046	41.6118	50
816	180.965	816	1.05348	816	176.738	816	1.45834	816	1		816	180.965	1.05348	176.738	1.45834	1	29.4252	40.953	25
176	413.775	176	1.02273	176	70.6343	176	1.41196	176	1		176	413.775	1.02273	70.6343	1.41196	1	67.2805	39.6505	25
1200	330.831	1200	1.02568	1200	112.073	1200	1.59433	1200	1		1200	330.831	1.02568	112.073	1.59433	1	53.7937	44.7718	25
688	404.313	688	1.01501	688	55.1793	688	2.00461	688	3		688	404.313	1.01501	55.1793	2.00461	3	65.742	56.2933	75
432	47.5931	432	1.02826	432	157.544	432	1.27557	432	1		432	47.5931	1.02826	157.544	1.27557	1	7.73872	35.8205	25
944	207.819	944	1.01865	944	76.1661	944	1.44507	944	1		944	207.819	1.01865	76.1661	1.44507	1	33.7917	40.5803	25
112	582.583	112	1.01382	112	200.204	112	1.50536	112	1		112	582.583	1.01382	200.204	1.50536	1	94.7289	42.2734	25
1136	375.573	1136	1.05381	1136	62.478	1136	1.77115	1136	1		1136	375.573	1.05381	62.478	1.77115	1	61.0688	49.7373	25
624	96.2887	624	1.0089	624	61.804	624	1.17749	624	1		624	96.2887	1.0089	61.804	1.17749	1	15.6567	33.0662	25
368	23.2288	368	1.01929	368	60.3524	368	1.19786	368	1		368	23.2288	1.01929	60.3524	1.19786	1	3.77704	33.6382	25
880	199.042	880	1.02009	880	75.1292	880	2.14573	880	4		880	199.042	1.02009	75.1292	2.14573	4	32.3646	60.2562	100
240	538.724	240	1.0169	240	77.7918	240	1.52004	240	1		240	538.724	1.0169	77.7918	1.52004	1	87.5974	42.6856	25
1264	365.769	1264	1.01011	1264	66.5118	1264	1.5559	1264	2		1264	365.769	1.01011	66.5118	1.5559	2	59.4746	43.6927	50
752	355.757	752	1.02437	752	41.0896	752	1.23439	752	2		752	355.757	1.02437	41.0896	1.23439	2	57.8467	34.664	50
496	57.9452	496	1.01483	496	44.9031	496	1.03085	496	1		496	57.9452	1.01483	44.9031	1.03085	1	9.42198	28.9482	25
1008	558.32	1008	1.0104	1008	73.2443	1008	1.61134	1008	2		1008	558.32	1.0104	73.2443	1.61134	2	90.7837	45.2495	50
8	323.253	8	1.02226	8	100.507	8	1.22817	8	1		8	323.253	1.02226	100.507	1.22817	1	52.5615	34.4894	25
1032	236.377	1032	1.01474	1032	134.182	1032	1.25505	1032	1		1032	236.377	1.01474	134.182	1.25505	1	38.4353	35.2442	25
520	68.7915	520	1.00984	520	70.3886	520	1.2067	520	1		520	68.7915	1.00984	70.3886	1.2067	1	11.1856	33.8865	25
264	430	264	1.0155	264	76.4114	264	1.62746	264	2		264	430	1.0155	76.4114	1.62746	2	69.9187	45.7022	50
1288	390.608	1288	1.00529	1288	22.086	1288	1.80559	1288	3		1288	390.608	1.00529	22.086	1.80559	3	63.5135	50.7044	75
776	156.692	776	1.02094	776	114.539	776	1.16938	776	1		776	156.692	1.02094	114.539	1.16938	1	25.4784	32.8384	25
136	435.89	136	1.02548	136	153.038	136	1.72501	136	1		136	435.89	1.02548	153.038	1.72501	1	70.8764	48.4416	25
1160	322.224	1160	1.02801	1160	132.087	1160	1.83422	1160	1		1160	322.224	1.02801	132.087	1.83422	1	52.3941	51.5084	25
648	126.678	648	1.03165	648	241.593	648	1.55638	648	1		648	126.678	1.03165	241.593	1.55638	1	20.598	43.7061	25
392	453.656	392	1.01596	392	102.44	392	1.80184	392	1		392	453.656	1.01596	102.44	1.80184	1	73.7652	50.5991	25
904	205.932	904	1.01691	904	73.8521	904	2.14573	904	4		904	205.932	1.01691	73.8521	2.14573	4	33.4849	60.2562	100
72	431.89	72	1.05026	72	31.6128	72	1.48036	72	1		72	431.89	1.05026	31.6128	1.48036	1	70.226	41.5714	25
1096	323.319	1096	1.01511	1096	31.1046	1096	1.82957	1096	2		1096	323.319	1.01511	31.1046	1.82957	2	52.5722	51.3778	50
584	89.5375	584	1.0158	584	65.2832	584	1.44086	584	1		584	89.5375	1.0158	65.2832	1.44086	1	14.5589	40.4621	25
328	453.861	328	1.03741	328	28.7174	328	1.44572	328	2		328	453.861	1.03741	28.7174	1.44572	2	73.7985	40.5986	50
1352	509.274	1352	1.04612	1352	49.1974	1352	1.6806	1352	1		1352	509.274	1.04612	49.1974	1.6806	1	82.8088	47.1945	25
840	192.499	840	1.04181	840	108.268	840	2.31624	840	4		840	192.499	1.04181	108.268	2.31624	4	31.3007	65.0445	100
200	347.689	200	1.02491	200	102.133	200	1.62192	200	1		200	347.689	1.02491	102.133	1.62192	1	56.5348	45.5466	25
1224	284.759	1224	1.02061	1224	188.784	1224	1.12317	1224	1		1224	284.759	1.02061	188.784	1.12317	1	46.3023	31.5408	25
712	491.3	712	1.03181	712	216.891	712	1.46076	712	1		712	491.3	1.03181	216.891	1.46076	1	79.8862	41.0209	25
456	444.874	456	1.00323	456	49.3967	456	1.60346	456	2		456	444.874	1.00323	49.3967	1.60346	2	72.3372	45.0282	50
968	217.749	968	1.02824	968	76.3988	968	1.10735	968	1		968	217.749	1.02824	76.3988	1.10735	1	35.4063	31.0965	25
40	609.946	40	1.06029	40	827.811	40	1.10735	40	1		40	609.946	1.06029	827.811	1.10735	1	99.1782	31.0965	25
1064	258.686	1064	1.02309	1064	49.2524	1064	1.15979	1064	2		1064	258.686	1.02309	49.2524	1.15979	2	42.0628	32.5691	50
552	70.4657	552	1.01351	552	122.802	552	2.85473	552	2		552	70.4657	1.01351	122.802	2.85473	2	11.4578	80.1663	50
296	360.188	296	1.0317	296	81.9624	296	1.49964	296	1		296	360.188	1.0317	81.9624	1.49964	1	58.5672	42.1128	25
1320	389.687	1320	1.02093	1320	74.4988	1320	2.40376	1320	1		1320	389.687	1.02093	74.4988	2.40376	1	63.3637	67.5022	25
808	170.79	808	1.02889	808	65.8104	808	1.68964	808	2		808	170.79	1.02889	65.8104	1.68964	2	27.7707	47.4483	50
168	426.518	168	1.01454	168	96.5316	168	1.67127	168	1		168	426.518	1.01454	96.5316	1.67127	1	69.3525	46.9325	25
1192	272.042	1192	1.01724	1192	74.4402	1192	1.0163	1192	1		1192	272.042	1.01724	74.4402	1.0163	1	44.2345	28.5397	25
680	468.633	680	1.03207	680	56.9226	680	1.78797	680	2		680	468.633	1.03207	56.9226	1.78797	2	76.2005	50.2096	50
424	39.275	424	1.0199	424	82.3459	424	1.14476	424	1		424	39.275	1.0199	82.3459	1.14476	1	6.38618	32.1471	25
936	220.636	936	1.03043	936	67.8481	936	1.14476	936	1		936	220.636	1.03043	67.8481	1.14476	1	35.8758	32.1471	25
104	417.53	104	1.01293	104	64.311	104	1.59394	104	2		104	417.53	1.01293	64.311	1.59394	2	67.8911	44.7609	50
1128	271.145	1128	1.01661	1128	82.9984	1128	1.08912	1128	1		1128	271.145	1.01661	82.9984	1.08912	1	44.0886	30.5846	25
616	100.437	616	1.01057	616	49.4338	616	1.49918	616	2		616	100.437	1.01057	49.4338	1.49918	2	16.3312	42.0999	50
360	399.685	360	1.01251	360	62.0194	360	1.40339	360	1		360	399.685	1.01251	62.0194	1.40339	1	64.9894	39.4099	25
872	203.025	872	1.0338	872	88.1856	872	2.31624	872	4		872	203.025	1.0338	88.1856	2.31624	4	33.0122	65.0445	100
232	449.378	232	1.0563	232	39.3502	232	1.71476	232	2		232	449.378	1.0563	39.3502	1.71476	2	73.0696	48.1538	50
1256	298.895	1256	1.00923	1256	31.6392	1256	0.958085	1256	1		1256	298.895	1.00923	31.6392	0.958085	1	48.6008	26.9049	25
744	472.714	744	1.05049	744	238.749	744	1.49718	744	1		744	472.714	1.05049	238.749	1.49718	1	76.8641	42.0437	25
488	427.487	488	1.03422	488	99.4851	488	1.72982	488	1		488	427.487	1.03422	99.4851	1.72982	1	69.5101	48.5767	25
1000	219.014	1000	1.02714	1000	63.4187	1000	1.31616	1000	2		1000	219.014	1.02714	63.4187	1.31616	2	35.612	36.9603	50
24	395.976	24	1.02422	24	117.225	24	1.70258	24	1		24	395.976	1.02422	117.225	1.70258	1	64.3863	47.8117	25
1048	506.329	1048	1.04864	1048	111.791	1048	1.73169	1048	1		1048	506.329	1.04864	111.791	1.73169	1	82.3299	48.6292	25
536	83.9048	536	1.04171	536	127.215	536	1.0738	536	1		536	83.9048	1.04171	127.215	1.0738	1	13.6431	30.1544	25
280	390.767	280	1.00651	280	64.0158	280	1.59057	280	2		280	390.767	1.00651	64.0158	1.59057	2	63.5393	44.6663	50
1304	122.301	1304	1.05448	1304	73.9454	1304	1.73287	1304	2		1304	122.301	1.05448	73.9454	1.73287	2	19.8863	48.6623	50
792	480.699	792	1.01939	792	41.431	792	1.61309	792	2		792	480.699	1.01939	41.431	1.61309	2	78.1624	45.2987	50
152	399.674	152	1.0247	152	43.544	152	1.52973	152	2		152	399.674	1.0247	43.544	1.52973	2	64.9876	42.9578	50
1176	353.226	1176	1.03337	1176	83.1611	1176	1.96743	1176	1		1176	353.226	1.03337	83.1611	1.96743	1	57.4351	55.2492	25
664	121.93	664	1.00873	664	59.6311	664	1.07838	664	1		664	121.93	1.00873	59.6311	1.07838	1	19.826	30.283	25
408	44.5791	408	1.04242	408	202.226	408	1.0546	408	1		408	44.5791	1.04242	202.226	1.0546	1	7.24863	29.6152	25
920	354.527	920	1.01799	920	52.919	920	1.17043	920	2		920	354.527	1.01799	52.919	1.17043	2	57.6467	32.8679	50
88	425.254	88	1.01522	88	91.6876	88	1.88708	88	1		88	425.254	1.01522	91.6876	1.88708	1	69.147	52.9928	25
1112	408.718	1112	1.01716	1112	46.7709	1112	1.81455	1112	2		1112	408.718	1.01716	46.7709	1.81455	2	66.4582	50.956	50
600	88.8986	600	1.01316	600	61.9148	600	1.25087	600	2		600	88.8986	1.01316	61.9148	1.25087	2	14.4551	35.1268	50
344	13.9194	344	1.01309	344	78.8803	344	1.73583	344	1		344	13.9194	1.01309	78.8803	1.73583	1	2.26332	48.7454	25
856	384.988	856	1.04958	856	63.8234	856	1.55728	856	1		856	384.988	1.04958	63.8234	1.55728	1	62.5997	43.7314	25
216	351.186	216	1.0136	216	92.8734	216	1.70433	216	1		216	351.186	1.0136	92.8734	1.70433	1	57.1034	47.8609	25
1240	293.795	1240	1.0199	1240	95.9986	1240	1.0376	1240	1		1240	293.795	1.0199	95.9986	1.0376	1	47.7715	29.1378	25
728	479.411	728	1.00899	728	25.9765	728	1.63669	728	2		728	479.411	1.00899	25.9765	1.63669	2	77.953	45.9614	50
472	43.4323	472	1.01132	472	86.5696	472	1.34426	472	1		472	43.4323	1.01132	86.5696	1.34426	1	7.06216	37.7494	25
984	241.016	984	1.07018	984	80.4203	984	1.34426	984	1		984	241.016	1.07018	80.4203	1.34426	1	39.1896	37.7494	25
56	450.674	56	1.06797	56	38.9923	56	1.64001	56	2		56	450.674	1.06797	38.9923	1.64001	2	73.2803	46.0546	50
1080	265.042	1080	1.02834	1080	36.2949	1080	1.15979	1080	2		1080	265.042	1.02834	36.2949	1.15979	2	43.0963	32.5691	50
568	92.1678	568	1.01595	568	93.7675	568	1.21197	568	1		568	92.1678	1.01595	93.7675	1.21197	1	14.9866	34.0344	25
312	339.795	312	1.01439	312	45.1352	312	1.3841	312	1		312	339.795	1.01439	45.1352	1.3841	1	55.2512	38.8682	25
1336	288.879	1336	1.05098	1336	189.236	1336	1.16522	1336	1		1336	288.879	1.05098	189.236	1.16522	1	46.9722	32.7216	25
824	175.939	824	1.01583	824	100.315	824	1.65359	824	1		824	175.939	1.01583	100.315	1.65359	1	28.608	46.436	25
184	400.769	184	1.03305	184	59.8434	184	1.48087	184	2		184	400.769	1.03305	59.8434	1.48087	2	65.1657	41.5857	50
1208	531.252	1208	1.02189	1208	53.46	1208	1.53923	1208	2		1208	531.252	1.02189	53.46	1.53923	2	86.3824	43.2245	50
696	139.246	696	1.01054	696	65.1768	696	1.0559	696	1		696	139.246	1.01054	65.1768	1.0559	1	22.6416	29.6517	25
440	34.8219	440	1.0232	440	79.0086	440	1.11269	440	1		440	34.8219	1.0232	79.0086	1.11269	1	5.6621	31.2465	25
952	211.858	952	1.02928	952	132.757	952	1.23551	952	1		952	211.858	1.02928	132.757	1.23551	1	34.4485	34.6955	25
1144	293.886	1144	1.01669	1144	28.7088	1144	1.27967	1144	2		1144	293.886	1.01669	28.7088	1.27967	2	47.7863	35.9356	50
632	118.589	632	1.0304	632	187.208	632	1.45026	632	1		632	118.589	1.0304	187.208	1.45026	1	19.2828	40.7261	25
888	496.295	888	1.01476	888	45.6277	888	1.70894	888	3		888	496.295	1.01476	45.6277	1.70894	3	80.6984	47.9903	75
248	242.041	248	1.02457	248	74.5122	248	1.00413	248	1		248	242.041	1.02457	74.5122	1.00413	1	39.3563	28.1979	25
1272	307.282	1272	1.00573	1272	27.4815	1272	1.30869	1272	1		1272	307.282	1.00573	27.4815	1.30869	1	49.9646	36.7505	25
760	154.505	760	1.02198	760	67.6919	760	1.2853	760	1		760	154.505	1.02198	67.6919	1.2853	1	25.1228	36.0937	25
504	462.368	504	1.0082	504	97.4142	504	1.44006	504	1		504	462.368	1.0082	97.4142	1.44006	1	75.1818	40.4397	25
1016	234.2	1016	1.0114	1016	79.9901	1016	1.66197	1016	2		1016	234.2	1.0114	79.9901	1.66197	2	38.0813	46.6713	50
1028	525.067	1028	1.02797	1028	208.588	1028	1.41535	1028	1		1028	525.067	1.02797	208.588	1.41535	1	85.3767	39.7457	25
516	55.8489	516	1.01607	516	70.9992	516	1.22863	516	2		516	55.8489	1.01607	70.9992	1.22863	2	9.08112	34.5023	50
260	250.214	260	1.02352	260	188.883	260	1.18655	260	1		260	250.214	1.02352	188.883	1.18655	1	40.6852	33.3206	25
1284	386.157	1284	1.01438	1284	37.3396	1284	2.119	1284	2		1284	386.157	1.01438	37.3396	2.119	2	62.7898	59.5056	50
772	346.771	772	1.01839	772	115.631	772	1.52079	772	1		772	346.771	1.01839	115.631	1.52079	1	56.3855	42.7067	25
644	459.036	644	1.04583	644	94.6256	644	1.61021	644	1		644	459.036	1.04583	94.6256	1.61021	1	74.64	45.2178	25
388	375.328	388	1.02164	388	86.5231	388	1.59265	388	1		388	375.328	1.02164	86.5231	1.59265	1	61.0289	44.7247	25
900	367.967	900	1.01687	900	34.7875	900	1.33348	900	2		900	367.967	1.01687	34.7875	1.33348	2	59.832	37.4467	50
68	430.955	68	1.00986	68	37.5167	68	1.92859	68	1		68	430.955	1.00986	37.5167	1.92859	1	70.074	54.1585	25
1092	334.921	1092	1.01566	1092	60.6618	1092	1.46049	1092	1		1092	334.921	1.01566	60.6618	1.46049	1	54.4587	41.0134	25
580	356.409	580	1.01081	580	25.99	580	1.3893	580	3		580	356.409	1.01081	25.99	1.3893	3	57.9527	39.0142	75
836	497.965	836	1.03016	836	97.8933	836	1.4048	836	1		836	497.965	1.03016	97.8933	1.4048	1	80.9699	39.4495	25
196	371.613	196	1.0215	196	54.2682	196	1.611	196	2		196	371.613	1.0215	54.2682	1.611	2	60.4249	45.24	50
1220	300.479	1220	1.0329	1220	134.469	1220	1.38674	1220	1		1220	300.479	1.0329	134.469	1.38674	1	48.8584	38.9423	25
708	142.167	708	1.0212	708	85.2523	708	1.09686	708	1		708	142.167	1.0212	85.2523	1.09686	1	23.1166	30.8019	25
452	51.4204	452	1.03916	452	51.4301	452	0.93208	452	1		452	51.4204	1.03916	51.4301	0.93208	1	8.36104	26.1746	25
964	541.089	964	1.01784	964	45.2077	964	0.93208	964	1		964	541.089	1.01784	45.2077	0.93208	1	87.982	26.1746	25
36	384.1	36	1.01285	36	65.5248	36	1.20549	36	1		36	384.1	1.01285	65.5248	1.20549	1	62.4553	33.8525	25
1060	536.937	1060	1.03597	1060	219.695	1060	1.48143	1060	1		1060	536.937	1.03597	219.695	1.48143	1	87.3068	41.6014	25
548	83.5371	548	1.02162	548	114.407	548	1.2128	548	1		548	83.5371	1.02162	114.407	1.2128	1	13.5833	34.0578	25
292	0	292	1.01728	292	185.038	292	1.2128	292	1		292	0	1.01728	185.038	1.2128	1	0	34.0578	25
1316	292.436	1316	1.0766	1316	33.5529	1316	1.2128	1316	1		1316	292.436	1.0766	33.5529	1.2128	1	47.5506	34.0578	25
804	179.018	804	1.04722	804	170.391	804	1.27784	804	1		804	179.018	1.04722	170.391	1.27784	1	29.1086	35.8842	25
164	402.174	164	1.03134	164	94.0543	164	1.69805	164	1		164	402.174	1.03134	94.0543	1.69805	1	65.3941	47.6845	25
1188	290.349	1188	1.009	1188	87.5222	1188	1.17827	1188	1		1188	290.349	1.009	87.5222	1.17827	1	47.2112	33.0881	25
676	474.867	676	1.01899	676	43.1089	676	1.79416	676	1		676	474.867	1.01899	43.1089	1.79416	1	77.2141	50.3835	25
420	338.088	420	1.01702	420	60.3604	420	1.43968	420	1		420	338.088	1.01702	60.3604	1.43968	1	54.9737	40.429	25
932	207.142	932	1.03975	932	73.5193	932	1.0528	932	1		932	207.142	1.03975	73.5193	1.0528	1	33.6816	29.5646	25
100	313.916	100	1.02659	100	62.6918	100	1.12674	100	1		100	313.916	1.02659	62.6918	1.12674	1	51.0433	31.641	25
1124	275.663	1124	1.02709	1124	90.9721	1124	1.15473	1124	1		1124	275.663	1.02709	90.9721	1.15473	1	44.8233	32.427	25
612	99.8839	612	1.02033	612	86.083	612	1.23764	612	1		612	99.8839	1.02033	86.083	1.23764	1	16.2413	34.7553	25
356	19.8137	356	1.01286	356	158.476	356	1.48001	356	1		356	19.8137	1.01286	158.476	1.48001	1	3.22174	41.5615	25
868	184.658	868	1.01089	868	39.3783	868	0.986843	868	1		868	184.658	1.01089	39.3783	0.986843	1	30.0257	27.7124	25
228	324.143	228	1.02495	228	103.928	228	1.52264	228	1		228	324.143	1.02495	103.928	1.52264	1	52.7062	42.7587	25
1252	313.58	1252	1.01046	1252	115.665	1252	1.70515	1252	1		1252	313.58	1.01046	115.665	1.70515	1	50.9886	47.8839	25
740	476.555	740	1.03283	740	263.417	740	1.62338	740	1		740	476.555	1.03283	263.417	1.62338	1	77.4886	45.5876	25
484	59.0345	484	1.03259	484	72.7653	484	1.08795	484	1		484	59.0345	1.03259	72.7653	1.08795	1	9.59911	30.5517	25
996	231.798	996	1.01509	996	47.3925	996	2.72113	996	4		996	231.798	1.01509	47.3925	2.72113	4	37.6907	76.4146	100
20	400.475	20	1.01189	20	56.759	20	2.21788	20	1		20	400.475	1.01189	56.759	2.21788	1	65.1179	62.2823	25
1044	278.152	1044	1.0233	1044	42.1332	1044	1.54828	1044	2		1044	278.152	1.0233	42.1332	1.54828	2	45.228	43.4787	50
532	71.8799	532	1.00683	532	62.5754	532	1.13099	532	1		532	71.8799	1.00683	62.5754	1.13099	1	11.6878	31.7604	25
276	0	276	1.02927	276	187.951	276	1.13099	276	1		276	0	1.02927	187.951	1.13099	1	0	31.7604	25
1300	183.443	1300	1.03013	1300	77.9604	1300	2.31624	1300	4		1300	183.443	1.03013	77.9604	2.31624	4	29.8281	65.0445	100
788	480.29	788	1.01435	788	23.0881	788	1.62713	788	2		788	480.29	1.01435	23.0881	1.62713	2	78.0959	45.6929	50
148	417.143	148	1.01548	148	46.0379	148	1.94962	148	2		148	417.143	1.01548	46.0379	1.94962	2	67.8281	54.7491	50
1172	274.379	1172	1.02125	1172	109.664	1172	1.12503	1172	1		1172	274.379	1.02125	109.664	1.12503	1	44.6145	31.593	25
660	129.992	660	1.02914	660	147.426	660	1.11443	660	1		660	129.992	1.02914	147.426	1.11443	1	21.1369	31.2953	25
404	34.4507	404	1.01087	404	84.6095	404	1.13414	404	1		404	34.4507	1.01087	84.6095	1.13414	1	5.60174	31.8488	25
916	217.065	916	1.03172	916	94.6914	916	2.30491	916	3		916	217.065	1.03172	94.6914	2.30491	3	35.2951	64.7263	75
84	333.801	84	1.02933	84	81.8617	84	1.65508	84	2		84	333.801	1.02933	81.8617	1.65508	2	54.2766	46.4778	50
1108	255.403	1108	1.01486	1108	104.859	1108	1.20878	1108	1		1108	255.403	1.01486	104.859	1.20878	1	41.5289	33.9449	25
596	348.63	596	1.03237	596	51.1505	596	1.2878	596	1		596	348.63	1.03237	51.1505	1.2878	1	56.6878	36.1639	25
340	423.589	340	1.01009	340	49.2584	340	1.63752	340	2		340	423.589	1.01009	49.2584	1.63752	2	68.8763	45.9847	50
1364	498.893	1364	1.05648	1364	52.2665	1364	1.42326	1364	3		1364	498.893	1.05648	52.2665	1.42326	3	81.1208	39.9679	75
852	185.067	852	1.01135	852	85.9692	852	1.08325	852	1		852	185.067	1.01135	85.9692	1.08325	1	30.0922	30.4197	25
212	415.667	212	1.02402	212	45.0969	212	1.35448	212	2		212	415.667	1.02402	45.0969	1.35448	2	67.5881	38.0364	50
1236	301.979	1236	1.01457	1236	95.4865	1236	1.31496	1236	1		1236	301.979	1.01457	95.4865	1.31496	1	49.1023	36.9266	25
724	153.077	724	1.00948	724	120.534	724	1.1015	724	1		724	153.077	1.00948	120.534	1.1015	1	24.8906	30.9322	25
468	54.4114	468	1.01765	468	63.6858	468	1.36585	468	1		468	54.4114	1.01765	63.6858	1.36585	1	8.84738	38.3557	25
980	220.863	980	1.01282	980	87.7524	980	1.05551	980	1		980	220.863	1.01282	87.7524	1.05551	1	35.9127	29.6407	25
52	518.589	52	1.00955	52	74.5658	52	1.61553	52	1		52	518.589	1.00955	74.5658	1.61553	1	84.3234	45.3672	25
564	360.12	564	1.02983	564	87.1203	564	1.62725	564	1		564	360.12	1.02983	87.1203	1.62725	1	58.5561	45.6963	25
308	434.901	308	1.01459	308	36.98	308	1.62746	308	2		308	434.901	1.01459	36.98	1.62746	2	70.7156	45.7022	50
1332	386.515	1332	1.05044	1332	197.419	1332	1.62746	1332	2		1332	386.515	1.05044	197.419	1.62746	2	62.848	45.7022	50
820	428.44	820	1.04309	820	59.3979	820	1.8953	820	2		820	428.44	1.04309	59.3979	1.8953	2	69.665	53.2237	50
180	406.495	180	1.03913	180	70.0681	180	1.32845	180	1		180	406.495	1.03913	70.0681	1.32845	1	66.0967	37.3054	25
1204	286.583	1204	1.02222	1204	176.422	1204	1.19672	1204	1		1204	286.583	1.02222	176.422	1.19672	1	46.5989	33.6062	25
692	140.574	692	1.02604	692	183.825	692	1.16352	692	1		692	140.574	1.02604	183.825	1.16352	1	22.8576	32.6739	25
436	341.904	436	1.02253	436	96.0177	436	1.1776	436	1		436	341.904	1.02253	96.0177	1.1776	1	55.5941	33.0693	25
948	500.936	948	1.00277	948	17.7279	948	1.70894	948	3		948	500.936	1.00277	17.7279	1.70894	3	81.453	47.9903	75
116	416.769	116	1.02219	116	60.3848	116	1.91585	116	2		116	416.769	1.02219	60.3848	1.91585	2	67.7673	53.8007	50
1140	316.322	1140	1.02555	1140	50.8932	1140	1.66036	1140	3		1140	316.322	1.02555	50.8932	1.66036	3	51.4345	46.6261	75
372	25.7067	372	1.01192	372	52.0801	372	1.16091	372	1		372	25.7067	1.01192	52.0801	1.16091	1	4.17995	32.6006	25
884	193.63	884	1.02077	884	91.6522	884	2.4624	884	4		884	193.63	1.02077	91.6522	2.4624	4	31.4846	69.1489	100
244	307.386	244	1.01222	244	114.512	244	1.16202	244	1		244	307.386	1.01222	114.512	1.16202	1	49.9815	32.6318	25
1268	321.779	1268	1.02212	1268	63.1595	1268	1.43885	1268	2		1268	321.779	1.02212	63.1595	1.43885	2	52.3218	40.4057	50
756	151.485	756	1.01643	756	72.6026	756	1.15232	756	1		756	151.485	1.01643	72.6026	1.15232	1	24.6317	32.3594	25
500	66.376	500	1.02659	500	139.783	500	1.29021	500	1		500	66.376	1.02659	139.783	1.29021	1	10.7928	36.2316	25
1012	361.142	1012	1.03395	1012	108.412	1012	1.40654	1012	1		1012	361.142	1.03395	108.412	1.40654	1	58.7223	39.4983	25
12	410.533	12	1.01158	12	37.8647	12	1.85349	12	2		12	410.533	1.01158	37.8647	1.85349	2	66.7533	52.0496	50
1036	233.905	1036	1.03748	1036	119.853	1036	1.0982	1036	1		1036	233.905	1.03748	119.853	1.0982	1	38.0333	30.8396	25
524	72.0415	524	1.0485	524	149.388	524	1.29847	524	1		524	72.0415	1.0485	149.388	1.29847	1	11.7141	36.4635	25
268	417.046	268	1.0476	268	80.5918	268	1.62887	268	1		268	417.046	1.0476	80.5918	1.62887	1	67.8124	45.7418	25
1292	300.103	1292	1.03434	1292	44.1907	1292	1.70939	1292	2		1292	300.103	1.03434	44.1907	1.70939	2	48.7972	48.003	50
780	346.637	780	1.05242	780	104.592	780	1.25145	780	1		780	346.637	1.05242	104.592	1.25145	1	56.3637	35.1431	25
140	434.278	140	1.05193	140	76.5251	140	2.65061	140	1		140	434.278	1.05193	76.5251	2.65061	1	70.6143	74.4342	25
1164	527.494	1164	1.01578	1164	26.2198	1164	2.16265	1164	2		1164	527.494	1.01578	26.2198	2.16265	2	85.7714	60.7314	50
652	111.782	652	1.01509	652	89.2068	652	1.19176	652	1		652	111.782	1.01509	89.2068	1.19176	1	18.1759	33.4669	25
396	445.014	396	1.01255	396	69.3483	396	1.48104	396	1		396	445.014	1.01255	69.3483	1.48104	1	72.36	41.5904	25
908	194.18	908	1.00907	908	51.3628	908	1.08343	908	1		908	194.18	1.00907	51.3628	1.08343	1	31.574	30.4248	25
76	444.055	76	1.11123	76	76.2415	76	1.90028	76	2		76	444.055	1.11123	76.2415	1.90028	2	72.2041	53.3635	50
1100	555.954	1100	1.0185	1100	84.3056	1100	1.36003	1100	1		1100	555.954	1.0185	84.3056	1.36003	1	90.399	38.1923	25
588	347.501	588	1.00931	588	61.9776	588	1.4192	588	2		588	347.501	1.00931	61.9776	1.4192	2	56.5042	39.8539	50
332	419.755	332	1.0135	332	26.7956	332	1.683	332	2		332	419.755	1.0135	26.7956	1.683	2	68.2528	47.2619	50
1356	449.388	1356	1.09159	1356	42.4454	1356	1.75868	1356	2		1356	449.388	1.09159	42.4454	1.75868	2	73.0712	49.3871	50
844	389.212	844	1.01757	844	52.0718	844	1.75616	844	1		844	389.212	1.01757	52.0718	1.75616	1	63.2865	49.3163	25
204	417.21	204	1.01504	204	54.0806	204	1.63752	204	2		204	417.21	1.01504	54.0806	1.63752	2	67.839	45.9847	50
1228	458.733	1228	1.08918	1228	57.6799	1228	1.63752	1228	2		1228	458.733	1.08918	57.6799	1.63752	2	74.5907	45.9847	50
716	383.621	716	1.02604	716	35.1716	716	1.62135	716	3		716	383.621	1.02604	35.1716	1.62135	3	62.3774	45.5306	75
460	44.2079	460	1.01675	460	61.0885	460	1.14302	460	1		460	44.2079	1.01675	61.0885	1.14302	1	7.18828	32.0982	25
972	221.031	972	1.01011	972	91.2651	972	2.72113	972	4		972	221.031	1.01011	91.2651	2.72113	4	35.94	76.4146	100
44	387.701	44	1.01949	44	107.862	44	1.28341	44	1		44	387.701	1.01949	107.862	1.28341	1	63.0408	36.0406	25
1068	246.82	1068	1.03	1068	106.062	1068	1.17094	1068	1		1068	246.82	1.03	106.062	1.17094	1	40.1333	32.8822	25
556	463.462	556	1.01997	556	91.6672	556	1.87159	556	1		556	463.462	1.01997	91.6672	1.87159	1	75.3597	52.5578	25
300	350.029	300	1.04647	300	101.158	300	1.35866	300	1		300	350.029	1.04647	101.158	1.35866	1	56.9153	38.1538	25
1324	563.75	1324	1.04917	1324	166.044	1324	1.33526	1324	1		1324	563.75	1.04917	166.044	1.33526	1	91.6667	37.4967	25
812	176.465	812	1.01645	812	224.114	812	1.42308	812	1		812	176.465	1.01645	224.114	1.42308	1	28.6935	39.9628	25
172	577.674	172	1.02746	172	64.8102	172	1.57495	172	1		172	577.674	1.02746	64.8102	1.57495	1	93.9307	44.2276	25
1196	355.864	1196	1.01855	1196	43.499	1196	2.42009	1196	2		1196	355.864	1.01855	43.499	2.42009	2	57.8641	67.9608	50
684	136.26	684	1.0338	684	120.073	684	1.11708	684	1		684	136.26	1.0338	120.073	1.11708	1	22.1561	31.3698	25
428	342.053	428	1.03665	428	102.281	428	1.23887	428	1		428	342.053	1.03665	102.281	1.23887	1	55.6184	34.7898	25
940	210.341	940	1.01065	940	98.7306	940	2.39579	940	2		940	210.341	1.01065	98.7306	2.39579	2	34.2018	67.2784	50
108	328.58	108	1.05727	108	105.915	108	1.30998	108	1		108	328.58	1.05727	105.915	1.30998	1	53.4276	36.7868	25
1132	338.724	1132	1.02476	1132	72.8721	1132	2.13463	1132	1		1132	338.724	1.02476	72.8721	2.13463	1	55.0771	59.9445	25
364	10.1079	364	1.02264	364	147.857	364	1.71899	364	1		364	10.1079	1.02264	147.857	1.71899	1	1.64356	48.2725	25
876	388.251	876	1.02945	876	42.0335	876	1.54118	876	2		876	388.251	1.02945	42.0335	1.54118	2	63.1302	43.2793	50
236	313.198	236	1.0161	236	89.8658	236	1.23312	236	1		236	313.198	1.0161	89.8658	1.23312	1	50.9265	34.6284	25
1260	377.796	1260	1.04002	1260	136.782	1260	2.10179	1260	1		1260	377.796	1.04002	136.782	2.10179	1	61.4302	59.0223	25
748	157.943	748	1.03058	748	77.8142	748	0.976667	748	1		748	157.943	1.03058	77.8142	0.976667	1	25.6818	27.4267	25
492	466.37	492	1.01301	492	160.766	492	1.88471	492	1		492	466.37	1.01301	160.766	1.88471	1	75.8325	52.9263	25
1004	390.201	1004	1.01497	1004	73.1323	1004	1.72946	1004	1		1004	390.201	1.01497	73.1323	1.72946	1	63.4473	48.5666	25
1052	549.826	1052	1.02203	1052	82.6477	1052	1.28401	1052	1		1052	549.826	1.02203	82.6477	1.28401	1	89.4026	36.0575	25
540	487.118	540	1.06748	540	118.746	540	1.34442	540	1		540	487.118	1.06748	118.746	1.34442	1	79.2062	37.7539	25
1308	82.1039	1308	1.05809	1308	99.2969	1308	2.51086	1308	2		1308	82.1039	1.05809	99.2969	2.51086	2	13.3502	70.5098	50
796	169.245	796	1.03175	796	156.357	796	1.37982	796	1		796	169.245	1.03175	156.357	1.37982	1	27.5195	38.748	25
156	438.225	156	1.04132	156	102.344	156	1.57966	156	1		156	438.225	1.04132	102.344	1.57966	1	71.2561	44.3599	25
1180	337.625	1180	1.03103	1180	80.6666	1180	1.9597	1180	3		1180	337.625	1.03103	80.6666	1.9597	3	54.8984	55.0321	75
668	128.475	668	1.01462	668	153.584	668	1.2553	668	1		668	128.475	1.01462	153.584	1.2553	1	20.8902	35.2512	25
412	22.3314	412	1.0378	412	109.239	412	1.17927	412	1		412	22.3314	1.0378	109.239	1.17927	1	3.63112	33.1162	25
924	531.993	924	1.03338	924	50.2027	924	1.17927	924	1		924	531.993	1.03338	50.2027	1.17927	1	86.5029	33.1162	25
92	325.335	92	1.02056	92	74.6522	92	1.52701	92	1		92	325.335	1.02056	74.6522	1.52701	1	52.9	42.8814	25
1116	387.478	1116	1.02337	1116	27.7178	1116	1.80212	1116	3		1116	387.478	1.02337	27.7178	1.80212	3	63.0046	50.607	75
604	458.62	604	1.01329	604	75.3804	604	1.73208	604	1		604	458.62	1.01329	75.3804	1.73208	1	74.5724	48.6401	25
348	405.04	348	1.00393	348	38.0147	348	1.80919	348	3		348	405.04	1.00393	38.0147	1.80919	3	65.8602	50.8055	75
860	406.256	860	1.00983	860	50.9589	860	2.23501	860	3		860	406.256	1.00983	50.9589	2.23501	3	66.0579	62.7634	75
220	405.195	220	1.04375	220	159.809	220	1.28575	220	1		220	405.195	1.04375	159.809	1.28575	1	65.8854	36.1063	25
1244	368.892	1244	1.01231	1244	33.1907	1244	1.78556	1244	2		1244	368.892	1.01231	33.1907	1.78556	2	59.9824	50.142	50
732	476.09	732	1.02659	732	60.2667	732	1.79239	732	1		732	476.09	1.02659	60.2667	1.79239	1	77.413	50.3338	25
476	54.5234	476	1.01151	476	33.6179	476	0.804028	476	1		476	54.5234	1.01151	33.6179	0.804028	1	8.86559	22.5787	25
988	414.266	988	1.00835	988	61.445	988	1.59818	988	1		988	414.266	1.00835	61.445	1.59818	1	67.3603	44.88	25
60	451.114	60	1.03455	60	70.9639	60	1.64001	60	2		60	451.114	1.03455	70.9639	1.64001	2	73.3519	46.0546	50
1084	257.941	1084	1.02695	1084	208.852	1084	1.62966	1084	1		1084	257.941	1.02695	208.852	1.62966	1	41.9416	45.764	25
572	94.4778	572	1.01963	572	59.8959	572	1.05246	572	1		572	94.4778	1.01963	59.8959	1.05246	1	15.3622	29.5551	25
316	0	316	1.02352	316	83.7611	316	1.05246	316	1		316	0	1.02352	83.7611	1.05246	1	0	29.5551	25
1340	154.048	1340	1.02066	1340	96.6826	1340	1.14103	1340	1		1340	154.048	1.02066	96.6826	1.14103	1	25.0485	32.0423	25
828	178.055	828	1.0151	828	81.176	828	1.39946	828	1		828	178.055	1.0151	81.176	1.39946	1	28.952	39.2995	25
188	567.154	188	1.01887	188	276.33	188	1.36973	188	1		188	567.154	1.01887	276.33	1.36973	1	92.2202	38.4646	25
1212	354.37	1212	1.0166	1212	55.4165	1212	1.95779	1212	2		1212	354.37	1.0166	55.4165	1.95779	2	57.6211	54.9785	50
700	125.627	700	1.01774	700	30.241	700	0.80762	700	2		700	125.627	1.01774	30.241	0.80762	2	20.4272	22.6795	50
444	44.4846	444	1.01192	444	35.115	444	0.898318	444	1		444	44.4846	1.01192	35.115	0.898318	1	7.23327	25.2265	25
956	229.669	956	1.03877	956	183.929	956	2.30491	956	3		956	229.669	1.03877	183.929	2.30491	3	37.3446	64.7263	75
124	396.361	124	1.02914	124	73.8913	124	1.2914	124	1		124	396.361	1.02914	73.8913	1.2914	1	64.4489	36.265	25
1148	279.804	1148	1.02746	1148	94.2157	1148	1.15305	1148	1		1148	279.804	1.02746	94.2157	1.15305	1	45.4966	32.3799	25
636	468.126	636	1.00759	636	109.174	636	1.69699	636	1		636	468.126	1.00759	109.174	1.69699	1	76.118	47.6547	25
380	25.0398	380	1.02045	380	58.5125	380	1.53382	380	1		380	25.0398	1.02045	58.5125	1.53382	1	4.07151	43.0726	25
892	195.305	892	1.01903	892	164.909	892	1.17767	892	1		892	195.305	1.01903	164.909	1.17767	1	31.7569	33.0712	25
252	440.108	252	1.0227	252	69.2186	252	1.30916	252	1		252	440.108	1.0227	69.2186	1.30916	1	71.5623	36.7637	25
1276	299.668	1276	1.00901	1276	53.3197	1276	1.11863	1276	1		1276	299.668	1.00901	53.3197	1.11863	1	48.7265	31.4133	25
764	157.645	764	1.01361	764	181.411	764	1.34345	764	1		764	157.645	1.01361	181.411	1.34345	1	25.6333	37.7267	25
508	73.0993	508	1.05014	508	195.173	508	1.0941	508	1		508	73.0993	1.05014	195.173	1.0941	1	11.8861	30.7244	25
1020	228.408	1020	1.0133	1020	71.0339	1020	1.28386	1020	1		1020	228.408	1.0133	71.0339	1.28386	1	37.1395	36.0533	25
2	387.487	2	1.01803	2	139.064	2	2.07264	2	1		2	387.487	1.01803	139.064	2.07264	1	63.006	58.2037	25
1026	228.498	1026	1.02758	1026	148.222	1026	1.22508	1026	1		1026	228.498	1.02758	148.222	1.22508	1	37.1541	34.4026	25
514	448.443	514	1.01272	514	94.4717	514	1.77935	514	1		514	448.443	1.01272	94.4717	1.77935	1	72.9176	49.9676	25
258	437.282	258	1.01443	258	57.9065	258	1.2939	258	1		258	437.282	1.01443	57.9065	1.2939	1	71.1028	36.3352	25
1282	313.381	1282	1.02216	1282	91.1664	1282	1.33891	1282	1		1282	313.381	1.02216	91.1664	1.33891	1	50.9563	37.5992	25
770	379.431	770	1.04833	770	59.366	770	1.40031	770	2		770	379.431	1.04833	59.366	1.40031	2	61.6961	39.3234	50
130	457.967	130	1.06526	130	65.2205	130	1.58989	130	2		130	457.967	1.06526	65.2205	1.58989	2	74.4662	44.6472	50
1154	270.341	1154	1.03578	1154	175.649	1154	1.29006	1154	1		1154	270.341	1.03578	175.649	1.29006	1	43.9579	36.2274	25
642	117.343	642	1.01375	642	112.722	642	1.28621	642	1		642	117.343	1.01375	112.722	1.28621	1	19.0802	36.1192	25
386	461.573	386	1.02672	386	132.477	386	1.55164	386	1		386	461.573	1.02672	132.477	1.55164	1	75.0525	43.573	25
898	370.906	898	1.01251	898	68.4797	898	1.84622	898	1		898	370.906	1.01251	68.4797	1.84622	1	60.3099	51.8454	25
66	332.801	66	1.03667	66	61.7308	66	1.50189	66	1		66	332.801	1.03667	61.7308	1.50189	1	54.114	42.176	25
1090	341.226	1090	1.01369	1090	45.3266	1090	1.50189	1090	1		1090	341.226	1.01369	45.3266	1.50189	1	55.4839	42.176	25
578	349.723	578	1.04251	578	29.1473	578	1.3893	578	3		578	349.723	1.04251	29.1473	1.3893	3	56.8655	39.0142	75
322	334.876	322	1.01996	322	92.5103	322	1.13213	322	1		322	334.876	1.01996	92.5103	1.13213	1	54.4514	31.7924	25
834	391.688	834	1.01972	834	63.6721	834	2.02913	834	1		834	391.688	1.01972	63.6721	2.02913	1	63.6891	56.9819	25
194	330.9	194	1.03959	194	60.1666	194	1.25183	194	2		194	330.9	1.03959	60.1666	1.25183	2	53.8049	35.1538	50
1218	312.015	1218	1.03165	1218	177.293	1218	1.33247	1218	1		1218	312.015	1.03165	177.293	1.33247	1	50.7341	37.4183	25
706	137.415	706	1.01604	706	41.9799	706	1.23615	706	1		706	137.415	1.01604	41.9799	1.23615	1	22.3439	34.7135	25
450	46.2543	450	1.02862	450	90.8103	450	1.20234	450	1		450	46.2543	1.02862	90.8103	1.20234	1	7.52102	33.764	25
962	218.125	962	1.01537	962	141.38	962	1.13419	962	1		962	218.125	1.01537	141.38	1.13419	1	35.4675	31.8502	25
34	387.968	34	1.01836	34	55.6176	34	1.68587	34	1		34	387.968	1.01836	55.6176	1.68587	1	63.0842	47.3425	25
1058	292.575	1058	1.02812	1058	80.5574	1058	1.83557	1058	2		1058	292.575	1.02812	80.5574	1.83557	2	47.5732	51.5463	50
546	387.181	546	1.00928	546	26.1149	546	1.54088	546	2		546	387.181	1.00928	26.1149	1.54088	2	62.9563	43.2709	50
290	0	290	1.02324	290	189.692	290	1.54088	290	2		290	0	1.02324	189.692	1.54088	2	0	43.2709	50
1314	263.264	1314	1.00766	1314	46.6903	1314	1.54088	1314	2		1314	263.264	1.00766	46.6903	1.54088	2	42.8072	43.2709	50
802	169.568	802	1.01908	802	124.564	802	1.1658	802	1		802	169.568	1.01908	124.564	1.1658	1	27.572	32.7379	25
162	448.312	162	1.01079	162	331.796	162	1.26953	162	1		162	448.312	1.01079	331.796	1.26953	1	72.8963	35.6508	25
1186	303.823	1186	1.02533	1186	78.5061	1186	1.32015	1186	1		1186	303.823	1.02533	78.5061	1.32015	1	49.4021	37.0723	25
674	119.259	674	1.00608	674	50.1427	674	0.977145	674	1		674	119.259	1.00608	50.1427	0.977145	1	19.3917	27.4401	25
418	44.2167	418	1.00566	418	82.679	418	1.00608	418	1		418	44.2167	1.00566	82.679	1.00608	1	7.18971	28.2527	25
930	206.12	930	1.01224	930	222.437	930	1.50413	930	1		930	206.12	1.01224	222.437	1.50413	1	33.5154	42.2389	25
98	535.651	98	1.03542	98	72.2994	98	1.39074	98	1		98	535.651	1.03542	72.2994	1.39074	1	87.0977	39.0547	25
1122	298.05	1122	1.04818	1122	76.8594	1122	2.31984	1122	1		1122	298.05	1.04818	76.8594	2.31984	1	48.4634	65.1456	25
610	100.307	610	1.02275	610	44.1999	610	1.06627	610	1		610	100.307	1.02275	44.1999	1.06627	1	16.3101	29.9429	25
354	429.657	354	1.02942	354	132.018	354	1.85378	354	1		354	429.657	1.02942	132.018	1.85378	1	69.8629	52.0577	25
866	525.966	866	1.05268	866	189.545	866	1.60583	866	1		866	525.966	1.05268	189.545	1.60583	1	85.5229	45.0948	25
226	331.626	226	1.02594	226	76.2427	226	1.67233	226	1		226	331.626	1.02594	76.2427	1.67233	1	53.9229	46.9622	25
1250	327.331	1250	1.00988	1250	85.8157	1250	1.28987	1250	1		1250	327.331	1.00988	85.8157	1.28987	1	53.2246	36.222	25
738	471.115	738	1.01566	738	80.3759	738	1.57764	738	2		738	471.115	1.01566	80.3759	1.57764	2	76.6041	44.3032	50
482	479.667	482	1.02285	482	32.4044	482	1.78555	482	1		482	479.667	1.02285	32.4044	1.78555	1	77.9946	50.1417	25
994	507.668	994	1.02443	994	87.5629	994	1.72731	994	1		994	507.668	1.02443	87.5629	1.72731	1	82.5476	48.5062	25
18	408.202	18	1.0154	18	78.2703	18	2.35288	18	1		18	408.202	1.0154	78.2703	2.35288	1	66.3743	66.0734	25
1042	297.595	1042	1.05672	1042	42.0173	1042	1.83557	1042	2		1042	297.595	1.05672	42.0173	1.83557	2	48.3894	51.5463	50
530	73.2758	530	1.02792	530	101.561	530	1.36297	530	1		530	73.2758	1.02792	101.561	1.36297	1	11.9148	38.2748	25
274	415.445	274	1.01942	274	85.6904	274	1.41634	274	2		274	415.445	1.01942	85.6904	1.41634	2	67.552	39.7735	50
1298	204.505	1298	1.06947	1298	97.097	1298	2.31624	1298	4		1298	204.505	1.06947	97.097	2.31624	4	33.2528	65.0445	100
786	166.253	786	1.03154	786	74.1332	786	1.27021	786	1		786	166.253	1.03154	74.1332	1.27021	1	27.033	35.6699	25
146	425.773	146	1.00977	146	72.5559	146	1.89082	146	1		146	425.773	1.00977	72.5559	1.89082	1	69.2314	53.0979	25
1170	278.119	1170	1.01602	1170	137.191	1170	1.29105	1170	1		1170	278.119	1.01602	137.191	1.29105	1	45.2226	36.2552	25
658	126.655	658	1.01732	658	131.205	658	1.07004	658	1		658	126.655	1.01732	131.205	1.07004	1	20.5943	30.0488	25
402	32.8493	402	1.01525	402	105.482	402	1.11627	402	1		402	32.8493	1.01525	105.482	1.11627	1	5.34135	31.347	25
914	213.749	914	1.12447	914	58.0904	914	1.11627	914	1		914	213.749	1.12447	58.0904	1.11627	1	34.7559	31.347	25
82	339.786	82	1.01537	82	51.7398	82	1.65508	82	2		82	339.786	1.01537	51.7398	1.65508	2	55.2498	46.4778	50
1106	261.04	1106	1.02518	1106	200.601	1106	1.1872	1106	1		1106	261.04	1.02518	200.601	1.1872	1	42.4455	33.3389	25
594	477.558	594	1.01385	594	218.78	594	1.57255	594	1		594	477.558	1.01385	218.78	1.57255	1	77.6517	44.1602	25
338	15.669	338	1.01231	338	265.323	338	2.68583	338	1		338	15.669	1.01231	265.323	2.68583	1	2.5478	75.4233	25
850	482.952	850	1.01796	850	67.6662	850	1.49914	850	1		850	482.952	1.01796	67.6662	1.49914	1	78.5288	42.0987	25
210	422.185	210	1.01404	210	40.7996	210	1.35448	210	2		210	422.185	1.01404	40.7996	1.35448	2	68.648	38.0364	50
1234	310.742	1234	1.01023	1234	133.168	1234	1.23212	1234	1		1234	310.742	1.01023	133.168	1.23212	1	50.5272	34.6003	25
722	137.161	722	1.02819	722	44.3983	722	1.19187	722	2		722	137.161	1.02819	44.3983	1.19187	2	22.3026	33.47	50
466	55.6549	466	1.01527	466	101.948	466	1.1964	466	1		466	55.6549	1.01527	101.948	1.1964	1	9.04958	33.5972	25
978	222.547	978	1.02061	978	104.004	978	1.16726	978	1		978	222.547	1.02061	104.004	1.16726	1	36.1865	32.7789	25
50	515.639	50	1.01137	50	41.3686	50	1.73615	50	2		50	515.639	1.01137	41.3686	1.73615	2	83.8437	48.7544	50
1074	315.54	1074	1.01209	1074	37.3944	1074	1.70731	1074	2		1074	315.54	1.01209	37.3944	1.70731	2	51.3073	47.9445	50
562	92.1786	562	1.01442	562	94.5714	562	1.0466	562	1		562	92.1786	1.01442	94.5714	1.0466	1	14.9884	29.3905	25
306	434.441	306	1.01446	306	63.2533	306	1.89978	306	1		306	434.441	1.01446	63.2533	1.89978	1	70.6408	53.3495	25
1330	421.235	1330	1.05224	1330	244.937	1330	1.38865	1330	1		1330	421.235	1.05224	244.937	1.38865	1	68.4935	38.996	25
818	405.002	818	1.00732	818	48.937	818	1.6679	818	2		818	405.002	1.00732	48.937	1.6679	2	65.854	46.8378	50
178	407.779	178	1.0168	178	79.8594	178	1.46044	178	1		178	407.779	1.0168	79.8594	1.46044	1	66.3055	41.012	25
1202	291.786	1202	1.01527	1202	222.381	1202	1.44336	1202	1		1202	291.786	1.01527	222.381	1.44336	1	47.4449	40.5323	25
690	130.338	690	1.00852	690	44.3384	690	1.02413	690	1		690	130.338	1.00852	44.3384	1.02413	1	21.1932	28.7595	25
434	51.5521	434	1.01093	434	134.572	434	1.00038	434	1		434	51.5521	1.01093	134.572	1.00038	1	8.38246	28.0926	25
946	202.596	946	1.01501	946	51.5638	946	0.981192	946	1		946	202.596	1.01501	51.5638	0.981192	1	32.9424	27.5538	25
114	324.79	114	1.01169	114	182.997	114	1.21704	114	1		114	324.79	1.01169	182.997	1.21704	1	52.8114	34.1768	25
1138	328.56	1138	1.02114	1138	52.0686	1138	1.71293	1138	2		1138	328.56	1.02114	52.0686	1.71293	2	53.4244	48.1024	50
626	101.122	626	1.01332	626	49.7003	626	1.15049	626	2		626	101.122	1.01332	49.7003	1.15049	2	16.4426	32.308	50
370	28.5565	370	1.01828	370	222.718	370	1.47163	370	1		370	28.5565	1.01828	222.718	1.47163	1	4.64333	41.3262	25
882	376.608	882	1.02383	882	41.138	882	1.63774	882	2		882	376.608	1.02383	41.138	1.63774	2	61.2371	45.9909	50
242	307.175	242	1.02023	242	94.9469	242	1.2604	242	1		242	307.175	1.02023	94.9469	1.2604	1	49.9472	35.3945	25
1266	348.262	1266	1.01634	1266	113.666	1266	1.55948	1266	1		1266	348.262	1.01634	113.666	1.55948	1	56.628	43.7932	25
754	150.474	754	1.03367	754	92.807	754	1.38628	754	1		754	150.474	1.03367	92.807	1.38628	1	24.4673	38.9294	25
498	59.98	498	1.02331	498	88.3252	498	1.21988	498	1		498	59.98	1.02331	88.3252	1.21988	1	9.75285	34.2566	25
1010	372.389	1010	1.02994	1010	101.292	1010	1.46114	1010	1		1010	372.389	1.02994	101.292	1.46114	1	60.5511	41.0316	25
10	380.985	10	1.01665	10	47.7344	10	1.91519	10	2		10	380.985	1.01665	47.7344	1.91519	2	61.9488	53.7822	50
1034	508.03	1034	1.00393	1034	18.2072	1034	1.81666	1034	2		1034	508.03	1.00393	18.2072	1.81666	2	82.6065	51.0153	50
522	69.2331	522	1.0198	522	42.8839	522	0.810762	522	1		522	69.2331	1.0198	42.8839	0.810762	1	11.2574	22.7678	25
266	419.716	266	1.03116	266	51.7293	266	1.55213	266	1		266	419.716	1.03116	51.7293	1.55213	1	68.2465	43.5868	25
1290	109.942	1290	1.03948	1290	74.6685	1290	0.937016	1290	1		1290	109.942	1.03948	74.6685	0.937016	1	17.8767	26.3132	25
778	156.977	778	1.01375	778	46.5764	778	1.04569	778	1		778	156.977	1.01375	46.5764	1.04569	1	25.5247	29.365	25
138	444.135	138	1.05856	138	19.2057	138	1.04686	138	1		138	444.135	1.05856	19.2057	1.04686	1	72.2171	29.3978	25
1162	296.893	1162	1.02374	1162	91.2485	1162	1.43896	1162	1		1162	296.893	1.02374	91.2485	1.43896	1	48.2753	40.4088	25
650	428.209	650	1.01995	650	51.9968	650	1.73237	650	2		650	428.209	1.01995	51.9968	1.73237	2	69.6275	48.6483	50
394	29.7281	394	1.01613	394	50.0677	394	1.37215	394	1		394	29.7281	1.01613	50.0677	1.37215	1	4.83384	38.5326	25
906	192.126	906	1.01297	906	55.1932	906	2.4624	906	4		906	192.126	1.01297	55.1932	2.4624	4	31.24	69.1489	100
74	449.514	74	1.02242	74	34.9946	74	1.90028	74	2		74	449.514	1.02242	34.9946	1.90028	2	73.0917	53.3635	50
1098	314.54	1098	1.01034	1098	30.0702	1098	1.88384	1098	3		1098	314.54	1.01034	30.0702	1.88384	3	51.1447	52.9018	75
586	90.0937	586	1.02175	586	90.0007	586	1.30061	586	1		586	90.0937	1.02175	90.0007	1.30061	1	14.6494	36.5236	25
330	19.4575	330	1.01438	330	317.366	330	1.72634	330	1		330	19.4575	1.01438	317.366	1.72634	1	3.16382	48.4789	25
1354	456.377	1354	1.04693	1354	79.0712	1354	1.72634	1354	1		1354	456.377	1.04693	79.0712	1.72634	1	74.2076	48.4789	25
842	187.509	842	1.00841	842	72.1582	842	2.86888	842	4		842	187.509	1.00841	72.1582	2.86888	4	30.4893	80.5637	100
202	345.074	202	1.02921	202	47.7046	202	1.47425	202	2		202	345.074	1.02921	47.7046	1.47425	2	56.1096	41.3998	50
1226	374.893	1226	1.02165	1226	96.117	1226	1.40831	1226	1		1226	374.893	1.02165	96.117	1.40831	1	60.9582	39.548	25
714	390.824	714	1.00612	714	42.1394	714	1.62135	714	3		714	390.824	1.00612	42.1394	1.62135	3	63.5486	45.5306	75
458	440.08	458	1.00917	458	52.1502	458	1.9397	458	1		458	440.08	1.00917	52.1502	1.9397	1	71.5577	54.4705	25
970	333.22	970	1.03368	970	73.4149	970	1.66844	970	2		970	333.22	1.03368	73.4149	1.66844	2	54.1821	46.853	50
42	528.5	42	1.01181	42	126.993	42	1.6122	42	1		42	528.5	1.01181	126.993	1.6122	1	85.935	45.2737	25
1066	247.512	1066	1.01833	1066	64.1117	1066	1.3032	1066	1		1066	247.512	1.01833	64.1117	1.3032	1	40.2459	36.5964	25
554	77.1706	554	1.01244	554	100.162	554	1.52752	554	1		554	77.1706	1.01244	100.162	1.52752	1	12.5481	42.8957	25
298	351.689	298	1.01553	298	49.1862	298	1.34897	298	1		298	351.689	1.01553	49.1862	1.34897	1	57.1852	37.8817	25
1322	586.832	1322	1.01747	1322	71.202	1322	1.67604	1322	1		1322	586.832	1.01747	71.202	1.67604	1	95.4198	47.0664	25
810	168.54	810	1.01037	810	88.1389	810	1.35211	810	2		810	168.54	1.01037	88.1389	1.35211	2	27.4049	37.9698	50
170	576.087	170	1.02466	170	112.615	170	1.41835	170	1		170	576.087	1.02466	112.615	1.41835	1	93.6727	39.83	25
1194	278.385	1194	1.07114	1194	125.835	1194	1.02509	1194	1		1194	278.385	1.07114	125.835	1.02509	1	45.2659	28.7865	25
682	135.346	682	1.01928	682	139.383	682	1.114	682	1		682	135.346	1.01928	139.383	1.114	1	22.0075	31.2833	25
426	40.7017	426	1.01925	426	68.0047	426	1.05145	426	1		426	40.7017	1.01925	68.0047	1.05145	1	6.61816	29.5267	25
938	224.671	938	1.02401	938	53.197	938	2.30491	938	3		938	224.671	1.02401	53.197	2.30491	3	36.5319	64.7263	75
106	583.38	106	1.02537	106	82.2239	106	1.31396	106	3		106	583.38	1.02537	82.2239	1.31396	3	94.8585	36.8985	75
1130	265.316	1130	1.03886	1130	108.03	1130	1.02749	1130	1		1130	265.316	1.03886	108.03	1.02749	1	43.1408	28.8539	25
618	108.178	618	1.01487	618	113.038	618	1.32598	618	1		618	108.178	1.01487	113.038	1.32598	1	17.5899	37.2361	25
362	428.493	362	1.04858	362	137.322	362	1.2882	362	1		362	428.493	1.04858	137.322	1.2882	1	69.6737	36.1751	25
874	388.672	874	1.03094	874	32.2987	874	1.35986	874	2		874	388.672	1.03094	32.2987	1.35986	2	63.1987	38.1875	50
234	314.273	234	1.032	234	74.9717	234	1.28249	234	1		234	314.273	1.032	74.9717	1.28249	1	51.1013	36.0148	25
1258	295.85	1258	1.01611	1258	61.2688	1258	0.953836	1258	1		1258	295.85	1.01611	61.2688	0.953836	1	48.1057	26.7855	25
746	155.612	746	1.02806	746	87.1154	746	1.20835	746	1		746	155.612	1.02806	87.1154	1.20835	1	25.3028	33.9328	25
490	50.8195	490	1.00616	490	130.854	490	1.1595	490	1		490	50.8195	1.00616	130.854	1.1595	1	8.26333	32.561	25
1002	227.33	1002	1.02667	1002	136.07	1002	1.35762	1002	1		1002	227.33	1.02667	136.07	1.35762	1	36.9642	38.1246	25
26	395.22	26	1.00876	26	75.8624	26	1.73406	26	1		26	395.22	1.00876	75.8624	1.73406	1	64.2634	48.6957	25
1050	243.781	1050	1.02253	1050	164.232	1050	1.37342	1050	1		1050	243.781	1.02253	164.232	1.37342	1	39.6392	38.5683	25
538	414.641	538	1.01042	538	38.4448	538	1.81152	538	3		538	414.641	1.01042	38.4448	1.81152	3	67.4213	50.871	75
282	379.484	282	1.00882	282	81.1221	282	2.07566	282	1		282	379.484	1.00882	81.1221	2.07566	1	61.7047	58.2885	25
1306	145.033	1306	1.02977	1306	51.187	1306	2.07566	1306	1		1306	145.033	1.02977	51.187	2.07566	1	23.5826	58.2885	25
794	162.51	794	1.02755	794	126.345	794	1.56561	794	1		794	162.51	1.02755	126.345	1.56561	1	26.4244	43.9653	25
154	393.31	154	1.01877	154	76.4868	154	1.32064	154	1		154	393.31	1.01877	76.4868	1.32064	1	63.9528	37.0861	25
1178	341.07	1178	1.02368	1178	26.6295	1178	1.9597	1178	3		1178	341.07	1.02368	26.6295	1.9597	3	55.4585	55.0321	75
666	125.283	666	1.03098	666	103.682	666	1.28219	666	1		666	125.283	1.03098	103.682	1.28219	1	20.3712	36.0064	25
410	568.532	410	1.0162	410	87.0334	410	1.60928	410	2		410	568.532	1.0162	87.0334	1.60928	2	92.4442	45.1917	50
922	200.399	922	1.01161	922	78.1345	922	2.4624	922	4		922	200.399	1.01161	78.1345	2.4624	4	32.5852	69.1489	100
90	438.612	90	1.03604	90	100.807	90	1.78732	90	1		90	438.612	1.03604	100.807	1.78732	1	71.319	50.1914	25
1114	406.053	1114	1.0139	1114	21.9487	1114	1.81455	1114	2		1114	406.053	1.0139	21.9487	1.81455	2	66.0249	50.956	50
602	90.982	602	1.02543	602	93.801	602	1.39286	602	1		602	90.982	1.02543	93.801	1.39286	1	14.7938	39.1142	25
346	25.1071	346	1.02269	346	243.461	346	1.40595	346	1		346	25.1071	1.02269	243.461	1.40595	1	4.08246	39.4818	25
858	196.316	858	1.02821	858	121.771	858	2.61683	858	4		858	196.316	1.02821	121.771	2.61683	4	31.9213	73.4856	100
218	325.976	218	1.02763	218	56.4242	218	1.22783	218	1		218	325.976	1.02763	56.4242	1.22783	1	53.0042	34.4798	25
1242	537.703	1242	1.00428	1242	33.9233	1242	1.53923	1242	2		1242	537.703	1.00428	33.9233	1.53923	2	87.4314	43.2245	50
730	475.191	730	1.02111	730	49.2039	730	1.78797	730	2		730	475.191	1.02111	49.2039	1.78797	2	77.2668	50.2096	50
986	424.816	986	1.01729	986	74.1849	986	1.55812	986	1		986	424.816	1.01729	74.1849	1.55812	1	69.0758	43.755	25
58	436.851	58	1.03126	58	119.568	58	1.78669	58	1		58	436.851	1.03126	119.568	1.78669	1	71.0327	50.1737	25
1082	256.625	1082	1.00558	1082	60.4644	1082	1.0733	1082	1		1082	256.625	1.00558	60.4644	1.0733	1	41.7276	30.1403	25
570	100.688	570	1.0238	570	139.58	570	1.45393	570	1		570	100.688	1.0238	139.58	1.45393	1	16.372	40.8291	25
314	335.66	314	1.01586	314	39.0038	314	1.25183	314	2		314	335.66	1.01586	39.0038	1.25183	2	54.5789	35.1538	50
1338	229.5	1338	1.0423	1338	151.416	1338	1.1353	1338	1		1338	229.5	1.0423	151.416	1.1353	1	37.3171	31.8814	25
826	394.266	826	1.01655	826	100.555	826	1.54813	826	1		826	394.266	1.01655	100.555	1.54813	1	64.1083	43.4745	25
1210	364.96	1210	1.02196	1210	114.705	1210	2.42127	1210	1		1210	364.96	1.02196	114.705	2.42127	1	59.3431	67.9939	25
698	397.395	698	1.00901	698	62.2484	698	2.37603	698	1		698	397.395	1.00901	62.2484	2.37603	1	64.6171	66.7235	25
442	36.1459	442	1.01965	442	40.8891	442	0.827126	442	1		442	36.1459	1.01965	40.8891	0.827126	1	5.87738	23.2273	25
954	490.871	954	1.03229	954	73.4763	954	1.43813	954	1		954	490.871	1.03229	73.4763	1.43813	1	79.8164	40.3855	25
122	405.655	122	1.02008	122	87.9483	122	1.45033	122	1		122	405.655	1.02008	87.9483	1.45033	1	65.9602	40.7281	25
1146	564.441	1146	1.01954	1146	87.5518	1146	1.45033	1146	1		1146	564.441	1.01954	87.5518	1.45033	1	91.779	40.7281	25
634	475.588	634	1.02371	634	88.8071	634	1.46132	634	1		634	475.588	1.02371	88.8071	1.46132	1	77.3314	41.0367	25
378	389.325	378	1.0036	378	48.9072	378	1.54088	378	2		378	389.325	1.0036	48.9072	1.54088	2	63.3049	43.2709	50
890	496.729	890	1.01652	890	69.4439	890	1.70894	890	3		890	496.729	1.01652	69.4439	1.70894	3	80.7689	47.9903	75
250	442.152	250	1.03717	250	40.6791	250	1.46788	250	2		250	442.152	1.03717	40.6791	1.46788	2	71.8946	41.2209	50
1274	304.061	1274	1.02544	1274	89.5745	1274	1.26752	1274	1		1274	304.061	1.02544	89.5745	1.26752	1	49.4408	35.5944	25
762	513.203	762	1.02626	762	152.466	762	1.56217	762	1		762	513.203	1.02626	152.466	1.56217	1	83.4476	43.8687	25
506	516.355	506	1.04359	506	143.397	506	1.90658	506	1		506	516.355	1.04359	143.397	1.90658	1	83.9602	53.5404	25
1018	224.114	1018	1.01555	1018	32.5871	1018	1.39992	1018	1		1018	224.114	1.01555	32.5871	1.39992	1	36.4413	39.3124	25
6	384.603	6	1.02054	6	136.979	6	1.6669	6	1		6	384.603	1.02054	136.979	1.6669	1	62.5371	46.8098	25
1030	244.009	1030	1.05853	1030	41.0152	1030	1.6669	1030	1		1030	244.009	1.05853	41.0152	1.6669	1	39.6763	46.8098	25
518	64.4957	518	1.02468	518	96.2857	518	1.34091	518	1		518	64.4957	1.02468	96.2857	1.34091	1	10.4871	37.6553	25
262	388.557	262	1.01213	262	36.6783	262	2.119	262	2		262	388.557	1.01213	36.6783	2.119	2	63.18	59.5056	50
1286	385.702	1286	1.01138	1286	49.1744	1286	1.80559	1286	3		1286	385.702	1.01138	49.1744	1.80559	3	62.7158	50.7044	75
774	147.358	774	1.03538	774	50.2393	774	1.30888	774	2		774	147.358	1.03538	50.2393	1.30888	2	23.9607	36.7559	50
134	452.66	134	1.09971	134	44.0354	134	1.47371	134	1		134	452.66	1.09971	44.0354	1.47371	1	73.6033	41.3846	25
1158	362.76	1158	1.01961	1158	52.6932	1158	1.17043	1158	2		1158	362.76	1.01961	52.6932	1.17043	2	58.9854	32.8679	50
646	462.296	646	1.03399	646	72.5424	646	1.23359	646	1		646	462.296	1.03399	72.5424	1.23359	1	75.1701	34.6416	25
390	358.537	390	1.03262	390	114.043	390	2.09667	390	1		390	358.537	1.03262	114.043	2.09667	1	58.2987	58.8785	25
902	362.039	902	1.04428	902	82.075	902	1.58349	902	1		902	362.039	1.04428	82.075	1.58349	1	58.8681	44.4674	25
70	356.859	70	1.00842	70	32.9741	70	1.50107	70	2		70	356.859	1.00842	32.9741	1.50107	2	58.0259	42.1529	50
1094	329.549	1094	1.02267	1094	22.6639	1094	1.69694	1094	3		1094	329.549	1.02267	22.6639	1.69694	3	53.5852	47.6533	75
582	80.3557	582	1.0293	582	93.9646	582	1.28251	582	1		582	80.3557	1.0293	93.9646	1.28251	1	13.066	36.0153	25
326	469.799	326	1.06754	326	33.845	326	1.28251	326	1		326	469.799	1.06754	33.845	1.28251	1	76.3901	36.0153	25
1350	473.299	1350	1.01057	1350	42.1361	1350	1.58143	1350	3		1350	473.299	1.01057	42.1361	1.58143	3	76.9592	44.4096	75
838	187.015	838	1.05977	838	122.809	838	0.98779	838	1		838	187.015	1.05977	122.809	0.98779	1	30.4089	27.739	25
198	361.437	198	1.01903	198	30.5921	198	1.50107	198	2		198	361.437	1.01903	30.5921	1.50107	2	58.7702	42.1529	50
710	395.553	710	1.01431	710	105.775	710	1.83263	710	1		710	395.553	1.01431	105.775	1.83263	1	64.3176	51.4638	25
454	60.058	454	1.02473	454	195.315	454	1.02482	454	1		454	60.058	1.02473	195.315	1.02482	1	9.76553	28.7789	25
966	217.342	966	1.04058	966	77.2146	966	1.17094	966	1		966	217.342	1.04058	77.2146	1.17094	1	35.3402	32.8822	25
38	375.427	38	1.0187	38	110.048	38	1.40121	38	1		38	375.427	1.0187	110.048	1.40121	1	61.045	39.3487	25
1062	273.259	1062	1.02646	1062	65.9835	1062	1.30087	1062	1		1062	273.259	1.02646	65.9835	1.30087	1	44.4324	36.5309	25
550	371.65	550	1.02469	550	72.0796	550	1.44231	550	1		550	371.65	1.02469	72.0796	1.44231	1	60.4309	40.5028	25
294	368.646	294	1.01105	294	79.5131	294	1.65832	294	1		294	368.646	1.01105	79.5131	1.65832	1	59.9424	46.5688	25
1318	320.955	1318	1.03711	1318	55.1621	1318	1.65832	1318	1		1318	320.955	1.03711	55.1621	1.65832	1	52.1878	46.5688	25
806	174.432	806	1.01604	806	59.525	806	2.07892	806	2		806	174.432	1.01604	59.525	2.07892	2	28.3629	58.3801	50
166	429.011	166	1.02452	166	59.0107	166	1.29982	166	1		166	429.011	1.02452	59.0107	1.29982	1	69.7579	36.5014	25
1190	280.658	1190	1.00944	1190	71.5294	1190	0.923989	1190	1		1190	280.658	1.00944	71.5294	0.923989	1	45.6354	25.9474	25
678	127.009	678	1.01548	678	84.7541	678	1.24053	678	1		678	127.009	1.01548	84.7541	1.24053	1	20.6519	34.8365	25
422	27.5201	422	1.01578	422	77.8485	422	1.07019	422	1		422	27.5201	1.01578	77.8485	1.07019	1	4.47481	30.053	25
934	514.225	934	1.03607	934	248.222	934	1.47995	934	1		934	514.225	1.03607	248.222	1.47995	1	83.6138	41.5598	25
102	589.135	102	1.02914	102	101.955	102	1.31396	102	3		102	589.135	1.02914	101.955	1.31396	3	95.7943	36.8985	75
1126	268.299	1126	1.01818	1126	106.866	1126	1.08695	1126	1		1126	268.299	1.01818	106.866	1.08695	1	43.6259	30.5236	25
614	89.7012	614	1.0069	614	45.8322	614	1.09228	614	1		614	89.7012	1.0069	45.8322	1.09228	1	14.5856	30.6733	25
358	424.185	358	1.01494	358	54.6494	358	1.41634	358	2		358	424.185	1.01494	54.6494	1.41634	2	68.9732	39.7735	50
870	190.686	870	1.03183	870	114.867	870	1.12178	870	1		870	190.686	1.03183	114.867	1.12178	1	31.0059	31.5017	25
230	546.786	230	1.01769	230	43.1819	230	1.42041	230	2		230	546.786	1.01769	43.1819	1.42041	2	88.9083	39.8878	50
1254	298.96	1254	1.02046	1254	44.5909	1254	1.04264	1254	1		1254	298.96	1.02046	44.5909	1.04264	1	48.6114	29.2793	25
742	146.556	742	1.03152	742	58.8524	742	1.53468	742	1		742	146.556	1.03152	58.8524	1.53468	1	23.8302	43.0968	25
486	471.348	486	1.02106	486	82.618	486	1.28514	486	1		486	471.348	1.02106	82.618	1.28514	1	76.642	36.0892	25
998	226.56	998	1.01012	998	66.8513	998	1.66197	998	2		998	226.56	1.01012	66.8513	1.66197	2	36.839	46.6713	50
22	397.585	22	1.0325	22	93.1654	22	1.71922	22	1		22	397.585	1.0325	93.1654	1.71922	1	64.648	48.279	25
1046	250.558	1046	1.02772	1046	74.1926	1046	1.31561	1046	1		1046	250.558	1.02772	74.1926	1.31561	1	40.7411	36.9449	25
534	79.3296	534	1.0141	534	78.3159	534	1.13061	534	1		534	79.3296	1.0141	78.3159	1.13061	1	12.8991	31.7497	25
278	0	278	1.03533	278	156.936	278	1.30241	278	1		278	0	1.03533	156.936	1.30241	1	0	36.5742	25
1302	134.782	1302	1.06795	1302	90.7133	1302	2.20143	1302	1		1302	134.782	1.06795	90.7133	2.20143	1	21.9158	61.8204	25
790	481.337	790	1.01439	790	31.5426	790	1.61309	790	2		790	481.337	1.01439	31.5426	1.61309	2	78.2662	45.2987	50
150	414.794	150	1.01159	150	42.1386	150	1.63117	150	2		150	414.794	1.01159	42.1386	1.63117	2	67.4462	45.8064	50
1174	272.119	1174	1.01908	1174	113.545	1174	1.1993	1174	1		1174	272.119	1.01908	113.545	1.1993	1	44.247	33.6786	25
662	111.409	662	1.01142	662	34.1365	662	1.14229	662	2		662	111.409	1.01142	34.1365	1.14229	2	18.1153	32.0777	50
406	437.866	406	1.04337	406	71.8564	406	1.88594	406	2		406	437.866	1.04337	71.8564	1.88594	2	71.1977	52.9608	50
918	357.451	918	1.05127	918	83.8497	918	1.58729	918	1		918	357.451	1.05127	83.8497	1.58729	1	58.1221	44.5742	25
86	336.033	86	1.04455	86	63.1993	86	1.47713	86	2		86	336.033	1.04455	63.1993	1.47713	2	54.6395	41.4806	50
1110	262.862	1110	1.01716	1110	296.879	1110	1.33114	1110	1		1110	262.862	1.01716	296.879	1.33114	1	42.7418	37.381	25
598	352.554	598	1.02948	598	315.228	598	1.28719	598	1		598	352.554	1.02948	315.228	1.28719	1	57.3259	36.1468	25
342	14.1014	342	1.01051	342	131.463	342	1.91871	342	1		342	14.1014	1.01051	131.463	1.91871	1	2.29291	53.8811	25
1366	466.911	1366	1.09869	1366	85.6627	854	1.16472	854	1		854	186.499	1.02808	179.151	1.16472	1	75.9205	32.7076	25
854	186.499	854	1.02808	854	179.151	214	1.61962	214	1		214	410.733	1.02593	64.5403	1.61962	1	30.325	45.482	25
214	410.733	214	1.02593	214	64.5403	1238	1.10651	1238	1		1238	293.437	1.01882	75.2613	1.10651	1	66.7859	31.0729	25
1238	293.437	1238	1.01882	1238	75.2613	726	1.57968	726	1		726	486.645	1.02755	144.373	1.57968	1	47.7133	44.3604	25
726	486.645	726	1.02755	726	144.373	470	1.09894	470	1		470	61.9961	1.02601	104.428	1.09894	1	79.1293	30.8603	25
470	61.9961	470	1.02601	470	104.428	982	1.18299	982	1		982	223.911	1.03822	163.681	1.18299	1	10.0807	33.2206	25
982	223.911	982	1.03822	982	163.681	1078	1.62417	1078	1		1078	280.54	1.03278	63.0121	1.62417	1	36.4083	45.6098	25
1078	280.54	1078	1.03278	1078	63.0121	566	1.05286	566	1		566	84.5764	1.02087	30.6249	1.05286	1	45.6163	29.5663	25
566	84.5764	566	1.02087	566	30.6249	310	1.57126	310	2		310	431.549	1.02035	51.9058	1.57126	2	13.7523	44.124	50
310	431.549	310	1.02035	310	51.9058	1334	1.25152	1334	1		1334	353.402	1.09457	134.327	1.25152	1	70.1706	35.1451	25
1334	353.402	1334	1.09457	1334	134.327	822	2.5476	822	2		822	178.48	1.01681	78.5925	2.5476	2	57.4637	71.5415	50
822	178.48	822	1.01681	822	78.5925	182	1.48087	182	2		182	403.499	1.03322	51.4309	1.48087	2	29.0211	41.5857	50
182	403.499	182	1.03322	182	51.4309	1206	1.42053	1206	2		1206	534.309	1.02053	53.7789	1.42053	2	65.6096	39.8912	50
1206	534.309	1206	1.02053	1206	53.7789	694	1.04952	694	1		694	141.955	1.03107	96.0707	1.04952	1	86.8795	29.4725	25
694	141.955	694	1.03107	694	96.0707	438	1.29521	438	1		438	36.1041	1.01655	82.176	1.29521	1	23.0821	36.372	25
438	36.1041	438	1.01655	438	82.176	950	2.06424	950	1		950	502.519	1.01476	109.043	2.06424	1	5.87059	57.9678	25
950	502.519	950	1.01476	950	109.043	118	2.06424	118	1		118	612.052	1.03727	62.1865	2.06424	1	81.7104	57.9678	25
118	612.052	118	1.03727	118	62.1865	1142	2.06951	1142	2		1142	305.235	1.01268	36.6188	2.06951	2	99.5207	58.1158	50
1142	305.235	1142	1.01268	1142	36.6188	630	1.08448	630	1		630	112.217	1.02198	122.356	1.08448	1	49.6317	30.4543	25
630	112.217	630	1.02198	630	122.356	374	1.15447	374	1		374	35.5634	1.01911	263.204	1.15447	1	18.2467	32.4197	25
374	35.5634	374	1.01911	374	263.204	886	1.22995	886	1		886	189.524	1.01649	64.7661	1.22995	1	5.78267	34.5394	25
886	189.524	886	1.01649	886	64.7661	246	2.01554	246	1		246	507.558	1.02397	94.8299	2.01554	1	30.8169	56.6002	25
246	507.558	246	1.02397	246	94.8299	1270	1.51266	1270	1		1270	311.988	1.01041	66.6865	1.51266	1	82.5298	42.4784	25
1270	311.988	1270	1.01041	1270	66.6865	758	1.51266	758	1		758	522.694	1.0171	32.3574	1.51266	1	50.7298	42.4784	25
758	522.694	758	1.0171	758	32.3574	502	1.29115	502	1		502	67.1684	1.02786	117.754	1.29115	1	84.9909	36.258	25
502	67.1684	502	1.02786	502	117.754	1014	1.29115	1014	1		1014	240.207	1.02594	92.503	1.29115	1	10.9217	36.258	25
1014	240.207	1014	1.02594	1014	92.503	14	1.69595	14	2		14	366.315	1.00797	36.0449	1.69595	2	39.058	47.6255	50
14	366.315	14	1.00797	14	36.0449	1038	1.804	1038	1		1038	508.818	1.03543	197.283	1.804	1	59.5634	50.6598	25
1038	508.818	1038	1.03543	1038	197.283	526	1.23723	526	1		526	71.8495	1.0214	103.813	1.23723	1	82.7346	34.7438	25
526	71.8495	526	1.0214	526	103.813	270	1.63867	270	1		270	419.01	1.06635	70.9849	1.63867	1	11.6828	46.017	25
270	419.01	270	1.06635	270	70.9849	1294	1.66538	1294	3		1294	458.993	1.01138	21.7016	1.66538	3	68.1317	46.7671	75
1294	458.993	1294	1.01138	1294	21.7016	782	1.00359	782	1		782	169.515	1.01476	54.6628	1.00359	1	74.633	28.1827	25
782	169.515	782	1.01476	782	54.6628	142	1.86011	142	1		142	428.729	1.02471	102.212	1.86011	1	27.5634	52.2355	25
142	428.729	142	1.02471	142	102.212	1166	1.30079	1166	1		1166	293.05	1.01571	138.335	1.30079	1	69.712	36.5287	25
1166	293.05	1166	1.01571	1166	138.335	654	1.55059	654	1		654	117.482	1.01761	89.8628	1.55059	1	47.6504	43.5435	25
654	117.482	654	1.01761	654	89.8628	398	1.05098	398	1		398	33.0166	1.00445	37.7803	1.05098	1	19.1028	29.5135	25
398	33.0166	398	1.00445	398	37.7803	910	1.07362	910	1		910	196.158	1.01703	73.1481	1.07362	1	5.36855	30.1493	25
910	196.158	910	1.01703	910	73.1481	78	1.51108	78	1		78	344.217	1.02193	100.552	1.51108	1	31.8956	42.434	25
78	344.217	78	1.02193	78	100.552	1102	1.26545	1102	1		1102	285.822	1.01587	67.5396	1.26545	1	55.9702	35.5363	25
1102	285.822	1102	1.01587	1102	67.5396	590	1.10757	590	1		590	99.9187	1.01421	125.828	1.10757	1	46.4751	31.1027	25
590	99.9187	590	1.01421	590	125.828	846	2.459	846	2		846	188.383	1.02255	98.0178	2.459	2	16.2469	69.0534	50
1358	206.054	1358	1.01391	1358	50.3612	206	1.73037	206	1		206	430.316	1.03232	51.1848	1.73037	1	33.5047	48.5921	25
846	188.383	846	1.02255	846	98.0178	1230	1.66781	1230	1		1230	354.384	1.01479	64.094	1.66781	1	30.6314	46.8353	25
206	430.316	206	1.03232	206	51.1848	462	1.09336	462	1		462	47.1038	1.01172	48.4887	1.09336	1	69.9701	30.7036	25
1230	354.384	1230	1.01479	1230	64.094	974	1.09336	974	1		974	212.657	1.009	62.8995	1.09336	1	57.6234	30.7036	25
462	47.1038	462	1.01172	462	48.4887	46	1.19326	46	1		46	373.906	1.03215	197.129	1.19326	1	7.65915	33.509	25
974	212.657	974	1.009	974	62.8995	1070	1.60726	1070	3		1070	521.789	1.01428	22.6793	1.60726	3	34.5784	45.1349	75
46	373.906	46	1.03215	46	197.129	558	0.958236	558	1		558	81.1898	1.00942	32.8631	0.958236	1	60.7977	26.9091	25
1070	521.789	1070	1.01428	1070	22.6793	302	1.92076	302	2		302	0	1.02356	249.624	1.92076	2	84.8437	53.9386	50
558	81.1898	558	1.00942	558	32.8631	1326	1.26284	1326	1		1326	544.938	1.02482	121.009	1.26284	1	13.2016	35.463	25
302	0	302	1.02356	302	249.624	814	1.18326	814	1		814	172.162	1.03757	108.108	1.18326	1	0	33.2282	25
1326	544.938	1326	1.02482	1326	121.009	174	1.66931	174	2		174	419.705	1.0417	65.1551	1.66931	2	88.6078	46.8774	50
814	172.162	814	1.03757	814	108.108	1198	1.79476	1198	1		1198	340.971	1.01646	55.6595	1.79476	1	27.9938	50.4003	25
174	419.705	174	1.0417	174	65.1551	686	1.75627	686	2		686	423.168	1.0085	90.6016	1.75627	2	68.2447	49.3194	50
1198	340.971	1198	1.01646	1198	55.6595	430	0.78422	430	1		430	40.5036	1.01154	46.5993	0.78422	1	55.4424	22.0224	25
686	423.168	686	1.0085	686	90.6016	942	2.76457	942	2		942	205.377	1.01389	107.922	2.76457	2	68.8078	77.6344	50
430	40.5036	430	1.01154	430	46.5993	110	1.44006	110	1		110	571.685	1.0289	141.25	1.44006	1	6.58595	40.4397	25
942	205.377	942	1.01389	942	107.922	1134	1.70334	1134	1		1134	334.383	1.01002	66.5269	1.70334	1	33.3946	47.8331	25
110	571.685	110	1.0289	110	141.25	622	1.0705	622	1		622	107.392	1.02273	56.6465	1.0705	1	92.9569	30.0617	25
1134	334.383	1134	1.01002	1134	66.5269	366	1.60929	366	1		366	19.3738	1.01842	58.2694	1.60929	1	54.3712	45.192	25
622	107.392	622	1.02273	622	56.6465	878	1.37683	878	1		878	382.187	1.02693	73.4797	1.37683	1	17.4621	38.664	25
366	19.3738	366	1.01842	366	58.2694	238	1.53719	238	1		238	545.664	1.01838	69.3467	1.53719	1	3.15021	43.1672	25
878	382.187	878	1.02693	878	73.4797	1262	2.27893	1262	2		1262	373.272	1.03736	47.8052	2.27893	2	62.1442	63.9967	50
238	545.664	238	1.01838	238	69.3467	750	1.19765	750	1		750	163.09	1.06235	106.693	1.19765	1	88.7259	33.6323	25
1262	373.272	1262	1.03736	1262	47.8052	494	1.52784	494	2		494	54.8738	1.02079	56.9808	1.52784	2	60.6946	42.9047	50
750	163.09	750	1.06235	750	106.693	1006	1.80212	1006	3		1006	383.736	1.02777	41.8779	1.80212	3	26.5187	50.607	75
494	54.8738	494	1.02079	494	56.9808	1054	1.73102	1054	1		1054	320.262	1.01769	88.407	1.73102	1	8.92257	48.6104	25
1006	383.736	1006	1.02777	1006	41.8779	542	1.22863	542	2		542	62.3548	1.00434	44.0674	1.22863	2	62.3961	34.5023	50
1054	320.262	1054	1.01769	1054	88.407	1310	1.67129	1310	2		1310	147.837	1.06549	74.9554	1.67129	2	52.0751	46.933	50
542	62.3548	542	1.00434	542	44.0674	798	1.18643	798	1		798	166.489	1.01488	51.1269	1.18643	1	10.139	33.3172	25
1310	147.837	1310	1.06549	1310	74.9554	158	1.15581	158	1		158	330.172	1.01539	50.3802	1.15581	1	24.0385	32.4574	25
798	166.489	798	1.01488	798	51.1269	1182	1.7425	1182	2		1182	330.185	1.01782	63.9462	1.7425	2	27.0714	48.9327	50
158	330.172	158	1.01539	158	50.3802	670	1.03807	670	1		670	141.107	1.01882	93.4332	1.03807	1	53.6865	29.151	25
1182	330.185	1182	1.01782	1182	63.9462	414	0.936724	414	1		414	30.3248	1.01753	92.0358	0.936724	1	53.6886	26.305	25
670	141.107	670	1.01882	670	93.4332	926	2.16316	926	2		926	200.982	1.01389	57.3482	2.16316	2	22.9442	60.7457	50
414	30.3248	414	1.01753	414	92.0358	94	1.43277	94	1		94	337.294	1.04883	117.165	1.43277	1	4.93086	40.2349	25
926	200.982	926	1.01389	926	57.3482	1118	1.88384	1118	3		1118	312.969	1.01176	30.3989	1.88384	3	32.68	52.9018	75
94	337.294	94	1.04883	94	117.165	606	1.68843	606	1		606	107.864	1.02423	201.925	1.68843	1	54.8446	47.4144	25
1118	312.969	1118	1.01176	1118	30.3989	350	1.85308	350	1		350	414.697	1.02305	98.8709	1.85308	1	50.8893	52.038	25
606	107.864	606	1.02423	606	201.925	862	1.9664	862	2		862	185.489	1.03818	86.0163	1.9664	2	17.5389	55.2203	50
350	414.697	350	1.02305	350	98.8709	222	1.12285	222	1		222	416.285	1.03132	205.46	1.12285	1	67.4304	31.5318	25
862	185.489	862	1.03818	862	86.0163	1246	1.78945	1246	2		1246	532.692	1.01901	54.1997	1.78945	2	30.1608	50.2512	50
222	416.285	222	1.03132	222	205.46	734	1.33348	734	2		734	362.754	1.0739	38.2857	1.33348	2	67.6886	37.4467	50
1246	532.692	1246	1.01901	1246	54.1997	478	1.00581	478	1		478	59.6343	1.02142	64.1064	1.00581	1	86.6166	28.2451	25
734	362.754	734	1.0739	734	38.2857	990	2.23501	990	3		990	406.319	1.01527	73.3632	2.23501	3	58.9844	62.7634	75
478	59.6343	478	1.02142	478	64.1064	62	1.27905	62	1		62	439.349	1.05303	82.5549	1.27905	1	9.69663	35.9182	25
990	406.319	990	1.01527	990	73.3632	1086	1.11285	1086	1		1086	250.843	1.01913	147.94	1.11285	1	66.0681	31.251	25
62	439.349	62	1.05303	62	82.5549	574	1.11285	574	1		574	101.544	1.01503	77.1736	1.11285	1	71.4389	31.251	25
1086	250.843	1086	1.01913	1086	147.94	318	1.92076	318	2		318	0	1.00761	42.7374	1.92076	2	40.7875	53.9386	50
574	101.544	574	1.01503	574	77.1736	1342	1.17322	1342	1		1342	120.889	1.0284	98.9596	1.17322	1	16.5112	32.9463	25
318	0	318	1.00761	318	42.7374	830	1.06275	830	1		830	175.744	1.01452	67.7134	1.06275	1	0	29.8441	25
1342	120.889	1342	1.0284	1342	98.9596	190	1.78472	190	2		190	427.914	1.01017	62.122	1.78472	2	19.6567	50.1184	50
830	175.744	830	1.01452	830	67.7134	1214	1.49529	1214	2		1214	343.73	1.01721	25.643	1.49529	2	28.5763	41.9906	50
190	427.914	190	1.01017	190	62.122	702	1.41496	702	1		702	129.821	1.01018	88.9677	1.41496	1	69.5795	39.7348	25
1214	343.73	1214	1.01721	1214	25.643	446	0.975474	446	1		446	51.9591	1.06534	82.8274	0.975474	1	55.8911	27.3932	25
702	129.821	702	1.01018	702	88.9677	958	2.39579	958	2		958	217.729	1.01597	115.429	2.39579	2	21.1091	67.2784	50
446	51.9591	446	1.06534	446	82.8274	126	1.40153	126	1		126	392.5	1.02483	70.7658	1.40153	1	8.44863	39.3577	25
958	217.729	958	1.01597	958	115.429	1150	1.08961	1150	1		1150	268.621	1.01867	50.8686	1.08961	1	35.4031	30.5983	25
126	392.5	126	1.02483	126	70.7658	638	1.15049	638	2		638	106.802	1.00741	41.5302	1.15049	2	63.8211	32.308	50
1150	268.621	1150	1.01867	1150	50.8686	382	1.15049	382	2		382	476.891	1.0309	30.38	1.15049	2	43.6782	32.308	50
638	106.802	638	1.00741	638	41.5302	894	1.1028	894	1		894	193.07	1.01452	75.9957	1.1028	1	17.3662	30.9687	25
382	476.891	382	1.0309	382	30.38	254	1.77611	254	1		254	419.273	1.02993	105.33	1.77611	1	77.5433	49.8766	25
894	193.07	894	1.01452	894	75.9957	1278	2.19378	1278	1		1278	385.817	1.0165	69.8855	2.19378	1	31.3935	61.6056	25
254	419.273	254	1.02993	254	105.33	766	1.33337	766	1		766	160.542	1.01852	110.415	1.33337	1	68.1745	37.4436	25
1278	385.817	1278	1.0165	1278	69.8855	510	1.57505	510	2		510	423.796	1.00531	26.8974	1.57505	2	62.7345	44.2304	50
766	160.542	766	1.01852	766	110.415	1022	1.54904	1022	1		1022	233.454	1.01476	92.8112	1.54904	1	26.1044	43.5	25
510	423.796	510	1.00531	510	26.8974	1	1.45069	1	1		1	564.213	1.01427	176.626	1.45069	1	68.9099	40.7382	25
1022	233.454	1022	1.01476	1022	92.8112	1025	1.37771	1025	2		1025	360.746	1.02855	36.3305	1.37771	2	37.96	38.6887	50
1	564.213	1	1.01427	1	176.626	513	1.45388	513	1		513	57.9589	1.04779	133.641	1.45388	1	91.742	40.8277	25
1025	360.746	1025	1.02855	1025	36.3305	257	1.78472	257	2		257	431.14	1.00319	39.2216	1.78472	2	58.6579	50.1184	50
513	57.9589	513	1.04779	513	133.641	1281	1.27339	1281	2		1281	317.918	1.02026	69.4037	1.27339	2	9.42421	35.7592	50
257	431.14	257	1.00319	257	39.2216	769	1.37771	769	2		769	352.243	1.02491	63.2015	1.37771	2	70.1041	38.6887	50
1281	317.918	1281	1.02026	1281	69.4037	129	1.19054	129	1		129	392.798	1.02629	135.852	1.19054	1	51.694	33.4326	25
769	352.243	769	1.02491	769	63.2015	1153	1.22046	1153	1		1153	267.721	1.01651	151.705	1.22046	1	57.2753	34.2729	25
129	392.798	129	1.02629	129	135.852	641	1.86191	641	1		641	466.074	1.02893	83.4145	1.86191	1	63.8696	52.286	25
1153	267.721	1153	1.01651	1153	151.705	385	1.56343	385	1		385	465.75	1.02367	55.7352	1.56343	1	43.5319	43.9041	25
641	466.074	641	1.02893	641	83.4145	897	2.61683	897	4		897	214.142	1.02617	118.484	2.61683	4	75.7844	73.4856	100
385	465.75	385	1.02367	385	55.7352	577	1.42326	577	3		577	490.611	1.04121	42.2159	1.42326	3	75.7317	39.9679	75
897	214.142	897	1.02617	897	118.484	321	1.58694	321	1		321	10.5726	1.04579	128.01	1.58694	1	34.8198	44.5643	25
577	490.611	577	1.04121	577	42.2159	833	2.11465	833	1		833	434.706	1.01286	66.1997	2.11465	1	79.7741	59.3834	25
321	10.5726	321	1.04579	321	128.01	193	1.46788	193	2		193	435.455	1.02266	32.9496	1.46788	2	1.71912	41.2209	50
833	434.706	833	1.01286	833	66.1997	1217	1.38367	1217	1		1217	318.389	1.02206	155.85	1.38367	1	70.6839	38.8561	25
193	435.455	193	1.02266	193	32.9496	705	1.48876	705	1		705	503.665	1.03756	77.4154	1.48876	1	70.8057	41.8072	25
1217	318.389	1217	1.02206	1217	155.85	449	1.04924	449	1		449	45.4296	1.01839	70.4886	1.04924	1	51.7706	29.4647	25
705	503.665	705	1.03756	705	77.4154	961	1.04924	961	1		961	330.755	1.02499	39.4669	1.04924	1	81.8967	29.4647	25
449	45.4296	449	1.01839	449	70.4886	33	1.42073	33	1		33	379.547	1.03899	83.7639	1.42073	1	7.38693	39.8968	25
961	330.755	961	1.02499	961	39.4669	1057	1.648	1057	2		1057	301.668	1.02009	55.1286	1.648	2	53.7813	46.279	50
33	379.547	33	1.03899	33	83.7639	545	1.33367	545	1		545	86.5246	1.02072	142.618	1.33367	1	61.715	37.452	25
1057	301.668	1057	1.02009	1057	55.1286	289	1.33367	289	1		289	0	1.01302	115.906	1.33367	1	49.0517	37.452	25
545	86.5246	545	1.02072	545	142.618	1313	1.4449	1313	1		1313	242.357	1.01643	68.0588	1.4449	1	14.069	40.5756	25
289	0	289	1.01302	289	115.906	801	1.32996	801	1		801	173.736	1.0085	156.229	1.32996	1	0	37.3478	25
1313	242.357	1313	1.01643	1313	68.0588	161	1.32996	161	1		161	461.595	1.05967	102.008	1.32996	1	39.4076	37.3478	25
801	173.736	801	1.0085	801	156.229	1185	1.08889	1185	1		1185	313.186	1.01794	61.3183	1.08889	1	28.2498	30.5781	25
161	461.595	161	1.05967	161	102.008	673	1.6679	673	2		673	410.75	1.00959	33.7984	1.6679	2	75.0561	46.8378	50
1185	313.186	1185	1.01794	1185	61.3183	417	1.03848	417	1		417	40.7422	1.0103	65.1223	1.03848	1	50.9246	29.1625	25
673	410.75	673	1.00959	673	33.7984	929	1.12946	929	1		929	198.063	1.01386	37.8342	1.12946	1	66.7886	31.7174	25
417	40.7422	417	1.0103	417	65.1223	97	1.91265	97	2		97	535.63	1.05037	115.416	1.91265	2	6.62475	53.7109	50
929	198.063	929	1.01386	929	37.8342	1121	2.16265	1121	2		1121	523.248	1.01614	45.9162	2.16265	2	32.2054	60.7314	50
97	535.63	97	1.05037	97	115.416	609	1.65813	609	2		609	457.865	1.02549	69.4003	1.65813	2	87.0943	46.5635	50
1121	523.248	1121	1.01614	1121	45.9162	353	1.4776	353	1		353	432.315	1.0276	64.4434	1.4776	1	85.081	41.4938	25
609	457.865	609	1.02549	609	69.4003	865	1.55645	865	1		865	525.744	1.04996	69.1192	1.55645	1	74.4496	43.7081	25
353	432.315	353	1.0276	353	64.4434	225	1.57029	225	1		225	332.277	1.02947	90.2444	1.57029	1	70.2951	44.0968	25
865	525.744	865	1.04996	865	69.1192	1249	1.87098	1249	1		1249	339.527	1.00718	65.7877	1.87098	1	85.4868	52.5407	25
225	332.277	225	1.02947	225	90.2444	737	0.994276	737	1		737	137.917	1.02697	85.5518	0.994276	1	54.0288	27.9212	25
1249	339.527	1249	1.00718	1249	65.7877	481	0.994276	481	1		481	482.577	1.02897	57.911	0.994276	1	55.2076	27.9212	25
737	137.917	737	1.02697	737	85.5518	993	2.37554	993	3		993	231.847	1.0094	42.7155	2.37554	3	22.4255	66.7097	75
481	482.577	481	1.02897	481	57.911	17	2.0714	17	1		17	361.825	1.01954	99.895	2.0714	1	78.4678	58.1689	25
993	231.847	993	1.0094	993	42.7155	1041	1.63468	1041	1		1041	449.457	1.06181	122.075	1.63468	1	37.6987	45.905	25
17	361.825	17	1.01954	17	99.895	529	1.58114	529	1		529	451.045	1.06585	245.408	1.58114	1	58.8333	44.4014	25
1041	449.457	1041	1.06181	1041	122.075	273	1.81152	273	3		273	399.803	1.0152	87.1362	1.81152	3	73.0824	50.871	75
529	451.045	529	1.06585	529	245.408	1297	1.97866	1297	3		1297	309.661	1.02157	86.2905	1.97866	3	73.3407	55.5646	75
273	399.803	273	1.0152	273	87.1362	785	1.60073	785	1		785	480.569	1.01372	65.7041	1.60073	1	65.0086	44.9516	25
1297	309.661	1297	1.02157	1297	86.2905	145	1.0178	145	1		145	326.032	1.04189	96.9133	1.0178	1	50.3514	28.5818	25
785	480.569	785	1.01372	785	65.7041	1169	1.10034	1169	1		1169	278.947	1.01951	96.0596	1.10034	1	78.1413	30.8997	25
145	326.032	145	1.04189	145	96.9133	657	1.26404	657	1		657	124.833	1.01869	117.327	1.26404	1	53.0133	35.4967	25
1169	278.947	1169	1.01951	1169	96.0596	401	1.35507	401	1		401	40.2308	1.02783	155.726	1.35507	1	45.3572	38.053	25
657	124.833	657	1.01869	657	117.327	913	1.16149	913	1		913	205.97	1.02704	141.466	1.16149	1	20.298	32.6169	25
401	40.2308	401	1.02783	401	155.726	81	1.58979	81	1		81	425.051	1.01545	40.7162	1.58979	1	6.54159	44.6444	25
913	205.97	913	1.02704	913	141.466	1105	1.052	1105	1		1105	265.101	1.01644	61.8054	1.052	1	33.4911	29.5422	25
81	425.051	81	1.01545	81	40.7162	593	1.45217	593	1		593	103.596	1.05493	176.611	1.45217	1	69.114	40.7797	25
1105	265.101	1105	1.01644	1105	61.8054	337	1.94654	337	1		337	12.1968	1.0296	137.653	1.94654	1	43.1059	54.6626	25
593	103.596	593	1.05493	593	176.611	849	1.79699	849	1		849	180.772	1.01899	142.497	1.79699	1	16.8449	50.4629	25
337	12.1968	337	1.0296	337	137.653	209	1.40122	209	1		209	425.567	1.03258	60.1223	1.40122	1	1.98322	39.3489	25
1361	0	1361	1.01629	1361	126.795	1233	1.6361	1233	1		1233	332.088	1.0209	135.829	1.6361	1	0	45.9448	25
849	180.772	849	1.01899	849	142.497	721	1.2074	721	1		721	131.408	1.01879	68.226	1.2074	1	29.3938	33.9061	25
209	425.567	209	1.03258	209	60.1223	465	1.43561	465	2		465	438.152	1.02627	104.79	1.43561	2	69.1979	40.3147	50
1233	332.088	1233	1.0209	1233	135.829	977	1.61172	977	1		977	217.729	1.01616	44.538	1.61172	1	53.998	45.2602	25
721	131.408	721	1.01879	721	68.226	49	1.92835	49	2		49	510.883	1.01809	34.6664	1.92835	2	21.3672	54.1518	50
465	438.152	465	1.02627	465	104.79	1073	1.69694	1073	3		1073	323.393	1.04799	72.8007	1.69694	3	71.2442	47.6533	75
977	217.729	977	1.01616	977	44.538	561	1.36414	561	1		561	84.4535	1.02343	125.694	1.36414	1	35.4031	38.3077	25
49	510.883	49	1.01809	49	34.6664	305	1.4818	305	2		305	437.154	1.02446	46.5889	1.4818	2	83.0704	41.6118	50
1073	323.393	1073	1.04799	1073	72.8007	1329	1.54831	1329	1		1329	465.937	1.06091	146.746	1.54831	1	52.5842	43.4795	25
561	84.4535	561	1.02343	561	125.694	817	2.49711	817	3		817	189.742	1.05517	145.76	2.49711	3	13.7323	70.1236	75
305	437.154	305	1.02446	305	46.5889	177	1.75559	177	1		177	587.151	1.03477	83.0045	1.75559	1	71.082	49.3003	25
1329	465.937	1329	1.06091	1329	146.746	1201	1.27173	1201	1		1201	322.213	1.03372	75.7775	1.27173	1	75.7621	35.7126	25
817	189.742	817	1.05517	817	145.76	689	1.0811	689	2		689	123.296	1.02049	43.0781	1.0811	2	30.8524	30.3594	50
177	587.151	177	1.03477	177	83.0045	433	1.23677	433	1		433	46.8321	1.02451	148.923	1.23677	1	95.4717	34.7309	25
1201	322.213	1201	1.03372	1201	75.7775	945	1.58243	945	1		945	505.417	1.043	84.6581	1.58243	1	52.3924	44.4377	25
689	123.296	689	1.02049	689	43.0781	113	1.12535	113	1		113	319.536	1.0099	75.172	1.12535	1	20.0481	31.602	25
433	46.8321	433	1.02451	433	148.923	1137	1.71293	1137	2		1137	323.216	1.02786	45.5452	1.71293	2	7.61498	48.1024	50
945	505.417	945	1.043	945	84.6581	625	1.37616	625	1		625	101.926	1.01394	72.7785	1.37616	1	82.1816	38.6452	25
113	319.536	113	1.0099	113	75.172	369	1.44933	369	1		369	21.2748	1.01748	74.2906	1.44933	1	51.9571	40.7	25
1137	323.216	1137	1.02786	1137	45.5452	881	1.9664	881	2		881	193.218	1.01558	65.5734	1.9664	2	52.5554	55.2203	50
625	101.926	625	1.01394	625	72.7785	241	1.96313	241	2		241	450.415	1.04499	65.6422	1.96313	2	16.5733	55.1285	50
369	21.2748	369	1.01748	369	74.2906	1265	1.97377	1265	1		1265	359.453	1.01899	100.465	1.97377	1	3.45932	55.4273	25
881	193.218	881	1.01558	881	65.5734	753	1.91564	753	1		753	149.112	1.02324	99.292	1.91564	1	31.4176	53.7949	25
241	450.415	241	1.04499	241	65.6422	497	2.38717	497	2		497	427.334	1.0178	83.3959	2.38717	2	73.2382	67.0363	50
1265	359.453	1265	1.01899	1265	100.465	1009	1.39006	1009	1		1009	375.54	1.05921	65.0752	1.39006	1	58.4476	39.0356	25
753	149.112	753	1.02324	753	99.292	9	1.7484	9	1		9	370.859	1.03775	117.1	1.7484	1	24.2459	49.0984	25
497	427.334	497	1.0178	497	83.3959	1033	1.33973	1033	1		1033	238.263	1.02141	94.2915	1.33973	1	69.4852	37.6222	25
1009	375.54	1009	1.05921	1009	65.0752	521	1.48037	521	2		521	442.908	1.04374	73.8957	1.48037	2	61.0634	41.5716	50
9	370.859	9	1.03775	9	117.1	265	2.06028	265	1		265	422.729	1.02474	52.2987	2.06028	1	60.3023	57.8566	25
1033	238.263	1033	1.02141	1033	94.2915	1289	2.06028	1289	1		1289	1000	#N/A	0.43268	2.06028	1	38.742	57.8566	25
521	442.908	521	1.04374	521	73.8957	777	1.16336	777	1		777	349.493	1.0414	148.536	1.16336	1	72.0176	32.6694	25
265	422.729	265	1.02474	265	52.2987	137	1.48381	137	1		137	449.723	1.04544	43.0718	1.48381	1	68.7364	41.6682	25
1289	1000			1289	0.43268	1161	1.68067	1161	2		1161	306.73	1.01641	65.6493	1.68067	2	162.602	47.1964	50
777	349.493	777	1.0414	777	148.536	649	1.51714	649	1		649	436.6	1.01174	68.0738	1.51714	1	56.8281	42.6042	25
137	449.723	137	1.04544	137	43.0718	393	1.11128	393	1		393	30.3615	1.00827	46.2344	1.11128	1	73.1257	31.2069	25
1161	306.73	1161	1.01641	1161	65.6493	905	2.4624	905	4		905	194.879	1.01794	71.3251	2.4624	4	49.8748	69.1489	100
649	436.6	649	1.01174	649	68.0738	73	1.40421	73	1		73	424.39	1.01112	49.8323	1.40421	1	70.9919	39.4329	25
393	30.3615	393	1.00827	393	46.2344	1097	1.82957	1097	2		1097	318.636	1.01258	47.7922	1.82957	2	4.93683	51.3778	50
905	194.879	905	1.01794	905	71.3251	585	1.23725	585	1		585	86.4305	1.01621	65.9254	1.23725	1	31.6876	34.7444	25
73	424.39	73	1.01112	73	49.8323	329	1.43678	329	1		329	7.18075	1.01377	62.3169	1.43678	1	69.0065	40.3475	25
1097	318.636	1097	1.01258	1097	47.7922	1353	1.52238	1353	2		1353	448.562	1.03337	68.0736	1.52238	2	51.8107	42.7514	50
585	86.4305	585	1.01621	585	65.9254	841	1.94563	841	2		841	389.832	1.02681	64.4016	1.94563	2	14.0537	54.637	50
329	7.18075	329	1.01377	329	62.3169	201	1.47425	201	2		201	339.892	1.03126	54.1034	1.47425	2	1.1676	41.3998	50
1353	448.562	1353	1.03337	1353	68.0736	1225	1.20062	1225	1		1225	292.847	1.03589	197.283	1.20062	1	72.9369	33.7157	25
841	389.832	841	1.02681	841	64.4016	713	1.43042	713	1		713	146.236	1.03353	154.151	1.43042	1	63.3873	40.1689	25
201	339.892	201	1.03126	201	54.1034	457	1.03663	457	1		457	343.504	1.09321	72.7688	1.03663	1	55.267	29.1106	25
1225	292.847	1225	1.03589	1225	197.283	969	2.05961	969	1		969	231.688	1.08	125.823	2.05961	1	47.6174	57.8378	25
713	146.236	713	1.03353	713	154.151	41	1.49369	41	1		41	381.222	1.03093	123.556	1.49369	1	23.7782	41.9457	25
457	343.504	457	1.09321	457	72.7688	1065	1.04672	1065	1		1065	256.165	1.01702	77.8691	1.04672	1	55.8543	29.3939	25
969	231.688	969	1.08	969	125.823	553	1.4725	553	2		553	69.3994	1.01319	75.4989	1.4725	2	37.6728	41.3506	50
41	381.222	41	1.03093	41	123.556	297	1.55041	297	1		297	351.635	1.01932	66.6756	1.55041	1	61.9873	43.5385	25
1065	256.165	1065	1.01702	1065	77.8691	1321	1.20405	1321	1		1321	595.766	1.03477	125.187	1.20405	1	41.6528	33.812	25
553	69.3994	553	1.01319	553	75.4989	809	1.68964	809	2		809	164.359	1.02812	65.3396	1.68964	2	11.2845	47.4483	50
297	351.635	297	1.01932	297	66.6756	169	2.00418	169	1		169	395.45	1.00599	104.044	2.00418	1	57.1764	56.2812	25
1321	595.766	1321	1.03477	1321	125.187	1193	0.974193	1193	1		1193	278.743	1.03705	92.3033	0.974193	1	96.8725	27.3572	25
809	164.359	809	1.02812	809	65.3396	681	1.65813	681	2		681	465.054	1.03855	47.2941	1.65813	2	26.725	46.5635	50
169	395.45	169	1.00599	169	104.044	425	1.10107	425	1		425	36.7637	1.02263	52.2929	1.10107	1	64.3008	30.9202	25
1193	278.743	1193	1.03705	1193	92.3033	937	2.09467	937	2		937	222.239	1.06627	127.614	2.09467	2	45.3241	58.8224	50
681	465.054	681	1.03855	681	47.2941	105	1.45655	105	1		105	575.988	1.02554	113.012	1.45655	1	75.6185	40.9027	25
425	36.7637	425	1.02263	425	52.2929	1129	1.07551	1129	1		1129	267.367	1.02468	96.0699	1.07551	1	5.97784	30.2024	25
937	222.239	937	1.06627	937	127.614	617	1.1803	617	1		617	102.729	1.01327	64.6137	1.1803	1	36.1364	33.1451	25
105	575.988	105	1.02554	105	113.012	361	1.83348	361	1		361	428.254	1.02031	91.2807	1.83348	1	93.6566	51.4876	25
1129	267.367	1129	1.02468	1129	96.0699	873	1.35986	873	2		873	381.626	1.05217	57.5905	1.35986	2	43.4743	38.1875	50
617	102.729	617	1.01327	617	64.6137	233	1.60815	233	1		233	543.191	1.00977	100.252	1.60815	1	16.7039	45.1599	25
361	428.254	361	1.02031	361	91.2807	1257	1.01337	1257	1		1257	298.913	1.01585	61.0765	1.01337	1	69.6348	28.4574	25
873	381.626	873	1.05217	873	57.5905	745	1.11586	745	1		745	156.645	1.01732	62.2152	1.11586	1	62.053	31.3355	25
233	543.191	233	1.00977	233	100.252	489	1.15738	489	1		489	253.807	1.0665	124.635	1.15738	1	88.3237	32.5015	25
1257	298.913	1257	1.01585	1257	61.0765	1001	1.30048	1001	1		1001	225.189	1.01704	129.33	1.30048	1	48.6037	36.52	25
745	156.645	745	1.01732	745	62.2152	25	1.56549	25	1		25	398.322	1.02739	97.2572	1.56549	1	25.4707	43.962	25
489	253.807	489	1.0665	489	124.635	1049	1.13633	1049	1		1049	239.471	1.01838	79.9154	1.13633	1	41.2694	31.9103	25
1001	225.189	1001	1.01704	1001	129.33	281	2.44041	281	1		281	385.201	1.02235	84.412	2.44041	1	36.6161	68.5314	25
25	398.322	25	1.02739	25	97.2572	1305	1.37686	1305	1		1305	111.958	1.03119	87.5774	1.37686	1	64.7678	38.6649	25
1049	239.471	1049	1.01838	1049	79.9154	793	1.35211	793	2		793	160.823	1.01874	63.3077	1.35211	2	38.9384	37.9698	50
281	385.201	281	1.02235	281	84.412	153	1.8967	153	1		153	397.812	1.06126	149.952	1.8967	1	62.6343	53.263	25
1305	111.958	1305	1.03119	1305	87.5774	1177	1.71098	1177	1		1177	347.973	1.01022	46.8597	1.71098	1	18.2046	48.0476	25
793	160.823	793	1.01874	793	63.3077	665	1.2281	665	1		665	365.949	1.03219	249.946	1.2281	1	26.1501	34.4874	25
153	397.812	153	1.06126	153	149.952	921	2.09878	921	3		921	212.868	1.0094	98.0321	2.09878	3	64.6849	58.9378	75
1177	347.973	1177	1.01022	1177	46.8597	89	1.53608	89	2		89	332.055	1.01228	71.0562	1.53608	2	56.581	43.1361	50
665	365.949	665	1.03219	665	249.946	1113	1.4768	1113	1		1113	341.765	1.01665	53.7084	1.4768	1	59.5039	41.4714	25
921	212.868	921	1.0094	921	98.0321	601	1.46429	601	1		601	88.3026	1.01512	88.0109	1.46429	1	34.6127	41.1201	25
89	332.055	89	1.01228	89	71.0562	345	1.80919	345	3		345	405.522	1.00253	20.7861	1.80919	3	53.9927	50.8055	75
1113	341.765	1113	1.01665	1113	53.7084	1369	0.93597	1369	2		1369	58.891	1.03479	99.9466	0.93597	2	55.5715	26.2838	50
601	88.3026	601	1.01512	601	88.0109	857	2.61683	857	4		857	204.787	1.01105	71.2576	2.61683	4	14.3581	73.4856	100
345	405.522	345	1.00253	345	20.7861	217	1.64313	217	1		217	407.839	1.01384	105.994	1.64313	1	65.9385	46.1422	25
1369	58.891	1369	1.03479	1369	99.9466	1241	1.42053	1241	2		1241	540.659	1.01761	40.098	1.42053	2	9.57577	39.8912	50
857	204.787	857	1.01105	857	71.2576	729	1.11116	729	1		729	149.338	1.02255	81.1489	1.11116	1	33.2987	31.2035	25
217	407.839	217	1.01384	217	105.994	473	1.01826	473	1		473	47.2911	1.01687	68.2771	1.01826	1	66.3153	28.5947	25
1241	540.659	1241	1.01761	1241	40.098	985	1.76866	985	1		985	512.406	1.02892	87.7651	1.76866	1	87.912	49.6674	25
729	149.338	729	1.02255	729	81.1489	57	1.71167	57	1		57	441.708	1.02118	91.5139	1.71167	1	24.2826	48.067	25
473	47.2911	473	1.01687	473	68.2771	1081	1.34366	1081	1		1081	266.578	1.01599	62.3955	1.34366	1	7.68961	37.7326	25
985	512.406	985	1.02892	985	87.7651	569	1.13184	569	1		569	95.7207	1.02023	96.8652	1.13184	1	83.318	31.7842	25
57	441.708	57	1.02118	57	91.5139	313	1.46274	313	2		313	425.849	1.01895	40.027	1.46274	2	71.8224	41.0765	50
1081	266.578	1081	1.01599	1081	62.3955	1337	1.24177	1337	1		1337	243.297	1.0635	121.797	1.24177	1	43.346	34.8713	25
569	95.7207	569	1.02023	569	96.8652	825	1.80919	825	3		825	398.767	1.01225	57.6586	1.80919	3	15.5643	50.8055	75
313	425.849	313	1.01895	313	40.027	185	1.33164	185	1		185	402.071	1.02722	167.378	1.33164	1	69.2437	37.395	25
1337	243.297	1337	1.0635	1337	121.797	1209	1.02816	1209	1		1209	282.445	1.01521	73.5292	1.02816	1	39.5605	28.8727	25
825	398.767	825	1.01225	825	57.6586	697	1.45394	697	2		697	554.079	1.00856	55.2647	1.45394	2	64.8402	40.8294	50
185	402.071	185	1.02722	185	167.378	441	0.772445	441	1		441	33.1372	1.01018	27.3204	0.772445	1	65.3774	21.6917	25
1209	282.445	1209	1.01521	1209	73.5292	953	1.68452	953	2		953	496.408	1.01882	98.6835	1.68452	2	45.926	47.3046	50
697	554.079	697	1.00856	697	55.2647	121	1.63331	121	1		121	408.551	1.01927	82.8889	1.63331	1	90.0941	45.8665	25
441	33.1372	441	1.01018	441	27.3204	1145	1.27967	1145	2		1145	288.667	1.02138	55.7665	1.27967	2	5.38816	35.9356	50
953	496.408	953	1.01882	953	98.6835	633	1.03982	633	1		633	103.677	1.0057	61.1315	1.03982	1	80.7167	29.2001	25
121	408.551	121	1.01927	121	82.8889	377	1.54539	377	1		377	14.1453	1.01973	222.716	1.54539	1	66.4311	43.3975	25
1145	288.667	1145	1.02138	1145	55.7665	889	1.10624	889	1		889	197.048	1.02049	55.4865	1.10624	1	46.9377	31.0653	25
633	103.677	633	1.0057	633	61.1315	249	1.683	249	2		249	414.914	1.02392	73.8003	1.683	2	16.858	47.2619	50
377	14.1453	377	1.01973	377	222.716	1273	1.19552	1273	1		1273	304.42	1.01829	69.2497	1.19552	1	2.30005	33.5725	25
889	197.048	889	1.02049	889	55.4865	761	1.54693	761	1		761	517.587	1.04861	59.5461	1.54693	1	32.0403	43.4408	25
249	414.914	249	1.02392	249	73.8003	1017	1.19924	1017	1		1017	227.996	1.01863	68.0582	1.19924	1	67.4657	33.677	25
1273	304.42	1273	1.01829	1273	69.2497	5	1.10431	5	1		5	326.769	1.0113	36.8742	1.10431	1	49.4992	31.0111	25
761	517.587	761	1.04861	761	59.5461	1029	1.66844	1029	2		1029	329.148	1.0184	61.5563	1.66844	2	84.1605	46.853	50
1017	227.996	1017	1.01863	1017	68.0582	517	1.48246	517	2		517	448.939	1.01425	83.8042	1.48246	2	37.0725	41.6303	50
5	326.769	5	1.0113	5	36.8742	1285	1.80559	1285	3		1285	376.611	1.00931	111.578	1.80559	3	53.1332	50.7044	75
1029	329.148	1029	1.0184	1029	61.5563	773	1.51601	773	2		773	161.583	1.02314	77.6347	1.51601	2	53.52	42.5725	50
517	448.939	517	1.01425	517	83.8042	133	1.06531	133	1		133	443.463	1.00562	33.8021	1.06531	1	72.9982	29.916	25
1285	376.611	1285	1.00931	1285	111.578	1157	1.60559	1157	1		1157	341.683	1.03452	79.0369	1.60559	1	61.2376	45.0881	25
773	161.583	773	1.02314	773	77.6347	645	1.39789	645	1		645	117.737	1.02554	178.113	1.39789	1	26.2737	39.2554	25
133	443.463	133	1.00562	133	33.8021	389	0.805407	389	1		389	35.1113	1.0107	42.1821	0.805407	1	72.1078	22.6174	25
1157	341.683	1157	1.03452	1157	79.0369	901	1.56577	901	2		901	364.154	1.05384	56.4358	1.56577	2	55.5582	43.9698	50
645	117.737	645	1.02554	645	178.113	69	1.86893	69	1		69	349.005	1.02184	98.9657	1.86893	1	19.1442	52.4831	25
389	35.1113	389	1.0107	389	42.1821	1093	1.8953	1093	2		1093	431.472	1.00668	22.1253	1.8953	2	5.70915	53.2237	50
901	364.154	901	1.05384	901	56.4358	581	2.51086	581	2		581	80.6417	1.03913	135.14	2.51086	2	59.212	70.5098	50
69	349.005	69	1.02184	69	98.9657	325	1.31358	325	1		325	0	1.03512	230.898	1.31358	1	56.7488	36.8878	25
1093	431.472	1093	1.00668	1093	22.1253	1349	1.31358	1349	1		1349	#N/A	#N/A	#N/A	1.31358	1	70.158	36.8878	25
581	80.6417	581	1.03913	581	135.14	837	1.53433	837	2		837	488.159	1.01146	51.3693	1.53433	2	13.1125	43.0869	50
325	0	325	1.03512	325	230.898	197	1.611	197	2		197	367.638	1.01298	42.881	1.611	2	0	45.24	50
837	488.159	837	1.01146	837	51.3693	1221	0.96415	1221	1		1221	288.094	1.01212	101.555	0.96415	1	79.3754	27.0752	25
197	367.638	197	1.01298	197	42.881	709	1.28663	709	1		709	143.808	1.01092	53.0624	1.28663	1	59.7785	36.131	25
1221	288.094	1221	1.01212	1221	101.555	453	1.68664	453	1		453	453.337	1.01861	79.3507	1.68664	1	46.8446	47.3641	25
709	143.808	709	1.01092	709	53.0624	965	1.12043	965	1		965	215.501	1.01941	169.556	1.12043	1	23.3834	31.4638	25
453	453.337	453	1.01861	453	79.3507	37	1.43762	37	1		37	370.783	1.05016	110.057	1.43762	1	73.7133	40.3711	25
965	215.501	965	1.01941	965	169.556	1061	1.24442	1061	1		1061	266.337	1.04878	81.3247	1.24442	1	35.0408	34.9457	25
37	370.783	37	1.05016	37	110.057	549	1.10029	549	1		549	84.6558	1.05655	102.92	1.10029	1	60.2899	30.8983	25
1061	266.337	1061	1.04878	1061	81.3247	293	1.10029	293	1		293	#N/A	#N/A	#N/A	1.10029	1	43.3068	30.8983	25
549	84.6558	549	1.05655	549	102.92	1317	1.10029	1317	1		1317	319.458	1.03082	65.2193	1.10029	1	13.7652	30.8983	25
1317	319.458	1317	1.03082	1317	65.2193	805	2.86888	805	4		805	179.861	1.02643	87.5243	2.86888	4	51.9444	80.5637	100
805	179.861	805	1.02643	805	87.5243	165	1.52451	165	1		165	426.748	1.01915	59.109	1.52451	1	29.2457	42.8112	25
165	426.748	165	1.01915	165	59.109	1189	1.38635	1189	1		1189	563.169	1.05948	155.363	1.38635	1	69.3899	38.9314	25
1189	563.169	1189	1.05948	1189	155.363	677	1.63669	677	2		677	475.724	1.0084	20.2817	1.63669	2	91.5722	45.9614	50
677	475.724	677	1.0084	677	20.2817	421	1.40146	421	1		421	340.702	1.0161	85.9524	1.40146	1	77.3535	39.3557	25
421	340.702	421	1.0161	421	85.9524	933	0.990729	933	1		933	206.378	1.03301	76.7041	0.990729	1	55.3987	27.8216	25
933	206.378	933	1.03301	933	76.7041	101	1.34249	101	1		101	324.554	1.03926	93.6352	1.34249	1	33.5574	37.6997	25
101	324.554	101	1.03926	101	93.6352	1125	1.23965	1125	1		1125	269.193	1.02508	112.185	1.23965	1	52.773	34.8118	25
1125	269.193	1125	1.02508	1125	112.185	613	1.25087	613	2		613	95.2559	1.02386	64.9031	1.25087	2	43.7712	35.1268	50
613	95.2559	613	1.02386	613	64.9031	357	1.46534	357	1		357	429.815	1.03622	134.327	1.46534	1	15.4888	41.1496	25
357	429.815	357	1.03622	357	134.327	869	1.12712	869	1		869	193.251	1.01002	84.0564	1.12712	1	69.8886	31.6517	25
869	193.251	869	1.01002	869	84.0564	229	1.61134	229	2		229	555.598	1.02922	139.301	1.61134	2	31.4229	45.2495	50
229	555.598	229	1.02922	229	139.301	1253	1.27339	1253	2		1253	309.618	1.02159	77.6968	1.27339	2	90.3411	35.7592	50
1253	309.618	1253	1.02159	1253	77.6968	741	1.19187	741	2		741	141.439	1.02379	56.603	1.19187	2	50.3444	33.47	50
741	141.439	741	1.02379	741	56.603	485	1.42821	485	1		485	59.7194	1.04587	83.2478	1.42821	1	22.9982	40.1069	25
485	59.7194	485	1.04587	485	83.2478	997	1.68452	997	2		997	500.078	1.00803	25.4362	1.68452	2	9.71047	47.3046	50
997	500.078	997	1.00803	997	25.4362	21	1.75514	21	2		21	406.974	1.00928	42.9328	1.75514	2	81.3135	49.2877	50
21	406.974	21	1.00928	21	42.9328	1045	1.5829	1045	1		1045	251.587	1.02413	76.4294	1.5829	1	66.1746	44.4509	25
1045	251.587	1045	1.02413	1045	76.4294	533	1.19014	533	1		533	78.3136	1.01739	123.032	1.19014	1	40.9085	33.4214	25
533	78.3136	533	1.01739	533	123.032	277	1.19014	277	1		277	#N/A	#N/A	#N/A	1.19014	1	12.7339	33.4214	25
1301	171.09	1301	1.03471	1301	100.291	1301	2.86888	1301	4		1301	171.09	1.03471	100.291	2.86888	4	27.8195	80.5637	100
789	161.546	789	1.01989	789	97.7055	789	1.51601	789	2		789	161.546	1.01989	97.7055	1.51601	2	26.2676	42.5725	50
149	415.655	149	1.01681	149	62.0789	149	1.94962	149	2		149	415.655	1.01681	62.0789	1.94962	2	67.5862	54.7491	50
1173	268.845	1173	1.01716	1173	86.9048	1173	1.12254	1173	1		1173	268.845	1.01716	86.9048	1.12254	1	43.7146	31.5231	25
661	496.558	661	1.03114	661	105.652	661	1.51666	661	1		661	496.558	1.03114	105.652	1.51666	1	80.7411	42.5907	25
405	32.0791	405	1.00976	405	63.8355	405	1.12066	405	1		405	32.0791	1.00976	63.8355	1.12066	1	5.21611	31.4703	25
917	355.295	917	1.01649	917	40.5095	917	1.4797	917	2		917	355.295	1.01649	40.5095	1.4797	2	57.7715	41.5528	50
85	343.184	85	1.03914	85	65.8148	85	1.47713	85	2		85	343.184	1.03914	65.8148	1.47713	2	55.8023	41.4806	50
1109	258.252	1109	1.01754	1109	121.077	1109	1.05302	1109	1		1109	258.252	1.01754	121.077	1.05302	1	41.9922	29.5708	25
597	350.174	597	1.02393	597	96.1368	597	1.19318	597	1		597	350.174	1.02393	96.1368	1.19318	1	56.9389	33.5068	25
341	11.0847	341	1.00902	341	52.7011	341	2.45511	341	1		341	11.0847	1.00902	52.7011	2.45511	1	1.80239	68.9442	25
1365	459.632	1365	1.0546	1365	57.1239	853	1.06548	853	1		853	182.649	1.01574	98.4243	1.06548	1	74.7369	29.9207	25
853	182.649	853	1.01574	853	98.4243	213	1.53137	213	1		213	413.328	1.03358	55.746	1.53137	1	29.699	43.0038	25
213	413.328	213	1.03358	213	55.746	1237	1.27561	1237	1		1237	297.631	1.01656	113.968	1.27561	1	67.2078	35.8216	25
1237	297.631	1237	1.01656	1237	113.968	725	1.73875	725	1		725	361.542	1.04478	64.0047	1.73875	1	48.3953	48.8274	25
725	361.542	725	1.04478	725	64.0047	469	1.05312	469	1		469	51.2275	1.01525	28.6133	1.05312	1	58.7873	29.5736	25
469	51.2275	469	1.01525	469	28.6133	981	1.33163	981	1		981	366.195	1.01925	138.084	1.33163	1	8.32967	37.3947	25
981	366.195	981	1.01925	981	138.084	53	1.33163	53	1		53	459.039	1.11008	55.298	1.33163	1	59.5439	37.3947	25
53	459.039	53	1.11008	53	55.298	1077	1.70939	1077	2		1077	291.032	1.03487	65.8628	1.70939	2	74.6405	48.003	50
1077	291.032	1077	1.03487	1077	65.8628	565	1.4725	565	2		565	77.0432	1.01267	56.0874	1.4725	2	47.3223	41.3506	50
565	77.0432	565	1.01267	565	56.0874	309	1.57126	309	2		309	427.711	1.02265	63.2201	1.57126	2	12.5273	44.124	50
309	427.711	309	1.02265	309	63.2201	821	2.459	821	2		821	185.64	1.02395	86.7424	2.459	2	69.5465	69.0534	50
821	185.64	821	1.02395	821	86.7424	181	1.54033	181	1		181	407.055	1.03214	90.3259	1.54033	1	30.1854	43.2554	25
181	407.055	181	1.03214	181	90.3259	1205	1.03255	1205	1		1205	283.874	1.04067	101.924	1.03255	1	66.1878	28.996	25
1205	283.874	1205	1.04067	1205	101.924	693	1.06628	693	1		693	136.922	1.02509	73.4693	1.06628	1	46.1584	29.9432	25
693	136.922	693	1.02509	693	73.4693	437	1.30298	437	1		437	336.932	1.01699	136.055	1.30298	1	22.2637	36.5902	25
437	336.932	437	1.01699	437	136.055	949	1.38622	949	1		949	209.864	1.01514	122.682	1.38622	1	54.7857	38.9277	25
949	209.864	949	1.01514	949	122.682	117	1.91585	117	2		117	417.909	1.01104	54.7061	1.91585	2	34.1242	53.8007	50
117	417.909	117	1.01104	117	54.7061	1141	2.06951	1141	2		1141	311.293	1.04349	58.1439	2.06951	2	67.9527	58.1158	50
1141	311.293	1141	1.04349	1141	58.1439	629	0.886596	629	1		629	111.822	1.024	57.5274	0.886596	1	50.6167	24.8973	25
629	111.822	629	1.024	629	57.5274	373	1.21894	373	1		373	23.0313	1.00607	63.8224	1.21894	1	18.1824	34.2302	25
373	23.0313	373	1.00607	373	63.8224	885	1.41038	885	2		885	192.263	1.017	63.0026	1.41038	2	3.74493	39.6062	50
885	192.263	885	1.017	885	63.0026	245	1.2875	245	1		245	307.678	1.01817	118.146	1.2875	1	31.2623	36.1555	25
245	307.678	245	1.01817	245	118.146	1269	1.43885	1269	2		1269	328.222	1.01757	54.2044	1.43885	2	50.0289	40.4057	50
1269	328.222	1269	1.01757	1269	54.2044	757	1.43885	757	2		757	524.436	1.02741	29.7207	1.43885	2	53.3694	40.4057	50
757	524.436	757	1.02741	757	29.7207	501	1.36864	501	2		501	380.465	1.01526	68.5277	1.36864	2	85.2741	38.434	50
501	380.465	501	1.01526	501	68.5277	1013	1.27223	1013	1		1013	362.651	1.02647	83.3783	1.27223	1	61.8642	35.7267	25
1013	362.651	1013	1.02647	1013	83.3783	13	1.36299	13	1		13	333.519	1.02131	82.565	1.36299	1	58.9676	38.2754	25
13	333.519	13	1.02131	13	82.565	1037	1.36299	1037	1		1037	321.533	1.06035	101.757	1.36299	1	54.2307	38.2754	25
1037	321.533	1037	1.06035	1037	101.757	525	1.08929	525	1		525	71.0567	1.02065	83.252	1.08929	1	52.2818	30.5894	25
525	71.0567	525	1.02065	525	83.252	269	1.24369	269	3		269	415.545	1.02421	64.4629	1.24369	3	11.5539	34.9252	75
269	415.545	269	1.02421	269	64.4629	1293	1.73375	1293	3		1293	299.419	1.05945	46.9637	1.73375	3	67.5683	48.687	75
1293	299.419	1293	1.05945	1293	46.9637	781	1.22268	781	1		781	163.943	1.00858	108.632	1.22268	1	48.686	34.3352	25
781	163.943	781	1.00858	781	108.632	141	1.63907	141	1		141	548.781	1.02134	274.567	1.63907	1	26.6574	46.0282	25
141	548.781	141	1.02134	141	274.567	1165	1.50413	1165	1		1165	530.655	1.0334	64.8995	1.50413	1	89.2327	42.2389	25
1165	530.655	1165	1.0334	1165	64.8995	653	1.41536	653	1		653	115.814	1.00619	80.2864	1.41536	1	86.2854	39.746	25
653	115.814	653	1.00619	653	80.2864	397	0.877806	397	1		397	35.3307	1.01377	40.3103	0.877806	1	18.8315	24.6505	25
397	35.3307	397	1.01377	397	40.3103	909	1.18053	909	1		909	195.873	1.00719	88.0266	1.18053	1	5.74483	33.1515	25
909	195.873	909	1.00719	909	88.0266	77	1.71476	77	2		77	447.784	1.02675	62.4109	1.71476	2	31.8493	48.1538	50
77	447.784	77	1.02675	77	62.4109	1101	1.73375	1101	3		1101	290.633	1.03189	52.4404	1.73375	3	72.8104	48.687	75
1101	290.633	1101	1.03189	1101	52.4404	589	1.4192	589	2		589	352.523	1.0251	55.24	1.4192	2	47.2574	39.8539	50
589	352.523	589	1.0251	589	55.24	1357	1.37036	1357	1		1357	200.124	1.01934	73.3937	1.37036	1	57.3208	38.4823	25
1357	200.124	1357	1.01934	1357	73.3937	845	2.0751	845	2		845	419.6	1.01021	54.9978	2.0751	2	32.5405	58.2728	50
845	419.6	845	1.01021	845	54.9978	205	1.44937	205	2		205	341.611	1.0397	71.3979	1.44937	2	68.2276	40.7011	50
205	341.611	205	1.0397	205	71.3979	1229	1.80786	1229	2		1229	361.763	1.01459	65.9992	1.80786	2	55.5465	50.7682	50
1229	361.763	1229	1.01459	1229	65.9992	717	1.54118	717	2		717	380.631	1.02755	80.191	1.54118	2	58.8233	43.2793	50
717	380.631	717	1.02755	717	80.191	461	1.48246	461	2		461	441.726	1.00841	69.1568	1.48246	2	61.8912	41.6303	50
461	441.726	461	1.00841	461	69.1568	973	1.48246	973	2		973	218.742	1.02922	115.797	1.48246	2	71.8254	41.6303	50
973	218.742	973	1.02922	973	115.797	45	1.32872	45	1		45	381.841	1.01842	119.744	1.32872	1	35.5678	37.313	25
45	381.841	45	1.01842	45	119.744	1069	1.34476	1069	1		1069	248.057	1.01753	78.7988	1.34476	1	62.088	37.7634	25
1069	248.057	1069	1.01753	1069	78.7988	557	1.6424	557	1		557	458.9	1.01551	61.3352	1.6424	1	40.3345	46.1217	25
557	458.9	557	1.01551	557	61.3352	301	1.44937	301	2		301	346.579	1.00442	26.1597	1.44937	2	74.6179	40.7011	50
301	346.579	301	1.00442	301	26.1597	1325	1.45394	1325	2		1325	555.628	1.0495	129.441	1.45394	2	56.3543	40.8294	50
1325	555.628	1325	1.0495	1325	129.441	813	0.917158	813	1		813	169.764	1.01145	56.5718	0.917158	1	90.346	25.7556	25
813	169.764	813	1.01145	813	56.5718	173	1.36988	173	1		173	586.72	1.0111	89.5314	1.36988	1	27.6039	38.4689	25
173	586.72	173	1.0111	173	89.5314	1197	2.42009	1197	2		1197	353.551	1.01479	35.5216	2.42009	2	95.4016	67.9608	50
1197	353.551	1197	1.01479	1197	35.5216	685	1.29694	685	1		685	144.535	1.06808	228.756	1.29694	1	57.488	36.4206	25
685	144.535	685	1.06808	685	228.756	429	0.762582	429	1		429	38.2655	1.00569	32.4486	0.762582	1	23.5016	21.4148	25
429	38.2655	429	1.00569	429	32.4486	941	2.76457	941	2		941	210.435	1.01468	116.216	2.76457	2	6.22203	77.6344	50
941	210.435	941	1.01468	941	116.216	109	1.19106	109	1		109	312.254	1.02349	124.577	1.19106	1	34.2171	33.4473	25
109	312.254	109	1.02349	109	124.577	1133	1.6281	1133	2		1133	381.061	1.03682	69.0207	1.6281	2	50.773	45.7202	50
1133	381.061	1133	1.03682	1133	69.0207	621	1.6281	621	2		621	#N/A	#N/A	#N/A	1.6281	2	61.9611	45.7202	50
365	17.6709	365	1.01597	365	146.757	365	1.80128	365	1		365	17.6709	1.01597	146.757	1.80128	1	2.87332	50.5834	25
877	206.274	877	1.01993	877	97.1402	877	2.61683	877	4		877	206.274	1.01993	97.1402	2.61683	4	33.5405	73.4856	100
237	307.482	237	1.02133	237	92.584	237	1.25106	237	1		237	307.482	1.02133	92.584	1.25106	1	49.9971	35.1322	25
1261	369.217	1261	1.01436	1261	25.4605	1261	2.27893	1261	2		1261	369.217	1.01436	25.4605	2.27893	2	60.0353	63.9967	50
749	161.679	749	1.05402	749	83.9371	749	1.07843	749	1		749	161.679	1.05402	83.9371	1.07843	1	26.2893	30.2844	25
493	386.095	493	1.03382	493	61.2953	493	1.40031	493	2		493	386.095	1.03382	61.2953	1.40031	2	62.7797	39.3234	50
1005	383.02	1005	1.02264	1005	36.5001	1005	1.80212	1005	3		1005	383.02	1.02264	36.5001	1.80212	3	62.2797	50.607	75
29	389.972	29	1.02323	29	69.6212	29	1.52784	29	1		29	389.972	1.02323	69.6212	1.52784	1	63.4101	42.9047	25
1053	545.123	1053	1.03768	1053	96.794	1053	1.26295	1053	1		1053	545.123	1.03768	96.794	1.26295	1	88.6379	35.4661	25
541	67.3795	541	1.01869	541	144.21	541	1.30639	541	1		541	67.3795	1.01869	144.21	1.30639	1	10.956	36.6859	25
285	463.182	285	1.06883	285	32.0384	285	1.79527	285	1		285	463.182	1.06883	32.0384	1.79527	1	75.3141	50.4146	25
1309	70.09	1309	1.02239	1309	71.9938	1309	2.85473	1309	2		1309	70.09	1.02239	71.9938	2.85473	2	11.3967	80.1663	50
797	164.12	797	1.04215	797	90.8917	797	1.2539	797	1		797	164.12	1.04215	90.8917	1.2539	1	26.6862	35.2119	25
157	395.733	157	1.01854	157	87.2401	157	1.31897	157	1		157	395.733	1.01854	87.2401	1.31897	1	64.3468	37.0392	25
1181	332.678	1181	1.01878	1181	58.8614	1181	1.7425	1181	2		1181	332.678	1.01878	58.8614	1.7425	2	54.094	48.9327	50
669	131.219	669	1.0292	669	58.0123	669	0.99148	669	1		669	131.219	1.0292	58.0123	0.99148	1	21.3364	27.8427	25
413	431.77	413	1.03697	413	73.4176	413	1.63697	413	1		413	431.77	1.03697	73.4176	1.63697	1	70.2065	45.9693	25
925	203.003	925	1.0251	925	116.237	925	2.16316	925	2		925	203.003	1.0251	116.237	2.16316	2	33.0086	60.7457	50
93	325.765	93	1.01189	93	60.7759	93	1.53608	93	2		93	325.765	1.01189	60.7759	1.53608	2	52.9699	43.1361	50
1117	322.054	1117	1.02022	1117	63.1037	1117	1.71013	1117	2		1117	322.054	1.02022	63.1037	1.71013	2	52.3665	48.0237	50
605	456.992	605	1.02091	605	55.6895	605	1.66853	605	1		605	456.992	1.02091	55.6895	1.66853	1	74.3076	46.8555	25
349	0	349	1.01385	349	121.744	349	1.66853	349	1		349	0	1.01385	121.744	1.66853	1	0	46.8555	25
861	196.453	861	1.01088	861	68.9618	861	2.14573	861	4		861	196.453	1.01088	68.9618	2.14573	4	31.9436	60.2562	100
221	331.902	221	1.02064	221	90.1161	221	1.22946	221	1		221	331.902	1.02064	90.1161	1.22946	1	53.9678	34.5256	25
1245	368.381	1245	1.01238	1245	49.2884	1245	1.80786	1245	2		1245	368.381	1.01238	49.2884	1.80786	2	59.8993	50.7682	50
733	472.621	733	1.02589	733	78.2117	733	1.51299	733	1		733	472.621	1.02589	78.2117	1.51299	1	76.8489	42.4877	25
477	237.168	477	1.07549	477	148.083	477	0.999316	477	1		477	237.168	1.07549	148.083	0.999316	1	38.5639	28.0627	25
989	411.985	989	1.00335	989	23.6988	989	2.23501	989	3		989	411.985	1.00335	23.6988	2.23501	3	66.9894	62.7634	75
61	242.23	61	1.02714	61	93.2922	61	0.958932	61	1		61	242.23	1.02714	93.2922	0.958932	1	39.387	26.9287	25
1085	252.372	1085	1.02567	1085	155.598	1085	1.19425	1085	1		1085	252.372	1.02567	155.598	1.19425	1	41.0361	33.5368	25
317	422.484	317	1.01905	317	37.3642	317	1.24369	317	3		317	422.484	1.01905	37.3642	1.24369	3	68.6966	34.9252	75
1341	127.959	1341	1.04609	1341	120.181	1341	1.26773	1341	1		1341	127.959	1.04609	120.181	1.26773	1	20.8063	35.6003	25
829	395.64	829	1.00992	829	47.1741	829	1.71908	829	2		829	395.64	1.00992	47.1741	1.71908	2	64.3317	48.2751	50
189	452.818	189	1.04265	189	23.778	189	1.75868	189	2		189	452.818	1.04265	23.778	1.75868	2	73.6289	49.3871	50
1213	346.901	1213	1.04374	1213	61.8686	1213	1.95779	1213	2		1213	346.901	1.04374	61.8686	1.95779	2	56.4067	54.9785	50
701	127.663	701	1.00935	701	41.4034	701	1.0811	701	2		701	127.663	1.00935	41.4034	1.0811	2	20.7582	30.3594	50
445	45.7596	445	1.01078	445	45.5063	445	0.967961	445	1		445	45.7596	1.01078	45.5063	0.967961	1	7.44059	27.1822	25
957	223.939	957	1.02296	957	107.828	957	2.37554	957	3		957	223.939	1.02296	107.828	2.37554	3	36.4128	66.7097	75
125	396.186	125	1.0143	125	75.4162	125	1.50775	125	1		125	396.186	1.0143	75.4162	1.50775	1	64.4205	42.3405	25
1149	550.232	1149	1.04874	1149	137.21	1149	1.42769	1149	1		1149	550.232	1.04874	137.21	1.42769	1	89.4686	40.0923	25
637	100.481	637	1.0221	637	73.243	637	1.33839	637	1		637	100.481	1.0221	73.243	1.33839	1	16.3384	37.5846	25
893	491.496	893	1.02256	893	73.2713	893	1.61609	893	1		893	491.496	1.02256	73.2713	1.61609	1	79.918	45.3829	25
253	396.565	253	1.02047	253	103.317	253	1.92898	253	1		253	396.565	1.02047	103.317	1.92898	1	64.4821	54.1695	25
1277	305.181	1277	1.05997	1277	112.802	1277	1.07645	1277	1		1277	305.181	1.05997	112.802	1.07645	1	49.6229	30.2288	25
765	502.305	765	1.03045	765	197.026	765	1.64412	765	1		765	502.305	1.03045	197.026	1.64412	1	81.6756	46.17	25
509	449.601	509	1.01648	509	94.653	509	1.71347	509	1		509	449.601	1.01648	94.653	1.71347	1	73.1059	48.1175	25
1021	550.555	1021	1.05033	1021	86.0761	1021	1.71347	1021	1		1021	550.555	1.05033	86.0761	1.71347	1	89.5211	48.1175	25
3	539.566	3	1.04141	3	90.8211	3	1.42041	3	2		3	539.566	1.04141	90.8211	1.42041	2	87.7343	39.8878	50
1027	233.518	1027	1.02849	1027	105.62	1027	1.16689	1027	1		1027	233.518	1.02849	105.62	1.16689	1	37.9704	32.7685	25
515	449.372	515	1.01793	515	88.514	515	1.71461	515	1		515	449.372	1.01793	88.514	1.71461	1	73.0686	48.1495	25
259	514.968	259	1.00545	259	31.3212	259	1.73615	259	2		259	514.968	1.00545	31.3212	1.73615	2	83.7346	48.7544	50
1283	307.055	1283	1.05787	1283	109.753	1283	0.977759	1283	1		1283	307.055	1.05787	109.753	0.977759	1	49.9276	27.4574	25
771	156.923	771	1.04948	771	97.848	771	1.67129	771	2		771	156.923	1.04948	97.848	1.67129	2	25.5159	46.933	50
131	449.613	131	1.05335	131	40.8487	131	1.26659	131	2		131	449.613	1.05335	40.8487	1.26659	2	73.1078	35.5683	50
643	461.261	643	1.02755	643	99.6017	643	1.57764	643	2		643	461.261	1.02755	99.6017	1.57764	2	75.0018	44.3032	50
387	382.063	387	1.01959	387	108.453	387	1.67878	387	1		387	382.063	1.01959	108.453	1.67878	1	62.1241	47.1434	25
899	372.792	899	1.02024	899	67.6973	899	1.51749	899	1		899	372.792	1.02024	67.6973	1.51749	1	60.6166	42.614	25
67	435.842	67	1.01823	67	36.9045	67	1.21984	67	1		67	435.842	1.01823	36.9045	1.21984	1	70.8686	34.2554	25
1091	336.957	1091	1.0401	1091	78.6207	1091	1.70754	1091	1		1091	336.957	1.0401	78.6207	1.70754	1	54.7898	47.951	25
579	354.645	579	1.03061	579	86.0146	579	1.6138	579	1		579	354.645	1.03061	86.0146	1.6138	1	57.6659	45.3186	25
835	494.13	835	1.02017	835	49.1394	835	1.49992	835	1		835	494.13	1.02017	49.1394	1.49992	1	80.3463	42.1206	25
195	431.696	195	1.00903	195	69.2032	195	1.42886	195	1		195	431.696	1.00903	69.2032	1.42886	1	70.1945	40.1251	25
1219	301.878	1219	1.01294	1219	87.1697	1219	1.19731	1219	1		1219	301.878	1.01294	87.1697	1.19731	1	49.0859	33.6228	25
707	141.569	707	1.02173	707	61.423	707	1.21257	707	1		707	141.569	1.02173	61.423	1.21257	1	23.0193	34.0513	25
451	453.014	451	1.01896	451	55.4496	451	1.46124	451	1		451	453.014	1.01896	55.4496	1.46124	1	73.6608	41.0344	25
963	216.992	963	1.00207	963	43.7712	963	1.00232	963	1		963	216.992	1.00207	43.7712	1.00232	1	35.2833	28.1471	25
35	569.288	35	1.03759	35	95.4843	35	1.91583	35	1		35	569.288	1.03759	95.4843	1.91583	1	92.5672	53.8002	25
1059	284.568	1059	1.0407	1059	79.5636	1059	1.54828	1059	2		1059	284.568	1.0407	79.5636	1.54828	2	46.2712	43.4787	50
547	84.9514	547	1.02945	547	148.874	547	1.27719	547	1		547	84.9514	1.02945	148.874	1.27719	1	13.8132	35.8659	25
291	447.782	291	1.03748	291	32.4587	291	1.19907	291	1		291	447.782	1.03748	32.4587	1.19907	1	72.8101	33.6722	25
1315	283.348	1315	1.02123	1315	47.2686	1315	1.19907	1315	1		1315	283.348	1.02123	47.2686	1.19907	1	46.0728	33.6722	25
803	177.642	803	1.0357	803	155.299	803	1.22032	803	1		803	177.642	1.0357	155.299	1.22032	1	28.8849	34.2689	25
163	395.399	163	1.0155	163	83.141	163	2.1658	163	2		163	395.399	1.0155	83.141	2.1658	2	64.2925	60.8198	50
1187	301.399	1187	1.02721	1187	110.038	1187	1.2028	1187	1		1187	301.399	1.02721	110.038	1.2028	1	49.008	33.7769	25
675	119.989	675	1.01569	675	65.5621	675	1.07601	675	1		675	119.989	1.01569	65.5621	1.07601	1	19.5104	30.2164	25
419	566.716	419	1.01667	419	99.4612	419	1.51457	419	1		419	566.716	1.01667	99.4612	1.51457	1	92.1489	42.532	25
931	205.82	931	1.01307	931	63.2689	931	1.24204	931	1		931	205.82	1.01307	63.2689	1.24204	1	33.4667	34.8789	25
99	320.491	99	1.01709	99	54.8317	99	1.56722	99	1		99	320.491	1.01709	54.8317	1.56722	1	52.1124	44.0105	25
1123	292.81	1123	1.03394	1123	70.9174	1123	1.50472	1123	1		1123	292.81	1.03394	70.9174	1.50472	1	47.6114	42.2554	25
611	451.155	611	1.01884	611	76.9383	611	1.43561	611	2		611	451.155	1.01884	76.9383	1.43561	2	73.3585	40.3147	50
355	19.9515	355	1.01784	355	93.1067	355	1.21955	355	1		355	19.9515	1.01784	93.1067	1.21955	1	3.24415	34.2473	25
867	185.787	867	1.01225	867	43.5095	867	1.04578	867	1		867	185.787	1.01225	43.5095	1.04578	1	30.2093	29.3675	25
227	600.962	227	1.04186	227	195.575	227	1.25241	227	1		227	600.962	1.04186	195.575	1.25241	1	97.7174	35.1701	25
1251	321.47	1251	1.01333	1251	85.8451	1251	1.27506	1251	1		1251	321.47	1.01333	85.8451	1.27506	1	52.2715	35.8061	25
739	139.819	739	1.03737	739	102.403	739	1.65069	739	1		739	139.819	1.03737	102.403	1.65069	1	22.7348	46.3545	25
483	476.84	483	1.03188	483	91.5967	483	1.49059	483	1		483	476.84	1.03188	91.5967	1.49059	1	77.535	41.8586	25
995	226.037	995	1.00807	995	61.4051	995	2.72113	995	4		995	226.037	1.00807	61.4051	2.72113	4	36.754	76.4146	100
19	409.017	19	1.01876	19	88.2775	19	1.91674	19	1		19	409.017	1.01876	88.2775	1.91674	1	66.5068	53.8257	25
1043	273.469	1043	1.02198	1043	54.6872	1043	1.91674	1043	1		1043	273.469	1.02198	54.6872	1.91674	1	44.4665	53.8257	25
531	72.319	531	1.02482	531	75.2122	531	1.3236	531	1		531	72.319	1.02482	75.2122	1.3236	1	11.7592	37.1692	25
275	503.264	275	1.02895	275	105.899	275	1.62136	275	1		275	503.264	1.02895	105.899	1.62136	1	81.8315	45.5309	25
1299	198.459	1299	1.04798	1299	79.1298	1299	2.49711	1299	3		1299	198.459	1.04798	79.1298	2.49711	3	32.2698	70.1236	75
787	167.935	787	1.02014	787	71.8418	787	2.86888	787	4		787	167.935	1.02014	71.8418	2.86888	4	27.3065	80.5637	100
147	406.2	147	1.02865	147	164.736	147	2.06122	147	1		147	406.2	1.02865	164.736	2.06122	1	66.0488	57.883	25
1171	275.637	1171	1.00874	1171	109.088	1171	1.01141	1171	1		1171	275.637	1.00874	109.088	1.01141	1	44.819	28.4023	25
659	503.319	659	1.03415	659	65.0278	659	1.41646	659	1		659	503.319	1.03415	65.0278	1.41646	1	81.8405	39.7769	25
403	439.592	403	1.00443	403	35.3133	403	1.88594	403	2		403	439.592	1.00443	35.3133	1.88594	2	71.4784	52.9608	50
915	214.039	915	1.01984	915	101.093	915	2.09467	915	2		915	214.039	1.01984	101.093	2.09467	2	34.8031	58.8224	50
83	350.253	83	1.03207	83	90.8203	83	1.68441	83	1		83	350.253	1.03207	90.8203	1.68441	1	56.9517	47.3015	25
1107	258.153	1107	1.01232	1107	144.146	1107	1.18632	1107	1		1107	258.153	1.01232	144.146	1.18632	1	41.9761	33.3141	25
595	110.113	595	1.03225	595	108.378	595	1.18632	595	1		595	110.113	1.03225	108.378	1.18632	1	17.9046	33.3141	25
339	436.015	339	1.01075	339	109.061	339	1.51367	339	1		339	436.015	1.01075	109.061	1.51367	1	70.8967	42.5068	25
1363	496.749	1363	1.06261	1363	41.0664	1363	1.42326	1363	3		1363	496.749	1.06261	41.0664	1.42326	3	80.7722	39.9679	75
851	179.102	851	1.02249	851	88.312	851	1.33435	851	1		851	179.102	1.02249	88.312	1.33435	1	29.1223	37.4711	25
211	414.65	211	1.02892	211	48.389	211	1.44977	211	1		211	414.65	1.02892	48.389	1.44977	1	67.4228	40.7123	25
1235	302.317	1235	1.00857	1235	68.0478	1235	1.19374	1235	1		1235	302.317	1.00857	68.0478	1.19374	1	49.1572	33.5225	25
723	368.085	723	1.01862	723	55.2532	723	1.60178	723	1		723	368.085	1.01862	55.2532	1.60178	1	59.8512	44.9811	25
467	445.381	467	1.03419	467	219.954	467	1.46337	467	1		467	445.381	1.03419	219.954	1.46337	1	72.4197	41.0942	25
979	217.958	979	1.01868	979	144.695	979	1.18841	979	1		979	217.958	1.01868	144.695	1.18841	1	35.4403	33.3728	25
51	521.67	51	1.01778	51	86.874	51	1.65882	51	1		51	521.67	1.01778	86.874	1.65882	1	84.8244	46.5829	25
1075	309.717	1075	1.03043	1075	67.39	1075	1.70731	1075	2		1075	309.717	1.03043	67.39	1.70731	2	50.3605	47.9445	50
307	0	307	1.02632	307	118.567	307	1.58169	307	1		307	0	1.02632	118.567	1.58169	1	0	44.4169	25
1331	402.343	1331	1.07387	1331	194.387	1331	1.33112	1331	1		1331	402.343	1.07387	194.387	1.33112	1	65.4216	37.3804	25
819	436.832	819	1.01067	819	94.0162	819	1.78786	819	1		819	436.832	1.01067	94.0162	1.78786	1	71.0296	50.2065	25
179	420.59	179	1.01439	179	48.1935	179	1.66931	179	2		179	420.59	1.01439	48.1935	1.66931	2	68.3886	46.8774	50
1203	523.944	1203	1.04017	1203	140.99	1203	1.67794	1203	1		1203	523.944	1.04017	140.99	1.67794	1	85.1941	47.1198	25
691	133.669	691	1.00931	691	34.7274	691	1.07961	691	1		691	133.669	1.00931	34.7274	1.07961	1	21.7348	30.3175	25
435	339.05	435	1.04806	435	71.4904	435	1.46951	435	1		435	339.05	1.04806	71.4904	1.46951	1	55.1301	41.2667	25
947	206.948	947	1.00547	947	45.6115	947	0.981693	947	1		947	206.948	1.00547	45.6115	0.981693	1	33.6501	27.5678	25
115	315.805	115	1.02161	115	116.204	115	1.02734	115	1		115	315.805	1.02161	116.204	1.02734	1	51.3504	28.8497	25
1139	316.75	1139	1.02203	1139	25.104	1139	1.66036	1139	3		1139	316.75	1.02203	25.104	1.66036	3	51.5041	46.6261	75
627	110.173	627	1.00465	627	41.7392	627	1.01005	627	1		627	110.173	1.00465	41.7392	1.01005	1	17.9143	28.3641	25
371	24.6425	371	1.03118	371	41.8353	371	0.954072	371	1		371	24.6425	1.03118	41.8353	0.954072	1	4.00691	26.7922	25
883	375.972	883	1.02575	883	77.8312	883	1.63774	883	2		883	375.972	1.02575	77.8312	1.63774	2	61.1337	45.9909	50
243	444.156	243	1.01236	243	45.5496	243	1.96313	243	2		243	444.156	1.01236	45.5496	1.96313	2	72.2205	55.1285	50
1267	335.941	1267	1.01925	1267	130.754	1267	1.72655	1267	1		1267	335.941	1.01925	130.754	1.72655	1	54.6246	48.4848	25
755	149.254	755	1.01494	755	56.5874	755	1.34734	755	1		755	149.254	1.01494	56.5874	1.34734	1	24.2689	37.8359	25
499	61.8436	499	1.01878	499	61.8435	499	1.32267	499	1		499	61.8436	1.01878	61.8435	1.32267	1	10.0559	37.1431	25
1011	363.189	1011	1.00769	1011	48.9788	1011	1.42308	1011	2		1011	363.189	1.00769	48.9788	1.42308	2	59.0551	39.9628	50
11	405.923	11	1.0214	11	54.8963	11	1.85349	11	2		11	405.923	1.0214	54.8963	1.85349	2	66.0037	52.0496	50
523	77.7904	523	1.06192	523	96.3352	1035	1.85349	1035	2		1035	#N/A	#N/A	#N/A	1.85349	2	12.6488	52.0496	50
267	422.071	267	1.02727	267	71.3917	523	1.0678	523	1		523	#N/A	#N/A	#N/A	1.0678	1	68.6294	29.9859	25
1291	297.466	1291	1.01104	1291	12.4627	267	1.46274	267	2		267	#N/A	#N/A	#N/A	1.46274	2	48.3685	41.0765	50
779	157.597	779	1.01044	779	32.0542	1291	1.73375	1291	3		1291	#N/A	#N/A	#N/A	1.73375	3	25.6255	48.687	75
139	439.445	139	1.02021	139	34.3633	779	0.997024	779	1		779	#N/A	#N/A	#N/A	0.997024	1	71.4545	27.9983	25
1163	307.253	1163	1.01759	1163	82.9308	139	1.22705	139	1		139	#N/A	#N/A	#N/A	1.22705	1	49.9598	34.4579	25
651	416.518	651	1.01431	651	95.9684	1163	1.45207	1163	1		1163	#N/A	#N/A	#N/A	1.45207	1	67.7265	40.7769	25
395	30.9426	395	1.01149	395	48.5507	651	2.00476	651	1		651	#N/A	#N/A	#N/A	2.00476	1	5.03132	56.2975	25
907	191.548	907	1.01281	907	63.3589	395	1.00712	395	1		395	#N/A	#N/A	#N/A	1.00712	1	31.146	28.2819	25
75	453.849	75	1.03249	75	46.4211	907	1.41038	907	2		907	#N/A	#N/A	#N/A	1.41038	2	73.7966	39.6062	50
1099	304.899	1099	1.02835	1099	76.6537	75	1.58989	75	2		75	#N/A	#N/A	#N/A	1.58989	2	49.5771	44.6472	50
587	96.6912	587	1.01268	587	98.1181	1099	1.88384	1099	3		1099	#N/A	#N/A	#N/A	1.88384	3	15.7221	52.9018	75
331	334.25	331	1.02357	331	113.811	587	1.29176	587	1		587	#N/A	#N/A	#N/A	1.29176	1	54.3496	36.2751	25
1355	449.365	1355	1.08239	1355	32.913	331	1.04538	331	1		331	#N/A	#N/A	#N/A	1.04538	1	73.0675	29.3563	25
843	391.003	843	1.0172	843	50.5898	1355	1.26659	1355	2		1355	#N/A	#N/A	#N/A	1.26659	2	63.5777	35.5683	50
203	439.834	203	1.0181	203	146.227	843	1.94563	843	2		843	#N/A	#N/A	#N/A	1.94563	2	71.5177	54.637	50
1227	378.51	1227	1.01624	1227	142.759	203	1.80664	203	1		203	#N/A	#N/A	#N/A	1.80664	1	61.5463	50.7339	25
715	149.41	715	1.02613	715	99.1808	1227	2.19862	1227	1		1227	#N/A	#N/A	#N/A	2.19862	1	24.2943	61.7415	25
459	439.602	459	1.02519	459	39.6571	715	1.14057	715	1		715	#N/A	#N/A	#N/A	1.14057	1	71.48	32.0294	25
971	232.179	971	1.01744	971	141.874	459	1.74727	459	2		459	#N/A	#N/A	#N/A	1.74727	2	37.7527	49.0667	50
43	374.263	43	1.03419	43	124.501	971	2.37554	971	3		971	#N/A	#N/A	#N/A	2.37554	3	60.8558	66.7097	75
1067	248.503	1067	1.01005	1067	65.5034	43	1.28358	43	1		43	#N/A	#N/A	#N/A	1.28358	1	40.407	36.0454	25
555	77.3011	555	1.00966	555	56.7062	1067	1.08773	1067	1		1067	#N/A	#N/A	#N/A	1.08773	1	12.5693	30.5455	25
1323	576.912	1323	1.02618	1323	105.396	555	1.19442	555	1		555	#N/A	#N/A	#N/A	1.19442	1	93.8068	33.5416	25
811	177.133	811	1.00876	811	117.549	299	1.19442	299	1		299	#N/A	#N/A	#N/A	1.19442	1	28.8021	33.5416	25
171	423.333	171	1.01723	171	71.7877	1323	1.29046	1323	1		1323	#N/A	#N/A	#N/A	1.29046	1	68.8346	36.2386	25
1195	364.044	1195	1.01538	1195	85.7836	811	1.01359	811	1		811	#N/A	#N/A	#N/A	1.01359	1	59.1941	28.4636	25
427	40.2187	427	1.01422	427	24.9478	171	1.54437	171	1		171	#N/A	#N/A	#N/A	1.54437	1	6.53963	43.3689	25
939	218.918	939	1.01643	939	100.825	1195	0.992698	1195	1		1195	#N/A	#N/A	#N/A	0.992698	1	35.5964	27.8769	25
107	313.496	107	1.01393	107	83.5424	683	0.992698	683	1		683	#N/A	#N/A	#N/A	0.992698	1	50.975	27.8769	25
1131	349.129	1131	1.01201	1131	50.2947	427	0.84196	427	1		427	#N/A	#N/A	#N/A	0.84196	1	56.7689	23.6439	25
363	433.145	363	1.05586	363	187.482	939	2.09878	939	3		939	#N/A	#N/A	#N/A	2.09878	3	70.4301	58.9378	75
875	390.546	875	1.01133	875	38.169	107	1.12105	107	1		107	#N/A	#N/A	#N/A	1.12105	1	63.5034	31.4812	25
235	462.089	235	1.03671	235	91.5065	1131	1.38538	1131	2		1131	#N/A	#N/A	#N/A	1.38538	2	75.1364	38.9041	50
1259	297.034	1259	1.02299	1259	177.085	363	1.41364	363	1		363	#N/A	#N/A	#N/A	1.41364	1	48.2982	39.6977	25
747	152.007	747	1.01986	747	138.965	875	1.62135	875	3		875	#N/A	#N/A	#N/A	1.62135	3	24.7166	45.5306	75
491	384.153	491	1.0474	491	78.0416	235	3.56101	235	1		235	#N/A	#N/A	#N/A	3.56101	1	62.4639	100	25
1003	397.428	1003	1.01353	1003	67.2634	1259	1.1724	1259	1		1259	#N/A	#N/A	#N/A	1.1724	1	64.6224	32.9232	25
27	395.858	27	1.01776	27	85.8064	747	1.13497	747	1		747	#N/A	#N/A	#N/A	1.13497	1	64.3672	31.8721	25
1051	243.326	1051	1.02094	1051	93.8733	491	1.75834	491	1		491	#N/A	#N/A	#N/A	1.75834	1	39.5652	49.3776	25
539	408.367	539	1.00956	539	69.771	1003	1.75283	1003	1		1003	#N/A	#N/A	#N/A	1.75283	1	66.4011	49.2228	25
1307	104.201	1307	1.01623	1307	107.1	27	1.47399	27	1		27	#N/A	#N/A	#N/A	1.47399	1	16.9433	41.3925	25
795	482.771	795	1.02797	795	96.9409	1051	1.15745	1051	1		1051	#N/A	#N/A	#N/A	1.15745	1	78.4993	32.5034	25
155	578.645	155	1.00796	155	168.383	539	1.81152	539	3		539	#N/A	#N/A	#N/A	1.81152	3	94.0886	50.871	75
1179	347.081	1179	1.03293	1179	89.1255	1307	1.81152	1307	3		1307	#N/A	#N/A	#N/A	1.81152	3	56.4359	50.871	75
667	128.139	667	1.01186	667	114.284	795	1.53263	795	1		795	#N/A	#N/A	#N/A	1.53263	1	20.8356	43.0392	25
411	343.601	411	1.03064	411	70.7117	155	1.47309	155	1		155	#N/A	#N/A	#N/A	1.47309	1	55.8701	41.3672	25
923	535.143	923	1.02666	923	53.9202	1179	2.00907	1179	1		1179	#N/A	#N/A	#N/A	2.00907	1	87.0151	56.4185	25
1115	330.464	1115	1.03166	1115	80.1348	667	1.21881	667	1		667	#N/A	#N/A	#N/A	1.21881	1	53.734	34.2265	25
603	460.516	603	1.01208	603	104.59	411	1.47868	411	1		411	#N/A	#N/A	#N/A	1.47868	1	74.8807	41.5242	25
347	420.947	347	1.02631	347	71.7573	923	1.47868	923	1		923	#N/A	#N/A	#N/A	1.47868	1	68.4467	41.5242	25
859	407.323	859	1.00438	859	37.8129	1115	2.07057	1115	1		1115	#N/A	#N/A	#N/A	2.07057	1	66.2314	58.1456	25
219	358.924	219	1.00996	219	87.3373	603	1.91674	603	1		603	#N/A	#N/A	#N/A	1.91674	1	58.3616	53.8257	25
1243	375.792	1243	1.0136	1243	95.753	347	2.38717	347	2		347	#N/A	#N/A	#N/A	2.38717	2	61.1044	67.0363	50
731	150.475	731	1.03018	731	112.18	859	2.00461	859	3		859	#N/A	#N/A	#N/A	2.00461	3	24.4675	56.2933	75
475	47.1227	475	1.01472	475	55.5034	219	1.74018	219	1		219	#N/A	#N/A	#N/A	1.74018	1	7.66223	48.8676	25
987	418.06	987	1.03256	987	82.9371	1243	1.63726	1243	1		1243	#N/A	#N/A	#N/A	1.63726	1	67.9772	45.9774	25
59	236.111	59	1.02576	59	68.1383	731	1.03825	731	1		731	#N/A	#N/A	#N/A	1.03825	1	38.392	29.1561	25
1083	257.391	1083	1.01597	1083	77.9442	475	1.0678	475	1		475	#N/A	#N/A	#N/A	1.0678	1	41.8522	29.9859	25
571	94.7283	571	1.03363	571	146.266	987	1.69104	987	1		987	#N/A	#N/A	#N/A	1.69104	1	15.403	47.4877	25
315	420.834	315	1.00393	315	21.0173	59	0.960287	59	1		59	#N/A	#N/A	#N/A	0.960287	1	68.4283	26.9667	25
1339	217.684	1339	1.06382	1339	183.942	1083	1.06156	1083	1		1083	#N/A	#N/A	#N/A	1.06156	1	35.3958	29.8106	25
827	173.075	827	1.02219	827	100.51	571	1.50463	571	1		571	#N/A	#N/A	#N/A	1.50463	1	28.1423	42.2529	25
187	435.295	187	1.03348	187	70.805	315	1.24369	315	3		315	#N/A	#N/A	#N/A	1.24369	3	70.7797	34.9252	75
1211	361.95	1211	1.00932	1211	93.5145	1339	1.2511	1339	1		1339	#N/A	#N/A	#N/A	1.2511	1	58.8537	35.1333	25
443	40.0846	443	1.01246	443	75.2301	827	1.61642	827	1		827	#N/A	#N/A	#N/A	1.61642	1	6.51782	45.3922	25
955	230.47	955	1.07274	955	130.567	187	1.76969	187	1		187	#N/A	#N/A	#N/A	1.76969	1	37.4748	49.6963	25
123	399.647	123	1.01101	123	53.2253	1211	1.78556	1211	2		1211	#N/A	#N/A	#N/A	1.78556	2	64.9833	50.142	50
1147	284.484	1147	1.01742	1147	147.476	443	1.09537	443	1		443	#N/A	#N/A	#N/A	1.09537	1	46.2576	30.7601	25
635	104.787	635	1.01897	635	66.184	955	1.09537	955	1		955	#N/A	#N/A	#N/A	1.09537	1	17.0385	30.7601	25
379	16.7706	379	1.01721	379	192.852	123	1.52973	123	2		123	#N/A	#N/A	#N/A	1.52973	2	2.72693	42.9578	50
891	199.013	891	1.03105	891	246.238	1147	1.20336	1147	1		1147	#N/A	#N/A	#N/A	1.20336	1	32.3598	33.7927	25
251	543.783	251	1.01875	251	86.4972	635	1.14229	635	2		635	#N/A	#N/A	#N/A	1.14229	2	88.42	32.0777	50
1275	305.077	1275	1.00572	1275	65.9075	379	1.67769	379	1		379	#N/A	#N/A	#N/A	1.67769	1	49.606	47.1128	25
763	159.798	763	1.0169	763	128.845	891	1.31291	891	1		891	#N/A	#N/A	#N/A	1.31291	1	25.9834	36.869	25
507	454.179	507	1.01305	507	55.5546	251	2.05953	251	1		251	#N/A	#N/A	#N/A	2.05953	1	73.8502	57.8356	25
1019	225.843	1019	1.00578	1019	51.3416	1275	1.24399	1275	1		1275	#N/A	#N/A	#N/A	1.24399	1	36.7224	34.9336	25
7	415.651	7	1.00795	7	64.3925	763	1.17157	763	1		763	#N/A	#N/A	#N/A	1.17157	1	67.5855	32.8999	25
1031	238.779	1031	1.01514	1031	123.01	507	1.66538	507	3		507	#N/A	#N/A	#N/A	1.66538	3	38.8259	46.7671	75
519	62.5881	519	1.0096	519	43.6974	1019	1.242	1019	1		1019	#N/A	#N/A	#N/A	1.242	1	10.1769	34.8777	25
263	428.772	263	1.01191	263	26.5563	7	1.79028	7	1		7	#N/A	#N/A	#N/A	1.79028	1	69.719	50.2745	25
1287	373.13	1287	1.04944	1287	102.898	1031	1.23766	1031	1		1031	#N/A	#N/A	#N/A	1.23766	1	60.6715	34.7559	25
775	154.524	775	1.03157	775	78.1643	519	1.02751	519	1		519	#N/A	#N/A	#N/A	1.02751	1	25.1259	28.8545	25
135	438.955	135	1.03046	135	32.9963	263	1.72048	263	2		263	#N/A	#N/A	#N/A	1.72048	2	71.3748	48.3144	50
1159	335.776	1159	1.03338	1159	34.6635	1287	1.7893	1287	1		1287	#N/A	#N/A	#N/A	1.7893	1	54.5977	50.247	25
647	120.479	647	1.0428	647	94.5814	775	1.30888	775	2		775	#N/A	#N/A	#N/A	1.30888	2	19.5901	36.7559	50
391	29.6516	391	1.01852	391	74.7817	135	1.31212	135	1		135	#N/A	#N/A	#N/A	1.31212	1	4.8214	36.8468	25
903	488.316	903	1.03041	903	122.462	1159	1.9597	1159	3		1159	#N/A	#N/A	#N/A	1.9597	3	79.401	55.0321	75
71	350.556	71	1.02188	71	26.7515	647	1.06491	647	1		647	#N/A	#N/A	#N/A	1.06491	1	57.001	29.9047	25
1095	328.334	1095	1.02759	1095	34.9441	391	1.16362	391	1		391	#N/A	#N/A	#N/A	1.16362	1	53.3876	32.6767	25
583	482.652	583	1.04446	583	232.453	903	1.29175	903	1		903	#N/A	#N/A	#N/A	1.29175	1	78.48	36.2748	25
327	459.828	327	1.04203	327	42.805	71	1.83616	71	2		71	#N/A	#N/A	#N/A	1.83616	2	74.7688	51.5629	50
1351	476.516	1351	1.04176	1351	61.1753	1095	1.69694	1095	3		1095	#N/A	#N/A	#N/A	1.69694	3	77.4823	47.6533	75
839	487.891	839	1.02072	839	72.6083	583	1.32762	583	1		583	#N/A	#N/A	#N/A	1.32762	1	79.3319	37.2821	25
199	359.959	199	1.00665	199	28.1449	327	1.34709	327	1		327	#N/A	#N/A	#N/A	1.34709	1	58.5299	37.8289	25
1223	285.389	1223	1.02375	1223	74.5582	1351	1.58143	1351	3		1351	#N/A	#N/A	#N/A	1.58143	3	46.4047	44.4096	75
711	143.097	711	1.01813	711	139.673	839	1.53433	839	2		839	#N/A	#N/A	#N/A	1.53433	2	23.2678	43.0869	50
967	540.739	967	1.03482	967	125.202	199	1.38964	199	2		199	#N/A	#N/A	#N/A	1.38964	2	87.925	39.0238	50
39	566.276	39	1.02026	39	94.1283	1223	1.14338	1223	1		1223	#N/A	#N/A	#N/A	1.14338	1	92.0774	32.1083	25
1063	258.684	1063	1.0471	1063	53.0116	711	1.23827	711	1		711	#N/A	#N/A	#N/A	1.23827	1	42.0624	34.773	25
551	370.635	551	1.02591	551	103.6	455	0.93597	455	2		455	#N/A	#N/A	#N/A	0.93597	2	60.2659	26.2838	50
295	362.235	295	1.02882	295	88.9172	967	1.43253	967	1		967	#N/A	#N/A	#N/A	1.43253	1	58.9	40.2282	25
1319	329.69	1319	1.01672	1319	72.1168	39	1.60928	39	2		39	#N/A	#N/A	#N/A	1.60928	2	53.6081	45.1917	50
807	174.763	807	1.04027	807	95.6002	1063	1.405	1063	1		1063	#N/A	#N/A	#N/A	1.405	1	28.4167	39.4551	25
167	449.703	167	1.03839	167	104.372	551	1.47994	551	1		551	#N/A	#N/A	#N/A	1.47994	1	73.1224	41.5596	25
1191	273.947	1191	1.02392	1191	73.2969	295	1.71791	295	1		295	#N/A	#N/A	#N/A	1.71791	1	44.5442	48.2422	25
679	128.098	679	1.01813	679	78.5226	1319	1.71791	1319	1		1319	#N/A	#N/A	#N/A	1.71791	1	20.8289	48.2422	25
423	27.6942	423	1.00437	423	32.8163	807	2.07892	807	2		807	#N/A	#N/A	#N/A	2.07892	2	4.50312	58.3801	50
935	203.157	935	1.01261	935	61.8982	167	1.44307	167	1		167	#N/A	#N/A	#N/A	1.44307	1	33.0337	40.5242	25
103	320.973	103	1.01952	103	84.8497	1191	1.13139	1191	1		1191	#N/A	#N/A	#N/A	1.13139	1	52.1907	31.7716	25
1127	518.114	1127	1.03194	1127	148.456	679	1.1039	679	1		679	#N/A	#N/A	#N/A	1.1039	1	84.2462	30.9996	25
615	94.6834	615	1.02722	615	32.1467	423	0.798612	423	1		423	#N/A	#N/A	#N/A	0.798612	1	15.3957	22.4266	25
359	400.695	359	1.00589	359	50.1659	935	1.13275	935	1		935	#N/A	#N/A	#N/A	1.13275	1	65.1537	31.8098	25
871	205.533	871	1.07407	871	81.6044	103	1.2545	103	1		103	#N/A	#N/A	#N/A	1.2545	1	33.42	35.2288	25
231	332.541	231	1.04033	231	291.146	1127	1.88537	1127	1		1127	#N/A	#N/A	#N/A	1.88537	1	54.0717	52.9448	25
1255	297.016	1255	1.01187	1255	51.1042	615	1.49918	615	2		615	#N/A	#N/A	#N/A	1.49918	2	48.2953	42.0999	50
743	147.755	743	1.01853	743	68.6964	359	1.71908	359	2		359	#N/A	#N/A	#N/A	1.71908	2	24.0252	48.2751	50
487	61.4774	487	1.01243	487	76.9651	871	2.49711	871	3		871	#N/A	#N/A	#N/A	2.49711	3	9.99633	70.1236	75
999	495.952	999	1.0224	999	92.6473	231	1.25895	231	1		231	#N/A	#N/A	#N/A	1.25895	1	80.6426	35.3537	25
23	405.809	23	1.0117	23	30.0837	1255	0.999148	1255	1		1255	#N/A	#N/A	#N/A	0.999148	1	65.9852	28.058	25
1047	238.937	1047	1.00775	1047	83.5115	743	1.15757	743	1		743	#N/A	#N/A	#N/A	1.15757	1	38.8515	32.5068	25
535	72.437	535	1.02358	535	76.2414	487	1.25638	487	1		487	#N/A	#N/A	#N/A	1.25638	1	11.7784	35.2816	25
279	0	279	1.03044	279	225.419	999	2.0052	999	1		999	#N/A	#N/A	#N/A	2.0052	1	0	56.3099	25
1303	128.657	1303	1.08469	1303	85.0889	23	1.75514	23	2		23	#N/A	#N/A	#N/A	1.75514	2	20.9198	49.2877	50
791	483.535	791	1.01344	791	34.9732	1047	1.42427	1047	1		1047	#N/A	#N/A	#N/A	1.42427	1	78.6236	39.9962	25
151	591.447	151	1.01331	151	251.981	535	1.31577	535	1		535	#N/A	#N/A	#N/A	1.31577	1	96.1702	36.9493	25
663	115.059	663	1.01442	663	58.7158	279	1.86138	279	1		279	#N/A	#N/A	#N/A	1.86138	1	18.7088	52.2711	25
407	439.743	407	1.02821	407	54.1326	1303	1.73287	1303	2		1303	#N/A	#N/A	#N/A	1.73287	2	71.5029	48.6623	50
919	210.142	919	1.01831	919	58.1768	791	1.62713	791	2		791	#N/A	#N/A	#N/A	1.62713	2	34.1694	45.6929	50
87	414.74	87	1.0197	87	78.6224	151	1.19798	151	1		151	#N/A	#N/A	#N/A	1.19798	1	67.4374	33.6416	25
599	469.157	599	1.0198	599	87.2732	663	0.949742	663	1		663	#N/A	#N/A	#N/A	0.949742	1	76.2857	26.6706	25
343	444.451	343	1.02832	343	96.311	407	1.74727	407	2		407	#N/A	#N/A	#N/A	1.74727	2	72.2685	49.0667	50
855	193.724	855	1.04723	855	188.279	919	2.09878	919	3		919	#N/A	#N/A	#N/A	2.09878	3	31.4998	58.9378	75
215	408.514	215	1.0261	215	67.2194	87	1.44134	87	1		87	#N/A	#N/A	#N/A	1.44134	1	66.425	40.4756	25
1239	291.862	1239	1.01067	1239	66.2993	599	1.4026	599	1		599	#N/A	#N/A	#N/A	1.4026	1	47.4572	39.3877	25
727	148.348	727	1.01463	727	117.584	343	1.47195	343	1		343	#N/A	#N/A	#N/A	1.47195	1	24.1216	41.3352	25
471	44.4791	471	1.01072	471	65.3292	855	1.2502	855	1		855	#N/A	#N/A	#N/A	1.2502	1	7.23237	35.108	25
983	223.907	983	1.03221	983	135.328	215	1.36146	215	2		215	#N/A	#N/A	#N/A	1.36146	2	36.4076	38.2324	50
55	446.87	55	1.03899	55	66.0793	1239	1.04266	1239	1		1239	#N/A	#N/A	#N/A	1.04266	1	72.6618	29.2799	25
1079	273.622	1079	1.04034	1079	98.8097	727	1.30638	727	1		727	#N/A	#N/A	#N/A	1.30638	1	44.4914	36.6857	25
567	91.7872	567	1.01595	567	65.6188	471	1.07412	471	1		471	#N/A	#N/A	#N/A	1.07412	1	14.9247	30.1634	25
311	338.799	311	1.00552	311	31.592	983	1.06915	983	1		983	#N/A	#N/A	#N/A	1.06915	1	55.0893	30.0238	25
1335	315.138	1335	1.0445	1335	102.26	55	1.52238	55	2		55	#N/A	#N/A	#N/A	1.52238	2	51.242	42.7514	50
823	434.99	823	1.02236	823	42.3488	1079	1.26018	1079	1		1079	#N/A	#N/A	#N/A	1.26018	1	70.7301	35.3883	25
183	402.158	183	1.0102	183	55.9012	567	1.19934	567	1		567	#N/A	#N/A	#N/A	1.19934	1	65.3915	33.6798	25
1207	286.48	1207	1.02461	1207	235.628	311	1.14858	311	1		311	#N/A	#N/A	#N/A	1.14858	1	46.5821	32.2543	25
695	137.983	695	1.02874	695	61.3119	1335	1.17619	1335	1		1335	#N/A	#N/A	#N/A	1.17619	1	22.4363	33.0297	25
439	29.8694	439	1.01801	439	95.9488	823	1.73237	823	2		823	#N/A	#N/A	#N/A	1.73237	2	4.85681	48.6483	50
951	208.984	951	1.01981	951	68.5327	183	1.36146	183	2		183	#N/A	#N/A	#N/A	1.36146	2	33.9811	38.2324	50
119	407.661	119	1.01908	119	63.5419	1207	1.29371	1207	1		1207	#N/A	#N/A	#N/A	1.29371	1	66.2863	36.3299	25
1143	300.855	1143	1.02763	1143	46.4877	695	1.13805	695	1		695	#N/A	#N/A	#N/A	1.13805	1	48.9195	31.9586	25
631	118.868	631	1.02963	631	194.968	439	1.21181	439	1		439	#N/A	#N/A	#N/A	1.21181	1	19.3281	34.03	25
375	396.178	375	1.0112	375	55.9668	951	0.99685	951	1		951	#N/A	#N/A	#N/A	0.99685	1	64.4192	27.9935	25
887	188.849	887	1.01805	887	50.6254	119	1.63117	119	2		119	#N/A	#N/A	#N/A	1.63117	2	30.7072	45.8064	50
247	509.802	247	1.0051	247	15.5226	1143	1.68067	1143	2		1143	#N/A	#N/A	#N/A	1.68067	2	82.8946	47.1964	50
1271	312.753	1271	1.02455	1271	77.7551	631	1.45311	631	1		631	#N/A	#N/A	#N/A	1.45311	1	50.8541	40.8061	25
759	516.766	759	1.0685	759	53.8405	375	1.59057	375	2		375	#N/A	#N/A	#N/A	1.59057	2	84.027	44.6663	50
503	371.903	503	1.05048	503	109.894	887	1.32409	887	1		887	#N/A	#N/A	#N/A	1.32409	1	60.472	37.183	25
1015	229.555	1015	1.04305	1015	108.895	247	1.92835	247	2		247	#N/A	#N/A	#N/A	1.92835	2	37.326	54.1518	50
15	373.687	15	1.02455	15	107.817	1271	1.35737	1271	1		1271	#N/A	#N/A	#N/A	1.35737	1	60.7621	38.1176	25
1039	299.908	1039	1.06167	1039	30.7985	759	1.35737	759	1		759	#N/A	#N/A	#N/A	1.35737	1	48.7655	38.1176	25
527	72.2421	527	1.03974	527	93.4745	503	1.49431	503	1		503	#N/A	#N/A	#N/A	1.49431	1	11.7467	41.9631	25
271	406.374	271	1.01657	271	115.917	1015	2.72113	1015	4		1015	#N/A	#N/A	#N/A	2.72113	4	66.0771	76.4146	100
1295	461.715	1295	1.00892	1295	26.2701	15	1.91519	15	2		15	#N/A	#N/A	#N/A	1.91519	2	75.0756	53.7822	50
783	173.152	783	1.04045	783	181.676	1039	1.97866	1039	3		1039	#N/A	#N/A	#N/A	1.97866	3	28.1548	55.5646	75
143	319.572	143	1.07438	143	165.907	527	1.14824	527	1		527	#N/A	#N/A	#N/A	1.14824	1	51.9629	32.2448	25
1167	281.527	1167	1.03714	1167	101.852	271	2.42302	271	1		271	#N/A	#N/A	#N/A	2.42302	1	45.7767	68.0431	25
655	119.629	655	1.01333	655	47.1019	1295	1.66538	1295	3		1295	#N/A	#N/A	#N/A	1.66538	3	19.4519	46.7671	75
399	443.929	399	1.03928	399	75.7516	783	1.35375	783	1		783	#N/A	#N/A	#N/A	1.35375	1	72.1836	38.0159	25
911	201.604	911	1.03513	911	167.183	143	1.26174	143	1		143	#N/A	#N/A	#N/A	1.26174	1	32.7811	35.4321	25
79	354.602	79	1.03174	79	43.4867	1167	1.13916	1167	1		1167	#N/A	#N/A	#N/A	1.13916	1	57.6589	31.9898	25
1103	284.341	1103	1.03149	1103	77.9766	655	0.964726	655	1		655	#N/A	#N/A	#N/A	0.964726	1	46.2343	27.0914	25
591	96.288	591	1.02423	591	85.919	399	1.60939	399	1		399	#N/A	#N/A	#N/A	1.60939	1	15.6566	45.1948	25
335	453.869	335	1.02787	335	72.8436	911	1.15074	911	1		911	#N/A	#N/A	#N/A	1.15074	1	73.7998	32.315	25
1359	0	1359	1.03263	1359	126.951	79	1.38964	79	2		79	#N/A	#N/A	#N/A	1.38964	2	0	39.0238	50
847	491.213	847	1.02511	847	109.839	1103	1.31464	1103	1		1103	#N/A	#N/A	#N/A	1.31464	1	79.872	36.9176	25
207	422.7	207	1.01637	207	79.3168	591	1.07286	591	1		591	#N/A	#N/A	#N/A	1.07286	1	68.7317	30.128	25
1231	349.271	1231	1.05583	1231	66.9532	335	1.44572	335	2		335	#N/A	#N/A	#N/A	1.44572	2	56.792	40.5986	50
719	368.196	719	1.00516	719	63.2742	847	1.56851	847	1		847	#N/A	#N/A	#N/A	1.56851	1	59.8693	44.0468	25
463	48.8891	463	1.01339	463	56.5001	207	1.72048	207	2		207	#N/A	#N/A	#N/A	1.72048	2	7.94945	48.3144	50
975	213.797	975	1.0115	975	36.7231	1231	1.58104	1231	2		1231	#N/A	#N/A	#N/A	1.58104	2	34.7637	44.3986	50
47	389.275	47	1.06962	47	144.378	719	1.39007	719	1		719	#N/A	#N/A	#N/A	1.39007	1	63.2967	39.0358	25
1071	520.577	1071	1.00624	1071	21.4198	463	1.20577	463	1		463	#N/A	#N/A	#N/A	1.20577	1	84.6467	33.8603	25
559	84.0897	559	1.01789	559	111.092	975	1.31616	975	2		975	#N/A	#N/A	#N/A	1.31616	2	13.6731	36.9603	50
303	0	303	1.03356	303	79.3928	47	1.15922	47	1		47	#N/A	#N/A	#N/A	1.15922	1	0	32.5531	25
1327	488.083	1327	1.0592	1327	173.673	1071	1.60726	1071	3		1071	#N/A	#N/A	#N/A	1.60726	3	79.3631	45.1349	75
815	174.753	815	1.04347	815	73.0096	559	1.13796	559	1		559	#N/A	#N/A	#N/A	1.13796	1	28.4151	31.9561	25
175	580.024	175	1.05357	175	146.265	303	1.13796	303	1		303	#N/A	#N/A	#N/A	1.13796	1	94.3128	31.9561	25
1199	338.186	1199	1.02511	1199	64.0812	1327	1.60977	1327	1		1327	#N/A	#N/A	#N/A	1.60977	1	54.9896	45.2054	25
687	413.126	687	1.01415	687	81.5987	815	0.918196	815	1		815	#N/A	#N/A	#N/A	0.918196	1	67.175	25.7847	25
431	41.6822	431	1.01545	431	67.2705	175	1.47952	175	1		175	#N/A	#N/A	#N/A	1.47952	1	6.77759	41.5478	25
111	321.737	111	1.02664	111	109.548	1199	1.49529	1199	2		1199	#N/A	#N/A	#N/A	1.49529	2	52.315	41.9906	50
1135	328.28	1135	1.01917	1135	37.837	687	2.0751	687	2		687	#N/A	#N/A	#N/A	2.0751	2	53.3789	58.2728	50
623	117.094	623	1.04132	623	126.934	431	1.03942	431	1		431	#N/A	#N/A	#N/A	1.03942	1	19.0397	29.1889	25
367	18.9008	367	1.02364	367	89.4725	943	1.03942	943	1		943	#N/A	#N/A	#N/A	1.03942	1	3.0733	29.1889	25
879	201.395	879	1.01298	879	80.8287	111	1.29283	111	1		111	#N/A	#N/A	#N/A	1.29283	1	32.7472	36.3051	25
239	240.789	239	1.02798	239	111.975	1135	1.71013	1135	2		1135	#N/A	#N/A	#N/A	1.71013	2	39.1527	48.0237	50
1263	364.189	1263	1.02524	1263	84.3187	623	1.16266	623	1		623	#N/A	#N/A	#N/A	1.16266	1	59.2177	32.6497	25
751	348.499	751	1.01778	751	72.309	367	1.71177	367	1		367	#N/A	#N/A	#N/A	1.71177	1	56.6665	48.0698	25
495	54.0509	495	1.017	495	79.6126	879	2.14573	879	4		879	#N/A	#N/A	#N/A	2.14573	4	8.78876	60.2562	100
1007	381.158	1007	1.02012	1007	44.6028	239	1.19622	239	1		239	#N/A	#N/A	#N/A	1.19622	1	61.9769	33.5922	25
31	386.286	31	1.02307	31	102.872	1263	2.23697	1263	1		1263	#N/A	#N/A	#N/A	2.23697	1	62.8107	62.8184	25
1055	313.197	1055	1.02339	1055	89.1751	751	1.23439	751	2		751	#N/A	#N/A	#N/A	1.23439	2	50.9263	34.664	50
543	78.5689	543	1.03793	543	102.181	495	1.01947	495	1		495	#N/A	#N/A	#N/A	1.01947	1	12.7754	28.6287	25
1311	167.321	1311	1.01815	1311	86.1323	1007	1.6281	1007	2		1007	#N/A	#N/A	#N/A	1.6281	2	27.2067	45.7202	50
799	166.404	799	1.02379	799	72.3938	31	1.46512	31	1		31	#N/A	#N/A	#N/A	1.46512	1	27.0576	41.1434	25
159	402.981	159	1.02428	159	35.4867	1055	2.26617	1055	1		1055	#N/A	#N/A	#N/A	2.26617	1	65.5254	63.6384	25
1183	316.04	1183	1.04272	1183	64.7067	543	1.40502	543	1		543	#N/A	#N/A	#N/A	1.40502	1	51.3886	39.4557	25
671	597.186	671	1.06813	671	326.241	1311	1.12694	1311	2		1311	#N/A	#N/A	#N/A	1.12694	2	97.1034	31.6466	50
415	30.2012	415	1.02062	415	43.2846	799	0.972844	799	1		799	#N/A	#N/A	#N/A	0.972844	1	4.91076	27.3193	25
95	324.47	95	1.0154	95	69.5935	159	2.1658	159	2		159	#N/A	#N/A	#N/A	2.1658	2	52.7593	60.8198	50
1119	531.634	1119	1.02233	1119	128.325	1183	1.99454	1183	2		1183	#N/A	#N/A	#N/A	1.99454	2	86.4446	56.0105	50
607	451.45	607	1.00673	607	28.3897	671	1.31396	671	3		671	#N/A	#N/A	#N/A	1.31396	3	73.4065	36.8985	75
351	0	351	1.02411	351	147.126	415	1.14763	415	1		415	#N/A	#N/A	#N/A	1.14763	1	0	32.2277	25
863	183.524	863	1.01315	863	87.4182	927	1.14763	927	1		927	#N/A	#N/A	#N/A	1.14763	1	29.8413	32.2277	25
223	346.675	223	1.00868	223	29.8478	95	1.58881	95	1		95	#N/A	#N/A	#N/A	1.58881	1	56.3699	44.6168	25
1247	354.712	1247	1.00721	1247	29.8388	1119	1.45023	1119	1		1119	#N/A	#N/A	#N/A	1.45023	1	57.6767	40.7252	25
735	364.381	735	1.03292	735	61.169	607	1.48037	607	2		607	#N/A	#N/A	#N/A	1.48037	2	59.2489	41.5716	50
991	503.516	991	1.02229	991	46.2684	351	1.32643	351	1		351	#N/A	#N/A	#N/A	1.32643	1	81.8725	37.2487	25
63	371.68	63	1.03288	63	68.1456	863	1.84871	863	1		863	#N/A	#N/A	#N/A	1.84871	1	60.4358	51.9153	25
1087	255.776	1087	1.03964	1087	146.716	223	1.83616	223	2		223	#N/A	#N/A	#N/A	1.83616	2	41.5896	51.5629	50
575	101.467	575	1.03993	575	196.576	1247	1.58104	1247	2		1247	#N/A	#N/A	#N/A	1.58104	2	16.4987	44.3986	50
319	11.9673	319	1.0135	319	167.316	735	1.56577	735	2		735	#N/A	#N/A	#N/A	1.56577	2	1.9459	43.9698	50
831	184.96	831	1.01258	831	181.31	991	1.81666	991	2		991	#N/A	#N/A	#N/A	1.81666	2	30.0748	51.0153	50
191	414.526	191	1.01175	191	87.8512	63	1.42308	63	2		63	#N/A	#N/A	#N/A	1.42308	2	67.4026	39.9628	50
1215	527.993	1215	1.02595	1215	79.0179	1087	1.11277	1087	1		1087	#N/A	#N/A	#N/A	1.11277	1	85.8525	31.2487	25
703	136.816	703	1.00609	703	63.3067	575	1.13427	575	1		575	#N/A	#N/A	#N/A	1.13427	1	22.2465	31.8525	25
447	58.1671	447	1.03231	447	111.201	319	1.94727	319	1		319	#N/A	#N/A	#N/A	1.94727	1	9.45807	54.6831	25
959	211.557	959	1.02045	959	57.6975	831	1.47398	831	1		831	#N/A	#N/A	#N/A	1.47398	1	34.3995	41.3922	25
127	589.088	127	1.01783	127	230.429	191	1.55957	191	1		191	#N/A	#N/A	#N/A	1.55957	1	95.7867	43.7957	25
1151	269.929	1151	1.0246	1151	191.044	1215	1.91265	1215	2		1215	#N/A	#N/A	#N/A	1.91265	2	43.8909	53.7109	50
639	111.122	639	1.00869	639	83.7346	703	1.11877	703	1		703	#N/A	#N/A	#N/A	1.11877	1	18.0686	31.4172	25
383	30.9018	383	1.0068	383	101.289	447	1.11975	447	1		447	#N/A	#N/A	#N/A	1.11975	1	5.02468	31.4447	25
895	194.987	895	1.02896	895	57.3392	959	1.11975	959	1		959	#N/A	#N/A	#N/A	1.11975	1	31.7052	31.4447	25
255	357.904	255	1.04369	255	159.175	127	1.2599	127	1		127	#N/A	#N/A	#N/A	1.2599	1	58.1958	35.3804	25
1279	392.313	1279	1.02564	1279	83.5207	1151	1.24111	1151	1		1151	#N/A	#N/A	#N/A	1.24111	1	63.7907	34.8528	25
767	164.109	767	1.04028	767	127.227	639	1.26092	639	1		639	#N/A	#N/A	#N/A	1.26092	1	26.6844	35.4091	25
511	420.302	511	1.00878	511	51.1838	383	1.31986	383	1		383	#N/A	#N/A	#N/A	1.31986	1	68.3418	37.0642	25
1023	228.912	1023	1.01348	1023	70.504	895	1.15094	895	1		895	#N/A	#N/A	#N/A	1.15094	1	37.2215	32.3206	25
						255	1.35874	255	1		255	#N/A	#N/A	#N/A	1.35874	1	0	38.156	25
						1279	2.60479	1279	1		1279	#N/A	#N/A	#N/A	2.60479	1	0	73.1475	25
						767	1.19126	767	1		767	#N/A	#N/A	#N/A	1.19126	1	0	33.4529	25
						511	1.57505	511	2		511	#N/A	#N/A	#N/A	1.57505	2	0	44.2304	50
						1023	1.21641	1023	1		1023	#N/A	#N/A	#N/A	1.21641	1	0	34.1591	25

## Sheet: Col-0 sample7
	582.574		1.11924		1189.03		3.89613		4
Label	distance	Label	lobey	Label	area	Label	growth - mapped	Label	proli - mapped		LABEL	distance	lobey	area	growth	proli	distance (relative)	growth (relative)	proli (relative)
4096	115.035	4096	1.02075	4096	235.799	4096	1.77826	4096	1		4096	115.035	1.02075	235.799	1.77826	1	19.746	45.6417	25
3584	314.143	3584	1.00667	3584	23.1072	3584	2.05823	3584	2		3584	314.143	1.00667	23.1072	2.05823	2	53.9233	52.8275	50
256	7.70404	256	1.01457	256	78.235	256	1.69745	256	2		256	7.70404	1.01457	78.235	1.69745	2	1.32241	43.5676	50
3328	262.467	3328	1.04567	3328	129.197	3328	2.07739	3328	2		3328	262.467	1.04567	129.197	2.07739	2	45.053	53.3193	50
4224	97.218	4224	1.02902	4224	62.497	4224	3.30744	4224	2		4224	97.218	1.02902	62.497	3.30744	2	16.6877	84.8904	50
3200	133.996	3200	1.03324	3200	77.7226	3200	1.91093	3200	2		3200	133.996	1.03324	77.7226	1.91093	2	23.0007	49.0469	50
2688	59.9838	2688	1.03437	2688	144.267	2688	1.80204	2688	1		2688	59.9838	1.03437	144.267	1.80204	1	10.2963	46.2521	25
3712	259.016	3712	1.0524	3712	411.493	3712	2.25759	3712	1		3712	259.016	1.0524	411.493	2.25759	1	44.4606	57.9444	25
2432	519.655	2432	1.05411	2432	109.733	2432	1.30483	2432	1		2432	519.655	1.05411	109.733	1.30483	1	89.1998	33.4904	25
1408	77.9829	1408	1.01054	1408	34.2169	1408	2.16277	1408	3		1408	77.9829	1.01054	34.2169	2.16277	3	13.3859	55.5107	75
4160	523.237	4160	1.02361	4160	47.6437	4160	1.00839	4160	1		4160	523.237	1.02361	47.6437	1.00839	1	89.8147	25.8818	25
1088	445.656	1088	1.03856	1088	53.2103	1088	1.86649	1088	3		1088	445.656	1.03856	53.2103	1.86649	3	76.4977	47.9063	75
1600	190.143	1600	1.03172	1600	74.8573	1600	1.87804	1600	1		1600	190.143	1.03172	74.8573	1.87804	1	32.6384	48.2027	25
3648	55.2454	3648	1.03111	3648	30.4483	3648	1.68656	3648	3		3648	55.2454	1.03111	30.4483	1.68656	3	9.48298	43.2881	75
3392	356.869	3392	1.0295	3392	57.4633	3392	1.85678	3392	2		3392	356.869	1.0295	57.4633	1.85678	2	61.2573	47.657	50
4288	318.034	4288	1.03368	4288	18.0229	4288	2.19122	4288	2		4288	318.034	1.03368	18.0229	2.19122	2	54.5912	56.2409	50
2752	374.231	2752	1.00516	2752	37.875	2752	1.68396	2752	2		2752	374.231	1.00516	37.875	1.68396	2	64.2375	43.2214	50
2496	388.179	2496	1.04395	2496	334.342	2496	1.55575	2496	1		2496	388.179	1.04395	334.342	1.55575	1	66.6317	39.9306	25
3520	100.867	3520	1.03149	3520	73.8819	3520	1.78303	3520	2		3520	100.867	1.03149	73.8819	1.78303	2	17.314	45.7641	50
3008	126.594	3008	1.03683	3008	75.0493	3008	1.63509	3008	1		3008	126.594	1.03683	75.0493	1.63509	1	21.7301	41.967	25
4032	293.262	4032	1.04825	4032	129.446	4032	1.63912	4032	1		4032	293.262	1.04825	129.446	1.63912	1	50.339	42.0705	25
4128	175.967	4128	1.03711	4128	34.1686	4128	1.82808	4128	3		4128	175.967	1.03711	34.1686	1.82808	3	30.2051	46.9204	75
4256	385.155	4256	1.04604	4256	92.7265	4256	1.57439	4256	1		4256	385.155	1.04604	92.7265	1.57439	1	66.1126	40.4091	25
2208	207.843	2208	1.02005	2208	78.0631	2208	2.3716	2208	1		2208	207.843	1.02005	78.0631	2.3716	1	35.6767	60.8707	25
1184	196.974	1184	1.01914	1184	39.7767	1184	1.80631	1184	2		1184	196.974	1.01914	39.7767	1.80631	2	33.811	46.3616	50
3232	259.292	3232	1.02957	3232	112.678	3232	1.66046	3232	2		3232	259.292	1.02957	112.678	1.66046	2	44.508	42.6182	50
4000	269.707	4000	1.0161	4000	34.6791	4000	2.30989	4000	3		4000	269.707	1.0161	34.6791	2.30989	3	46.2957	59.2868	75
4192	301.744	4192	1.02772	4192	199.332	4192	1.54753	4192	1		4192	301.744	1.02772	199.332	1.54753	1	51.795	39.7197	25
3168	287.248	3168	1.02653	3168	150.386	3168	1.66282	3168	2		3168	287.248	1.02653	150.386	1.66282	2	49.3067	42.6788	50
1632	294.995	1632	1.02272	1632	72.8916	1632	1.90631	1632	2		1632	294.995	1.02272	72.8916	1.90631	2	50.6365	48.9283	50
3424	251.474	3424	1.02508	3424	99.0791	3424	2.07739	3424	2		3424	251.474	1.02508	99.0791	2.07739	2	43.166	53.3193	50
4320	417.169	4320	1.07052	4320	321.58	4320	1.88876	4320	1		4320	417.169	1.07052	321.58	1.88876	1	71.6079	48.4778	25
1248	304.699	1248	1.00899	1248	21.9217	1248	1.90278	1248	3		1248	304.699	1.00899	21.9217	1.90278	3	52.3022	48.8377	75
3808	218.757	3808	1.03415	3808	57.5245	3808	1.32432	3808	2		3808	218.757	1.03415	57.5245	1.32432	2	37.5501	33.9907	50
2528	96.6837	2528	1.01779	2528	73.2046	2528	1.66783	2528	2		2528	96.6837	1.01779	73.2046	1.66783	2	16.596	42.8073	50
3088	15.6453	3088	1.04818	3088	136.19	3088	1.93259	3088	2		3088	15.6453	1.04818	136.19	1.93259	2	2.68555	49.6028	50
2832	455.567	2832	1.01357	2832	85.5542	2832	1.54352	2832	2		2832	455.567	1.01357	85.5542	1.54352	2	78.199	39.6167	50
4240	517.471	4240	1.02496	4240	44.0606	4240	1.94329	4240	2		4240	517.471	1.02496	44.0606	1.94329	2	88.8249	49.8774	50
2192	574.608	2192	1.05671	2192	252.606	2192	1.2105	2192	1		2192	574.608	1.05671	252.606	1.2105	1	98.6326	31.0693	25
3472	154.335	3472	1.04756	3472	95.6688	3472	2.14789	3472	4		3472	154.335	1.04756	95.6688	2.14789	4	26.4919	55.1288	100
1936	311.665	1936	1.00927	1936	50.9049	1936	1.87238	1936	3		1936	311.665	1.00927	50.9049	1.87238	3	53.4979	48.0574	75
3984	281.938	3984	1.04667	3984	53.3474	3984	2.08564	3984	3		3984	281.938	1.04667	53.3474	2.08564	3	48.3952	53.5311	75
4176	532.635	4176	1.04573	4176	143.446	4176	1.43375	4176	1		4176	532.635	1.04573	143.446	1.43375	1	91.4279	36.7993	25
848	520.016	848	1.01733	848	35.184	848	1.83187	848	1		848	520.016	1.01733	35.184	1.83187	1	89.2618	47.0177	25
4304	235.231	4304	1.00977	4304	14.3004	4304	2.01191	4304	3		4304	235.231	1.00977	14.3004	2.01191	3	40.3779	51.6387	75
2256	227.449	2256	1.0063	2256	43.2044	2256	1.98725	2256	3		2256	227.449	1.0063	43.2044	1.98725	3	39.0421	51.0057	75
3280	276.928	3280	1.04994	3280	95.1963	3280	1.83618	3280	3		3280	276.928	1.04994	95.1963	1.83618	3	47.5352	47.1283	75
3792	122.874	3792	1.02611	3792	153.334	3792	1.54007	3792	2		3792	122.874	1.02611	153.334	1.54007	2	21.0916	39.5282	50
4048	257.011	4048	1.03309	4048	50.1017	4048	2.09486	4048	2		4048	257.011	1.03309	50.1017	2.09486	2	44.1165	53.7677	50
4144	272.264	4144	1.03197	4144	161	4144	2.46492	4144	1		4144	272.264	1.03197	161	2.46492	1	46.7347	63.2659	25
3120	255.428	3120	1.03764	3120	245.751	3120	1.44246	3120	1		3120	255.428	1.03764	245.751	1.44246	1	43.8447	37.0229	25
2608	416.596	2608	1.02797	2608	182.853	2608	1.65148	2608	2		2608	416.596	1.02797	182.853	1.65148	2	71.5095	42.3877	50
304	165.077	304	1.00665	304	24.877	304	1.76397	304	2		304	165.077	1.00665	24.877	1.76397	2	28.3358	45.2749	50
1328	8.56046	1328	1.03742	1328	59.6828	1328	2.07928	1328	2		1328	8.56046	1.03742	59.6828	2.07928	2	1.46942	53.3678	50
3888	333.522	3888	1.04907	3888	107.592	3888	2.21835	3888	1		3888	333.522	1.04907	107.592	2.21835	1	57.2497	56.9373	25
4272	374.42	4272	1.04323	4272	207.939	4272	1.7468	4272	1		4272	374.42	1.04323	207.939	1.7468	1	64.2699	44.8342	25
3248	371.283	3248	1.04082	3248	61.0422	3248	1.7991	3248	2		3248	371.283	1.04082	61.0422	1.7991	2	63.7315	46.1766	50
1712	240.652	1712	1.02604	1712	56.2024	1712	1.80779	1712	2		1712	240.652	1.02604	56.2024	1.80779	2	41.3084	46.3996	50
3760	314.443	3760	1.06503	3760	127.69	3760	1.80606	3760	1		3760	314.443	1.06503	127.69	1.80606	1	53.9748	46.3552	25
3504	153.241	3504	1.03045	3504	145.019	3504	1.31338	3504	1		3504	153.241	1.03045	145.019	1.31338	1	26.3041	33.7099	25
4208	134.804	4208	1.02244	4208	109.78	4208	3.89613	4208	4		4208	134.804	1.02244	109.78	3.89613	4	23.1394	100	100
3184	365.036	3184	1.04625	3184	145.655	3184	1.83	3184	1		3184	365.036	1.04625	145.655	1.83	1	62.6592	46.9697	25
3696	222.002	3696	1.02745	3696	56.5718	3696	2.10403	3696	3		3696	222.002	1.02745	56.5718	2.10403	3	38.1071	54.0031	75
368	317.982	368	1.04998	368	62.486	368	2.28664	368	1		368	317.982	1.04998	62.486	2.28664	1	54.5823	58.69	25
2288	62.2212	2288	1.03622	2288	152.821	2288	1.41188	2288	1		2288	62.2212	1.03622	152.821	1.41188	1	10.6804	36.238	25
2800	0	2800	1.03376	2800	215.821	2800	2.52028	2800	2		2800	0	1.03376	215.821	2.52028	2	0	64.6868	50
3824	320.547	3824	1.02672	3824	91.1696	3824	1.80215	3824	1		3824	320.547	1.02672	91.1696	1.80215	1	55.0225	46.2549	25
2544	157.995	2544	1.01734	2544	29.8616	2544	2.14459	2544	3		2544	157.995	1.01734	29.8616	2.14459	3	27.1202	55.0441	75
3568	214.17	3568	1.02406	3568	93.4046	3568	1.67159	3568	2		3568	214.17	1.02406	93.4046	1.67159	2	36.7627	42.9039	50
4104	196.378	4104	1.03588	4104	64.2423	4104	2.30528	4104	2		4104	196.378	1.03588	64.2423	2.30528	2	33.7087	59.1685	50
2056	224.887	2056	1.02306	2056	85.4255	2056	2.29446	2056	1		2056	224.887	1.02306	85.4255	2.29446	1	38.6023	58.8907	25
3080	294.131	3080	1.02445	3080	182.675	3080	1.43211	3080	1		3080	294.131	1.02445	182.675	1.43211	1	50.4882	36.7572	25
2568	441.768	2568	1.02872	2568	68.0799	2568	1.46899	2568	3		2568	441.768	1.02872	68.0799	1.46899	3	75.8304	37.7038	75
1288	284.538	1288	1.01155	1288	22.3877	1288	1.83618	1288	3		1288	284.538	1.01155	22.3877	1.83618	3	48.8415	47.1283	75
3336	337.786	3336	1.05131	3336	102.808	3336	1.8466	3336	2		3336	337.786	1.05131	102.808	1.8466	2	57.9816	47.3957	50
4232	72.7298	4232	1.02477	4232	78.6909	4232	2.02809	4232	2		4232	72.7298	1.02477	78.6909	2.02809	2	12.4842	52.054	50
2184	195.166	2184	1.02711	2184	164.661	2184	2.29038	2184	1		2184	195.166	1.02711	164.661	2.29038	1	33.5006	58.786	25
3464	148.728	3464	1.02804	3464	107.989	3464	1.65433	3464	2		3464	148.728	1.02804	107.989	1.65433	2	25.5295	42.4609	50
4168	578.164	4168	1.01686	4168	73.4087	4168	0.828592	4168	1		4168	578.164	1.01686	73.4087	0.828592	1	99.243	21.2671	25
4296	274.093	4296	1.00681	4296	15.2668	4296	1.84925	4296	3		4296	274.093	1.00681	15.2668	1.84925	3	47.0486	47.4638	75
3272	211.302	3272	1.02995	3272	299.672	3272	1.58785	3272	1		3272	211.302	1.02995	299.672	1.58785	1	36.2704	40.7545	25
2760	445.864	2760	1.04596	2760	59.8937	2760	2.67738	2760	2		2760	445.864	1.04596	59.8937	2.67738	2	76.5335	68.719	50
3784	28.786	3784	1.05952	3784	228.04	3784	2.2675	3784	2		3784	28.786	1.05952	228.04	2.2675	2	4.94117	58.1988	50
456	95.8124	456	1.00575	456	31.5281	456	2.24494	456	4		456	95.8124	1.00575	31.5281	2.24494	4	16.4464	57.6197	100
2504	486.219	2504	1.00936	2504	39.7838	2504	1.8526	2504	2		2504	486.219	1.00936	39.7838	1.8526	2	83.4605	47.5497	50
3528	306.8	3528	1.10534	3528	51.5329	3528	1.59797	3528	2		3528	306.8	1.10534	51.5329	1.59797	2	52.6628	41.0143	50
3016	189.282	3016	1.03531	3016	80.2168	3016	1.75525	3016	2		3016	189.282	1.03531	80.2168	1.75525	2	32.4906	45.0511	50
4136	163.305	4136	1.03063	4136	97.6573	4136	1.94658	4136	1		4136	163.305	1.03063	97.6573	1.94658	1	28.0316	49.9619	25
2600	389.07	2600	1.04612	2600	200.359	2600	1.54173	2600	1		2600	389.07	1.04612	200.359	1.54173	1	66.7846	39.5708	25
3368	188.661	3368	1.04802	3368	227.088	3368	1.70245	3368	1		3368	188.661	1.04802	227.088	1.70245	1	32.384	43.6959	25
3880	298.532	3880	1.048	3880	127.788	3880	1.87685	3880	1		3880	298.532	1.048	127.788	1.87685	1	51.2436	48.1722	25
168	13.1707	168	1.01804	168	94.6571	168	1.69745	168	2		168	13.1707	1.01804	94.6571	1.69745	2	2.26078	43.5676	50
4264	392.187	4264	1.01846	4264	51.7397	4264	2.2493	4264	2		4264	392.187	1.01846	51.7397	2.2493	2	67.3197	57.7316	50
2216	227.434	2216	1.05361	2216	106.633	2216	2.10734	2216	1		2216	227.434	1.05361	106.633	2.10734	1	39.0395	54.088	25
2728	466.86	2728	1.01429	2728	54.9467	2728	1.99597	2728	1		2728	466.86	1.01429	54.9467	1.99597	1	80.1375	51.2296	25
3752	251.298	3752	1.02897	3752	46.4402	3752	2.19999	3752	3		3752	251.298	1.02897	46.4402	2.19999	3	43.1358	56.466	75
4200	93.8279	4200	1.03578	4200	321.152	4200	1.55996	4200	1		4200	93.8279	1.03578	321.152	1.55996	1	16.1057	40.0387	25
1128	399.656	1128	1.04221	1128	131.651	1128	2.1668	1128	1		1128	399.656	1.04221	131.651	2.1668	1	68.6018	55.6142	25
3176	126.671	3176	1.01239	3176	76.9819	3176	1.91093	3176	2		3176	126.671	1.01239	76.9819	1.91093	2	21.7433	49.0469	50
3432	317.34	3432	1.04596	3432	54.3385	3432	1.47225	3432	1		3432	317.34	1.04596	54.3385	1.47225	1	54.472	37.7875	25
872	504.931	872	1.03961	872	120.12	872	1.75991	872	1		872	504.931	1.03961	120.12	1.75991	1	86.6724	45.1707	25
3944	112.719	3944	1.02074	3944	43.084	3944	2.44294	3944	4		3944	112.719	1.02074	43.084	2.44294	4	19.3484	62.7017	100
4328	505.46	4328	1.01322	4328	79.0019	4328	3.25697	4328	2		4328	505.46	1.01322	79.0019	3.25697	2	86.7632	83.595	50
3816	287.647	3816	1.00446	3816	32.5336	3816	1.93286	3816	2		3816	287.647	1.00446	32.5336	1.93286	2	49.3752	49.6097	50
2536	423.886	2536	1.03463	2536	89.1489	2536	1.45281	2536	2		2536	423.886	1.03463	89.1489	1.45281	2	72.7609	37.2885	50
1512	146.491	1512	1.02126	1512	61.743	1512	1.96578	1512	3		1512	146.491	1.02126	61.743	1.96578	3	25.1455	50.4547	75
3048	95.7197	3048	1.03412	3048	183.031	3048	1.65158	3048	1		3048	95.7197	1.03412	183.031	1.65158	1	16.4305	42.3903	25
3096	36.3581	3096	1.02597	3096	289.277	3096	2.11231	3096	1		3096	36.3581	1.02597	289.277	2.11231	1	6.24094	54.2156	25
2584	129.701	2584	1.02836	2584	110.197	2584	1.95754	2584	2		2584	129.701	1.02836	110.197	1.95754	2	22.2634	50.2432	50
3608	132.433	3608	1.03727	3608	138.204	3608	2.46665	3608	1		3608	132.433	1.03727	138.204	2.46665	1	22.7324	63.3103	25
3864	258.569	3864	1.01572	3864	57.836	3864	2.39701	3864	2		3864	258.569	1.01572	57.836	2.39701	2	44.3839	61.5228	50
4248	502.667	4248	1.03504	4248	38.2384	4248	1.47438	4248	2		4248	502.667	1.03504	38.2384	1.47438	2	86.2838	37.8422	50
2456	464.005	2456	1.05836	2456	287.422	2456	1.92076	2456	1		2456	464.005	1.05836	287.422	1.92076	1	79.6474	49.2992	25
3480	287.403	3480	1.06267	3480	99.5299	3480	1.92965	3480	1		3480	287.403	1.06267	99.5299	1.92965	1	49.3333	49.5274	25
1944	145.907	1944	1.04216	1944	110.135	1944	2.03104	1944	2		1944	145.907	1.04216	110.135	2.03104	2	25.0452	52.1297	50
3992	229.555	3992	1.01559	3992	62.5022	3992	2.32927	3992	2		3992	229.555	1.01559	62.5022	2.32927	2	39.4036	59.7842	50
4184	398.123	4184	1.04283	4184	404.79	4184	1.59113	4184	1		4184	398.123	1.04283	404.79	1.59113	1	68.3386	40.8387	25
3160	219.299	3160	1.04719	3160	83.3095	3160	2.25872	3160	2		3160	219.299	1.04719	83.3095	2.25872	2	37.6431	57.9734	50
3416	194.688	3416	1.02733	3416	254.329	3416	1.5529	3416	1		3416	194.688	1.02733	254.329	1.5529	1	33.4186	39.8575	25
2904	76.313	2904	1.02501	2904	170.411	2904	1.62052	2904	1		2904	76.313	1.02501	170.411	1.62052	1	13.0993	41.5931	25
3928	220.507	3928	1.05813	3928	133.711	3928	2.33945	3928	3		3928	220.507	1.05813	133.711	2.33945	3	37.8505	60.0455	75
4312	134.752	4312	1.02292	4312	29.3528	4312	1.78667	4312	3		4312	134.752	1.02292	29.3528	1.78667	3	23.1305	45.8576	75
3288	322.135	3288	1.0204	3288	43.5123	3288	2.65174	3288	1		3288	322.135	1.0204	43.5123	2.65174	1	55.2951	68.0609	25
1496	299.599	1496	1.0092	1496	22.1875	1496	1.76307	1496	2		1496	299.599	1.0092	22.1875	1.76307	2	51.4268	45.2518	50
4056	337.525	4056	1.04176	4056	132.035	4056	1.5886	4056	1		4056	337.525	1.04176	132.035	1.5886	1	57.9368	40.7738	25
4152	334.498	4152	1.02889	4152	230.704	4152	1.88809	4152	1		4152	334.498	1.02889	230.704	1.88809	1	57.4173	48.4607	25
3640	256.708	3640	1.01124	3640	25.3527	3640	2.33972	3640	3		3640	256.708	1.01124	25.3527	2.33972	3	44.0644	60.0524	75
2360	105.257	2360	1.03505	2360	62.721	2360	1.66783	2360	2		2360	105.257	1.03505	62.721	1.66783	2	18.0676	42.8073	50
1336	134.868	1336	1.02695	1336	59.5769	1336	2.11123	1336	2		1336	134.868	1.02695	59.5769	2.11123	2	23.1504	54.1879	50
3384	60.5653	3384	1.03322	3384	135.442	3384	1.99933	3384	2		3384	60.5653	1.03322	135.442	1.99933	2	10.3962	51.3158	50
2872	385.283	2872	1.0528	2872	225.028	2872	1.87046	2872	1		2872	385.283	1.0528	225.028	1.87046	1	66.1346	48.0082	25
3896	0	3896	1.04318	3896	152.601	3896	1.89005	3896	2		3896	0	1.04318	152.601	1.89005	2	0	48.511	50
184	137.745	184	1.02326	184	64.0119	184	2.39666	184	3		184	137.745	1.02326	64.0119	2.39666	3	23.6442	61.5139	75
4280	338.882	4280	1.0385	4280	46.767	4280	1.72714	4280	2		4280	338.882	1.0385	46.767	1.72714	2	58.1698	44.3296	50
2232	532.115	2232	1.09651	2232	256.551	2232	1.51527	2232	1		2232	532.115	1.09651	256.551	1.51527	1	91.3386	38.8917	25
1720	186.567	1720	1.02052	1720	33.1702	1720	2.32687	1720	3		1720	186.567	1.02052	33.1702	2.32687	3	32.0246	59.7226	75
4216	102.678	4216	1.04121	4216	79.1089	4216	2.79385	4216	2		4216	102.678	1.04121	79.1089	2.79385	2	17.6249	71.7083	50
2168	219.636	2168	1.05507	2168	96.5388	2168	1.90271	2168	2		2168	219.636	1.05507	96.5388	1.90271	2	37.701	48.8359	50
1144	352.635	1144	1.01911	1144	120.131	1144	1.65424	1144	2		1144	352.635	1.01911	120.131	1.65424	2	60.5305	42.4585	50
3192	22.958	3192	1.04981	3192	139.932	3192	2.24924	3192	1		3192	22.958	1.04981	139.932	2.24924	1	3.94079	57.7301	25
2680	32.1201	2680	1.04243	2680	107.043	2680	1.93259	2680	2		2680	32.1201	1.04243	107.043	1.93259	2	5.51348	49.6028	50
3704	303.047	3704	1.04967	3704	81.2945	3704	1.96618	3704	1		3704	303.047	1.04967	81.2945	1.96618	1	52.0186	50.4649	25
2424	267.178	2424	1.04067	2424	168.292	2424	2.01822	2424	1		2424	267.178	1.04067	168.292	2.01822	1	45.8616	51.8006	25
3448	138.865	3448	1.03648	3448	97.7242	3448	1.65433	3448	2		3448	138.865	1.03648	97.7242	1.65433	2	23.8365	42.4609	50
3960	128.878	3960	1.04114	3960	68.3516	3960	1.8258	3960	2		3960	128.878	1.04114	68.3516	1.8258	2	22.1222	46.8619	50
4344	0	4344	1.02599	4344	151.038	3320	1.9542	3320	2		4344	0	1.02599	151.038	#N/A	#N/A	0	50.1575	50
3320	275.792	3320	1.03455	3320	115.119	3832	2.19871	3832	3		3320	275.792	1.03455	115.119	#N/A	#N/A	47.3403	56.4332	75
3832	219.465	3832	1.0167	3832	88.0238	3576	3.07274	3576	4		3832	219.465	1.0167	88.0238	#N/A	#N/A	37.6716	78.8665	100
3576	76.5154	3576	1.02132	3576	39.3021	4088	1.43522	4088	1		3576	76.5154	1.02132	39.3021	#N/A	#N/A	13.134	36.8371	25
4088	90.9974	4088	1.03528	4088	291.648	4100	2.14789	4100	4		4088	90.9974	1.03528	291.648	#N/A	#N/A	15.6199	55.1288	100
4100	162.433	4100	1.01792	4100	49.8133	2052	1.8931	2052	3		4100	162.433	1.01792	49.8133	#N/A	#N/A	27.882	48.5892	75
2052	111.373	2052	1.03968	2052	99.5502	2564	3.35567	2564	4		2052	111.373	1.03968	99.5502	#N/A	#N/A	19.1174	86.1283	100
2564	101.632	2564	1.03665	2564	65.8899	3588	2.05348	3588	1		2564	101.632	1.03665	65.8899	#N/A	#N/A	17.4453	52.7056	25
3588	186.412	3588	1.05339	3588	190.11	3332	1.69755	3332	2		3588	186.412	1.05339	190.11	#N/A	#N/A	31.998	43.5702	50
3332	284.129	3332	1.02144	3332	76.8497	772	2.42118	772	2		3332	284.129	1.02144	76.8497	#N/A	#N/A	48.7713	62.1432	50
772	42.3693	772	1.02061	772	93.3178	2820	1.79393	2820	2		772	42.3693	1.02061	93.3178	#N/A	#N/A	7.27278	46.0439	50
2820	223.509	2820	1.05664	2820	128.966	4228	3.12277	4228	3		2820	223.509	1.05664	128.966	#N/A	#N/A	38.3658	80.1506	75
4228	80.9998	4228	1.04371	4228	59.2326	1156	1.90482	1156	1		4228	80.9998	1.04371	59.2326	#N/A	#N/A	13.9038	48.8901	25
1156	339.248	1156	1.03521	1156	72.3327	3204	1.97289	3204	3		1156	339.248	1.03521	72.3327	#N/A	#N/A	58.2326	50.6372	75
3204	168.842	3204	1.02149	3204	38.2805	2692	1.89415	2692	1		3204	168.842	1.02149	38.2805	#N/A	#N/A	28.9821	48.6162	25
2692	470.604	2692	1.03533	2692	132.66	3716	1.6694	3716	1		2692	470.604	1.03533	132.66	#N/A	#N/A	80.7801	42.8476	25
3716	113.824	3716	1.02301	3716	148.409	1412	1.76747	1412	1		3716	113.824	1.02301	148.409	#N/A	#N/A	19.5381	45.3648	25
1412	255.445	1412	1.03592	1412	145.748	3972	1.90734	3972	2		1412	255.445	1.03592	145.748	#N/A	#N/A	43.8476	48.9547	50
3972	150.392	3972	1.0513	3972	81.0416	4164	1.40275	4164	1		3972	150.392	1.0513	81.0416	#N/A	#N/A	25.8151	36.0037	25
4164	566.909	4164	1.04442	4164	392.296	1092	1.87259	1092	3		4164	566.909	1.04442	392.296	#N/A	#N/A	97.3111	48.0628	75
1092	116.724	1092	1.03302	1092	116.887	1348	2.3135	1348	3		1092	116.724	1.03302	116.887	#N/A	#N/A	20.0359	59.3794	75
1348	215.417	1348	1.02692	1348	35.0114	3396	2.16237	3396	3		1348	215.417	1.02692	35.0114	#N/A	#N/A	36.9768	55.5005	75
3396	385.635	3396	1.03047	3396	54.5828	4292	2.22671	4292	2		3396	385.635	1.03047	54.5828	#N/A	#N/A	66.195	57.1518	50
4292	310.013	4292	1.01276	4292	32.0137	1732	2.24494	1732	4		4292	310.013	1.01276	32.0137	#N/A	#N/A	53.2144	57.6197	100
1732	89.2577	1732	1.05759	1732	55.0317	3012	2.11379	3012	2		1732	89.2577	1.05759	55.0317	#N/A	#N/A	15.3213	54.2536	50
3012	158.482	3012	1.02599	3012	63.1941	4036	1.39419	4036	2		3012	158.482	1.02599	63.1941	#N/A	#N/A	27.2038	35.784	50
4036	125.647	4036	1.03093	4036	94.3206	4132	1.90734	4132	2		4036	125.647	1.03093	94.3206	#N/A	#N/A	21.5676	48.9547	50
4132	147.724	4132	1.03039	4132	77.838	2852	2.54472	2852	2		4132	147.724	1.03039	77.838	#N/A	#N/A	25.3571	65.314	50
2852	123.51	2852	1.02294	2852	31.7706	3876	1.97989	3876	2		2852	123.51	1.02294	31.7706	#N/A	#N/A	21.2007	50.8168	50
3876	270.816	3876	1.02312	3876	38.898	4260	1.75587	4260	2		3876	270.816	1.02312	38.898	#N/A	#N/A	46.4861	45.067	50
4260	402.353	4260	1.06146	4260	61.9064	3492	1.65022	3492	2		4260	402.353	1.06146	61.9064	#N/A	#N/A	69.0647	42.3554	50
3492	370.105	3492	1.03351	3492	49.2162	4196	1.45918	4196	1		3492	370.105	1.03351	49.2162	#N/A	#N/A	63.5293	37.452	25
4196	221.417	4196	1.03618	4196	529.217	3684	1.68852	3684	1		4196	221.417	1.03618	529.217	#N/A	#N/A	38.0067	43.3384	25
3684	164.333	3684	1.03169	3684	194.714	356	1.76307	356	2		3684	164.333	1.03169	194.714	#N/A	#N/A	28.2081	45.2518	50
356	303.488	356	1.01332	356	26.3708	2916	1.73306	2916	1		356	303.488	1.01332	26.3708	#N/A	#N/A	52.0943	44.4816	25
2916	368.959	2916	1.03918	2916	192.824	3940	2.11459	3940	2		2916	368.959	1.03918	192.824	#N/A	#N/A	63.3326	54.2741	50
3940	333.879	3940	1.00796	3940	32.3494	4324	2.27265	4324	4		3940	333.879	1.00796	32.3494	#N/A	#N/A	57.311	58.331	100
4324	192.546	4324	1.00884	4324	12.1645	3812	2.27597	3812	2		4324	192.546	1.00884	12.1645	#N/A	#N/A	33.0509	58.4162	50
3812	240.616	3812	1.0179	3812	44.6946	1556	2.4051	1556	3		3812	240.616	1.0179	44.6946	#N/A	#N/A	41.3022	61.7305	75
1556	178.206	1556	1.02886	1556	37.5536	3860	2.41553	3860	2		1556	178.206	1.02886	37.5536	#N/A	#N/A	30.5894	61.9982	50
3860	240.644	3860	1.0394	3860	93.5048	4244	1.85867	4244	1		3860	240.644	1.0394	93.5048	#N/A	#N/A	41.307	47.7055	25
4244	534.932	4244	1.03815	4244	180.331	2452	1.77846	2452	2		4244	534.932	1.03815	180.331	#N/A	#N/A	91.8222	45.6468	50
2452	449.5	2452	1.02721	2452	76.3594	3476	1.96555	3476	3		2452	449.5	1.02721	76.3594	#N/A	#N/A	77.1576	50.4488	75
3476	266.081	3476	1.03175	3476	40.4713	2964	1.74938	2964	1		3476	266.081	1.03175	40.4713	#N/A	#N/A	45.6733	44.9005	25
2964	347.16	2964	1.0174	2964	60.1335	4180	1.34796	4180	1		2964	347.16	1.0174	60.1335	#N/A	#N/A	59.5907	34.5974	25
4180	493.595	4180	1.06052	4180	316.054	1108	1.9691	1108	2		4180	493.595	1.06052	316.054	#N/A	#N/A	84.7266	50.5399	50
1108	433.533	1108	1.04484	1108	45.6312	3156	1.33783	3156	1		1108	433.533	1.04484	45.6312	#N/A	#N/A	74.4168	34.3374	25
3156	221.579	3156	1.04392	3156	236.558	2644	1.65148	2644	2		3156	221.579	1.04392	236.558	#N/A	#N/A	38.0345	42.3877	50
2644	405.466	2644	1.02173	2644	150.832	1620	1.8892	1620	2		2644	405.466	1.02173	150.832	#N/A	#N/A	69.5991	48.4891	50
1620	285.045	1620	1.03105	1620	96.8814	2388	2.06079	2388	2		1620	285.045	1.03105	96.8814	#N/A	#N/A	48.9285	52.8933	50
2388	182.387	2388	1.04964	2388	89.8604	1364	1.61831	1364	1		2388	182.387	1.04964	89.8604	#N/A	#N/A	31.3071	41.5363	25
1364	378.203	1364	1.03968	1364	79.5506	3924	2.35774	3924	2		1364	378.203	1.03968	79.5506	#N/A	#N/A	64.9193	60.5149	50
3924	28.6089	3924	1.01497	3924	152.735	4308	1.86425	4308	3		3924	28.6089	1.01497	152.735	#N/A	#N/A	4.91078	47.8488	75
4308	84.8589	4308	1.02278	4308	12.2854	3284	1.74828	3284	2		4308	84.8589	1.02278	12.2854	#N/A	#N/A	14.5662	44.8722	50
3284	305.369	3284	1.02183	3284	121.844	2772	2.03838	2772	2		3284	305.369	1.02183	121.844	#N/A	#N/A	52.4172	52.3181	50
2772	252.942	2772	1.02665	2772	66.0656	3796	2.15639	3796	4		2772	252.942	1.02665	66.0656	#N/A	#N/A	43.418	55.347	100
3796	59.092	3796	1.0313	3796	68.8883	1492	1.59016	1492	2		3796	59.092	1.0313	68.8883	#N/A	#N/A	10.1433	40.8138	50
1492	191.048	1492	1.02531	1492	112.268	3028	2.24494	3028	2		1492	191.048	1.02531	112.268	#N/A	#N/A	32.7938	57.6197	50
3028	216.796	3028	1.03869	3028	63.0002	4052	2.05628	4052	2		3028	216.796	1.03869	63.0002	#N/A	#N/A	37.2135	52.7775	50
4052	277.966	4052	1.02864	4052	60.015	4148	2.40149	4148	2		4052	277.966	1.02864	60.015	#N/A	#N/A	47.7134	61.6378	50
4148	281.74	4148	1.02159	4148	48.6808	1076	1.96636	1076	1		4148	281.74	1.02159	48.6808	#N/A	#N/A	48.3612	50.4696	25
1076	450.439	1076	1.04202	1076	237.385	3124	1.53248	3124	1		1076	450.439	1.04202	237.385	#N/A	#N/A	77.3188	39.3334	25
3124	273.703	3124	1.04437	3124	351.48	2612	1.75591	2612	3		3124	273.703	1.04437	351.48	#N/A	#N/A	46.9817	45.0681	75
2612	451.21	2612	1.05841	2612	146.964	3380	1.96218	3380	3		2612	451.21	1.05841	146.964	#N/A	#N/A	77.4511	50.3623	75
3380	276.534	3380	1.0208	3380	28.976	2868	1.83895	2868	3		3380	276.534	1.0208	28.976	#N/A	#N/A	47.4676	47.1994	75
2868	177.227	2868	1.01479	2868	45.2854	3892	2.0427	3892	2		2868	177.227	1.01479	45.2854	#N/A	#N/A	30.4214	52.4289	50
3892	364.321	3892	1.02058	3892	68.8559	4276	2.82688	4276	2		3892	364.321	1.02058	68.8559	#N/A	#N/A	62.5364	72.5561	50
4276	353.699	4276	1.0085	4276	46.1931	3252	1.68165	3252	1		4276	353.699	1.0085	46.1931	#N/A	#N/A	60.7131	43.1621	25
3252	445.156	3252	1.05696	3252	809.428	1716	2.2675	1716	2		3252	445.156	1.05696	809.428	#N/A	#N/A	76.4119	58.1988	50
1716	12.7027	1716	1.02329	1716	234.836	3764	1.99762	3764	3		1716	12.7027	1.02329	234.836	#N/A	#N/A	2.18044	51.2719	75
3764	341.857	3764	1.01758	3764	73.4965	436	2.05628	436	2		3764	341.857	1.01758	73.4965	#N/A	#N/A	58.6804	52.7775	50
436	277.315	436	1.03026	436	53.0224	4212	3.12603	4212	2		436	277.315	1.03026	53.0224	#N/A	#N/A	47.6017	80.2342	50
4212	112.313	4212	1.0368	4212	60.7984	1140	2.24494	1140	2		4212	112.313	1.0368	60.7984	#N/A	#N/A	19.2788	57.6197	50
1140	222.555	1140	1.03019	1140	48.4156	3700	2.51925	3700	1		1140	222.555	1.03019	48.4156	#N/A	#N/A	38.202	64.6603	25
3700	247.96	3700	1.05777	3700	129.174	3316	1.8475	3316	1		3700	247.96	1.05777	129.174	#N/A	#N/A	42.5628	47.4188	25
4340	15.1907	4340	1.04483	4340	122.067	4084	1.21498	4084	2		4340	15.1907	1.04483	122.067	#N/A	#N/A	2.60751	31.1843	50
3316	215.251	3316	1.02916	3316	225.092	4108	2.08176	4108	1		3316	215.251	1.02916	225.092	#N/A	#N/A	36.9483	53.4315	25
2804	0	2804	1.044	2804	237.441	3084	1.83401	3084	2		2804	0	1.044	237.441	#N/A	#N/A	0	47.0726	50
4084	72.6601	4084	1.02637	4084	87.1945	2572	1.75591	2572	3		4084	72.6601	1.02637	87.1945	#N/A	#N/A	12.4723	45.0681	75
4108	213.91	4108	1.03093	4108	153.815	1548	2.27597	1548	2		4108	213.91	1.03093	153.815	#N/A	#N/A	36.7181	58.4162	50
3084	328.02	3084	1.05058	3084	127.789	1292	1.90833	1292	1		3084	328.02	1.05058	127.789	#N/A	#N/A	56.3053	48.9801	25
2572	462.724	2572	1.041	2572	78.8546	3340	1.78753	3340	1		2572	462.724	1.041	78.8546	#N/A	#N/A	79.4275	45.8796	25
1548	235.058	1548	1.01482	1548	38.3188	2828	1.6916	2828	1		1548	235.058	1.01482	38.3188	#N/A	#N/A	40.3482	43.4174	25
1292	327.738	1292	1.03439	1292	63.6675	1804	2.08949	1804	3		1292	327.738	1.03439	63.6675	#N/A	#N/A	56.2569	53.6299	75
3340	380.115	3340	1.0578	3340	280.412	3852	2.11548	3852	1		3340	380.115	1.0578	280.412	#N/A	#N/A	65.2475	54.297	25
2828	430.518	2828	1.09261	2828	218.446	4236	1.63572	4236	2		2828	430.518	1.09261	218.446	#N/A	#N/A	73.8993	41.9832	50
1804	209.989	1804	1.01869	1804	28.533	1932	2.09488	1932	3		1804	209.989	1.01869	28.533	#N/A	#N/A	36.045	53.7682	75
3852	237.902	3852	1.02735	3852	123.211	76	2.08564	76	3		3852	237.902	1.02735	123.211	#N/A	#N/A	40.8364	53.5311	75
4236	142.124	4236	1.029	4236	267.165	4172	1.49461	4172	1		4236	142.124	1.029	267.165	#N/A	#N/A	24.3959	38.3614	25
1932	257.549	1932	1.06816	1932	124.233	1100	2.14459	1100	3		1932	257.549	1.06816	124.233	#N/A	#N/A	44.2088	55.0441	75
76	278.708	76	1.0035	76	24.4594	3660	2.64118	3660	3		76	278.708	1.0035	24.4594	#N/A	#N/A	47.8408	67.7898	75
4172	537.384	4172	1.04772	4172	87.6657	2380	2.09488	2380	3		4172	537.384	1.04772	87.6657	#N/A	#N/A	92.243	53.7682	75
1100	161.081	1100	1.03853	1100	89.2418	844	2.28202	844	2		1100	161.081	1.03853	89.2418	#N/A	#N/A	27.6499	58.5715	50
3660	86.4102	3660	1.02282	3660	28.1047	4300	2.02371	4300	3		3660	86.4102	1.02282	28.1047	#N/A	#N/A	14.8325	51.9415	75
2380	261.807	2380	1.01424	2380	15.5287	3276	2.09294	3276	3		2380	261.807	1.01424	15.5287	#N/A	#N/A	44.9397	53.7184	75
844	40.2942	844	1.02415	844	186.346	2764	2.14789	2764	4		844	40.2942	1.02415	186.346	#N/A	#N/A	6.91658	55.1288	100
4300	209.14	4300	1.00142	4300	13.2199	2508	1.69125	2508	1		4300	209.14	1.00142	13.2199	#N/A	#N/A	35.8993	43.4085	25
3276	117.943	3276	1.05023	3276	121.29	3532	2.25658	3532	2		3276	117.943	1.05023	121.29	#N/A	#N/A	20.2452	57.9185	50
2764	164.455	2764	1.00875	2764	32.3231	4044	2.00177	4044	2		2764	164.455	1.00875	32.3231	#N/A	#N/A	28.229	51.3784	50
2508	77.2776	2508	1.02083	2508	203.702	4140	2.07962	4140	1		2508	77.2776	1.02083	203.702	#N/A	#N/A	13.2649	53.3766	25
3532	338.387	3532	1.00682	3532	24.3597	2604	1.66105	2604	2		3532	338.387	1.00682	24.3597	#N/A	#N/A	58.0848	42.6333	50
4044	173.559	4044	1.0347	4044	122.397	4268	1.93096	4268	2		4044	173.559	1.0347	122.397	#N/A	#N/A	29.7918	49.561	50
4140	239.453	4140	1.05662	4140	159.289	3244	2.41777	3244	3		4140	239.453	1.05662	159.289	#N/A	#N/A	41.1026	62.0557	75
2604	401.77	2604	1.03277	2604	103.955	428	1.78606	428	1		2604	401.77	1.03277	103.955	#N/A	#N/A	68.9646	45.8419	25
4268	394.381	4268	1.0115	4268	30.7554	3180	1.88712	3180	3		4268	394.381	1.0115	30.7554	#N/A	#N/A	67.6963	48.4358	75
3244	343.783	3244	1.01212	3244	33.2373	2668	1.46238	2668	2		3244	343.783	1.01212	33.2373	#N/A	#N/A	59.011	37.5342	50
428	351.325	428	1.0267	428	157.565	3692	1.49804	3692	1		428	351.325	1.0267	157.565	#N/A	#N/A	60.3056	38.4494	25
4204	88.9114	4204	1.03005	4204	169.357	3436	2.05886	3436	3		4204	88.9114	1.03005	169.357	#N/A	#N/A	15.2618	52.8437	75
3180	352.349	3180	1.03268	3180	98.1672	1900	3.35567	1900	4		3180	352.349	1.03268	98.1672	#N/A	#N/A	60.4814	86.1283	100
2668	346.745	2668	1.02971	2668	164.633	4332	2.32927	4332	2		2668	346.745	1.02971	164.633	#N/A	#N/A	59.5195	59.7842	50
3692	197.247	3692	1.02143	3692	163.411	2796	1.91666	2796	1		3692	197.247	1.02143	163.411	#N/A	#N/A	33.8578	49.1939	25
3436	250.751	3436	1.01514	3436	50.1694	3820	2.27656	3820	2		3436	250.751	1.01514	50.1694	#N/A	#N/A	43.0419	58.4313	50
1900	95.7214	1900	1.02493	1900	60.055	2540	2.39666	2540	3		1900	95.7214	1.02493	60.055	#N/A	#N/A	16.4308	61.5139	75
4332	222.274	4332	1.03517	4332	132.37	3564	2.19086	3564	1		4332	222.274	1.03517	132.37	#N/A	#N/A	38.1538	56.2317	25
2796	397.655	2796	1.05897	2796	139.505	2332	1.6488	2332	1		2796	397.655	1.05897	139.505	#N/A	#N/A	68.2583	42.3189	25
3820	308.57	3820	1.02225	3820	51.4907	3868	2.31602	3868	3		3820	308.57	1.02225	51.4907	#N/A	#N/A	52.9667	59.4441	75
2540	142.406	2540	1.01925	2540	36.5187	4252	1.46899	4252	3		2540	142.406	1.01925	36.5187	#N/A	#N/A	24.4443	37.7038	75
3564	243.511	3564	1.05685	3564	188.677	3228	1.67811	3228	1		3564	243.511	1.05685	188.677	#N/A	#N/A	41.7992	43.0712	25
2332	501.213	2332	1.02048	2332	77.178	2716	2.15865	2716	2		2332	501.213	1.02048	77.178	#N/A	#N/A	86.0342	55.405	50
3868	201.998	3868	1.02338	3868	41.6091	1692	1.8571	1692	2		3868	201.998	1.02338	41.6091	#N/A	#N/A	34.6734	47.6652	50
4252	440.133	4252	1.01686	4252	34.1939	3740	1.85927	3740	1		4252	440.133	1.01686	34.1939	#N/A	#N/A	75.5497	47.7209	25
3228	244.647	3228	1.03843	3228	291.97	2460	1.73609	2460	1		3228	244.647	1.03843	291.97	#N/A	#N/A	41.9942	44.5593	25
2716	134.539	2716	1.03294	2716	54.1107	3996	1.33949	3996	2		2716	134.539	1.03294	54.1107	#N/A	#N/A	23.0939	34.38	50
1692	154.181	1692	1.02324	1692	74.4458	4188	1.65362	4188	1		1692	154.181	1.02324	74.4458	#N/A	#N/A	26.4655	42.4426	25
3740	147.554	3740	1.02163	3740	245.604	2908	1.64788	2908	2		3740	147.554	1.02163	245.604	#N/A	#N/A	25.3279	42.2953	50
2460	501.05	2460	1.05845	2460	313.718	220	1.46238	220	2		2460	501.05	1.05845	313.718	#N/A	#N/A	86.0062	37.5342	50
3996	248.951	3996	1.04076	3996	91.9814	4316	1.82487	4316	1		3996	248.951	1.04076	91.9814	#N/A	#N/A	42.7329	46.838	25
4188	314.559	4188	1.0267	4188	208.303	3292	1.88712	3292	3		4188	314.559	1.0267	208.303	#N/A	#N/A	53.9947	48.4358	75
2908	340.439	2908	1.03142	2908	164.833	3804	1.56641	3804	1		2908	340.439	1.03142	164.833	#N/A	#N/A	58.437	40.2043	25
220	355.174	220	1.03009	220	183.658	3036	1.61863	3036	3		220	355.174	1.03009	183.658	#N/A	#N/A	60.9663	41.5446	75
4316	361.886	4316	1.02249	4316	179.832	4156	1.61656	4156	1		4316	361.886	1.02249	179.832	#N/A	#N/A	62.1185	41.4914	25
3292	347.985	3292	1.03932	3292	80.5354	3644	1.77359	3644	2		3292	347.985	1.03932	80.5354	#N/A	#N/A	59.7323	45.5218	50
3804	188.747	3804	1.01858	3804	122.969	3388	1.21943	3388	1		3804	188.747	1.01858	122.969	#N/A	#N/A	32.3988	31.2985	25
3036	318.8	3036	1.03567	3036	76.1091	828	1.62606	828	1		3036	318.8	1.03567	76.1091	#N/A	#N/A	54.7227	41.7353	25
4156	440.178	4156	1.03943	4156	469.71	1852	2.14789	1852	4		4156	440.178	1.03943	469.71	#N/A	#N/A	75.5574	55.1288	100
2620	45.2952	2620	1.0293	2620	219.625	4284	1.75563	4284	2		2620	45.2952	1.0293	219.625	#N/A	#N/A	7.77501	45.0609	50
3644	282.914	3644	1.02144	3644	94.1295	2236	1.89324	2236	3		3644	282.914	1.02144	94.1295	#N/A	#N/A	48.5628	48.5928	75
3388	15.343	3388	1.02529	3388	172.001	3260	1.95754	3260	2		3388	15.343	1.02529	172.001	#N/A	#N/A	2.63366	50.2432	50
828	465.102	828	1.04527	828	186.194	3516	1.80081	3516	3		828	465.102	1.04527	186.194	#N/A	#N/A	79.8357	46.2205	75
1852	163.409	1852	1.02043	1852	61.616	956	1.44834	956	2		1852	163.409	1.02043	61.616	#N/A	#N/A	28.0495	37.1738	50
4284	344.727	4284	1.04269	4284	57.7052	3004	1.61863	3004	3		4284	344.727	1.04269	57.7052	#N/A	#N/A	59.1731	41.5446	75
2236	131.863	2236	1.01142	2236	43.2678	4220	2.70648	4220	3		2236	131.863	1.01142	43.2678	#N/A	#N/A	22.6345	69.4659	75
3260	118.919	3260	1.0437	3260	111.773	2428	1.53178	2428	1		3260	118.919	1.0437	111.773	#N/A	#N/A	20.4127	39.3154	25
3516	237.855	3516	1.01994	3516	28.7657	892	1.53708	892	2		3516	237.855	1.01994	28.7657	#N/A	#N/A	40.8283	39.4515	50
956	412.084	956	1.03275	956	222.153	1276	2.28796	1276	1		956	412.084	1.03275	222.153	#N/A	#N/A	70.735	58.7239	25
3004	319.158	3004	1.01666	3004	39.5257	3324	1.77388	3324	1		3004	319.158	1.01666	39.5257	#N/A	#N/A	54.7841	45.5293	25
4220	73.0976	4220	1.02983	4220	38.8817	3836	2.03104	3836	2		4220	73.0976	1.02983	38.8817	#N/A	#N/A	12.5474	52.1297	50
2428	478.997	2428	1.03254	2428	70.2712	3580	1.79529	3580	2		2428	478.997	1.03254	70.2712	#N/A	#N/A	82.2208	46.0788	50
892	460.295	892	1.03322	892	194.987	4098	3.46037	4098	3		892	460.295	1.03322	194.987	#N/A	#N/A	79.0106	88.8156	75
4348	42.9841	4348	1.03966	4348	67.9728	2562	2.13815	2562	2		4348	42.9841	1.03966	67.9728	#N/A	#N/A	7.37831	54.8788	50
1276	420.367	1276	1.06083	1276	119.028	3586	1.77637	3586	1		1276	420.367	1.06083	119.028	#N/A	#N/A	72.1568	45.5932	25
3324	299.568	3324	1.06571	3324	485.571	2306	1.4663	2306	2		3324	299.568	1.06571	485.571	#N/A	#N/A	51.4215	37.6348	50
3836	142.996	3836	1.02118	3836	42.2881	3330	1.86236	3330	2		3836	142.996	1.02118	42.2881	#N/A	#N/A	24.5456	47.8003	50
3580	290.044	3580	1.00346	3580	27.9831	2818	1.50692	2818	1		3580	290.044	1.00346	27.9831	#N/A	#N/A	49.7866	38.6774	25
4098	104.38	4098	1.03897	4098	118.049	4226	3.12277	4226	3		4098	104.38	1.03897	118.049	#N/A	#N/A	17.917	80.1506	75
2562	196.218	2562	1.03625	2562	80.1708	2178	1.89324	2178	3		2562	196.218	1.03625	80.1708	#N/A	#N/A	33.6812	48.5928	75
3586	329.569	3586	1.05241	3586	177.694	3138	1.96246	3138	2		3586	329.569	1.05241	177.694	#N/A	#N/A	56.5712	50.3695	50
2306	504.694	2306	1.00869	2306	55.3858	7234	1.6566	7234	2		2306	504.694	1.00869	55.3858	#N/A	#N/A	86.6317	42.5191	50
3330	276.313	3330	1.02721	3330	78.978	3650	2.21847	3650	3		3330	276.313	1.02721	78.978	#N/A	#N/A	47.4297	56.9403	75
2818	312.564	2818	1.04318	2818	228.016	2370	2.34409	2370	2		2818	312.564	1.04318	228.016	#N/A	#N/A	53.6522	60.1646	50
4226	88.3445	4226	1.02393	4226	55.5469	3394	2.62808	3394	1		4226	88.3445	1.02393	55.5469	#N/A	#N/A	15.1645	67.4536	25
2178	117.657	2178	1.02929	2178	124.1	2754	1.76438	2754	2		2178	117.657	1.02929	124.1	#N/A	#N/A	20.1961	45.2854	50
1410	0	1410	1.01847	1410	91.4553	2498	1.60658	2498	1		1410	0	1.01847	91.4553	#N/A	#N/A	0	41.2353	25
3138	403.748	3138	1.00458	3138	29.3557	3522	1.84925	3522	3		3138	403.748	1.00458	29.3557	#N/A	#N/A	69.3042	47.4638	75
7234	295.394	7234	1.03886	7234	36.4571	4130	1.97852	4130	4		7234	295.394	1.03886	36.4571	#N/A	#N/A	50.705	50.7817	100
3650	359.161	3650	1.03663	3650	119.558	2594	2.05395	2594	3		3650	359.161	1.03663	119.558	#N/A	#N/A	61.6507	52.7177	75
2370	129.245	2370	1.05605	2370	82.4293	3874	2.19999	3874	3		2370	129.245	1.05605	82.4293	#N/A	#N/A	22.1852	56.466	75
3394	86.387	3394	1.02716	3394	100.757	4258	1.90596	4258	2		3394	86.387	1.02716	100.757	#N/A	#N/A	14.8285	48.9193	50
2754	249.097	2754	1.02041	2754	115.624	674	1.90858	674	3		2754	249.097	1.02041	115.624	#N/A	#N/A	42.758	48.9866	75
2498	432.661	2498	1.07485	2498	571.272	2722	2.94467	2722	1		2498	432.661	1.07485	571.272	#N/A	#N/A	74.2671	75.5794	25
3522	278.025	3522	1.03458	3522	60.1866	3746	1.85904	3746	3		3522	278.025	1.03458	60.1866	#N/A	#N/A	47.7236	47.715	75
4130	141.795	4130	1.01511	4130	34.3797	3490	1.82913	3490	1		4130	141.795	1.01511	34.3797	#N/A	#N/A	24.3394	46.9474	25
2594	191.936	2594	1.0123	2594	52.0936	4194	1.59414	4194	1		2594	191.936	1.0123	52.0936	#N/A	#N/A	32.9462	40.916	25
3874	250.975	3874	1.02519	3874	112.228	3170	1.90278	3170	3		3874	250.975	1.02519	112.228	#N/A	#N/A	43.0804	48.8377	75
4258	392.997	4258	1.04044	4258	39.5119	3682	2.27214	3682	3		4258	392.997	1.04044	39.5119	#N/A	#N/A	67.4587	58.3179	75
674	160.694	674	1.01477	674	22.384	2402	1.62151	2402	1		674	160.694	1.01477	22.384	#N/A	#N/A	27.5834	41.6185	25
2722	430.929	2722	1.00512	2722	41.7332	3426	2.0553	3426	1		2722	430.929	1.00512	41.7332	#N/A	#N/A	73.9698	52.7523	25
3746	207.944	3746	1.03188	3746	31.1293	4322	2.23362	4322	2		3746	207.944	1.03188	31.1293	#N/A	#N/A	35.694	57.3292	50
3490	349.566	3490	1.03186	3490	65.0469	3810	2.33945	3810	3		3490	349.566	1.03186	65.0469	#N/A	#N/A	60.0037	60.0455	75
4194	269.53	4194	1.02784	4194	192.831	2530	1.96524	2530	3		4194	269.53	1.02784	192.831	#N/A	#N/A	46.2654	50.4408	75
3170	304.613	3170	1.04393	3170	73.668	4114	2.30989	4114	3		3170	304.613	1.04393	73.668	#N/A	#N/A	52.2874	59.2868	75
3682	130.483	3682	1.05059	3682	44.2491	3090	1.61022	3090	1		3682	130.483	1.05059	44.2491	#N/A	#N/A	22.3977	41.3287	25
2402	505.388	2402	1.07949	2402	274.388	2322	1.47634	2322	1		2402	505.388	1.07949	274.388	#N/A	#N/A	86.7509	37.8925	25
3426	258.071	3426	1.02956	3426	80.0891	1298	1.74828	1298	2		3426	258.071	1.02956	80.0891	#N/A	#N/A	44.2984	44.8722	50
4322	474.522	4322	1.04285	4322	44.0485	2834	2.28178	2834	3		4322	474.522	1.04285	44.0485	#N/A	#N/A	81.4527	58.5653	75
3810	229.575	3810	1.03083	3810	52.4933	4242	1.28604	4242	2		3810	229.575	1.03083	52.4933	#N/A	#N/A	39.407	33.0081	50
2530	110.666	2530	1.00952	2530	19.8564	2450	1.52828	2450	1		2530	110.666	1.00952	19.8564	#N/A	#N/A	18.996	39.2256	25
4114	267.319	4114	1.02144	4114	79.0973	3986	2.0464	3986	3		4114	267.319	1.02144	79.0973	#N/A	#N/A	45.8858	52.5239	75
3090	369.576	3090	1.05009	3090	107.161	4178	1.98309	4178	1		3090	369.576	1.05009	107.161	#N/A	#N/A	63.4385	50.899	25
2322	0	2322	1.02826	2322	222.433	2642	1.66105	2642	2		2322	0	1.02826	222.433	#N/A	#N/A	0	42.6333	50
1298	311.846	1298	1.02274	1298	71.0928	2898	1.47108	2898	1		1298	311.846	1.02274	71.0928	#N/A	#N/A	53.529	37.7575	25
2834	109.475	2834	1.01988	2834	37.1835	3922	2.0464	3922	3		2834	109.475	1.01988	37.1835	#N/A	#N/A	18.7916	52.5239	75
4242	524.423	4242	1.02109	4242	42.4841	4306	1.32723	4306	1		4242	524.423	1.02109	42.4841	#N/A	#N/A	90.0183	34.0653	25
2450	415.268	2450	1.03958	2450	421.115	3538	1.95989	3538	2		2450	415.268	1.03958	421.115	#N/A	#N/A	71.2816	50.3035	50
3986	175.816	3986	1.01113	3986	29.2639	4146	2.18055	4146	1		3986	175.816	1.01113	29.2639	#N/A	#N/A	30.1792	55.9671	25
4178	508.269	4178	1.01565	4178	66.4402	3378	1.89982	3378	2		4178	508.269	1.01565	66.4402	#N/A	#N/A	87.2454	48.7617	50
2642	390.811	2642	1.04014	2642	129.642	2866	1.83895	2866	3		2642	390.811	1.04014	129.642	#N/A	#N/A	67.0835	47.1994	75
2898	292.89	2898	1.04227	2898	223.146	3890	1.99603	3890	1		2898	292.89	1.04227	223.146	#N/A	#N/A	50.2752	51.2311	25
3922	177.249	3922	1.02929	3922	56.0059	4274	1.90322	4274	3		3922	177.249	1.02929	56.0059	#N/A	#N/A	30.4251	48.849	75
4306	139.788	4306	1.04957	4306	171.765	2226	2.41553	2226	2		4306	139.788	1.04957	171.765	#N/A	#N/A	23.9949	61.9982	50
3538	160.979	3538	1.06671	3538	63.768	3250	1.71701	3250	1		3538	160.979	1.06671	63.768	#N/A	#N/A	27.6324	44.0696	25
4146	269.377	4146	1.03894	4146	143.116	690	2.25732	690	2		4146	269.377	1.03894	143.116	#N/A	#N/A	46.2391	57.9375	50
3378	264.745	3378	1.00693	3378	15.2903	434	1.79761	434	1		3378	264.745	1.00693	15.2903	#N/A	#N/A	45.444	46.1383	25
2866	169.34	2866	1.05925	2866	120.707	2994	1.98299	2994	1		2866	169.34	1.05925	120.707	#N/A	#N/A	29.0676	50.8964	25
3890	352.344	3890	1.09273	3890	245.788	4210	3.17003	4210	2		3890	352.344	1.09273	245.788	#N/A	#N/A	60.4806	81.3636	50
4274	365.287	4274	1.01668	4274	31.0674	1138	1.80631	1138	2		4274	365.287	1.01668	31.0674	#N/A	#N/A	62.7022	46.3616	50
2226	246.927	2226	1.02895	2226	54.9495	3698	2.41709	3698	3		2226	246.927	1.02895	54.9495	#N/A	#N/A	42.3855	62.0382	75
3250	410.202	3250	1.04433	3250	51.3195	3442	2.02226	3442	1		3250	410.202	1.04433	51.3195	#N/A	#N/A	70.412	51.9043	25
690	152.429	690	1.01429	690	54.5428	4338	1.33994	4338	2		690	152.429	1.01429	54.5428	#N/A	#N/A	26.1647	34.3916	50
434	232.309	434	1.02239	434	93.7662	3570	2.12025	3570	2		434	232.309	1.02239	93.7662	#N/A	#N/A	39.8763	54.4194	50
2994	78.9134	2994	1.01422	2994	78.8769	4082	2.39317	4082	2		2994	78.9134	1.01422	78.8769	#N/A	#N/A	13.5456	61.4243	50
4210	117.866	4210	1.04426	4210	88.8846	2058	2.17334	2058	1		4210	117.866	1.04426	88.8846	#N/A	#N/A	20.2319	55.782	25
1138	192.061	1138	1.03813	1138	70.5696	3082	1.93689	3082	1		1138	192.061	1.03813	70.5696	#N/A	#N/A	32.9677	49.7132	25
3698	187.238	3698	1.06078	3698	105.295	522	2.0672	522	3		3698	187.238	1.06078	105.295	#N/A	#N/A	32.1398	53.0578	75
3442	393.191	3442	1.03576	3442	118.769	2570	1.75591	2570	3		3442	393.191	1.03576	118.769	#N/A	#N/A	67.492	45.0681	75
4338	567.59	4338	1.02945	4338	130.609	3594	1.9806	3594	2		4338	567.59	1.02945	130.609	#N/A	#N/A	97.428	50.8351	50
3570	229.445	3570	1.01639	3570	71.2801	3338	1.81219	3338	2		3570	229.445	1.01639	71.2801	#N/A	#N/A	39.3847	46.5126	50
4082	34.8208	4082	1.03951	4082	153.262	2826	1.96931	2826	1		4082	34.8208	1.03951	153.262	#N/A	#N/A	5.97706	50.5453	25
2058	248.16	2058	1.03961	2058	123.606	4234	1.57917	4234	2		2058	248.16	1.03961	123.606	#N/A	#N/A	42.5972	40.5318	50
3082	306.963	3082	1.05121	3082	173.746	1162	1.39859	1162	1		3082	306.963	1.05121	173.746	#N/A	#N/A	52.6908	35.8969	25
522	200.529	522	1.02602	522	68.5826	1418	1.98725	1418	3		522	200.529	1.02602	68.5826	#N/A	#N/A	34.4212	51.0057	75
2570	460.385	2570	1.00933	2570	25.1097	2954	1.61461	2954	1		2570	460.385	1.00933	25.1097	#N/A	#N/A	79.026	41.4414	25
3594	378.592	3594	1.01646	3594	43.4456	4170	1.67431	4170	1		3594	378.592	1.01646	43.4456	#N/A	#N/A	64.9861	42.9737	25
3338	365.042	3338	1.03194	3338	81.5756	330	1.76397	330	2		3338	365.042	1.03194	81.5756	#N/A	#N/A	62.6602	45.2749	50
2826	375.54	2826	1.05228	2826	159.18	4298	2.33972	4298	3		2826	375.54	1.05228	159.18	#N/A	#N/A	64.4622	60.0524	75
4234	13.3989	4234	1.04846	4234	135.719	3274	2.36706	3274	2		4234	13.3989	1.04846	135.719	#N/A	#N/A	2.29995	60.7541	50
1162	441.37	1162	1.05109	1162	63.2062	2762	1.54352	2762	2		1162	441.37	1.05109	63.2062	#N/A	#N/A	75.762	39.6167	50
1418	228.849	1418	1.02084	1418	63.18	3530	2.09355	3530	2		1418	228.849	1.02084	63.18	#N/A	#N/A	39.2824	53.7341	50
2954	262.447	2954	1.02518	2954	319.045	3626	1.37923	3626	1		2954	262.447	1.02518	319.045	#N/A	#N/A	45.0496	35.4	25
4170	549.647	4170	1.09105	4170	257.636	2858	2.15865	2858	2		4170	549.647	1.09105	257.636	#N/A	#N/A	94.348	55.405	50
330	168.095	330	1.03218	330	45.254	4266	2.53275	4266	1		330	168.095	1.03218	45.254	#N/A	#N/A	28.8538	65.0068	25
4298	249.748	4298	1.05696	4298	60.0335	4202	1.35532	4202	2		4298	249.748	1.05696	60.0335	#N/A	#N/A	42.8697	34.7863	50
3274	106.91	3274	1.02308	3274	48.2819	2410	2.08564	2410	3		3274	106.91	1.02308	48.2819	#N/A	#N/A	18.3513	53.5311	75
2762	457.995	2762	1.04246	2762	109.041	4330	1.47447	4330	1		2762	457.995	1.04246	109.041	#N/A	#N/A	78.6158	37.8445	25
3530	321.565	3530	1.01616	3530	51.965	1258	2.07337	1258	2		3530	321.565	1.01616	51.965	#N/A	#N/A	55.1973	53.2161	50
4138	201.104	4138	1.00922	4138	54.4647	3818	1.96578	3818	3		4138	201.104	1.00922	54.4647	#N/A	#N/A	34.5199	50.4547	75
3626	152.979	3626	1.02954	3626	242.512	1514	2.49424	1514	2		3626	152.979	1.02954	242.512	#N/A	#N/A	26.2592	64.0184	50
2858	138.254	2858	1.02247	2858	90.0837	3562	1.81851	3562	1		2858	138.254	1.02247	90.0837	#N/A	#N/A	23.7316	46.6748	25
4266	386.8	4266	1.09107	4266	110.166	4122	1.89005	4122	1		4266	386.8	1.09107	110.166	#N/A	#N/A	66.395	48.511	25
4202	111.743	4202	1.02779	4202	111.534	2330	1.69474	2330	2		4202	111.743	1.02779	111.534	#N/A	#N/A	19.1809	43.498	50
2410	271.86	2410	1.05361	2410	112.335	3866	1.53554	3866	1		2410	271.86	1.05361	112.335	#N/A	#N/A	46.6653	39.4119	25
4330	490.447	4330	1.04783	4330	234.475	4250	1.48021	4250	2		4330	490.447	1.04783	234.475	#N/A	#N/A	84.1862	37.9918	50
1258	150.521	1258	1.03597	1258	74.4998	2714	2.19871	2714	3		1258	150.521	1.03597	74.4998	#N/A	#N/A	25.8372	56.4332	75
3818	148.246	3818	1.03208	3818	35.652	2970	2.1883	2970	2		3818	148.246	1.03208	35.652	#N/A	#N/A	25.4467	56.166	50
1514	199.454	1514	1.04771	1514	120.26	1946	1.73332	1946	3		1514	199.454	1.04771	120.26	#N/A	#N/A	34.2367	44.4882	75
3562	195.585	3562	1.03889	3562	578.161	3994	1.89714	3994	2		3562	195.585	1.03889	578.161	#N/A	#N/A	33.5726	48.6929	50
4122	340.197	4122	1.04082	4122	499.257	4186	1.60101	4186	1		4122	340.197	1.04082	499.257	#N/A	#N/A	58.3955	41.0923	25
2330	77.4309	2330	1.02649	2330	228.402	3162	2.25872	3162	2		2330	77.4309	1.02649	228.402	#N/A	#N/A	13.2912	57.9734	50
3866	179.484	3866	1.04029	3866	206.121	602	1.29101	602	1		3866	179.484	1.04029	206.121	#N/A	#N/A	30.8088	33.1357	25
4250	513.803	4250	1.00104	4250	30.0646	2394	1.77449	2394	1		4250	513.803	1.00104	30.0646	#N/A	#N/A	88.1953	45.5449	25
2714	226.99	2714	1.01716	2714	55.8976	3418	1.30615	3418	1		2714	226.99	1.01716	55.8976	#N/A	#N/A	38.9633	33.5243	25
2970	384.446	2970	1.0287	2970	46.4975	3930	1.48597	3930	2		2970	384.446	1.0287	46.4975	#N/A	#N/A	65.9909	38.1396	50
1946	177.107	1946	1.05018	1946	80.6588	4314	1.66655	4314	3		1946	177.107	1.05018	80.6588	#N/A	#N/A	30.4008	42.7745	75
3994	223.425	3994	1.01162	3994	63.5068	3290	2.41777	3290	3		3994	223.425	1.01162	63.5068	#N/A	#N/A	38.3514	62.0557	75
4186	367.167	4186	1.03572	4186	150.528	3802	1.99541	3802	3		4186	367.167	1.03572	150.528	#N/A	#N/A	63.025	51.2152	75
3162	225.017	3162	1.03837	3162	58.1008	3034	2.9364	3034	2		3162	225.017	1.03837	58.1008	#N/A	#N/A	38.6246	75.3671	50
602	234.455	602	1.04534	602	127.96	4154	1.76737	4154	1		602	234.455	1.04534	127.96	#N/A	#N/A	40.2447	45.3622	25
2394	474.171	2394	1.04586	2394	182.226	3130	2.12995	3130	1		2394	474.171	1.04586	182.226	#N/A	#N/A	81.3924	54.6684	25
3418	205.896	3418	1.02565	3418	142.85	3642	1.77359	3642	2		3418	205.896	1.02565	142.85	#N/A	#N/A	35.3425	45.5218	50
3930	240.825	3930	1.01985	3930	48.6996	1338	1.95989	1338	2		3930	240.825	1.01985	48.6996	#N/A	#N/A	41.3381	50.3035	50
4314	419.244	4314	1.02999	4314	81.0241	3386	1.81844	3386	2		4314	419.244	1.02999	81.0241	#N/A	#N/A	71.9641	46.673	50
3290	339.827	3290	1.01041	3290	28.2229	2874	2.0589	2874	2		3290	339.827	1.01041	28.2229	#N/A	#N/A	58.332	52.8447	50
3802	87.3552	3802	1.00632	3802	19.558	4282	1.76435	4282	2		3802	87.3552	1.00632	19.558	#N/A	#N/A	14.9947	45.2847	50
3034	38.5272	3034	1.04108	3034	199.926	3258	2.04646	3258	2		3034	38.5272	1.04108	199.926	#N/A	#N/A	6.61327	52.5255	50
4154	371.362	4154	1.02799	4154	835.112	2746	1.43547	2746	1		4154	371.362	1.02799	835.112	#N/A	#N/A	63.745	36.8435	25
3130	316.52	3130	1.03231	3130	118.821	3770	2.26572	3770	2		3130	316.52	1.03231	118.821	#N/A	#N/A	54.3313	58.1531	50
3642	274.032	3642	1.01983	3642	59.2479	4218	3.12277	4218	3		3642	274.032	1.01983	59.2479	#N/A	#N/A	47.0381	80.1506	75
1338	153.838	1338	1.04577	1338	46.5724	3194	1.71716	3194	1		1338	153.838	1.04577	46.5724	#N/A	#N/A	26.4066	44.0735	25
3386	313.609	3386	1.03201	3386	88.7006	1274	1.64471	1274	2		3386	313.609	1.03201	88.7006	#N/A	#N/A	53.8316	42.2139	50
2874	202.463	2874	1.02645	2874	66.4708	1786	2.03121	1786	2		2874	202.463	1.02645	66.4708	#N/A	#N/A	34.7532	52.134	50
4282	350.817	4282	1.05074	4282	86.9387	3578	1.84086	3578	1		4282	350.817	1.05074	86.9387	#N/A	#N/A	60.2184	47.2484	25
3258	176.093	3258	1.02143	3258	88.2458	2042	1.90631	2042	2		3258	176.093	1.02143	88.2458	#N/A	#N/A	30.2267	48.9283	50
2746	329.472	2746	1.05448	2746	257.724	4090	2.75122	4090	3		2746	329.472	1.05448	257.724	#N/A	#N/A	56.5545	70.6142	75
3770	223.964	3770	1.02545	3770	49.2909	4102	2.27786	4102	3		3770	223.964	1.02545	49.2909	#N/A	#N/A	38.4439	58.4647	75
4218	82.7078	4218	1.05545	4218	82.7305	3078	1.32472	3078	1		4218	82.7078	1.05545	82.7305	#N/A	#N/A	14.197	34.0009	25
3194	461.961	3194	1.04598	3194	968.149	3590	2.64118	3590	3		3194	461.961	1.04598	968.149	#N/A	#N/A	79.2965	67.7898	75
4346	0	4346	1.03988	4346	167.008	2822	1.65424	2822	2		4346	0	1.03988	167.008	#N/A	#N/A	0	42.4585	50
1274	348.819	1274	1.04493	1274	27.5497	1798	1.85305	1798	1		1274	348.819	1.04493	27.5497	#N/A	#N/A	59.8755	47.5613	25
1786	329.117	1786	1.02119	1786	56.4237	4230	2.70648	4230	3		1786	329.117	1.02119	56.4237	#N/A	#N/A	56.4936	69.4659	75
3578	56.1589	3578	1.03404	3578	261.463	3718	2.07932	3718	1		3578	56.1589	1.03404	261.463	#N/A	#N/A	9.63979	53.3689	25
2042	284.522	2042	1.05146	2042	119.549	1414	1.87124	1414	2		2042	284.522	1.05146	119.549	#N/A	#N/A	48.8388	48.0282	50
4090	65.9428	4090	1.02623	4090	89.2861	3462	1.34448	3462	2		4090	65.9428	1.02623	89.2861	#N/A	#N/A	11.3192	34.5081	50
4102	125.73	4102	1.05693	4102	37.8852	3974	1.82808	3974	3		4102	125.73	1.05693	37.8852	#N/A	#N/A	21.5818	46.9204	75
3078	287.201	3078	1.03457	3078	144.92	70	2.18705	70	2		3078	287.201	1.03457	144.92	#N/A	#N/A	49.2986	56.1339	50
3590	81.3527	3590	1.01502	3590	64.4049	4166	1.42975	4166	1		3590	81.3527	1.01502	64.4049	#N/A	#N/A	13.9644	36.6967	25
2822	352.867	2822	1.03693	2822	105.566	1094	1.87259	1094	3		2822	352.867	1.03693	105.566	#N/A	#N/A	60.5703	48.0628	75
1798	201.562	1798	1.03382	1798	99.1141	3654	1.99541	3654	3		1798	201.562	1.03382	99.1141	#N/A	#N/A	34.5985	51.2152	75
4230	72.902	4230	1.0194	4230	46.1462	2374	2.39666	2374	3		4230	72.902	1.0194	46.1462	#N/A	#N/A	12.5138	61.5139	75
3718	141.69	3718	1.04077	3718	95.0328	3398	1.89242	3398	2		3718	141.69	1.04077	95.0328	#N/A	#N/A	24.3214	48.5718	50
1414	286.079	1414	1.04261	1414	41.9509	4294	1.99762	4294	3		1414	286.079	1.04261	41.9509	#N/A	#N/A	49.106	51.2719	75
3462	166.16	3462	1.04505	3462	160.652	2246	2.01325	2246	1		3462	166.16	1.04505	160.652	#N/A	#N/A	28.5217	51.6731	25
3974	169.019	3974	1.0431	3974	77.1823	2502	1.86357	2502	2		3974	169.019	1.0431	77.1823	#N/A	#N/A	29.0125	47.8313	50
70	276.849	70	1.02644	70	46.3651	3526	1.81905	3526	1		70	276.849	1.02644	46.3651	#N/A	#N/A	47.5217	46.6886	25
4166	551.175	4166	1.11137	4166	357.163	4134	1.47838	4134	2		4166	551.175	1.11137	357.163	#N/A	#N/A	94.6103	37.9448	50
1094	130.455	1094	1.01436	1094	33.1716	294	1.69755	294	2		1094	130.455	1.01436	33.1716	#N/A	#N/A	22.3929	43.5702	50
3654	83.483	3654	1.02977	3654	65.7564	3366	2.72542	3366	1		3654	83.483	1.02977	65.7564	#N/A	#N/A	14.33	69.952	25
2374	146.215	2374	1.01904	2374	51.8237	166	1.6012	166	2		2374	146.215	1.01904	51.8237	#N/A	#N/A	25.0981	41.0972	50
3398	402.198	3398	1.01461	3398	32.6078	4262	1.79053	4262	2		3398	402.198	1.01461	32.6078	#N/A	#N/A	69.0381	45.9566	50
4294	340.166	4294	1.01901	4294	19.9589	1190	1.75563	1190	2		4294	340.166	1.01901	19.9589	#N/A	#N/A	58.3902	45.0609	50
2246	516.981	2246	1.01971	2246	49.7055	3238	2.11148	3238	2		2246	516.981	1.01971	49.7055	#N/A	#N/A	88.7408	54.1943	50
2502	465.666	2502	1.0551	2502	122.576	2726	1.86649	2726	3		2502	465.666	1.0551	122.576	#N/A	#N/A	79.9325	47.9063	75
3526	301.012	3526	1.05565	3526	124.177	3750	1.78701	3750	1		3526	301.012	1.05565	124.177	#N/A	#N/A	51.6693	45.8663	25
4134	145.818	4134	1.01554	4134	60.4455	4198	1.70649	4198	1		4134	145.818	1.01554	60.4455	#N/A	#N/A	25.03	43.7996	25
294	294.509	294	1.04348	294	122.463	1126	1.62392	1126	1		294	294.509	1.04348	122.463	#N/A	#N/A	50.5531	41.6803	25
3366	0	3366	1.02318	3366	102.475	3174	1.8931	3174	3		3366	0	1.02318	102.475	#N/A	#N/A	0	48.5892	75
166	485.016	166	1.04102	166	61.044	3942	2.24494	3942	4		166	485.016	1.04102	61.044	#N/A	#N/A	83.254	57.6197	100
4262	394.48	4262	1.02417	4262	23.9771	230	1.25158	230	1		4262	394.48	1.02417	23.9771	#N/A	#N/A	67.7133	32.1237	25
1190	342.501	1190	1.02615	1190	28.3274	4326	2.27265	4326	4		1190	342.501	1.02615	28.3274	#N/A	#N/A	58.791	58.331	100
3238	0	3238	1.0312	3238	124.193	2534	1.68144	2534	1		3238	0	1.0312	124.193	#N/A	#N/A	0	43.1567	25
2726	447.718	2726	1.08561	2726	143.363	3558	1.18551	3558	1		2726	447.718	1.08561	143.363	#N/A	#N/A	76.8517	30.4279	25
3750	230.849	3750	1.05554	3750	172.117	3046	1.71216	3046	1		3750	230.849	1.05554	172.117	#N/A	#N/A	39.6257	43.9451	25
4198	163.885	4198	1.03822	4198	484.945	4118	2.16888	4118	2		4198	163.885	1.03822	484.945	#N/A	#N/A	28.1312	55.6675	50
1126	334.663	1126	1.02658	1126	179.217	3606	1.64787	3606	2		1126	334.663	1.02658	179.217	#N/A	#N/A	57.4456	42.295	50
3174	121.131	3174	1.03058	3174	48.7803	3862	1.6948	3862	1		3174	121.131	1.03058	48.7803	#N/A	#N/A	20.7924	43.4996	25
3942	98.216	3942	1.04592	3942	48.8938	4246	1.27573	4246	2		3942	98.216	1.04592	48.8938	#N/A	#N/A	16.859	32.7435	50
230	463.803	230	1.02396	230	67.2235	2198	2.32687	2198	3		230	463.803	1.02396	67.2235	#N/A	#N/A	79.6127	59.7226	75
4326	186.441	4326	1.06711	4326	82.1184	3734	1.84975	3734	2		4326	186.441	1.06711	82.1184	#N/A	#N/A	32.003	47.4766	50
2534	404.825	2534	1.03397	2534	238.845	3478	1.96555	3478	3		2534	404.825	1.03397	238.845	#N/A	#N/A	69.489	50.4488	75
3558	139.756	3558	1.03779	3558	209.927	3990	2.02371	3990	3		3558	139.756	1.03779	209.927	#N/A	#N/A	23.9894	51.9415	75
3046	428.636	3046	1.0385	3046	158.08	4182	1.45021	4182	1		3046	428.636	1.0385	158.08	#N/A	#N/A	73.5762	37.2218	25
4118	292.515	4118	1.00521	4118	25.0372	3158	1.64101	3158	1		4118	292.515	1.00521	25.0372	#N/A	#N/A	50.2108	42.119	25
3606	73.2497	3606	1.01602	3606	131.567	2646	1.54895	2646	1		3606	73.2497	1.01602	131.567	#N/A	#N/A	12.5735	39.7561	25
3862	163.733	3862	1.03998	3862	184.293	2390	1.72572	2390	1		3862	163.733	1.03998	184.293	#N/A	#N/A	28.1051	44.2932	25
4246	536.78	4246	1.05428	4246	176.588	1366	2.11671	1366	2		4246	536.78	1.05428	176.588	#N/A	#N/A	92.1394	54.3285	50
2198	190.212	2198	1.01462	2198	74.7687	3414	1.97043	3414	3		2198	190.212	1.01462	74.7687	#N/A	#N/A	32.6503	50.574	75
3734	216.396	3734	1.034	3734	44.0331	2902	1.64712	2902	1		3734	216.396	1.034	44.0331	#N/A	#N/A	37.1448	42.2758	25
3478	266.988	3478	1.02688	3478	26.6527	3926	2.35774	3926	2		3478	266.988	1.02688	26.6527	#N/A	#N/A	45.829	60.5149	50
3990	204.203	3990	1.02198	3990	52.0764	4310	2.27786	4310	3		3990	204.203	1.02198	52.0764	#N/A	#N/A	35.0519	58.4647	75
4182	456.456	4182	1.05391	4182	170.524	3286	2.07337	3286	2		4182	456.456	1.05391	170.524	#N/A	#N/A	78.3516	53.2161	50
3158	238.821	3158	1.03201	3158	437.18	3542	2.4051	3542	3		3158	238.821	1.03201	437.18	#N/A	#N/A	40.9941	61.7305	75
2646	429.667	2646	1.03892	2646	132.292	4150	2.01466	4150	1		2646	429.667	1.03892	132.292	#N/A	#N/A	73.7532	51.7093	25
2390	446.974	2390	1.02049	2390	338.788	1078	1.54288	1078	1		2390	446.974	1.02049	338.788	#N/A	#N/A	76.724	39.6003	25
1366	210.514	1366	1.01529	1366	43.2023	3126	1.66415	3126	1		1366	210.514	1.01529	43.2023	#N/A	#N/A	36.1352	42.7129	25
3414	142.056	3414	1.02546	3414	29.0696	3638	1.88567	3638	2		3414	142.056	1.02546	29.0696	#N/A	#N/A	24.3842	48.3985	50
2902	315.83	2902	1.03471	2902	252.52	1334	1.70406	1334	1		2902	315.83	1.03471	252.52	#N/A	#N/A	54.2129	43.7372	25
3926	38.5454	3926	1.02878	3926	119.053	3382	2.01857	3382	2		3926	38.5454	1.02878	119.053	#N/A	#N/A	6.6164	51.8096	50
4310	128.77	4310	1.02053	4310	18.0555	2870	1.58833	2870	1		4310	128.77	1.02053	18.0555	#N/A	#N/A	22.1036	40.7669	25
3286	153.768	3286	1.04344	3286	86.9717	182	1.98326	182	1		3286	153.768	1.04344	86.9717	#N/A	#N/A	26.3946	50.9033	25
3542	171.419	3542	1.06091	3542	98.1624	4278	1.8675	4278	1		3542	171.419	1.06091	98.1624	#N/A	#N/A	29.4244	47.9322	25
4150	295.809	4150	1.04249	4150	161.232	2230	2.14593	2230	1		4150	295.809	1.04249	161.232	#N/A	#N/A	50.7762	55.0785	25
1078	484.451	1078	1.0398	1078	175.73	3254	1.93757	3254	1		1078	484.451	1.0398	175.73	#N/A	#N/A	83.157	49.7306	25
3126	276.194	3126	1.04504	3126	158.265	1718	2.75122	1718	3		3126	276.194	1.04504	158.265	#N/A	#N/A	47.4093	70.6142	75
3638	239.904	3638	1.00715	3638	42.7445	2486	1.73242	2486	3		3638	239.904	1.00715	42.7445	#N/A	#N/A	41.18	44.4651	75
1334	348.009	1334	1.06281	1334	128.28	3510	1.65031	3510	1		1334	348.009	1.06281	128.28	#N/A	#N/A	59.7364	42.3577	25
3382	291.147	3382	1.01973	3382	37.77	2998	1.89005	2998	2		3382	291.147	1.01973	37.77	#N/A	#N/A	49.976	48.511	50
2870	376.647	2870	1.03001	2870	63.7826	4214	2.35925	4214	2		2870	376.647	1.03001	63.7826	#N/A	#N/A	64.6522	60.5537	50
182	450.793	182	1.02193	182	128.814	2166	1.74196	2166	1		182	450.793	1.02193	128.814	#N/A	#N/A	77.3795	44.71	25
4278	347.326	4278	1.04274	4278	97.3769	2678	1.79456	2678	1		4278	347.326	1.04274	97.3769	#N/A	#N/A	59.6192	46.0601	25
2230	524.61	2230	1.02609	2230	72.6019	3702	2.32287	3702	2		2230	524.61	1.02609	72.6019	#N/A	#N/A	90.0504	59.6199	50
3254	72.6717	3254	1.01934	3254	107.777	3446	2.00514	3446	1		3254	72.6717	1.01934	107.777	#N/A	#N/A	12.4742	51.4649	25
1718	64.2515	1718	1.05978	1718	77.9838	3318	1.9542	3318	2		1718	64.2515	1.05978	77.9838	#N/A	#N/A	11.0289	50.1575	50
2486	145.458	2486	1.00602	2486	17.9202	2550	2.40783	2550	2		2486	145.458	1.00602	17.9202	#N/A	#N/A	24.9682	61.8006	50
3510	63.0747	3510	1.01875	3510	94.4338	3574	2.00786	3574	3		3510	63.0747	1.01875	94.4338	#N/A	#N/A	10.8269	51.5347	75
2998	14.6266	2998	1.03145	2998	108.488	1014	1.8526	1014	2		2998	14.6266	1.03145	108.488	#N/A	#N/A	2.51069	47.5497	50
4214	118.968	4214	1.03546	4214	91.6507	2038	1.8931	2038	3		4214	118.968	1.03546	91.6507	#N/A	#N/A	20.4211	48.5892	75
2166	97.973	2166	1.02939	2166	191.176	3086	1.72714	3086	2		2166	97.973	1.02939	191.176	#N/A	#N/A	16.8173	44.3296	50
2678	375.282	2678	1.0363	2678	199.303	3342	1.57147	3342	1		2678	375.282	1.0363	199.303	#N/A	#N/A	64.4179	40.3341	25
3702	211.91	3702	1.05835	3702	117.409	2830	2.0224	2830	1		3702	211.91	1.05835	117.409	#N/A	#N/A	36.3748	51.9079	25
3446	208.146	3446	1.02672	3446	100.337	3854	1.64928	3854	1		3446	208.146	1.02672	100.337	#N/A	#N/A	35.7287	42.3312	25
4342	0	4342	1.05107	4342	110.408	4238	1.67119	4238	1		4342	0	1.05107	110.408	#N/A	#N/A	0	42.8936	25
3318	273.049	3318	1.02918	3318	85.5338	4174	1.45044	4174	1		3318	273.049	1.02918	85.5338	#N/A	#N/A	46.8694	37.2277	25
2550	161.093	2550	1.03691	2550	68.8742	3662	1.73694	3662	1		2550	161.093	1.03691	68.8742	#N/A	#N/A	27.6519	44.5812	25
3574	239.616	3574	1.00533	3574	47.5148	334	2.09355	334	2		3574	239.616	1.00533	47.5148	#N/A	#N/A	41.1306	53.7341	50
1014	483.988	1014	1.02291	1014	52.2058	846	1.53708	846	2		1014	483.988	1.02291	52.2058	#N/A	#N/A	83.0775	39.4515	50
2038	121.395	2038	1.02014	2038	40.7403	2894	1.53292	2894	1		2038	121.395	1.02014	40.7403	#N/A	#N/A	20.8377	39.3447	25
3086	341.137	3086	1.04286	3086	51.82	3918	1.72492	3918	2		3086	341.137	1.04286	51.82	#N/A	#N/A	58.5569	44.2727	50
3342	415.316	3342	1.06936	3342	220.17	4302	1.85904	4302	3		3342	415.316	1.06936	220.17	#N/A	#N/A	71.2898	47.715	75
2830	446.424	2830	1.08696	2830	114.289	3278	2.09294	3278	3		2830	446.424	1.08696	114.289	#N/A	#N/A	76.6296	53.7184	75
3854	106.36	3854	1.0379	3854	157.882	2510	2.9364	2510	2		3854	106.36	1.0379	157.882	#N/A	#N/A	18.2569	75.3671	50
4238	119.274	4238	1.03244	4238	250.132	3534	2.4613	3534	1		4238	119.274	1.03244	250.132	#N/A	#N/A	20.4736	63.1729	25
4174	528.858	4174	1.03864	4174	101.922	4142	2.28105	4142	1		4174	528.858	1.03864	101.922	#N/A	#N/A	90.7795	58.5466	25
3662	98.5399	3662	1.02084	3662	146.179	1070	2.13815	1070	2		3662	98.5399	1.02084	146.179	#N/A	#N/A	16.9146	54.8788	50
334	312.624	334	1.06681	334	102.729	3630	2.07928	3630	2		334	312.624	1.06681	102.729	#N/A	#N/A	53.6625	53.3678	50
846	471.108	846	1.04239	846	254.695	302	2.17262	302	2		846	471.108	1.04239	254.695	#N/A	#N/A	80.8666	55.7635	50
2894	290.112	2894	1.03948	2894	356.405	2350	1.64867	2350	1		2894	290.112	1.03948	356.405	#N/A	#N/A	49.7983	42.3156	25
3918	127.31	3918	1.03436	3918	243.916	2862	2.15571	2862	2		3918	127.31	1.03436	243.916	#N/A	#N/A	21.853	55.3295	50
4302	208.057	4302	1.0032	4302	12.9674	4270	1.52687	4270	2		4302	208.057	1.0032	12.9674	#N/A	#N/A	35.7134	39.1894	50
3278	126.527	3278	1.02107	3278	40.2033	3246	1.88712	3246	3		3278	126.527	1.02107	40.2033	#N/A	#N/A	21.7186	48.4358	75
2510	48.4255	2510	1.03641	2510	130.011	3758	1.7651	3758	3		2510	48.4255	1.03641	130.011	#N/A	#N/A	8.31233	45.3039	75
3534	345.854	3534	1.00977	3534	43.7465	4206	1.78667	4206	3		3534	345.854	1.00977	43.7465	#N/A	#N/A	59.3665	45.8576	75
4142	253.468	4142	1.05343	4142	149.543	3182	2.02033	3182	2		4142	253.468	1.05343	149.543	#N/A	#N/A	43.5083	51.8548	50
1070	203.021	1070	1.013	1070	39.8219	3438	1.65022	3438	2		1070	203.021	1.013	39.8219	#N/A	#N/A	34.849	42.3554	50
3630	0	3630	1.03159	3630	135.682	1902	3.54108	1902	1		3630	0	1.03159	135.682	#N/A	#N/A	0	90.8871	25
302	302.129	302	1.03565	302	64.4082	4334	2.17938	4334	2		302	302.129	1.03565	64.4082	#N/A	#N/A	51.8611	55.937	50
2350	482.286	2350	1.06408	2350	425.555	3310	2.32774	3310	2		2350	482.286	1.06408	425.555	#N/A	#N/A	82.7854	59.7449	50
2862	145.928	2862	1.05351	2862	70.2775	3566	2.01215	3566	3		2862	145.928	1.05351	70.2775	#N/A	#N/A	25.0488	51.6448	75
4270	378.775	4270	1.04506	4270	22.9137	4126	2.37784	4126	1		4270	378.775	1.04506	22.9137	#N/A	#N/A	65.0175	61.0308	25
3246	354.072	3246	1.02118	3246	54.3571	3102	2.52505	3102	2		3246	354.072	1.02118	54.3571	#N/A	#N/A	60.7772	64.8092	50
3758	303.82	3758	1.04646	3758	60.206	4254	1.6913	4254	1		3758	303.82	1.04646	60.206	#N/A	#N/A	52.1513	43.4097	25
4206	141.758	4206	1.01553	4206	40.6301	1694	1.48562	1694	2		4206	141.758	1.01553	40.6301	#N/A	#N/A	24.333	38.1307	50
3182	365.564	3182	1.00451	3182	15.6938	2974	1.85905	2974	1		3182	365.564	1.00451	15.6938	#N/A	#N/A	62.7498	47.7153	25
3438	374.824	3438	1.01148	3438	29.4881	3998	2.33346	3998	1		3438	374.824	1.01148	29.4881	#N/A	#N/A	64.3393	59.8917	25
1902	115.832	1902	1.02892	1902	100.051	4190	1.62031	4190	1		1902	115.832	1.02892	100.051	#N/A	#N/A	19.8828	41.5877	25
4334	17.3219	4334	1.0356	4334	120.186	2398	2.30327	2398	3		4334	17.3219	1.0356	120.186	#N/A	#N/A	2.97334	59.1169	75
3310	233.242	3310	1.0131	3310	75.766	3422	1.80081	3422	3		3310	233.242	1.0131	75.766	#N/A	#N/A	40.0365	46.2205	75
3566	170.387	3566	1.05038	3566	67.3017	3934	1.8892	3934	2		3566	170.387	1.05038	67.3017	#N/A	#N/A	29.2473	48.4891	50
4126	199.802	4126	1.07469	4126	391.13	4318	1.88901	4318	3		4126	199.802	1.07469	391.13	#N/A	#N/A	34.2964	48.4843	75
3102	200.495	3102	1.02039	3102	34.0848	1246	1.81271	1246	2		3102	200.495	1.02039	34.0848	#N/A	#N/A	34.4154	46.5259	50
4254	439.48	4254	1.05229	4254	268.797	3294	1.7991	3294	2		4254	439.48	1.05229	268.797	#N/A	#N/A	75.4376	46.1766	50
1694	239.547	1694	1.02488	1694	68.9773	3806	2.31602	3806	3		1694	239.547	1.02488	68.9773	#N/A	#N/A	41.1187	59.4441	75
2974	429.39	2974	1.00912	2974	55.3285	4062	1.87238	4062	3		2974	429.39	1.00912	55.3285	#N/A	#N/A	73.7057	48.0574	75
3998	251.026	3998	1.04697	3998	207.198	2110	1.47045	2110	2		3998	251.026	1.04697	207.198	#N/A	#N/A	43.0891	37.7413	50
4190	310.305	4190	1.03169	4190	253.312	3646	2.00046	3646	1		4190	310.305	1.03169	253.312	#N/A	#N/A	53.2645	51.3448	25
2398	218.741	2398	1.02807	2398	38.8224	2878	1.452	2878	1		2398	218.741	1.02807	38.8224	#N/A	#N/A	37.5473	37.2678	25
3422	240.026	3422	1.03606	3422	83.0543	4286	1.67384	4286	2		3422	240.026	1.03606	83.0543	#N/A	#N/A	41.2009	42.9616	50
3934	275.148	3934	1.03686	3934	80.0185	2494	2.09307	2494	2		3934	275.148	1.03686	80.0185	#N/A	#N/A	47.2297	53.7218	50
4318	413.148	4318	1.00837	4318	23.2758	3518	1.70943	3518	2		4318	413.148	1.00837	23.2758	#N/A	#N/A	70.9177	43.8751	50
1246	103.154	1246	1.03408	1246	76.6063	4222	2.79385	4222	2		1246	103.154	1.03408	76.6063	#N/A	#N/A	17.7066	71.7083	50
3294	374.355	3294	1.03464	3294	53.8195	2686	1.66655	2686	3		3294	374.355	1.03464	53.8195	#N/A	#N/A	64.2588	42.7745	75
3806	201.251	3806	1.01885	3806	46.8528	2302	3.46037	2302	3		3806	201.251	1.01885	46.8528	#N/A	#N/A	34.5451	88.8156	75
4062	317.095	4062	1.03713	4062	80.9885	4094	2.64118	4094	3		4062	317.095	1.03713	80.9885	#N/A	#N/A	54.43	67.7898	75
2110	15.8747	2110	1.02172	2110	86.4849	4097	1.58734	4097	2		2110	15.8747	1.02172	86.4849	#N/A	#N/A	2.72492	40.7415	50
3646	292.302	3646	1.04464	3646	198.019	2561	1.47329	2561	1		3646	292.302	1.04464	198.019	#N/A	#N/A	50.1742	37.8142	25
2878	450.29	2878	1.03619	2878	92.0022	257	2.92197	257	1		2878	450.29	1.03619	92.0022	#N/A	#N/A	77.2932	74.9967	25
4286	332.858	4286	1.0267	4286	30.4611	2305	1.4663	2305	2		4286	332.858	1.0267	30.4611	#N/A	#N/A	57.1357	37.6348	50
2494	15.5578	2494	1.03328	2494	181.164	4225	2.7533	4225	2		2494	15.5578	1.03328	181.164	#N/A	#N/A	2.67053	70.6676	50
3518	245.922	3518	1.01818	3518	57.5348	2177	1.4336	2177	1		3518	245.922	1.01818	57.5348	#N/A	#N/A	42.213	36.7955	25
4222	107.039	4222	1.03825	4222	86.7888	3201	1.73242	3201	3		4222	107.039	1.03825	86.7888	#N/A	#N/A	18.3735	44.4651	75
2686	418.207	2686	1.0216	2686	27.4196	2689	1.98136	2689	1		2686	418.207	1.0216	27.4196	#N/A	#N/A	71.7861	50.8546	25
4350	56.511	4350	1.04824	4350	52.8802	3713	1.8543	3713	1		4350	56.511	1.04824	52.8802	#N/A	#N/A	9.70023	47.5934	25
2302	111.741	2302	1.05812	2302	82.5684	1409	1.80081	1409	3		2302	111.741	1.05812	82.5684	#N/A	#N/A	19.1806	46.2205	75
4094	75.1568	4094	1.03552	4094	49.7692	4161	1.22598	4161	1		4094	75.1568	1.03552	49.7692	#N/A	#N/A	12.9008	31.4666	25
4097	135.637	4097	1.04767	4097	254.754	1089	1.86649	1089	3		4097	135.637	1.04767	254.754	#N/A	#N/A	23.2824	47.9063	75
2561	390.242	2561	1.04026	2561	357.46	7233	1.6566	7233	2		2561	390.242	1.04026	357.46	#N/A	#N/A	66.9858	42.5191	50
257	438.041	257	1.01368	257	28.7909	3649	2.41406	3649	1		257	438.041	1.01368	28.7909	#N/A	#N/A	75.1906	61.9605	25
2305	498.595	2305	1.01209	2305	26.1371	3393	2.2446	3393	2		2305	498.595	1.01209	26.1371	#N/A	#N/A	85.5848	57.611	50
4225	98.9566	4225	1.05831	4225	110.169	2881	1.87356	2881	3		4225	98.9566	1.05831	110.169	#N/A	#N/A	16.9861	48.0877	75
2177	546.628	2177	1.06095	2177	200.906	4289	2.19122	4289	2		2177	546.628	1.06095	200.906	#N/A	#N/A	93.8298	56.2409	50
3201	143.179	3201	1.03833	3201	53.4067	2753	1.68396	2753	2		3201	143.179	1.03833	53.4067	#N/A	#N/A	24.577	43.2214	50
2689	435.256	2689	1.02688	2689	112.675	4129	1.92297	4129	1		2689	435.256	1.02688	112.675	#N/A	#N/A	74.7126	49.3559	25
3713	384.237	3713	1.04795	3713	441.125	2593	1.47878	2593	1		3713	384.237	1.04795	441.125	#N/A	#N/A	65.9551	37.9551	25
1409	234.895	1409	1.01113	1409	27.0512	2337	2.09307	2337	2		1409	234.895	1.01113	27.0512	#N/A	#N/A	40.3202	53.7218	50
4161	525.796	4161	1.0109	4161	45.0314	2849	1.97543	2849	2		4161	525.796	1.0109	45.0314	#N/A	#N/A	90.2539	50.7024	50
1089	451.474	1089	1.00376	1089	29.6857	3873	1.83936	3873	1		1089	451.474	1.00376	29.6857	#N/A	#N/A	77.4964	47.2099	25
7233	296.077	7233	1.01397	7233	25.4369	4257	1.90596	4257	2		7233	296.077	1.01397	25.4369	#N/A	#N/A	50.8222	48.9193	50
3649	346.984	3649	1.05751	3649	106.687	2721	2.15571	2721	2		3649	346.984	1.05751	106.687	#N/A	#N/A	59.5605	55.3295	50
3393	365.147	3393	1.04128	3393	35.5052	1697	2.07056	1697	2		3393	365.147	1.04128	35.5052	#N/A	#N/A	62.6782	53.144	50
2881	229.796	2881	1.03394	2881	99.0821	3745	1.94331	3745	1		2881	229.796	1.03394	99.0821	#N/A	#N/A	39.4449	49.878	25
4289	318.103	4289	1.02494	4289	40.4434	3489	2.25658	3489	2		4289	318.103	1.02494	40.4434	#N/A	#N/A	54.603	57.9185	50
2753	369.525	2753	1.04091	2753	54.5647	2977	1.73473	2977	3		2753	369.525	1.04091	54.5647	#N/A	#N/A	63.4297	44.5244	75
4129	169.501	4129	1.06612	4129	128.26	1953	2.22403	1953	2		4129	169.501	1.06612	128.26	#N/A	#N/A	29.0952	57.0831	50
2593	369.64	2593	1.02619	2593	259.367	4193	1.28583	4193	1		2593	369.64	1.02619	259.367	#N/A	#N/A	63.4495	33.0027	25
2337	27.5672	2337	1.05128	2337	181.956	2145	1.64787	2145	2		2337	27.5672	1.05128	181.956	#N/A	#N/A	4.73197	42.295	50
2849	114.207	2849	1.01866	2849	99.1995	3681	1.54007	3681	2		2849	114.207	1.01866	99.1995	#N/A	#N/A	19.6039	39.5282	50
3873	237.537	3873	1.05492	3873	134.025	3425	2.21132	3425	3		3873	237.537	1.05492	134.025	#N/A	#N/A	40.7737	56.7568	75
4257	396.923	4257	1.00615	4257	13.6789	3937	2.15337	3937	2		4257	396.923	1.00615	13.6789	#N/A	#N/A	68.1326	55.2695	50
2721	150.531	2721	1.06044	2721	36.546	4321	2.23362	4321	2		2721	150.531	1.06044	36.546	#N/A	#N/A	25.8389	57.3292	50
1697	311.784	1697	1.02881	1697	121.344	3297	2.16237	3297	3		1697	311.784	1.02881	121.344	#N/A	#N/A	53.5184	55.5005	75
3745	200.664	3745	1.03672	3745	129.83	3809	1.32432	3809	2		3745	200.664	1.03672	129.83	#N/A	#N/A	34.4444	33.9907	50
3489	339.83	3489	1.0547	3489	67.6259	2529	2.79096	2529	3		3489	339.83	1.0547	67.6259	#N/A	#N/A	58.3325	71.6342	75
2977	56.0373	2977	1.03069	2977	84.7789	4113	2.40783	4113	2		2977	56.0373	1.03069	84.7789	#N/A	#N/A	9.61892	61.8006	50
1953	53.9274	1953	1.05403	1953	97.4116	2577	1.76438	2577	2		1953	53.9274	1.05403	97.4116	#N/A	#N/A	9.25675	45.2854	50
4193	286.27	4193	1.03675	4193	165.107	2833	2.28178	2833	3		4193	286.27	1.03675	165.107	#N/A	#N/A	49.1388	58.5653	75
2145	63.3796	2145	1.01678	2145	85.4661	4241	1.94329	4241	2		2145	63.3796	1.01678	85.4661	#N/A	#N/A	10.8792	49.8774	50
3681	137.033	3681	1.03883	3681	131.585	1681	1.99541	1681	3		3681	137.033	1.03883	131.585	#N/A	#N/A	23.522	51.2152	75
3425	202.472	3425	1.01952	3425	38.0463	2961	1.54999	2961	2		3425	202.472	1.01952	38.0463	#N/A	#N/A	34.7547	39.7828	50
3937	309.275	3937	1.0321	3937	52.752	3985	1.77698	3985	2		3937	309.275	1.0321	52.752	#N/A	#N/A	53.0877	45.6088	50
4321	473.525	4321	1.01025	4321	30.2922	4177	1.68379	4177	1		4321	473.525	1.01025	30.2922	#N/A	#N/A	81.2815	43.217	25
3297	393.291	3297	1.02649	3297	101.723	3153	2.21132	3153	3		3297	393.291	1.02649	101.723	#N/A	#N/A	67.5092	56.7568	75
3809	214.425	3809	1.0015	3809	23.5935	849	2.01215	849	3		3809	214.425	1.0015	23.5935	#N/A	#N/A	36.8065	51.6448	75
2529	59.3116	2529	1.06377	2529	60.031	3921	1.8571	3921	2		2529	59.3116	1.06377	60.031	#N/A	#N/A	10.181	47.6652	50
4113	157.969	4113	1.02946	4113	53.4857	4305	2.01191	4305	3		4113	157.969	1.02946	53.4857	#N/A	#N/A	27.1157	51.6387	75
2577	258.43	2577	1.02516	2577	64.7408	2257	1.21498	2257	2		2577	258.43	1.02516	64.7408	#N/A	#N/A	44.36	31.1843	50
2833	102.838	2833	1.01138	2833	40.8492	3281	2.24353	3281	3		2833	102.838	1.01138	40.8492	#N/A	#N/A	17.6523	57.5836	75
4241	523.145	4241	1.02337	4241	47.7778	3793	1.68656	3793	3		4241	523.145	1.02337	47.7778	#N/A	#N/A	89.7989	43.2881	75
1681	82.8015	1681	1.02014	1681	39.3724	3537	1.97342	3537	1		1681	82.8015	1.02014	39.3724	#N/A	#N/A	14.213	50.6508	25
2961	320.181	2961	1.02501	2961	213.271	4049	2.30989	4049	3		2961	320.181	1.02501	213.271	#N/A	#N/A	54.9597	59.2868	75
3985	164.308	3985	1.05044	3985	111.59	4145	2.57752	4145	1		3985	164.308	1.05044	111.59	#N/A	#N/A	28.2038	66.1559	25
4177	516.402	4177	1.06209	4177	167.053	2097	2.09254	2097	2		4177	516.402	1.06209	167.053	#N/A	#N/A	88.6414	53.7082	50
3153	197.443	3153	1.02621	3153	149.272	1073	2.01191	1073	3		3153	197.443	1.02621	149.272	#N/A	#N/A	33.8915	51.6387	75
849	168.172	849	1.02282	849	61.0381	3121	2.15679	3121	3		849	168.172	1.02282	61.0381	#N/A	#N/A	28.8671	55.3572	75
3921	164.134	3921	1.02302	3921	121.437	3633	2.00786	3633	3		3921	164.134	1.02302	121.437	#N/A	#N/A	28.1739	51.5347	75
4305	239.866	4305	1.02658	4305	42.9672	2353	1.81746	2353	2		4305	239.866	1.02658	42.9672	#N/A	#N/A	41.1735	46.6478	50
2257	61.312	2257	1.02451	2257	162.443	4273	1.90322	4273	3		2257	61.312	1.02451	162.443	#N/A	#N/A	10.5243	48.849	75
3281	141.932	3281	1.05367	3281	59.3127	3249	1.7099	3249	1		3281	141.932	1.05367	59.3127	#N/A	#N/A	24.3629	43.8871	25
3793	54.7447	3793	1.03638	3793	28.885	689	1.88468	689	1		3793	54.7447	1.03638	28.885	#N/A	#N/A	9.39704	48.3731	25
3537	376.554	3537	1.05044	3537	121.184	1713	1.74435	1713	1		3537	376.554	1.05044	121.184	#N/A	#N/A	64.6363	44.7714	25
4049	264.032	4049	1.01438	4049	39.2289	3761	2.60896	3761	1		4049	264.032	1.01438	39.2289	#N/A	#N/A	45.3216	66.9629	25
4145	269.421	4145	1.01546	4145	69.0052	433	2.0464	433	3		4145	269.421	1.01546	69.0052	#N/A	#N/A	46.2467	52.5239	75
2097	175.078	2097	1.02311	2097	76.3056	2481	1.47793	2481	1		2097	175.078	1.02311	76.3056	#N/A	#N/A	30.0525	37.9333	25
1073	232.652	1073	1.02762	1073	73.549	4209	3.89613	4209	4		1073	232.652	1.02762	73.549	#N/A	#N/A	39.9352	100	100
3121	88.5688	3121	1.01971	3121	84.7792	2161	1.81746	2161	2		3121	88.5688	1.01971	84.7792	#N/A	#N/A	15.203	46.6478	50
3633	232.423	3633	1.03471	3633	108.43	1137	2.49116	1137	1		3633	232.423	1.03471	108.43	#N/A	#N/A	39.8959	63.9393	25
2353	76.6395	2353	1.0233	2353	106.887	2417	2.20476	2417	2		2353	76.6395	1.0233	106.887	#N/A	#N/A	13.1553	56.5885	50
4273	365.319	4273	1.01141	4273	23.3868	3441	2.20763	3441	1		4273	365.319	1.01141	23.3868	#N/A	#N/A	62.7077	56.6621	25
3249	405.803	3249	1.03952	3249	146.993	4337	0.991322	4337	1		3249	405.803	1.03952	146.993	#N/A	#N/A	69.6569	25.4438	25
689	144.944	689	1.01675	689	79.9227	3313	2.05886	3313	3		689	144.944	1.01675	79.9227	#N/A	#N/A	24.8799	52.8437	75
1713	248.486	1713	1.02452	1713	65.0899	2801	2.67738	2801	2		1713	248.486	1.02452	65.0899	#N/A	#N/A	42.6531	68.719	50
3761	320.328	3761	1.00588	3761	45.0491	4105	1.84137	4105	1		3761	320.328	1.00588	45.0491	#N/A	#N/A	54.9849	47.2615	25
433	180.696	433	1.01826	433	24.5577	521	1.90858	521	3		433	180.696	1.01826	24.5577	#N/A	#N/A	31.0168	48.9866	75
2481	493.172	2481	1.0339	2481	54.5841	2569	2.11915	2569	2		2481	493.172	1.0339	54.5841	#N/A	#N/A	84.654	54.3912	50
4209	142.5	4209	1.01737	4209	40.7397	265	1.93915	265	1		4209	142.5	1.01737	40.7397	#N/A	#N/A	24.4604	49.7712	25
2161	86.3909	2161	1.01046	2161	72.6673	2825	1.53132	2825	1		2161	86.3909	1.01046	72.6673	#N/A	#N/A	14.8292	39.3036	25
1137	371.859	1137	1.00573	1137	34.8758	4233	1.57917	4233	2		1137	371.859	1.00573	34.8758	#N/A	#N/A	63.8303	40.5318	50
2417	251.132	2417	1.05563	2417	83.4352	2697	1.80444	2697	1		2417	251.132	1.05563	83.4352	#N/A	#N/A	43.1073	46.3136	25
3441	394.232	3441	1.05842	3441	234.092	2953	1.6575	2953	1		3441	394.232	1.05842	234.092	#N/A	#N/A	67.6707	42.5422	25
4337	20.6016	4337	1.03312	4337	151.004	4169	1.26527	4169	1		4337	20.6016	1.03312	151.004	#N/A	#N/A	3.53631	32.475	25
3313	241.908	3313	1.04266	3313	101.985	3657	2.12117	3657	3		3313	241.908	1.04266	101.985	#N/A	#N/A	41.524	54.443	75
2801	440.734	2801	1.03638	2801	52.8093	2377	1.46839	2377	1		2801	440.734	1.03638	52.8093	#N/A	#N/A	75.6529	37.6884	25
4105	202.452	4105	1.04801	4105	86.3114	3401	2.36706	3401	2		4105	202.452	1.04801	86.3114	#N/A	#N/A	34.7513	60.7541	50
521	153.034	521	1.04278	521	83.2997	4297	1.84925	4297	3		521	153.034	1.04278	83.2997	#N/A	#N/A	26.2686	47.4638	75
2569	223.197	2569	1.01018	2569	45.093	2249	3.35567	2249	4		2569	223.197	1.01018	45.093	#N/A	#N/A	38.3122	86.1283	100
265	404.611	265	1.06508	265	167.615	2761	2.15107	2761	2		265	404.611	1.06508	167.615	#N/A	#N/A	69.4523	55.2104	50
2825	58.6528	2825	1.02633	2825	160.806	2505	1.33422	2505	1		2825	58.6528	1.02633	160.806	#N/A	#N/A	10.0679	34.2448	25
4233	24.8889	4233	1.05088	4233	87.3345	3529	1.98738	3529	2		4233	24.8889	1.05088	87.3345	#N/A	#N/A	4.27223	51.0091	50
2697	272.333	2697	1.04093	2697	65.9725	3113	2.15921	3113	2		2697	272.333	1.04093	65.9725	#N/A	#N/A	46.7465	55.4194	50
2953	260.426	2953	1.02192	2953	325.334	297	1.88606	297	2		2953	260.426	1.02192	325.334	#N/A	#N/A	44.7026	48.4085	50
4169	568.222	4169	1.04191	4169	66.1956	4265	2.2493	4265	2		4169	568.222	1.04191	66.1956	#N/A	#N/A	97.5365	57.7316	50
3657	92.5142	3657	1.0495	3657	56.0699	2217	1.89324	2217	3		3657	92.5142	1.0495	56.0699	#N/A	#N/A	15.8802	48.5928	75
2377	540.198	2377	1.04116	2377	607.255	2729	1.83895	2729	3		2377	540.198	1.04116	607.255	#N/A	#N/A	92.7261	47.1994	75
3401	110	3401	1.01173	3401	37.3538	3753	2.19999	3753	3		3401	110	1.01173	37.3538	#N/A	#N/A	18.8817	56.466	75
4297	265.902	4297	1.05179	4297	126.604	4201	1.35532	4201	2		4297	265.902	1.05179	126.604	#N/A	#N/A	45.6426	34.7863	50
2249	88.9458	2249	1.02935	2249	68.4544	1129	1.91874	1129	2		2249	88.9458	1.02935	68.4544	#N/A	#N/A	15.2677	49.2473	50
2761	235.714	2761	1.03861	2761	32.8868	3177	2.26031	3177	1		2761	235.714	1.03861	32.8868	#N/A	#N/A	40.4608	58.0142	25
2505	491.352	2505	1.00922	2505	45.2556	3689	2.49668	3689	2		2505	491.352	1.00922	45.2556	#N/A	#N/A	84.3416	64.081	50
3529	9.17052	3529	1.03292	3529	103.679	2409	1.43859	2409	2		3529	9.17052	1.03292	103.679	#N/A	#N/A	1.57414	36.9236	50
4137	184.352	4137	1.04513	4137	252.821	3433	1.88904	3433	1		4137	184.352	1.04513	252.821	#N/A	#N/A	31.6444	48.485	25
3113	69.8628	3113	1.02216	3113	90.5785	2921	1.62167	2921	1		3113	69.8628	1.02216	90.5785	#N/A	#N/A	11.9921	41.6226	25
297	151.226	297	1.0051	297	26.6951	3945	1.83217	3945	1		297	151.226	1.0051	26.6951	#N/A	#N/A	25.9582	47.0254	25
4265	392.044	4265	1.02263	4265	49.1162	233	1.73473	233	3		4265	392.044	1.02263	49.1162	#N/A	#N/A	67.2951	44.5244	75
2217	125.688	2217	1.02113	2217	68.031	4329	1.07884	4329	1		2217	125.688	1.02113	68.031	#N/A	#N/A	21.5746	27.69	25
2729	175.865	2729	1.00671	2729	28.0549	745	1.32703	745	1		2729	175.865	1.00671	28.0549	#N/A	#N/A	30.1876	34.0602	25
3753	257.166	3753	1.03117	3753	58.34	2793	1.66436	2793	3		3753	257.166	1.03117	58.34	#N/A	#N/A	44.1431	42.7183	75
4201	125.349	4201	1.02079	4201	87.9584	3817	1.7651	3817	3		4201	125.349	1.02079	87.9584	#N/A	#N/A	21.5164	45.3039	75
1129	76.2797	1129	1.0158	1129	84.7104	2537	1.45281	2537	2		1129	76.2797	1.0158	84.7104	#N/A	#N/A	13.0936	37.2885	50
3177	337.996	3177	1.05433	3177	121.949	3561	2.32287	3561	2		3177	337.996	1.05433	121.949	#N/A	#N/A	58.0177	59.6199	50
3689	154.286	3689	1.03999	3689	53.1867	4121	2.05283	4121	1		3689	154.286	1.03999	53.1867	#N/A	#N/A	26.4835	52.689	25
2409	109.679	2409	1.04018	2409	116.374	3097	1.83219	3097	2		2409	109.679	1.04018	116.374	#N/A	#N/A	18.8266	47.0259	50
3433	326.973	3433	1.03917	3433	186.921	4249	1.47438	4249	2		3433	326.973	1.03917	186.921	#N/A	#N/A	56.1256	37.8422	50
2921	431.447	2921	1.05831	2921	60.8737	3225	1.48504	3225	1		2921	431.447	1.05831	60.8737	#N/A	#N/A	74.0587	38.1158	25
3945	379.239	3945	1.02909	3945	602.286	2969	2.1883	2969	2		3945	379.239	1.02909	602.286	#N/A	#N/A	65.0971	56.166	50
233	66.5554	233	1.0135	233	34.3906	1945	1.90858	1945	3		233	66.5554	1.0135	34.3906	#N/A	#N/A	11.4244	48.9866	75
4329	514.802	4329	1.02373	4329	54.7848	4185	1.60994	4185	1		4329	514.802	1.02373	54.7848	#N/A	#N/A	88.3668	41.3215	25
745	518.55	745	1.03973	745	90.1605	3673	2.44294	3673	4		745	518.55	1.03973	90.1605	#N/A	#N/A	89.0102	62.7017	100
2793	363.191	2793	1.0091	2793	30.5497	3417	2.24795	3417	3		2793	363.191	1.0091	30.5497	#N/A	#N/A	62.3425	57.697	75
3817	295.659	3817	1.05098	3817	90.4407	3929	1.56002	3929	2		3817	295.659	1.05098	90.4407	#N/A	#N/A	50.7505	40.0402	50
2537	421.474	2537	1.01223	2537	39.9833	4313	1.66655	4313	3		2537	421.474	1.01223	39.9833	#N/A	#N/A	72.3469	42.7745	75
3561	220.539	3561	1.00809	3561	67.1244	3289	2.41777	3289	3		3561	220.539	1.00809	67.1244	#N/A	#N/A	37.856	62.0557	75
4121	311.899	4121	1.0491	4121	125.066	3545	1.60744	3545	2		4121	311.899	1.0491	125.066	#N/A	#N/A	53.5381	41.2574	50
3097	416.788	3097	1.02704	3097	47.6375	3033	2.15222	3033	1		3097	416.788	1.02704	47.6375	#N/A	#N/A	71.5425	55.2399	25
4249	500.134	4249	1.00164	4249	22.1402	4153	1.67657	4153	1		4249	500.134	1.00164	22.1402	#N/A	#N/A	85.849	43.0317	25
3225	232.93	3225	1.03362	3225	170.917	1081	1.94133	1081	1		3225	232.93	1.03362	170.917	#N/A	#N/A	39.9829	49.8271	25
2969	389.014	2969	1.05247	2969	49.8587	3129	1.53766	3129	2		2969	389.014	1.05247	49.8587	#N/A	#N/A	66.775	39.4663	50
1945	160.76	1945	1.01606	1945	47.7289	3641	1.86551	3641	1		1945	160.76	1.01606	47.7289	#N/A	#N/A	27.5948	47.8811	25
4185	377.194	4185	1.03168	4185	172.585	3385	1.81844	3385	2		4185	377.194	1.03168	172.585	#N/A	#N/A	64.7461	46.673	50
3673	106.34	3673	1.0417	3673	53.4673	2873	1.77307	2873	1		3673	106.34	1.0417	53.4673	#N/A	#N/A	18.2535	45.5085	25
3417	168.009	3417	1.01377	3417	44.4047	4281	2.1236	4281	1		3417	168.009	1.01377	44.4047	#N/A	#N/A	28.8391	54.5054	25
3929	49.0199	3929	1.01615	3929	64.3068	3257	2.05395	3257	3		3929	49.0199	1.01615	64.3068	#N/A	#N/A	8.41436	52.7177	75
4313	414.903	4313	1.00823	4313	14.7295	2745	2.11915	2745	2		4313	414.903	1.00823	14.7295	#N/A	#N/A	71.2189	54.3912	50
3289	333.073	3289	1.02116	3289	98.6971	3769	2.28339	3769	1		3289	333.073	1.02116	98.6971	#N/A	#N/A	57.1727	58.6066	25
3545	39.439	3545	1.05229	3545	190.722	3513	2.16277	3513	3		3545	39.439	1.05229	190.722	#N/A	#N/A	6.76978	55.5107	75
3033	241.495	3033	1.05075	3033	228.175	4217	3.30744	4217	2		3033	241.495	1.05075	228.175	#N/A	#N/A	41.4531	84.8904	50
4153	350.47	4153	1.04954	4153	252.856	3705	1.7651	3705	3		4153	350.47	1.04954	252.856	#N/A	#N/A	60.1589	45.3039	75
1081	434.851	1081	1.0279	1081	79.0163	2937	1.54974	2937	1		1081	434.851	1.0279	79.0163	#N/A	#N/A	74.643	39.7764	25
3129	309.684	3129	1.01096	3129	32.7813	1273	1.90278	1273	3		3129	309.684	1.01096	32.7813	#N/A	#N/A	53.1579	48.8377	75
3641	267.702	3641	1.06279	3641	180.26	3321	1.46124	3321	1		3641	267.702	1.06279	180.26	#N/A	#N/A	45.9516	37.5049	25
3385	303.375	3385	1.04327	3385	153.83	3833	2.15107	3833	2		3385	303.375	1.04327	153.83	#N/A	#N/A	52.0749	55.2104	50
2873	398.964	2873	1.07044	2873	227.965	2553	1.93455	2553	3		2873	398.964	1.07044	227.965	#N/A	#N/A	68.483	49.6531	75
4281	360.142	4281	1.05887	4281	94.5162	3577	2.01215	3577	3		4281	360.142	1.05887	94.5162	#N/A	#N/A	61.8191	51.6448	75
3257	184.204	3257	1.02565	3257	52.7149	2041	2.23357	2041	2		3257	184.204	1.02565	52.7149	#N/A	#N/A	31.619	57.3279	50
2745	217.123	2745	1.03095	2745	57.638	4101	2.00177	4101	2		2745	217.123	1.03095	57.638	#N/A	#N/A	37.2696	51.3784	50
3769	159.111	3769	1.03491	3769	90.0303	517	2.03121	517	2		3769	159.111	1.03491	90.0303	#N/A	#N/A	27.3117	52.134	50
3513	71.2442	3513	1.01609	3513	89.7053	3589	2.21847	3589	3		3513	71.2442	1.01609	89.7053	#N/A	#N/A	12.2292	56.9403	75
4217	92.9044	4217	1.04515	4217	58.4396	1797	1.34865	1797	1		4217	92.9044	1.04515	58.4396	#N/A	#N/A	15.9472	34.6151	25
3705	309.165	3705	1.01016	3705	25.5789	4229	2.02809	4229	2		3705	309.165	1.01016	25.5789	#N/A	#N/A	53.0688	52.054	50
2937	34.631	2937	1.03201	2937	219.869	2949	1.6858	2949	2		2937	34.631	1.03201	219.869	#N/A	#N/A	5.94448	43.2686	50
4345	0	4345	1.02688	4345	131.003	3973	2.05258	3973	4		4345	0	1.02688	131.003	#N/A	#N/A	0	52.6825	100
1273	297.491	1273	1.03698	1273	99.8896	4165	1.30659	4165	1		1273	297.491	1.03698	99.8896	#N/A	#N/A	51.0649	33.5356	25
3321	222.078	3321	1.06746	3321	179.537	1093	1.87259	1093	3		3321	222.078	1.06746	179.537	#N/A	#N/A	38.1201	48.0628	75
3833	233.539	3833	1.0286	3833	22.2676	1349	2.3135	1349	3		3833	233.539	1.0286	22.2676	#N/A	#N/A	40.0874	59.3794	75
2553	174.263	2553	1.03394	2553	50.5225	4293	1.59797	4293	2		2553	174.263	1.03394	50.5225	#N/A	#N/A	29.9126	41.0143	50
3577	176.042	3577	1.016	3577	44.1089	3269	1.44732	3269	1		3577	176.042	1.016	44.1089	#N/A	#N/A	30.218	37.1476	25
2041	263.762	2041	1.02077	2041	47.436	2501	1.86357	2501	2		2041	263.762	1.02077	47.436	#N/A	#N/A	45.2753	47.8313	50
4101	175.198	4101	1.02912	4101	113.782	3525	2.27214	3525	3		4101	175.198	1.02912	113.782	#N/A	#N/A	30.0731	58.3179	75
517	323.562	517	1.02541	517	58.3426	3013	1.77119	3013	1		517	323.562	1.02541	58.3426	#N/A	#N/A	55.5401	45.4602	25
3589	366.375	3589	1.00625	3589	44.7662	4133	1.47838	4133	2		3589	366.375	1.00625	44.7662	#N/A	#N/A	62.889	37.9448	50
1797	230.598	1797	1.02827	1797	71.6031	3109	2.15921	3109	2		1797	230.598	1.02827	71.6031	#N/A	#N/A	39.5826	55.4194	50
4229	81.3547	4229	1.03509	4229	73.8668	4261	1.67741	4261	1		4229	81.3547	1.03509	73.8668	#N/A	#N/A	13.9647	43.0532	25
2949	61.5695	2949	1.02009	2949	154.131	3237	1.66282	3237	2		2949	61.5695	1.02009	154.131	#N/A	#N/A	10.5685	42.6788	50
3973	163.025	3973	1.01902	3973	34.6441	3493	2.22771	3493	2		3973	163.025	1.01902	34.6441	#N/A	#N/A	27.9836	57.1775	50
4165	582.574	4165	1.03573	4165	358.645	4005	2.04263	4005	1		4165	582.574	1.03573	358.645	#N/A	#N/A	100	52.4272	25
1093	124.988	1093	1.02957	1093	62.1539	101	2.4096	101	2		1093	124.988	1.02957	62.1539	#N/A	#N/A	21.4544	61.846	50
1349	220.553	1349	1.01253	1349	57.6617	4197	1.7075	4197	1		1349	220.553	1.01253	57.6617	#N/A	#N/A	37.8584	43.8255	25
4293	312.096	4293	1.01913	4293	45.7931	3173	2.19791	3173	1		4293	312.096	1.01913	45.7931	#N/A	#N/A	53.5719	56.4126	25
3269	199.083	3269	1.04422	3269	199.109	3429	1.78166	3429	1		3269	199.083	1.04422	199.109	#N/A	#N/A	34.173	45.729	25
2501	460.513	2501	1.01204	2501	51.5074	3941	2.11459	3941	2		2501	460.513	1.01204	51.5074	#N/A	#N/A	79.048	54.2741	50
3525	119.341	3525	1.04504	3525	92.3542	4325	2.27265	4325	4		3525	119.341	1.04504	92.3542	#N/A	#N/A	20.4851	58.331	100
3013	420.557	3013	1.04708	3013	203.748	3301	2.39701	3301	2		3013	420.557	1.04708	203.748	#N/A	#N/A	72.1895	61.5228	50
4133	139.981	4133	1.04583	4133	58.7245	2789	1.55697	2789	1		4133	139.981	1.04583	58.7245	#N/A	#N/A	24.028	39.962	25
3109	59.5906	3109	1.04317	3109	106.522	3813	1.8258	3813	2		3109	59.5906	1.04317	106.522	#N/A	#N/A	10.2288	46.8619	50
4261	388.245	4261	1.04836	4261	297.885	1509	2.41367	1509	2		4261	388.245	1.04836	297.885	#N/A	#N/A	66.643	61.9504	50
3237	267.148	3237	1.05357	3237	220.558	4117	1.99506	4117	1		3237	267.148	1.05357	220.558	#N/A	#N/A	45.8565	51.2062	25
3493	0	3493	1.03678	3493	172.755	3093	1.83469	3093	1		3493	0	1.03678	172.755	#N/A	#N/A	0	47.0901	25
4005	289.451	4005	1.02862	4005	119.42	1301	1.81219	1301	2		4005	289.451	1.02862	119.42	#N/A	#N/A	49.6848	46.5126	50
101	287.105	101	1.00537	101	31.4703	2453	1.77846	2453	2		101	287.105	1.00537	31.4703	#N/A	#N/A	49.2822	45.6468	50
4197	194.772	4197	1.03029	4197	415.97	3477	1.96555	3477	3		4197	194.772	1.03029	415.97	#N/A	#N/A	33.433	50.4488	75
3173	323.397	3173	1.08203	3173	107.555	2965	1.80341	2965	1		3173	323.397	1.08203	107.555	#N/A	#N/A	55.5117	46.2872	25
3429	282.84	3429	1.03587	3429	141.321	4181	1.70878	4181	1		3429	282.84	1.03587	141.321	#N/A	#N/A	48.5501	43.8584	25
3941	337.468	3941	1.02571	3941	49.0445	3669	2.12117	3669	3		3941	337.468	1.02571	49.0445	#N/A	#N/A	57.9271	54.443	75
4325	195.572	4325	1.07482	4325	42.3165	1365	2.0672	1365	3		4325	195.572	1.07482	42.3165	#N/A	#N/A	33.5703	53.0578	75
3301	255.938	3301	1.00938	3301	48.1159	4309	1.62233	4309	2		3301	255.938	1.00938	48.1159	#N/A	#N/A	43.9323	41.6395	50
2789	349.26	2789	1.02868	2789	187.067	3285	2.02008	3285	1		2789	349.26	1.02868	187.067	#N/A	#N/A	59.9512	51.8484	25
3813	122.136	3813	1.01984	3813	53.3572	3797	2.15639	3797	4		3813	122.136	1.01984	53.3572	#N/A	#N/A	20.9649	55.347	100
1509	115.34	1509	1.01803	1509	50.3806	469	2.52505	469	2		1509	115.34	1.01803	50.3806	#N/A	#N/A	19.7983	64.8092	50
4117	286.003	4117	1.04186	4117	118.114	3541	2.75122	3541	3		4117	286.003	1.04186	118.114	#N/A	#N/A	49.093	70.6142	75
3093	393.579	3093	1.02445	3093	150.156	981	3.35567	981	4		3093	393.579	1.02445	150.156	#N/A	#N/A	67.5586	86.1283	100
1301	363.77	1301	1.01137	1301	36.7332	4053	1.91829	4053	2		1301	363.77	1.01137	36.7332	#N/A	#N/A	62.4419	49.2358	50
2453	450.442	2453	1.00705	2453	40.5291	4149	2.2532	4149	1		2453	450.442	1.00705	40.5291	#N/A	#N/A	77.3193	57.8317	25
3477	273.868	3477	1.01152	3477	45.0512	2101	2.03838	2101	2		3477	273.868	1.01152	45.0512	#N/A	#N/A	47.01	52.3181	50
2965	359.195	2965	1.0594	2965	270.035	3637	1.88567	3637	2		2965	359.195	1.0594	270.035	#N/A	#N/A	61.6565	48.3985	50
4181	472.304	4181	1.06715	4181	499.544	309	2.41709	309	3		4181	472.304	1.06715	499.544	#N/A	#N/A	81.0719	62.0382	75
3669	99.3885	3669	1.01487	3669	43.9248	2357	1.90199	2357	2		3669	99.3885	1.01487	43.9248	#N/A	#N/A	17.0602	48.8174	50
1365	209.813	1365	1.01496	1365	72.902	3893	1.98738	3893	2		1365	209.813	1.01496	72.902	#N/A	#N/A	36.0148	51.0091	50
4309	80.5253	4309	1.00949	4309	35.4659	4277	2.82688	4277	2		4309	80.5253	1.00949	35.4659	#N/A	#N/A	13.8223	72.5561	50
3285	220.37	3285	1.02408	3285	54.1279	2229	1.79393	2229	2		3285	220.37	1.02408	54.1279	#N/A	#N/A	37.827	46.0439	50
3797	67.4279	3797	1.02508	3797	46.2386	3253	2.04646	3253	2		3797	67.4279	1.02508	46.2386	#N/A	#N/A	11.5741	52.5255	50
469	198.247	469	1.0247	469	23.1308	1717	1.69975	1717	1		469	198.247	1.0247	23.1308	#N/A	#N/A	34.0295	43.6266	25
3541	70.3262	3541	1.02198	3541	24.5145	3509	1.44162	3509	1		3541	70.3262	1.02198	24.5145	#N/A	#N/A	12.0716	37.0013	25
981	95.5684	981	1.02841	981	77.8866	4213	3.89613	4213	4		981	95.5684	1.02841	77.8866	#N/A	#N/A	16.4045	100	100
4053	300.453	4053	1.02533	4053	73.8649	3189	1.96246	3189	2		4053	300.453	1.02533	73.8649	#N/A	#N/A	51.5734	50.3695	50
4149	290.34	4149	1.02909	4149	131.958	3445	1.43859	3445	2		4149	290.34	1.02909	131.958	#N/A	#N/A	49.8374	36.9236	50
2101	262.27	2101	1.04139	2101	102.483	3573	2.00786	3573	3		2101	262.27	1.04139	102.483	#N/A	#N/A	45.0192	51.5347	75
3637	242.652	3637	1.0297	3637	52.1961	4085	1.6858	4085	2		3637	242.652	1.0297	52.1961	#N/A	#N/A	41.6517	43.2686	50
309	194.198	309	1.0384	309	77.2282	4109	2.26572	4109	2		309	194.198	1.0384	77.2282	#N/A	#N/A	33.3345	58.1531	50
2357	246.397	2357	1.02026	2357	67.9216	3085	2.11148	3085	2		2357	246.397	1.02026	67.9216	#N/A	#N/A	42.2945	54.1943	50
3893	0	3893	1.03362	3893	146.357	2573	1.75049	2573	1		3893	0	1.03362	146.357	#N/A	#N/A	0	44.9289	25
4277	355.469	4277	1.01331	4277	44.6433	1549	2.17992	1549	1		4277	355.469	1.01331	44.6433	#N/A	#N/A	61.017	55.9509	25
2229	221.575	2229	1.04391	2229	90.6895	3341	2.16237	3341	3		2229	221.575	1.04391	90.6895	#N/A	#N/A	38.0338	55.5005	75
3253	169.246	3253	1.02179	3253	60.9567	2829	1.86425	2829	3		3253	169.246	1.02179	60.9567	#N/A	#N/A	29.0514	47.8488	75
1717	233.264	1717	1.03102	1717	82.3737	1805	2.08949	1805	3		1717	233.264	1.03102	82.3737	#N/A	#N/A	40.0402	53.6299	75
3509	181.756	3509	1.02278	3509	305.135	3853	2.27597	3853	1		3509	181.756	1.02278	305.135	#N/A	#N/A	31.1988	58.4162	25
4213	125.918	4213	1.01929	4213	92.3921	4237	1.63572	4237	2		4213	125.918	1.01929	92.3921	#N/A	#N/A	21.6141	41.9832	50
3189	398.213	3189	1.03392	3189	62.0071	3725	1.88606	3725	2		3189	398.213	1.03392	62.0071	#N/A	#N/A	68.3541	48.4085	50
3445	124.158	3445	1.03177	3445	121.843	2957	1.81917	2957	1		3445	124.158	1.03177	121.843	#N/A	#N/A	21.312	46.6917	25
4341	24.5583	4341	1.05451	4341	96.9199	1933	2.09488	1933	3		4341	24.5583	1.05451	96.9199	#N/A	#N/A	4.21548	53.7682	75
3573	245.06	3573	1.0244	3573	35.2868	3981	2.27265	3981	4		3573	245.06	1.0244	35.2868	#N/A	#N/A	42.065	58.331	100
4085	73.7392	4085	1.0373	4085	223.956	4173	1.30928	4173	1		4085	73.7392	1.0373	223.956	#N/A	#N/A	12.6575	33.6046	25
4109	227.276	4109	1.04777	4109	89.5782	333	1.79529	333	2		4109	227.276	1.04777	89.5782	#N/A	#N/A	39.0124	46.0788	50
3085	0	3085	1.03041	3085	216.179	4301	1.59133	4301	1		3085	0	1.03041	216.179	#N/A	#N/A	0	40.8439	25
2573	472.633	2573	1.05001	2573	204.558	3277	1.66046	3277	2		2573	472.633	1.05001	204.558	#N/A	#N/A	81.1284	42.6182	50
1549	264.197	1549	1.03688	1549	105.408	3533	1.97043	3533	3		1549	264.197	1.03688	105.408	#N/A	#N/A	45.3499	50.574	75
3341	390.111	3341	1.01672	3341	50.7183	4045	1.72091	4045	1		3341	390.111	1.01672	50.7183	#N/A	#N/A	66.9633	44.1697	25
2829	86.2373	2829	1.02689	2829	32.5388	4141	1.29226	4141	1		2829	86.2373	1.02689	32.5388	#N/A	#N/A	14.8028	33.1678	25
1805	214.405	1805	1.01724	1805	21.8661	301	1.62233	301	2		1805	214.405	1.01724	21.8661	#N/A	#N/A	36.803	41.6395	50
3853	250.427	3853	1.0333	3853	178.751	2349	1.61655	2349	1		3853	250.427	1.0333	178.751	#N/A	#N/A	42.9863	41.4912	25
4237	127.629	4237	1.04097	4237	260.434	4269	1.52687	4269	2		4237	127.629	1.04097	260.434	#N/A	#N/A	21.9078	39.1894	50
3725	151.904	3725	1.03009	3725	57.8491	3757	1.93286	3757	2		3725	151.904	1.03009	57.8491	#N/A	#N/A	26.0746	49.6097	50
2957	296.792	2957	1.05771	2957	201.262	1133	2.54472	1133	2		2957	296.792	1.05771	201.262	#N/A	#N/A	50.9449	65.314	50
1933	264.626	1933	1.02998	1933	30.3735	3181	2.02033	3181	2		1933	264.626	1.02998	30.3735	#N/A	#N/A	45.4236	51.8548	50
3981	188.388	3981	1.03144	3981	76.0647	2669	1.81018	2669	1		3981	188.388	1.03144	76.0647	#N/A	#N/A	32.3372	46.461	25
4173	543.401	4173	1.01563	4173	49.4589	3693	2.49668	3693	2		4173	543.401	1.01563	49.4589	#N/A	#N/A	93.2759	64.081	50
333	293.01	333	1.01564	333	42.6091	3437	2.2446	3437	2		333	293.01	1.01564	42.6091	#N/A	#N/A	50.2958	57.611	50
3917	0	3917	1.02616	3917	107.846	2925	2.1279	2925	2		3917	0	1.02616	107.846	#N/A	#N/A	0	54.6157	50
4301	205.128	4301	1.0404	4301	111.061	4333	1.84409	4333	2		4301	205.128	1.0404	111.061	#N/A	#N/A	35.2106	47.3313	50
3277	249.319	3277	1.03857	3277	110.497	2285	3.46037	2285	3		3277	249.319	1.03857	110.497	#N/A	#N/A	42.7961	88.8156	75
3533	144.398	3533	1.0348	3533	68.7086	3821	2.05258	3821	4		3533	144.398	1.0348	68.7086	#N/A	#N/A	24.7862	52.6825	100
4045	187.759	4045	1.06012	4045	159.312	3565	1.59016	3565	2		4045	187.759	1.06012	159.312	#N/A	#N/A	32.2292	40.8138	50
4141	243.932	4141	1.05884	4141	110.42	4125	2.03333	4125	2		4141	243.932	1.05884	110.42	#N/A	#N/A	41.8714	52.1885	50
301	81.5233	301	1.01236	301	38.2798	3869	2.08734	3869	1		301	81.5233	1.01236	38.2798	#N/A	#N/A	13.9936	53.5747	25
2349	444.447	2349	1.06778	2349	386.294	4253	1.46899	4253	3		2349	444.447	1.06778	386.294	#N/A	#N/A	76.2902	37.7038	75
4269	375.646	4269	1.01156	4269	11.6268	3741	1.58504	3741	1		4269	375.646	1.01156	11.6268	#N/A	#N/A	64.4804	40.6824	25
3757	286.575	3757	1.00849	3757	29.579	2973	2.01168	2973	1		3757	286.575	1.00849	29.579	#N/A	#N/A	49.1912	51.6328	25
4205	57.0818	4205	1.0299	4205	115.832	1949	1.98725	1949	3		4205	57.0818	1.0299	115.832	#N/A	#N/A	9.79821	51.0057	75
1133	128.088	1133	1.00497	1133	30.9403	3165	1.87356	3165	3		1133	128.088	1.00497	30.9403	#N/A	#N/A	21.9866	48.0877	75
3181	361.648	3181	1.03844	3181	42.4113	2397	1.62961	2397	1		3181	361.648	1.03844	42.4113	#N/A	#N/A	62.0776	41.8264	25
2669	12.5187	2669	1.03707	2669	250.71	3421	2.35135	3421	1		2669	12.5187	1.03707	250.71	#N/A	#N/A	2.14886	60.3509	25
3693	163.222	3693	1.04262	3693	87.0603	3933	2.15639	3933	4		3693	163.222	1.04262	87.0603	#N/A	#N/A	28.0174	55.347	100
3437	367.85	3437	1.05041	3437	76.0606	221	1.67445	221	2		3437	367.85	1.05041	76.0606	#N/A	#N/A	63.1422	42.9773	50
2925	438.743	2925	1.042	2925	118.631	4317	1.88901	4317	3		2925	438.743	1.042	118.631	#N/A	#N/A	75.3111	48.4843	75
4333	35.5648	4333	1.04846	4333	156.989	3805	2.12117	3805	3		4333	35.5648	1.04846	156.989	#N/A	#N/A	6.10477	54.443	75
2285	105.456	2285	1.04937	2285	68.49	989	2.71347	989	2		2285	105.456	1.04937	68.49	#N/A	#N/A	18.1017	69.6453	50
3821	154.003	3821	1.03456	3821	52.2321	4157	1.4421	4157	1		3821	154.003	1.03456	52.2321	#N/A	#N/A	26.4349	37.0137	25
3565	207.064	3565	1.03921	3565	141.643	3389	3.58577	3389	1		3565	207.064	1.03921	141.643	#N/A	#N/A	35.543	92.0341	25
4125	179.642	4125	1.01152	4125	48.7905	2877	2.1279	2877	2		4125	179.642	1.01152	48.7905	#N/A	#N/A	30.8359	54.6157	50
3869	208.907	3869	1.01805	3869	67.5493	4285	1.67384	4285	2		3869	208.907	1.01805	67.5493	#N/A	#N/A	35.8593	42.9616	50
4253	443.912	4253	1.00047	4253	10.1615	2749	1.7229	2749	1		4253	443.912	1.00047	10.1615	#N/A	#N/A	76.1984	44.2208	25
3741	173.885	3741	1.02983	3741	196.218	1725	1.39419	1725	2		3741	173.885	1.02983	196.218	#N/A	#N/A	29.8477	35.784	50
2973	402.051	2973	1.03243	2973	139.945	3517	2.13263	3517	2		2973	402.051	1.03243	139.945	#N/A	#N/A	69.0129	54.7371	50
1949	219.57	1949	1.02576	1949	81.904	3005	1.97543	3005	2		1949	219.57	1.02576	81.904	#N/A	#N/A	37.6896	50.7024	50
3165	232.986	3165	1.02306	3165	52.7452	4221	2.70648	4221	3		3165	232.986	1.02306	52.7452	#N/A	#N/A	39.9925	69.4659	75
2397	488.711	2397	1.03646	2397	282.977	2685	2.05027	2685	2		2397	488.711	1.03646	282.977	#N/A	#N/A	83.8882	52.6232	50
3421	182.239	3421	1.05143	3421	188.087	381	1.68656	381	3		3421	182.239	1.05143	188.087	#N/A	#N/A	31.2817	43.2881	75
3933	60.4593	3933	1.0245	3933	60.6975	253	1.73473	253	3		3933	60.4593	1.0245	60.6975	#N/A	#N/A	10.378	44.5244	75
221	459.564	221	1.04139	221	113.691	2301	1.66385	2301	1		221	459.564	1.04139	113.691	#N/A	#N/A	78.8851	42.7052	25
4317	411.846	4317	1.00465	4317	15.1104	1789	2.32687	1789	3		4317	411.846	1.00465	15.1104	#N/A	#N/A	70.6942	59.7226	75
3805	97.9771	3805	1.0109	3805	25.2083	1533	2.04341	1533	1		3805	97.9771	1.0109	25.2083	#N/A	#N/A	16.818	52.4472	25
989	22.2841	989	1.0203	989	155.811	4093	1.44181	4093	1		989	22.2841	1.0203	155.811	#N/A	#N/A	3.82511	37.0062	25
4157	474.608	4157	1.02694	4157	557.569	4099	1.97886	4099	1		4157	474.608	1.02694	557.569	#N/A	#N/A	81.4674	50.7904	25
3389	336.064	3389	1.00644	3389	54.2831	2563	1.77601	2563	1		3389	336.064	1.00644	54.2831	#N/A	#N/A	57.6861	45.584	25
2877	445.848	2877	1.02366	2877	68.765	3587	1.98272	3587	1		2877	445.848	1.02366	68.765	#N/A	#N/A	76.5307	50.8895	25
4285	336.653	4285	1.01842	4285	16.3055	2819	1.46835	2819	2		4285	336.653	1.01842	16.3055	#N/A	#N/A	57.7872	37.6874	50
2749	332.317	2749	1.03128	2749	500.616	4227	2.7533	4227	2		2749	332.317	1.03128	500.616	#N/A	#N/A	57.0429	70.6676	50
1725	113.728	1725	1.01485	1725	118.512	2179	1.4577	2179	1		1725	113.728	1.01485	118.512	#N/A	#N/A	19.5216	37.414	25
3517	92.2885	3517	1.02251	3517	49.7954	3203	1.97289	3203	3		3517	92.2885	1.02251	49.7954	#N/A	#N/A	15.8415	50.6372	75
3005	117.569	3005	1.00762	3005	49.6542	2691	1.67445	2691	2		3005	117.569	1.00762	49.6542	#N/A	#N/A	20.181	42.9773	50
4221	67.0862	4221	1.02662	4221	57.0751	2435	1.47045	2435	2		4221	67.0862	1.02662	57.0751	#N/A	#N/A	11.5155	37.7413	50
2685	47.0604	2685	1.04291	2685	197.737	4163	1.4043	4163	1		2685	47.0604	1.04291	197.737	#N/A	#N/A	8.07801	36.0435	25
381	47.7229	381	1.02725	381	83.6407	3139	1.9274	3139	1		381	47.7229	1.02725	83.6407	#N/A	#N/A	8.19173	49.4696	25
253	65.9885	253	1.02401	253	36.5081	3651	2.21847	3651	3		253	65.9885	1.02401	36.5081	#N/A	#N/A	11.3271	56.9403	75
4349	50.1952	4349	1.06998	4349	81.5096	1347	1.96218	1347	3		4349	50.1952	1.06998	81.5096	#N/A	#N/A	8.61611	50.3623	75
2301	478.92	2301	1.04126	2301	202.445	3395	1.78303	3395	2		2301	478.92	1.04126	202.445	#N/A	#N/A	82.2076	45.7641	50
1789	192.2	1789	1.02031	1789	39.3029	4291	1.9133	4291	1		1789	192.2	1.02031	39.3029	#N/A	#N/A	32.9915	49.1077	25
1533	348.767	1533	1.0431	1533	60.6419	3267	1.83053	3267	1		1533	348.767	1.0431	60.6419	#N/A	#N/A	59.8666	46.9833	25
4093	93.4347	4093	1.04844	4093	194.922	2755	1.85234	2755	2		4093	93.4347	1.04844	194.922	#N/A	#N/A	16.0383	47.5431	50
4099	150.847	4099	1.03325	4099	122.094	2499	2.28202	2499	2		4099	150.847	1.03325	122.094	#N/A	#N/A	25.8932	58.5715	50
2563	411.571	2563	1.04126	2563	156.664	3523	2.41367	3523	2		2563	411.571	1.04126	156.664	#N/A	#N/A	70.647	61.9504	50
3587	344.508	3587	1.04082	3587	116.978	3011	2.24353	3011	3		3587	344.508	1.04082	116.978	#N/A	#N/A	59.1355	57.5836	75
2819	329.289	2819	1.02414	2819	139.144	4035	1.72492	4035	2		2819	329.289	1.02414	139.144	#N/A	#N/A	56.5231	44.2727	50
4227	89.3599	4227	1.02732	4227	85.6712	4131	1.97852	4131	4		4227	89.3599	1.02732	85.6712	#N/A	#N/A	15.3388	50.7817	100
2179	557.161	2179	1.05589	2179	166.45	2339	1.85422	2339	2		2179	557.161	1.05589	166.45	#N/A	#N/A	95.6378	47.5913	50
3203	163.771	3203	1.03332	3203	63.383	1315	1.85678	1315	2		3203	163.771	1.03332	63.383	#N/A	#N/A	28.1116	47.657	50
2691	466.604	2691	1.01545	2691	41.262	3363	1.34448	3363	2		2691	466.604	1.01545	41.262	#N/A	#N/A	80.0935	34.5081	50
2435	25.5042	2435	1.02018	2435	140.718	3875	1.90199	3875	2		2435	25.5042	1.02018	140.718	#N/A	#N/A	4.37785	48.8174	50
4163	548.829	4163	1.05125	4163	872.778	4259	1.75587	4259	2		4163	548.829	1.05125	872.778	#N/A	#N/A	94.2076	45.067	50
3139	161.591	3139	1.03218	3139	129.966	2211	2.30327	2211	3		3139	161.591	1.03218	129.966	#N/A	#N/A	27.7374	59.1169	75
3651	369.526	3651	1.02982	3651	65.694	1187	1.87356	1187	3		3651	369.526	1.02982	65.694	#N/A	#N/A	63.4299	48.0877	75
1347	265.89	1347	1.0415	1347	120.519	3747	2.10403	3747	3		1347	265.89	1.0415	120.519	#N/A	#N/A	45.6406	54.0031	75
3395	98.7136	3395	1.02175	3395	48.7567	2467	1.73242	2467	3		3395	98.7136	1.02175	48.7567	#N/A	#N/A	16.9444	44.4651	75
4291	318.239	4291	1.0483	4291	100.468	4195	1.39425	4195	1		4291	318.239	1.0483	100.468	#N/A	#N/A	54.6264	35.7855	25
3267	200.822	3267	1.04803	3267	114.189	2147	1.92165	2147	1		3267	200.822	1.04803	114.189	#N/A	#N/A	34.4715	49.322	25
2755	387.359	2755	1.02628	2755	24.3972	3683	1.96578	3683	3		2755	387.359	1.02628	24.3972	#N/A	#N/A	66.491	50.4547	75
2499	27.3173	2499	1.0543	2499	108.094	3427	1.96218	3427	3		2499	27.3173	1.0543	108.094	#N/A	#N/A	4.68907	50.3623	75
3523	110.508	3523	1.01676	3523	46.6544	3939	2.24494	3939	4		3523	110.508	1.01676	46.6544	#N/A	#N/A	18.9689	57.6197	100
3011	139.067	3011	1.04242	3011	59.8343	4323	1.7032	4323	1		3011	139.067	1.04242	59.8343	#N/A	#N/A	23.8711	43.7152	25
4035	110.77	4035	1.0316	4035	246.716	2531	1.96524	2531	3		4035	110.77	1.0316	246.716	#N/A	#N/A	19.0139	50.4408	75
4131	139.113	4131	1.01174	4131	30.1777	4115	2.18705	4115	2		4131	139.113	1.01174	30.1777	#N/A	#N/A	23.879	56.1339	50
2339	28.3073	2339	1.01069	2339	131.156	3091	2.05027	3091	2		2339	28.3073	1.01069	131.156	#N/A	#N/A	4.85901	52.6232	50
1315	356.833	1315	1.01461	1315	62.2703	1555	2.05258	1555	4		1315	356.833	1.01461	62.2703	#N/A	#N/A	61.2511	52.6825	100
3363	179.891	3363	1.0418	3363	191.522	3603	1.82194	3603	1		3363	179.891	1.0418	191.522	#N/A	#N/A	30.8787	46.7628	25
3875	248.375	3875	1.01645	3875	40.9945	3347	1.62073	3347	1		3875	248.375	1.01645	40.9945	#N/A	#N/A	42.6341	41.5985	25
4259	400.708	4259	1.00471	4259	9.78672	4243	1.28604	4243	2		4259	400.708	1.00471	9.78672	#N/A	#N/A	68.7823	33.0081	50
2211	214.727	2211	1.01674	2211	25.414	2195	2.0672	2195	3		2211	214.727	1.01674	25.414	#N/A	#N/A	36.8583	53.0578	75
1187	232.097	1187	1.01226	1187	38.3999	2451	1.44834	2451	2		1187	232.097	1.01226	38.3999	#N/A	#N/A	39.8399	37.1738	50
3747	217.909	3747	1.01234	3747	21.2481	3987	2.28575	3987	1		3747	217.909	1.01234	21.2481	#N/A	#N/A	37.4045	58.6672	25
2467	140.301	2467	1.00747	2467	32.7876	4179	2.1648	4179	1		2467	140.301	1.00747	32.7876	#N/A	#N/A	24.0829	55.5628	25
4195	249.685	4195	1.03902	4195	269.165	2131	1.73332	2131	3		4195	249.685	1.03902	269.165	#N/A	#N/A	42.8589	44.4882	75
2147	67.5984	2147	1.02605	2147	209.679	1107	2.46202	1107	1		2147	67.5984	1.02605	209.679	#N/A	#N/A	11.6034	63.1914	25
3683	138.378	3683	1.06267	3683	109.96	3923	2.31602	3923	3		3683	138.378	1.06267	109.96	#N/A	#N/A	23.7529	59.4441	75
3427	274.515	3427	1.03046	3427	37.0136	4307	1.65296	4307	1		3427	274.515	1.03046	37.0136	#N/A	#N/A	47.1211	42.4257	25
3939	93.1491	3939	1.05206	3939	27.9597	3283	1.86236	3283	2		3939	93.1491	1.05206	27.9597	#N/A	#N/A	15.9892	47.8003	50
4323	516.329	4323	1.10734	4323	270.251	3795	1.29675	3795	1		4323	516.329	1.10734	270.251	#N/A	#N/A	88.6289	33.283	25
2531	105.525	2531	1.03788	2531	63.0184	3539	1.9806	3539	2		2531	105.525	1.03788	63.0184	#N/A	#N/A	18.1136	50.8351	50
4115	277.219	4115	1.03617	4115	24.785	3027	2.0589	3027	2		4115	277.219	1.03617	24.785	#N/A	#N/A	47.5852	52.8447	50
3091	26.4016	3091	1.03407	3091	182.284	4147	2.40149	4147	2		3091	26.4016	1.03407	182.284	#N/A	#N/A	4.53189	61.6378	50
1555	160.219	1555	1.0083	1555	29.7029	3123	2.15679	3123	3		1555	160.219	1.0083	29.7029	#N/A	#N/A	27.5019	55.3572	75
3603	55.8506	3603	1.02249	3603	195.783	563	2.19871	563	3		3603	55.8506	1.02249	195.783	#N/A	#N/A	9.58687	56.4332	75
3347	302.656	3347	1.0376	3347	322.008	1331	1.84409	1331	2		3347	302.656	1.0376	322.008	#N/A	#N/A	51.9515	47.3313	50
4243	529.224	4243	1.0303	4243	49.0837	3379	1.89982	3379	2		4243	529.224	1.0303	49.0837	#N/A	#N/A	90.8424	48.7617	50
2195	207.953	2195	1.00244	2195	17.254	3891	2.0427	3891	2		2195	207.953	1.00244	17.254	#N/A	#N/A	35.6956	52.4289	50
2451	427.673	2451	1.02007	2451	208.489	4275	1.90322	4275	3		2451	427.673	1.02007	208.489	#N/A	#N/A	73.4109	48.849	75
3987	186.127	3987	1.01788	3987	80.4262	3251	2.35935	3251	1		3987	186.127	1.01788	80.4262	#N/A	#N/A	31.9491	60.5562	25
4179	507.263	4179	1.07049	4179	95.333	3763	1.82978	3763	1		4179	507.263	1.07049	95.333	#N/A	#N/A	87.0727	46.964	25
2131	185.291	2131	1.02737	2131	37.0094	435	1.48597	435	2		2131	185.291	1.02737	37.0094	#N/A	#N/A	31.8056	38.1396	50
1107	208.718	1107	1.01881	1107	66.3765	2483	1.94017	2483	1		1107	208.718	1.01881	66.3765	#N/A	#N/A	35.8269	49.7974	25
3923	196.041	3923	1.01031	3923	66.28	3507	1.99933	3507	2		3923	196.041	1.01031	66.28	#N/A	#N/A	33.6508	51.3158	50
4307	155.261	4307	1.0301	4307	188.095	4211	3.12603	4211	2		4307	155.261	1.0301	188.095	#N/A	#N/A	26.6509	80.2342	50
3283	286.362	3283	1.05054	3283	86.2402	3187	1.91508	3187	1		3283	286.362	1.05054	86.2402	#N/A	#N/A	49.1546	49.1534	25
3795	123.422	3795	1.01557	3795	221.376	2675	1.62828	2675	1		3795	123.422	1.01557	221.376	#N/A	#N/A	21.1856	41.7922	25
3539	383.602	3539	1.01709	3539	27.826	3699	2.41709	3699	3		3539	383.602	1.01709	27.826	#N/A	#N/A	65.8461	62.0382	75
3027	209.886	3027	1.04706	3027	66.4502	371	2.17262	371	2		3027	209.886	1.04706	66.4502	#N/A	#N/A	36.0274	55.7635	50
4147	276.86	4147	1.04859	4147	54.0482	1907	3.45536	1907	2		4147	276.86	1.04859	54.0482	#N/A	#N/A	47.5236	88.687	50
3123	96.9653	3123	1.02996	3123	47.3091	4339	1.33994	4339	2		3123	96.9653	1.02996	47.3091	#N/A	#N/A	16.6443	34.3916	50
563	227.547	563	1.01621	563	49.2505	3315	2.05886	3315	3		563	227.547	1.01621	49.2505	#N/A	#N/A	39.0589	52.8437	75
1331	48.4014	1331	1.04437	1331	70.6626	2803	1.55844	2803	1		1331	48.4014	1.04437	70.6626	#N/A	#N/A	8.3082	39.9997	25
3379	267.616	3379	1.03485	3379	43.8408	2547	1.93455	2547	3		3379	267.616	1.03485	43.8408	#N/A	#N/A	45.9368	49.6531	75
3891	360.218	3891	1.00416	3891	36.1835	3571	2.12025	3571	2		3891	360.218	1.00416	36.1835	#N/A	#N/A	61.8321	54.4194	50
4275	358.115	4275	1.03187	4275	103.947	4083	1.56002	4083	2		4275	358.115	1.03187	103.947	#N/A	#N/A	61.4712	40.0402	50
3251	415.307	3251	1.00629	3251	36.0965	3083	1.53766	3083	2		3251	415.307	1.00629	36.0965	#N/A	#N/A	71.2883	39.4663	50
3763	331.353	3763	1.02253	3763	168.058	2571	3.17003	2571	2		3763	331.353	1.02253	168.058	#N/A	#N/A	56.8774	81.3636	50
435	239.051	435	1.01287	435	37.8042	1547	2.44294	1547	4		435	239.051	1.01287	37.8042	#N/A	#N/A	41.0336	62.7017	100
2483	0	2483	1.02989	2483	225.123	2699	1.68113	2699	1		2483	0	1.02989	225.123	#N/A	#N/A	0	43.1487	25
3507	48.3902	3507	1.03418	3507	121.447	3979	1.82808	3979	3		3507	48.3902	1.03418	121.447	#N/A	#N/A	8.30628	46.9204	75
4211	118.381	4211	1.01491	4211	55.5352	4171	1.28682	4171	1		4211	118.381	1.01491	55.5352	#N/A	#N/A	20.3203	33.0282	25
3187	380.042	3187	1.04231	3187	225	1099	1.54357	1099	1		3187	380.042	1.04231	225	#N/A	#N/A	65.235	39.618	25
2675	367.126	2675	1.05074	2675	468.911	3659	1.59708	3659	1		2675	367.126	1.05074	468.911	#N/A	#N/A	63.0179	40.9914	25
3699	193.614	3699	1.01054	3699	23.3384	2891	1.54671	2891	1		3699	193.614	1.01054	23.3384	#N/A	#N/A	33.2342	39.6986	25
371	307.665	371	1.00163	371	39.9957	3915	1.48057	3915	1		371	307.665	1.00163	39.9957	#N/A	#N/A	52.8113	38.001	25
1907	127.938	1907	1.02301	1907	83.1277	4299	2.33972	4299	3		1907	127.938	1.02301	83.1277	#N/A	#N/A	21.9608	60.0524	75
4339	564.824	4339	1.03289	4339	157.615	1227	1.73062	1227	2		4339	564.824	1.03289	157.615	#N/A	#N/A	96.9532	44.4189	50
3315	249.385	3315	1.02076	3315	39.3794	2763	1.5559	2763	1		3315	249.385	1.02076	39.3794	#N/A	#N/A	42.8074	39.9345	25
2803	507.98	2803	1.06508	2803	1189.03	3531	2.71347	3531	2		2803	507.98	1.06508	1189.03	#N/A	#N/A	87.1958	69.6453	50
2547	168.738	2547	1.02111	2547	28.9458	4043	1.77698	4043	2		2547	168.738	1.02111	28.9458	#N/A	#N/A	28.9642	45.6088	50
3571	222.677	3571	1.02566	3571	127.215	4139	1.91978	4139	1		3571	222.677	1.02566	127.215	#N/A	#N/A	38.223	49.274	25
4083	50.3806	4083	1.02085	4083	78.2461	3627	1.44232	3627	1		4083	50.3806	1.02085	78.2461	#N/A	#N/A	8.64793	37.0193	25
3083	314.082	3083	1.00261	3083	19.7673	3371	2.22771	3371	2		3083	314.082	1.00261	19.7673	#N/A	#N/A	53.9128	57.1775	50
2571	110.014	2571	1.03196	2571	72.4683	3883	2.07056	3883	2		2571	110.014	1.03196	72.4683	#N/A	#N/A	18.8841	53.144	50
1547	114.245	1547	1.02252	1547	43.4759	4267	1.93096	4267	2		1547	114.245	1.02252	43.4759	#N/A	#N/A	19.6104	49.561	50
2699	49.125	2699	1.02065	2699	192.214	2219	1.84975	2219	2		2699	49.125	1.02065	192.214	#N/A	#N/A	8.43241	47.4766	50
3979	179.288	3979	1.0385	3979	57.6827	2731	2.06079	2731	2		3979	179.288	1.0385	57.6827	#N/A	#N/A	30.7751	52.8933	50
4171	560.885	4171	1.01834	4171	82.6416	3755	1.76035	3755	2		4171	560.885	1.01834	82.6416	#N/A	#N/A	96.277	45.182	50
1099	436.716	1099	1.0732	1099	86.2149	4203	1.43813	4203	1		1099	436.716	1.0732	86.2149	#N/A	#N/A	74.9632	36.9118	25
3659	88.9816	3659	1.02946	3659	215.152	3179	1.68902	3179	1		3659	88.9816	1.02946	215.152	#N/A	#N/A	15.2739	43.3512	25
2891	286.027	2891	1.0352	2891	426.372	3435	1.47214	3435	1		2891	286.027	1.0352	426.372	#N/A	#N/A	49.0971	37.7847	25
3915	107.559	3915	1.03276	3915	188.166	3947	2.27786	3947	3		3915	107.559	1.03276	188.166	#N/A	#N/A	18.4627	58.4647	75
4299	253.779	4299	1.01532	4299	17.0191	235	1.95889	235	1		4299	253.779	1.01532	17.0191	#N/A	#N/A	43.5617	50.2778	25
1227	45.9017	1227	1.01449	1227	110.368	4331	2.3584	4331	2		1227	45.9017	1.01449	110.368	#N/A	#N/A	7.87912	60.5319	50
2763	487.329	2763	1.04847	2763	764.569	1259	1.83219	1259	2		2763	487.329	1.04847	764.569	#N/A	#N/A	83.651	47.0259	50
3531	22.8823	3531	1.03406	3531	118.275	3819	2.27656	3819	2		3531	22.8823	1.03406	118.275	#N/A	#N/A	3.92779	58.4313	50
4043	169.882	4043	1.03688	4043	40.1383	2539	1.6012	2539	2		4043	169.882	1.03688	40.1383	#N/A	#N/A	29.1606	41.0972	50
4139	221.34	4139	1.04931	4139	348.814	1515	1.76035	1515	2		4139	221.34	1.04931	348.814	#N/A	#N/A	37.9935	45.182	50
3627	160.549	3627	1.02821	3627	256.621	2331	3.45536	2331	2		3627	160.549	1.02821	256.621	#N/A	#N/A	27.5586	88.687	50
3371	16.4133	3371	1.02087	3371	143.335	4251	1.48021	4251	2		3371	16.4133	1.02087	143.335	#N/A	#N/A	2.81738	37.9918	50
3883	323.149	3883	1.02556	3883	76.8917	1691	1.58734	1691	2		3883	323.149	1.02556	76.8917	#N/A	#N/A	55.4692	40.7415	50
4267	396.619	4267	1.01733	4267	32.6505	3739	1.38108	3739	1		4267	396.619	1.01733	32.6505	#N/A	#N/A	68.0804	35.4475	25
2219	215.354	2219	1.01963	2219	63.3772	923	1.60933	923	1		2219	215.354	1.01963	63.3772	#N/A	#N/A	36.9659	41.3059	25
2731	186.267	2731	1.02445	2731	74.5701	1947	1.73332	1947	3		2731	186.267	1.02445	74.5701	#N/A	#N/A	31.9731	44.4882	75
3755	262.903	3755	1.00692	3755	22.7921	4187	1.51073	4187	1		3755	262.903	1.00692	22.7921	#N/A	#N/A	45.1278	38.7751	25
4203	104.275	4203	1.01839	4203	156.499	1115	1.46835	1115	2		4203	104.275	1.01839	156.499	#N/A	#N/A	17.899	37.6874	50
3179	104.59	3179	1.02863	3179	137.172	2395	2.30327	2395	3		3179	104.59	1.02863	137.172	#N/A	#N/A	17.9531	59.1169	75
3435	339.682	3435	1.0441	3435	83.4896	3419	2.24795	3419	3		3435	339.682	1.0441	83.4896	#N/A	#N/A	58.3071	57.697	75
3947	123.256	3947	1.0341	3947	64.9076	4315	1.66436	4315	3		3947	123.256	1.0341	64.9076	#N/A	#N/A	21.1571	42.7183	75
235	94.9135	235	1.01833	235	100.318	3291	2.24795	3291	3		235	94.9135	1.01833	100.318	#N/A	#N/A	16.2921	57.697	75
4331	212.674	4331	1.01519	4331	49.7214	475	2.39317	475	2		4331	212.674	1.01519	49.7214	#N/A	#N/A	36.5059	61.4243	50
1259	417.417	1259	1.00398	1259	30.1469	1499	2.19094	1499	2		1259	417.417	1.00398	30.1469	#N/A	#N/A	71.6505	56.2337	50
3819	305.196	3819	1.00519	3819	21.1472	3035	1.94042	3035	1		3819	305.196	1.00519	21.1472	#N/A	#N/A	52.3875	49.8038	25
2539	479.696	2539	1.09864	2539	230.8	4155	1.82266	4155	1		2539	479.696	1.09864	230.8	#N/A	#N/A	82.3408	46.7813	25
1515	265.804	1515	1.04506	1515	44.0431	3131	2.24353	3131	3		1515	265.804	1.04506	44.0431	#N/A	#N/A	45.6258	57.5836	75
2331	122.404	2331	1.04686	2331	111.047	3387	1.8466	3387	2		2331	122.404	1.04686	111.047	#N/A	#N/A	21.0109	47.3957	50
4251	514.95	4251	1.0137	4251	33.825	4283	1.76435	4283	2		4251	514.95	1.0137	33.825	#N/A	#N/A	88.3922	45.2847	50
1691	146.536	1691	1.04146	1691	126.257	3259	2.72224	3259	1		1691	146.536	1.04146	126.257	#N/A	#N/A	25.1532	69.8704	25
3739	140.767	3739	1.03666	3739	218.097	2747	1.54754	2747	1		3739	140.767	1.03666	218.097	#N/A	#N/A	24.1629	39.7199	25
923	459.96	923	1.05705	923	80.7323	3771	2.05395	3771	3		923	459.96	1.05705	80.7323	#N/A	#N/A	78.9531	52.7177	75
1947	184.022	1947	1.02645	1947	44.7387	3515	2.13263	3515	2		1947	184.022	1.02645	44.7387	#N/A	#N/A	31.5877	54.7371	50
4187	350.608	4187	1.06422	4187	385.736	3003	1.54999	3003	2		4187	350.608	1.06422	385.736	#N/A	#N/A	60.1826	39.7828	50
1115	344.237	1115	1.02587	1115	165.465	4219	3.07274	4219	4		1115	344.237	1.02587	165.465	#N/A	#N/A	59.089	78.8665	100
2395	210.809	2395	1.0332	2395	54.6744	2171	3.07274	2171	4		2395	210.809	1.0332	54.6744	#N/A	#N/A	36.1858	78.8665	100
3419	172.819	3419	1.01787	3419	23.1969	3707	2.29	3707	1		3419	172.819	1.01787	23.1969	#N/A	#N/A	29.6647	58.7763	25
4315	363.298	4315	1.02695	4315	27.0634	2427	1.71664	2427	1		4315	363.298	1.02695	27.0634	#N/A	#N/A	62.3608	44.0601	25
3291	170.681	3291	1.00943	3291	61.8661	3323	1.72782	3323	1		3291	170.681	1.00943	61.8661	#N/A	#N/A	29.2977	44.3471	25
475	42.3097	475	1.01818	475	55.9894	1787	2.3584	1787	2		475	42.3097	1.01818	55.9894	#N/A	#N/A	7.26255	60.5319	50
1499	242.165	1499	1.00883	1499	30.7021	3835	1.61043	3835	1		1499	242.165	1.00883	30.7021	#N/A	#N/A	41.5681	41.3341	25
3035	257.72	3035	1.01993	3035	181.375	507	1.78667	507	3		3035	257.72	1.01993	181.375	#N/A	#N/A	44.2382	45.8576	75
4155	409.039	4155	1.04121	4155	668.337	3579	1.87124	3579	2		4155	409.039	1.04121	668.337	#N/A	#N/A	70.2124	48.0282	50
3131	130.883	3131	1.04923	3131	91.2515	3067	1.4787	3067	1		3131	130.883	1.04923	91.2515	#N/A	#N/A	22.4663	37.953	25
3387	322.982	3387	1.03662	3387	129.231	2055	1.90271	2055	2		3387	322.982	1.03662	129.231	#N/A	#N/A	55.4405	48.8359	50
4283	349.052	4283	1.04068	4283	48.9527	2567	1.73987	2567	1		4283	349.052	1.04068	48.9527	#N/A	#N/A	59.9155	44.6564	25
3259	206.881	3259	1.05034	3259	235.082	2823	1.66436	2823	3		3259	206.881	1.05034	235.082	#N/A	#N/A	35.5115	42.7183	75
2747	338.651	2747	1.04305	2747	322.047	4231	2.79096	4231	3		2747	338.651	1.04305	322.047	#N/A	#N/A	58.1301	71.6342	75
3771	189.179	3771	1.02392	3771	87.3964	2183	2.34409	2183	2		3771	189.179	1.02392	87.3964	#N/A	#N/A	32.473	60.1646	50
3515	85.5932	3515	1.03269	3515	46.5172	1159	2.68929	1159	1		3515	85.5932	1.03269	46.5172	#N/A	#N/A	14.6922	69.0246	25
3003	305.309	3003	1.04531	3003	184.55	2695	1.91874	2695	2		3003	305.309	1.04531	184.55	#N/A	#N/A	52.4069	49.2473	50
4219	72.8082	4219	1.03501	4219	21.807	1415	2.11123	1415	2		4219	72.8082	1.03501	21.807	#N/A	#N/A	12.4977	54.1879	50
2171	80.2688	2171	1.06865	2171	63.5046	3463	1.49709	3463	1		2171	80.2688	1.06865	63.5046	#N/A	#N/A	13.7783	38.4251	25
3707	323.347	3707	1.03393	3707	56.8308	2375	1.30657	2375	1		3707	323.347	1.03393	56.8308	#N/A	#N/A	55.5032	33.5351	25
2427	279.566	2427	1.0376	2427	170.862	3399	1.89242	3399	2		2427	279.566	1.0376	170.862	#N/A	#N/A	47.9881	48.5718	50
4347	32.685	4347	1.02634	4347	108.447	3911	1.49087	3911	1		4347	32.685	1.02634	108.447	#N/A	#N/A	5.61045	38.2654	25
3323	231.257	3323	1.02895	3323	294.96	4295	1.99762	4295	3		3323	231.257	1.02895	294.96	#N/A	#N/A	39.6957	51.2719	75
1787	206.944	1787	1.04066	1787	91.0831	2247	3.07274	2247	4		1787	206.944	1.04066	91.0831	#N/A	#N/A	35.5224	78.8665	100
3835	237.721	3835	1.05436	3835	95.7167	3271	2.15679	3271	3		3835	237.721	1.05436	95.7167	#N/A	#N/A	40.8053	55.3572	75
507	135.856	507	1.01097	507	28.3184	2759	1.9691	2759	2		507	135.856	1.01097	28.3184	#N/A	#N/A	23.32	50.5399	50
3579	281.309	3579	1.0126	3579	32.9088	3527	2.27214	3527	3		3579	281.309	1.0126	32.9088	#N/A	#N/A	48.2873	58.3179	75
3067	241.988	3067	1.02755	3067	248.017	3015	1.75525	3015	2		3067	241.988	1.02755	248.017	#N/A	#N/A	41.5377	45.0511	50
2055	221.593	2055	1.02267	2055	84.1369	4135	2.28944	4135	1		2055	221.593	1.02267	84.1369	#N/A	#N/A	38.0369	58.7619	25
2567	429.134	2567	1.03102	2567	248.141	1319	1.85422	1319	2		2567	429.134	1.03102	248.141	#N/A	#N/A	73.6617	47.5913	50
2823	364.328	2823	1.0125	2823	74.9592	3879	2.14201	3879	1		2823	364.328	1.0125	74.9592	#N/A	#N/A	62.5376	54.9779	25
4231	65.1673	4231	1.01472	4231	50.9291	4263	1.79053	4263	2		4231	65.1673	1.01472	50.9291	#N/A	#N/A	11.1861	45.9566	50
2183	136.03	2183	1.02825	2183	77.0816	1191	1.83401	1191	2		2183	136.03	1.02825	77.0816	#N/A	#N/A	23.3498	47.0726	50
1159	411.131	1159	1.01113	1159	59.2931	3239	1.83618	3239	3		1159	411.131	1.01113	59.2931	#N/A	#N/A	70.5715	47.1283	75
2695	87.4721	2695	1.01812	2695	138.803	2983	1.38622	2983	1		2695	87.4721	1.01812	138.803	#N/A	#N/A	15.0148	35.5794	25
1415	135.53	1415	1.02879	1415	46.6859	4007	1.91829	4007	2		1415	135.53	1.02879	46.6859	#N/A	#N/A	23.264	49.2358	50
3463	172.272	3463	1.04654	3463	284.993	4199	1.71163	4199	1		3463	172.272	1.04654	284.993	#N/A	#N/A	29.5708	43.9315	25
2375	522.911	2375	1.05107	2375	115.961	3175	1.8914	3175	1		2375	522.911	1.05107	115.961	#N/A	#N/A	89.7587	48.5456	25
3399	407.556	3399	1.03541	3399	105	3431	2.32774	3431	2		3399	407.556	1.03541	105	#N/A	#N/A	69.9578	59.7449	50
3911	97.2929	3911	1.04059	3911	230.053	2919	1.8795	2919	1		3911	97.2929	1.04059	230.053	#N/A	#N/A	16.7005	48.2402	25
4295	338.687	4295	1.01119	4295	22.3281	3943	2.44294	3943	4		4295	338.687	1.01119	22.3281	#N/A	#N/A	58.1363	62.7017	100
2247	84.5907	2247	1.03806	2247	31.953	4327	3.25697	4327	2		2247	84.5907	1.03806	31.953	#N/A	#N/A	14.5202	83.595	50
3271	94.0154	3271	1.039	3271	64.716	3815	1.97989	3815	2		3271	94.0154	1.039	64.716	#N/A	#N/A	16.1379	50.8168	50
2759	431.499	2759	1.01148	2759	27.6721	3559	2.21132	3559	3		2759	431.499	1.01148	27.6721	#N/A	#N/A	74.0677	56.7568	75
3527	127.014	3527	1.02577	3527	43.0031	4119	2.16888	4119	2		3527	127.014	1.02577	43.0031	#N/A	#N/A	21.8022	55.6675	50
3015	181.438	3015	1.05878	3015	87.4194	3095	2.16125	3095	1		3015	181.438	1.05878	87.4194	#N/A	#N/A	31.1442	55.4717	25
4135	153.746	4135	1.02947	4135	107.862	4247	1.32355	4247	1		4135	153.746	1.02947	107.862	#N/A	#N/A	26.3908	33.9709	25
1319	39.2913	1319	1.0289	1319	127.64	2711	2.28178	2711	3		1319	39.2913	1.0289	127.64	#N/A	#N/A	6.74443	58.5653	75
3879	259.042	3879	1.02685	3879	137.31	3991	2.02371	3991	3		3879	259.042	1.02685	137.31	#N/A	#N/A	44.4651	51.9415	75
4263	397.463	4263	1.03111	4263	29.1413	4183	1.58745	4183	1		4263	397.463	1.03111	29.1413	#N/A	#N/A	68.2253	40.7443	25
1191	335.396	1191	1.00701	1191	46.5895	1623	2.15337	1623	2		1191	335.396	1.00701	46.5895	#N/A	#N/A	57.5714	55.2695	50
3239	289.708	3239	1.01661	3239	31.3888	2391	2.25588	2391	1		3239	289.708	1.01661	31.3888	#N/A	#N/A	49.729	57.9005	25
2983	78.2995	2983	1.0271	2983	178.585	3415	1.97043	3415	3		2983	78.2995	1.0271	178.585	#N/A	#N/A	13.4403	50.574	75
4007	300.831	4007	1.01917	4007	53.4038	2903	1.80244	2903	1		4007	300.831	1.01917	53.4038	#N/A	#N/A	51.6382	46.2623	25
4199	118.481	4199	1.02438	4199	300.669	4311	1.97852	4311	4		4199	118.481	1.02438	300.669	#N/A	#N/A	20.3375	50.7817	100
3175	332.196	3175	1.02313	3175	110.565	2775	2.03333	2775	2		3175	332.196	1.02313	110.565	#N/A	#N/A	57.0221	52.1885	50
3431	228.739	3431	1.07669	3431	131.009	3799	2.36157	3799	1		3431	228.739	1.07669	131.009	#N/A	#N/A	39.2635	60.6132	25
2919	417.1	2919	1.02426	2919	71.6338	3543	1.83405	3543	1		2919	417.1	1.02426	71.6338	#N/A	#N/A	71.5961	47.0736	25
3943	104.773	3943	1.02931	3943	57.557	3031	1.55975	3031	1		3943	104.773	1.02931	57.557	#N/A	#N/A	17.9845	40.0333	25
4327	506.982	4327	1.00587	4327	64.414	4055	2.23276	4055	1		4327	506.982	1.00587	64.414	#N/A	#N/A	87.0245	57.3071	25
3815	266.27	3815	1.04978	3815	54.1933	4151	1.77576	4151	1		3815	266.27	1.04978	54.1933	#N/A	#N/A	45.7058	45.5775	25
3559	208.262	3559	1.01423	3559	86.7185	3383	2.01857	3383	2		3559	208.262	1.01423	86.7185	#N/A	#N/A	35.7486	51.8096	50
4119	296.361	4119	1.01621	4119	57.4308	3895	2.52028	3895	2		4119	296.361	1.01621	57.4308	#N/A	#N/A	50.871	64.6868	50
3095	408.011	3095	1.03689	3095	125.296	4279	1.64471	4279	2		3095	408.011	1.03689	125.296	#N/A	#N/A	70.0359	42.2139	50
4247	523.46	4247	1.0426	4247	42.4712	2231	2.20476	2231	2		4247	523.46	1.0426	42.4712	#N/A	#N/A	89.853	56.5885	50
2711	104.589	2711	1.01219	2711	39.7733	1719	2.09254	1719	2		2711	104.589	1.01219	39.7733	#N/A	#N/A	17.9529	53.7082	50
3991	211.462	3991	1.03392	3991	38.0634	439	2.30528	439	2		3991	211.462	1.03392	38.0634	#N/A	#N/A	36.2979	59.1685	50
4183	429.392	4183	1.03232	4183	476.112	2999	1.86425	2999	3		4183	429.392	1.03232	476.112	#N/A	#N/A	73.706	47.8488	75
1623	314.897	1623	1.0097	1623	29.6036	4215	1.2296	4215	1		1623	314.897	1.0097	29.6036	#N/A	#N/A	54.0527	31.5595	25
2391	195.824	2391	1.02152	2391	109.104	3703	1.86753	3703	1		2391	195.824	1.02152	109.104	#N/A	#N/A	33.6136	47.9329	25
3415	147.248	3415	1.02033	3415	37.8558	887	1.93455	887	3		3415	147.248	1.02033	37.8558	#N/A	#N/A	25.2754	49.6531	75
2903	269.329	2903	1.05255	2903	86.3391	1271	2.3135	1271	3		2903	269.329	1.05255	86.3391	#N/A	#N/A	46.2309	59.3794	75
4311	132.641	4311	1.03347	4311	60.541	2807	1.60744	2807	2		4311	132.641	1.03347	60.541	#N/A	#N/A	22.7681	41.2574	50
2775	182.23	2775	1.028	2775	72.0948	1783	2.09486	1783	2		2775	182.23	1.028	72.0948	#N/A	#N/A	31.2801	53.7677	50
3799	75.1807	3799	1.02277	3799	91.9716	3831	2.08949	3831	3		3799	75.1807	1.02277	91.9716	#N/A	#N/A	12.9049	53.6299	75
3543	418.586	3543	1.0424	3543	819.945	3575	1.59327	3575	1		3543	418.586	1.0424	819.945	#N/A	#N/A	71.8511	40.8937	25
3031	273.799	3031	1.04079	3031	202.689	2039	2.19094	2039	2		3031	273.799	1.04079	202.689	#N/A	#N/A	46.9981	56.2337	50
4055	323.58	4055	1.04055	4055	157.208	4111	1.80779	4111	2		4055	323.58	1.04055	157.208	#N/A	#N/A	55.5432	46.3996	50
4151	313.996	4151	1.03775	4151	321.654	1551	2.71785	1551	1		4151	313.996	1.03775	321.654	#N/A	#N/A	53.898	69.7577	25
3383	294.512	3383	1.06261	3383	86.4534	2319	1.33949	2319	2		3383	294.512	1.06261	86.4534	#N/A	#N/A	50.5536	34.38	50
3895	0	3895	1.0553	3895	95.2212	3855	1.48562	3855	2		3895	0	1.0553	95.2212	#N/A	#N/A	0	38.1307	50
4279	345.65	4279	1.00151	4279	14.7784	143	3.61502	143	1		4279	345.65	1.00151	14.7784	#N/A	#N/A	59.3315	92.7849	25
2231	256.996	2231	1.03365	2231	57.6837	2191	2.25732	2191	2		2231	256.996	1.03365	57.6837	#N/A	#N/A	44.1139	57.9375	50
1719	179.545	1719	1.03227	1719	100.654	3471	1.53912	3471	1		1719	179.545	1.03227	100.654	#N/A	#N/A	30.8193	39.5038	25
439	195.978	439	1.01955	439	28.376	1935	1.87238	1935	3		439	195.978	1.01955	28.376	#N/A	#N/A	33.64	48.0574	75
2999	88.1438	2999	1.02026	2999	18.5647	3983	2.49424	3983	2		2999	88.1438	1.02026	18.5647	#N/A	#N/A	15.1301	64.0184	50
4215	130.808	4215	1.03309	4215	64.3897	4175	1.73494	4175	1		4215	130.808	1.03309	64.3897	#N/A	#N/A	22.4535	44.5298	25
3703	277.633	3703	1.03484	3703	145.312	3919	2.17938	3919	2		3703	277.633	1.03484	145.312	#N/A	#N/A	47.6563	55.937	50
887	168.915	887	1.03636	887	109.433	4303	1.85904	4303	3		887	168.915	1.03636	109.433	#N/A	#N/A	28.9946	47.715	75
2935	29.2157	2935	1.02415	2935	168.764	3279	2.11671	3279	2		2935	29.2157	1.02415	168.764	#N/A	#N/A	5.01493	54.3285	50
4343	6.64112	4343	1.01822	4343	37.9297	3791	1.44032	3791	1		4343	6.64112	1.01822	37.9297	#N/A	#N/A	1.13996	36.968	25
1271	209.376	1271	1.03277	1271	99.6707	2511	1.97289	2511	3		1271	209.376	1.03277	99.6707	#N/A	#N/A	35.9398	50.6372	75
2807	57.5877	2807	1.03331	2807	202.88	3535	1.84049	3535	1		2807	57.5877	1.03331	202.88	#N/A	#N/A	9.88504	47.2389	25
1783	254.954	1783	1.00233	1783	17.3295	4047	1.89714	4047	2		1783	254.954	1.00233	17.3295	#N/A	#N/A	43.7634	48.6929	50
3831	212.355	3831	1.03636	3831	66.2487	4143	2.29462	4143	1		3831	212.355	1.03636	66.2487	#N/A	#N/A	36.4512	58.8949	25
3575	43.9501	3575	1.02205	3575	169.58	303	2.09294	303	3		3575	43.9501	1.02205	169.58	#N/A	#N/A	7.54412	53.7184	75
2039	244.999	2039	1.06675	2039	64.5261	2351	1.77748	2351	1		2039	244.999	1.06675	64.5261	#N/A	#N/A	42.0546	45.6217	25
4111	235.927	4111	1.02334	4111	32.7412	3375	1.50094	3375	1		4111	235.927	1.02334	32.7412	#N/A	#N/A	40.4973	38.5239	25
1551	278.811	1551	1.04496	1551	104.915	2863	2.11379	2863	2		1551	278.811	1.04496	104.915	#N/A	#N/A	47.8585	54.2536	50
2319	244.478	2319	1.00932	2319	47.6479	4271	1.93093	4271	1		2319	244.478	1.00932	47.6479	#N/A	#N/A	41.9651	49.5602	25
3855	234.141	3855	1.01176	3855	78.306	3247	1.73062	3247	2		3855	234.141	1.01176	78.306	#N/A	#N/A	40.1908	44.4189	50
143	465.327	143	1.01967	143	41.0319	431	2.05258	431	4		143	465.327	1.01967	41.0319	#N/A	#N/A	79.8743	52.6825	100
2191	160.033	2191	1.02865	2191	71.2877	4207	3.89613	4207	4		2191	160.033	1.02865	71.2877	#N/A	#N/A	27.47	100	100
3471	224.845	3471	1.03487	3471	197.894	3695	2.4051	3695	3		3471	224.845	1.03487	197.894	#N/A	#N/A	38.5951	61.7305	75
1935	304.368	1935	1.05049	1935	103.705	2287	1.54519	2287	1		1935	304.368	1.05049	103.705	#N/A	#N/A	52.2454	39.6596	25
3983	197.204	3983	1.06467	3983	108.095	3311	2.23357	3311	2		3983	197.204	1.06467	108.095	#N/A	#N/A	33.8505	57.3279	50
4175	529.478	4175	1.10448	4175	370.1	2799	2.19474	2799	1		4175	529.478	1.10448	370.1	#N/A	#N/A	90.886	56.3313	25
3919	0	3919	1.03236	3919	208.761	2543	2.14459	2543	3		3919	0	1.03236	208.761	#N/A	#N/A	0	55.0441	75
4303	213.221	4303	1.04904	4303	83.0544	3567	1.67159	3567	2		4303	213.221	1.04904	83.0544	#N/A	#N/A	36.5998	42.9039	50
3279	210.79	3279	1.02541	3279	67.5506	4127	2.14027	4127	1		3279	210.79	1.02541	67.5506	#N/A	#N/A	36.1825	54.9332	25
3791	116.246	3791	1.02935	3791	191.62	2079	2.42118	2079	2		3791	116.246	1.02935	191.62	#N/A	#N/A	19.9539	62.1432	50
2511	154.929	2511	1.0261	2511	109.14	2335	1.51328	2335	1		2511	154.929	1.0261	109.14	#N/A	#N/A	26.5939	38.8406	25
3535	357.83	3535	1.0458	3535	214.876	3871	2.33945	3871	3		3535	357.83	1.0458	214.876	#N/A	#N/A	61.4222	60.0455	75
4047	224.038	4047	1.01806	4047	61.2626	4255	1.85234	4255	2		4047	224.038	1.01806	61.2626	#N/A	#N/A	38.4566	47.5431	50
4143	266.612	4143	1.02595	4143	144.805	2207	1.39573	2207	1		4143	266.612	1.02595	144.805	#N/A	#N/A	45.7645	35.8235	25
303	127.142	303	1.01753	303	34.352	1183	2.79096	1183	3		303	127.142	1.01753	34.352	#N/A	#N/A	21.8242	71.6342	75
2351	487.624	2351	1.04345	2351	230.246	2719	1.88041	2719	1		2351	487.624	1.04345	230.246	#N/A	#N/A	83.7016	48.2635	25
3375	244.297	3375	1.04762	3375	245.332	1695	2.0835	1695	1		3375	244.297	1.04762	245.332	#N/A	#N/A	41.9341	53.4761	25
2863	154.969	2863	1.00883	2863	33.6544	3487	2.22671	3487	2		2863	154.969	1.00883	33.6544	#N/A	#N/A	26.6007	57.1518	50
4271	378.045	4271	1.01912	4271	68.7833	1951	2.4096	1951	2		4271	378.045	1.01912	68.7833	#N/A	#N/A	64.8922	61.846	50
3247	36.3382	3247	1.01259	3247	69.5499	4191	1.50507	4191	1		3247	36.3382	1.01259	69.5499	#N/A	#N/A	6.23753	38.6299	25
431	156.736	431	1.06212	431	56.4217	2655	1.71251	2655	1		431	156.736	1.06212	56.4217	#N/A	#N/A	26.904	43.9541	25
4207	131.783	4207	1.05042	4207	126.521	3679	1.94902	3679	1		4207	131.783	1.05042	126.521	#N/A	#N/A	22.6208	50.0245	25
3695	179.547	3695	1.04003	3695	65.7589	3423	2.22403	3423	2		3695	179.547	1.04003	65.7589	#N/A	#N/A	30.8196	57.0831	50
4335	74.6213	4335	1.04083	4335	258.289	3935	2.15639	3935	4		4335	74.6213	1.04083	258.289	#N/A	#N/A	12.8089	55.347	100
2287	507.65	2287	1.08922	2287	372.824	4319	1.88901	4319	3		2287	507.65	1.08922	372.824	#N/A	#N/A	87.1391	48.4843	75
3311	266.987	3311	1.02565	3311	48.8732	2271	1.27573	2271	2		3311	266.987	1.02565	48.8732	#N/A	#N/A	45.8289	32.7435	50
2799	425.124	2799	1.01843	2799	72.134	1247	1.81271	1247	2		2799	425.124	1.01843	72.134	#N/A	#N/A	72.9734	46.5259	50
2543	150.81	2543	1.06742	2543	67.5769	3807	2.10403	3807	3		2543	150.81	1.06742	67.5769	#N/A	#N/A	25.8868	54.0031	75
3567	210.438	3567	1.01059	3567	58.541	4159	1.63278	4159	1		3567	210.438	1.01059	58.541	#N/A	#N/A	36.1221	41.9077	25
4127	174.902	4127	1.03707	4127	208.012	3647	2.05823	3647	2		4127	174.902	1.03707	208.012	#N/A	#N/A	30.0223	52.8275	50
2079	35.1546	2079	1.00619	2079	77.7557	2367	1.96524	2367	3		2079	35.1546	1.00619	77.7557	#N/A	#N/A	6.03436	50.4408	75
2335	88.7589	2335	1.01448	2335	132.634	3391	2.16277	3391	3		2335	88.7589	1.01448	132.634	#N/A	#N/A	15.2356	55.5107	75
3871	226.522	3871	1.02488	3871	35.495	4287	1.64788	4287	2		3871	226.522	1.02488	35.495	#N/A	#N/A	38.883	42.2953	50
4255	384.166	4255	1.00499	4255	9.42753	3519	1.70943	3519	2		4255	384.166	1.00499	9.42753	#N/A	#N/A	65.9429	43.8751	50
2207	531.927	2207	1.06638	2207	120.936	3007	1.61863	3007	3		2207	531.927	1.06638	120.936	#N/A	#N/A	91.3063	41.5446	75
1183	58.1678	1183	1.04145	1183	85.8712	4031	1.4975	4031	1		1183	58.1678	1.04145	85.8712	#N/A	#N/A	9.98462	38.4356	25
2719	409.005	2719	1.06832	2719	161.619	4223	2.35925	4223	2		2719	409.005	1.06832	161.619	#N/A	#N/A	70.2065	60.5537	50
1695	263.966	1695	1.02602	1695	93.8647	1151	1.69474	1151	2		1695	263.966	1.02602	93.8647	#N/A	#N/A	45.3103	43.498	50
3487	313.709	3487	1.01008	3487	30.4344	2687	2.43842	2687	1		3487	313.709	1.01008	30.4344	#N/A	#N/A	53.8488	62.5857	25
1951	281.425	1951	1.02845	1951	56.7538	3711	2.90616	3711	1		1951	281.425	1.02845	56.7538	#N/A	#N/A	48.3072	74.5909	25
4191	324.201	4191	1.04954	4191	346.606	3967	1.97852	3967	4		4191	324.201	1.04954	346.606	#N/A	#N/A	55.6498	50.7817	100
2655	234.44	2655	1.03017	2655	102.948	2303	1.54158	2303	1		2655	234.44	1.03017	102.948	#N/A	#N/A	40.2421	39.567	25
3679	137.826	3679	1.0432	3679	348.831						3679	137.826	1.0432	348.831	#N/A	#N/A	23.6581	0	0
3423	53.7714	3423	1.03183	3423	83.2604						3423	53.7714	1.03183	83.2604	#N/A	#N/A	9.22997	0	0
3935	67.5144	3935	1.02996	3935	32.5553						3935	67.5144	1.02996	32.5553	#N/A	#N/A	11.589	0	0
4319	415.914	4319	1.04711	4319	102.922						4319	415.914	1.04711	102.922	#N/A	#N/A	71.3925	0	0
2271	549.766	2271	1.04603	2271	218.836						2271	549.766	1.04603	218.836	#N/A	#N/A	94.3684	0	0
1247	109.185	1247	1.0232	1247	87.6275						1247	109.185	1.0232	87.6275	#N/A	#N/A	18.7418	0	0
3807	212.049	3807	1.04796	3807	78.1365						3807	212.049	1.04796	78.1365	#N/A	#N/A	36.3986	0	0
4159	525.643	4159	1.05411	4159	145.838						4159	525.643	1.05411	145.838	#N/A	#N/A	90.2277	0	0
3647	309.98	3647	1.01733	3647	39.4574						3647	309.98	1.01733	39.4574	#N/A	#N/A	53.2087	0	0
2367	112.523	2367	1.02774	2367	27.3047						2367	112.523	1.02774	27.3047	#N/A	#N/A	19.3148	0	0
3391	77.8906	3391	1.00688	3391	21.5824						3391	77.8906	1.00688	21.5824	#N/A	#N/A	13.3701	0	0
4287	330.178	4287	1.0395	4287	156.986						4287	330.178	1.0395	156.986	#N/A	#N/A	56.6757	0	0
3519	251.667	3519	1.01696	3519	46.9866						3519	251.667	1.01696	46.9866	#N/A	#N/A	43.1991	0	0
3007	326.142	3007	1.01617	3007	63.82						3007	326.142	1.01617	63.82	#N/A	#N/A	55.9829	0	0
4031	87.0477	4031	1.04958	4031	188.872						4031	87.0477	1.04958	188.872	#N/A	#N/A	14.9419	0	0
4223	111.128	4223	1.04267	4223	85.0066						4223	111.128	1.04267	85.0066	#N/A	#N/A	19.0753	0	0
1151	95.2037	1151	1.01936	1151	234.121						1151	95.2037	1.01936	234.121	#N/A	#N/A	16.3419	0	0
2687	426.937	2687	1.00556	2687	60.594						2687	426.937	1.00556	60.594	#N/A	#N/A	73.2846	0	0
3711	354.156	3711	1.01201	3711	49.0087						3711	354.156	1.01201	49.0087	#N/A	#N/A	60.7916	0	0
3967	136.373	3967	1.02404	3967	42.3863						3967	136.373	1.02404	42.3863	#N/A	#N/A	23.4087	0	0
4351	63.6245	4351	1.03515	4351	78.9962						4351	63.6245	1.03515	78.9962	#N/A	#N/A	10.9213	0	0
2303	496.88	2303	1.11924	2303	507.648						2303	496.88	1.11924	507.648	#N/A	#N/A	85.2905	0	0

## Sheet: analysis
																								0.05	0.15	0.25	0.35	0.45	0.55	0.65	0.75	0.85	0.95
0	10	5		1.0204	97.8956			40.3808	31.0417					1.033	137.548			48.7616	48.5795				C. hirsuta	1.0204	1.02246	1.02429	1.02541	1.02502	1.02577	1.02228	1.02939	1.02728	1.02412
10	20	15		1.02246	89.5631			39.6884	33.5648					1.02843	94.1551			47.9383	48.2143				A. thaliana	1.033	1.02843	1.03124	1.03021	1.03068	1.03231	1.03305	1.03569	1.03923	1.04815
20	30	25		1.02429	93.7106			40.2024	33.6777					1.03124	92.5666			49.3898	48.7654
30	40	35		1.02541	85.2912			44.0212	41.6667					1.03021	99.1503			51.3337	48.8235
40	50	45		1.02502	94.4235			37.8	31.0976					1.03068	99.6586			50.8057	51.3804
50	60	55		1.02577	79.6327			41.8421	36.2319					1.03231	107.697			49.1249	45.2555
60	70	65		1.02228	78.2592			44.6246	36.5991					1.03305	127.589			48.3946	47.0183
70	80	75		1.02939	81.5342			43.4345	36.5385					1.03569	163.289			48.1128	46.0366
80	90	85		1.02728	89.0206			42.2699	34.6875					1.03923	178.305			48.081	43.5185
90	100	95		1.02412	126.08			40.1376	34.7222					1.04815	202.801			43.968	43.75
0	5			1.02033	112.616			42.5866	30.6034					1.03377	144.863			49.2675	47.9167
5	10			1.02046	85.7729			38.3173	31.4516					1.03208	128.769			48.1545	49.375
10	15			1.02452	92.6023			40.4872	34.2593					1.02718	88.1716			45.4957	42.9688
15	20			1.0202	86.2273			38.8897	32.8704					1.02949	99.1939			49.9952	52.6316
20	25			1.02309	88.272			39.3098	31.7797					1.03012	93.1306			48.0515	50
25	30			1.02544	98.9315			41.0517	35.4839					1.03242	91.9741			50.7958	47.4684
30	35			1.02484	82.5314			45.8536	44.4079					1.03155	105.556			49.3398	48.1013
35	40			1.02614	88.7831			41.775	38.3065					1.02904	93.5894			53.0646	49.4505
40	45			1.02285	102.158			36.4458	29.6875					1.03017	102.051			49.7999	52.1605
45	50			1.02644	89.3516			38.6666	32					1.03119	97.2957			51.7993	50.6098
50	55			1.0243	79.0224			41.7145	37					1.03242	104.515			48.1025	42.3611
55	60			1.02715	80.2083			41.9615	35.514					1.0322	111.221			50.2573	48.4615
60	65			1.02152	74.3202			45.5521	36.8056					1.03087	119.614			48.753	47.1311
65	70			1.02301	82.027			43.746	36.4035					1.03582	137.723			47.9393	46.875
70	75			1.03147	76.0761			43.4777	36.7347					1.03421	162.022			46.3805	42.4419
75	80			1.02598	90.4762			43.3615	36.2069					1.03733	164.686			50.0228	50
80	85			1.02537	86.8114			43.0008	36.3095					1.0392	207.512			49.7553	46
85	90			1.02936	91.4306			41.4621	32.8947					1.03926	153.127			46.6376	41.3793
90	95			1.02198	102.209			39.7666	34					1.05259	217.831			44.2472	42.5
95	100			1.02972	188.739			40.9807	36.3636					1.03706	165.228			43.2698	46.875
Ox	LABEL	distance	distance (relative)	lobey	area	growth	proli	growth (relative)	proli (relative)	Col-0	LABEL	distance	distance (relative)	lobey	area	growth	proli	growth (relative)	proli (relative)
	1024	536.286	87.201	1.02319	101.507	1.25699	1	35.2987	25		4096	115.035	19.746	1.02075	235.799	1.77826	1	45.6417	25
	512	376.803	61.2688	1.02212	24.9896	1.48594	2	41.728	50		3584	314.143	53.9233	1.00667	23.1072	2.05823	2	52.8275	50
	256	411.154	66.8543	1.02443	95.8541	2.1386	1	60.056	25		256	7.70404	1.32241	1.01457	78.235	1.69745	2	43.5676	50
	1280	322.52	52.4423	1.01444	63.2838	1.35135	1	37.9485	25		3328	262.467	45.053	1.04567	129.197	2.07739	2	53.3193	50
	768	348.98	56.7447	1.02039	59.0805	1.4797	2	41.5528	50		4224	97.218	16.6877	1.02902	62.497	3.30744	2	84.8904	50
	128	395.073	64.2395	1.03211	109.119	1.40547	1	39.4683	25		3200	133.996	23.0007	1.03324	77.7226	1.91093	2	49.0469	50
	1152	265.897	43.2353	1.00818	79.2256	1.14008	1	32.0156	25		2688	59.9838	10.2963	1.03437	144.267	1.80204	1	46.2521	25
	640	115.454	18.773	1.01273	71.0246	1.01211	1	28.422	25		3712	259.016	44.4606	1.0524	411.493	2.25759	1	57.9444	25
	384	467.807	76.0662	1.03657	34.2267	1.58143	3	44.4096	75		2432	519.655	89.1998	1.05411	109.733	1.30483	1	33.4904	25
	896	205.001	33.3335	1.06516	153.338	1.19727	1	33.6216	25		1408	77.9829	13.3859	1.01054	34.2169	2.16277	3	55.5107	75
	64	371.979	60.4844	1.01375	65.2656	1.36864	2	38.434	50		4160	523.237	89.8147	1.02361	47.6437	1.00839	1	25.8818	25
	1088	249.985	40.648	1.01627	70.0456	1.04555	1	29.3611	25		1088	445.656	76.4977	1.03856	53.2103	1.86649	3	47.9063	75
	576	353.951	57.553	1.03083	49.4726	1.3893	3	39.0142	75		1600	190.143	32.6384	1.03172	74.8573	1.87804	1	48.2027	25
	320	8.48676	1.37996	1.01194	58.826	2.20415	1	61.8968	25		3648	55.2454	9.48298	1.03111	30.4483	1.68656	3	43.2881	75
	832	183.252	29.7971	1.02319	86.5692	1.19739	1	33.625	25		3392	356.869	61.2573	1.0295	57.4633	1.85678	2	47.657	50
	192	553.899	90.0649	1.02183	161.713	1.51006	1	42.4054	25		4288	318.034	54.5912	1.03368	18.0229	2.19122	2	56.2409	50
	1216	340.016	55.2872	1.01819	77.7496	1.85371	1	52.0557	25		2752	374.231	64.2375	1.00516	37.875	1.68396	2	43.2214	50
	704	138.93	22.5902	1.0159	58.2938	1.12255	1	31.5234	25		2496	388.179	66.6317	1.04395	334.342	1.55575	1	39.9306	25
	448	50.9748	8.28859	1.02236	161.36	1.24077	1	34.8432	25		3520	100.867	17.314	1.03149	73.8819	1.78303	2	45.7641	50
	960	210.528	34.2322	1.01175	53.8375	1.20131	1	33.7351	25		3008	126.594	21.7301	1.03683	75.0493	1.63509	1	41.967	25
	32	383.554	62.3665	1.02253	87.0642	1.45422	1	40.8373	25		4032	293.262	50.339	1.04825	129.446	1.63912	1	42.0705	25
	1056	306.873	49.898	1.02875	47.7146	1.648	2	46.279	50		4128	175.967	30.2051	1.03711	34.1686	1.82808	3	46.9204	75
	544	397.277	64.5979	1.0149	74.6385	2.00461	3	56.2933	75		4256	385.155	66.1126	1.04604	92.7265	1.57439	1	40.4091	25
	1312	177.281	28.8262	1.02864	91.5877	1.12694	2	31.6466	50		2208	207.843	35.6767	1.02005	78.0631	2.3716	1	60.8707	25
	800	168.373	27.3777	1.02062	48.4265	1.08598	1	30.4964	25		1184	196.974	33.811	1.01914	39.7767	1.80631	2	46.3616	50
	160	469.981	76.4197	1.03402	68.0823	1.08598	1	30.4964	25		3232	259.292	44.508	1.02957	112.678	1.66046	2	42.6182	50
	1184	322.365	52.4171	1.01305	37.9367	1.99454	2	56.0105	50		4000	269.707	46.2957	1.0161	34.6791	2.30989	3	59.2868	75
	672	426.291	69.3156	1.01299	47.501	1.75627	2	49.3194	50		4192	301.744	51.795	1.02772	199.332	1.54753	1	39.7197	25
	416	33.8569	5.50519	1.00689	48.1879	1.05771	1	29.7025	25		3168	287.248	49.3067	1.02653	150.386	1.66282	2	42.6788	50
	928	198.655	32.3016	1.0086	40.8546	0.905114	1	25.4173	25		1632	294.995	50.6365	1.02272	72.8916	1.90631	2	48.9283	50
	96	333.316	54.1977	1.03595	43.8968	1.54324	1	43.3371	25		3424	251.474	43.166	1.02508	99.0791	2.07739	2	53.3193	50
	1120	308.617	50.1816	1.0199	43.9897	1.66036	3	46.6261	75		4320	417.169	71.6079	1.07052	321.58	1.88876	1	48.4778	25
	608	108.29	17.6081	1.03606	101.784	1.20694	1	33.8932	25		1248	304.699	52.3022	1.00899	21.9217	1.90278	3	48.8377	75
	352	445.335	72.4122	1.02089	69.7629	1.57465	1	44.2192	25		3808	218.757	37.5501	1.03415	57.5245	1.32432	2	33.9907	50
	864	183.298	29.8046	1.01087	72.2786	1.50284	1	42.2026	25		2528	96.6837	16.596	1.01779	73.2046	1.66783	2	42.8073	50
	224	340.359	55.3429	1.01148	59.3548	1.53043	1	42.9774	25		3088	15.6453	2.68555	1.04818	136.19	1.93259	2	49.6028	50
	1248	357.463	58.1241	1.02723	85.2171	1.5559	2	43.6927	50		2832	455.567	78.199	1.01357	85.5542	1.54352	2	39.6167	50
	736	141.166	22.9538	1.03745	55.973	1.52654	1	42.8682	25		4240	517.471	88.8249	1.02496	44.0606	1.94329	2	49.8774	50
	480	66.8683	10.8729	1.02976	189.36	1.58556	1	44.5256	25		2192	574.608	98.6326	1.05671	252.606	1.2105	1	31.0693	25
	992	399.741	64.9985	1.01527	75.7066	1.7879	1	50.2077	25		3472	154.335	26.4919	1.04756	95.6688	2.14789	4	55.1288	100
	16	361.153	58.7241	1.01041	41.5696	1.69595	2	47.6255	50		1936	311.665	53.4979	1.00927	50.9049	1.87238	3	48.0574	75
	1040	304.504	49.5128	1.01357	48.5178	1.97866	3	55.5646	75		3984	281.938	48.3952	1.04667	53.3474	2.08564	3	53.5311	75
	528	63.4674	10.3199	1.00726	88.9884	1.52784	2	42.9047	50		4176	532.635	91.4279	1.04573	143.446	1.43375	1	36.7993	25
	272	549.789	89.3966	1.01468	87.7939	1.68296	1	47.2607	25		848	520.016	89.2618	1.01733	35.184	1.83187	1	47.0177	25
	1296	348.121	56.605	1.01881	78.3701	1.38538	2	38.9041	50		4304	235.231	40.3779	1.00977	14.3004	2.01191	3	51.6387	75
	784	160.98	26.1756	1.01957	49.5019	0.977347	1	27.4458	25		2256	227.449	39.0421	1.0063	43.2044	1.98725	3	51.0057	75
	144	424.212	68.9776	1.01174	68.1352	1.59394	2	44.7609	50		3280	276.928	47.5352	1.04994	95.1963	1.83618	3	47.1283	75
	1168	524.149	85.2275	1.03191	88.4926	1.78945	2	50.2512	50		3792	122.874	21.0916	1.02611	153.334	1.54007	2	39.5282	50
	656	125.025	20.3293	1.02038	89.9678	1.1682	1	32.8053	25		4048	257.011	44.1165	1.03309	50.1017	2.09486	2	53.7677	50
	400	439.087	71.3963	1.01729	47.2534	1.60346	2	45.0282	50		4144	272.264	46.7347	1.03197	161	2.46492	1	63.2659	25
	912	494.79	80.4537	1.04681	147.491	1.8276	1	51.3225	25		3120	255.428	43.8447	1.03764	245.751	1.44246	1	37.0229	25
	1104	281.981	45.8506	1.01615	55.296	1.21657	1	34.1636	25		2608	416.596	71.5095	1.02797	182.853	1.65148	2	42.3877	50
	592	98.6275	16.037	1.02893	168.48	1.78383	1	50.0934	25		304	165.077	28.3358	1.00665	24.877	1.76397	2	45.2749	50
	336	11.0154	1.79112	1.00844	103.335	1.20395	1	33.8092	25		1328	8.56046	1.46942	1.03742	59.6828	2.07928	2	53.3678	50
	848	187.445	0	1.02735	91.0195	2.5476	2	71.5415	50		3888	333.522	57.2497	1.04907	107.592	2.21835	1	56.9373	25
	208	415.758	30.4789	1.03849	70.2426	1.99041	1	55.8945	25		4272	374.42	64.2699	1.04323	207.939	1.7468	1	44.8342	25
	1232	559.38	67.6029	1.03717	154.843	1.44997	1	40.7179	25		3248	371.283	63.7315	1.04082	61.0422	1.7991	2	46.1766	50
	720	130.015	90.9561	1.00995	36.37	0.80762	2	22.6795	50		1712	240.652	41.3084	1.02604	56.2024	1.80779	2	46.3996	50
	464	48.0633	21.1407	1.01769	51.4072	1.0205	1	28.6576	25		3760	314.443	53.9748	1.06503	127.69	1.80606	1	46.3552	25
	976	369.825	7.81517	1.03517	64.6131	1.48594	2	41.728	50		3504	153.241	26.3041	1.03045	145.019	1.31338	1	33.7099	25
	48	242.907	60.1341	1.01205	196.878	1.30141	1	36.5461	25		4208	134.804	23.1394	1.02244	109.78	3.89613	4	100	100
	1072	515.743	39.4971	1.00511	74.1	1.60726	3	45.1349	75		3184	365.036	62.6592	1.04625	145.655	1.83	1	46.9697	25
	560	83.3603	83.8607	1.02773	64.5922	1.06234	1	29.8325	25		3696	222.002	38.1071	1.02745	56.5718	2.10403	3	54.0031	75
	304	437.908	13.5545	1.01644	36.9511	1.4818	2	41.6118	50		368	317.982	54.5823	1.04998	62.486	2.28664	1	58.69	25
	1328		71.2046			1.4818	2	41.6118	50		2288	62.2212	10.6804	1.03622	152.821	1.41188	1	36.238	25
	816	180.965	29.4252	1.05348	176.738	1.45834	1	40.953	25		2800	0	0	1.03376	215.821	2.52028	2	64.6868	50
	176	413.775	67.2805	1.02273	70.6343	1.41196	1	39.6505	25		3824	320.547	55.0225	1.02672	91.1696	1.80215	1	46.2549	25
	1200	330.831	53.7937	1.02568	112.073	1.59433	1	44.7718	25		2544	157.995	27.1202	1.01734	29.8616	2.14459	3	55.0441	75
	688	404.313	65.742	1.01501	55.1793	2.00461	3	56.2933	75		3568	214.17	36.7627	1.02406	93.4046	1.67159	2	42.9039	50
	432	47.5931	7.73872	1.02826	157.544	1.27557	1	35.8205	25		4104	196.378	33.7087	1.03588	64.2423	2.30528	2	59.1685	50
	944	207.819	33.7917	1.01865	76.1661	1.44507	1	40.5803	25		2056	224.887	38.6023	1.02306	85.4255	2.29446	1	58.8907	25
	112	582.583	94.7289	1.01382	200.204	1.50536	1	42.2734	25		3080	294.131	50.4882	1.02445	182.675	1.43211	1	36.7572	25
	1136	375.573	61.0688	1.05381	62.478	1.77115	1	49.7373	25		2568	441.768	75.8304	1.02872	68.0799	1.46899	3	37.7038	75
	624	96.2887	15.6567	1.0089	61.804	1.17749	1	33.0662	25		1288	284.538	48.8415	1.01155	22.3877	1.83618	3	47.1283	75
	368	23.2288	3.77704	1.01929	60.3524	1.19786	1	33.6382	25		3336	337.786	57.9816	1.05131	102.808	1.8466	2	47.3957	50
	880	199.042	32.3646	1.02009	75.1292	2.14573	4	60.2562	100		4232	72.7298	12.4842	1.02477	78.6909	2.02809	2	52.054	50
	240	538.724	87.5974	1.0169	77.7918	1.52004	1	42.6856	25		2184	195.166	33.5006	1.02711	164.661	2.29038	1	58.786	25
	1264	365.769	59.4746	1.01011	66.5118	1.5559	2	43.6927	50		3464	148.728	25.5295	1.02804	107.989	1.65433	2	42.4609	50
	752	355.757	57.8467	1.02437	41.0896	1.23439	2	34.664	50		4168	578.164	99.243	1.01686	73.4087	0.828592	1	21.2671	25
	496	57.9452	9.42198	1.01483	44.9031	1.03085	1	28.9482	25		4296	274.093	47.0486	1.00681	15.2668	1.84925	3	47.4638	75
	1008	558.32	90.7837	1.0104	73.2443	1.61134	2	45.2495	50		3272	211.302	36.2704	1.02995	299.672	1.58785	1	40.7545	25
	8	323.253	52.5615	1.02226	100.507	1.22817	1	34.4894	25		2760	445.864	76.5335	1.04596	59.8937	2.67738	2	68.719	50
	1032	236.377	38.4353	1.01474	134.182	1.25505	1	35.2442	25		3784	28.786	4.94117	1.05952	228.04	2.2675	2	58.1988	50
	520	68.7915	11.1856	1.00984	70.3886	1.2067	1	33.8865	25		456	95.8124	16.4464	1.00575	31.5281	2.24494	4	57.6197	100
	264	430	69.9187	1.0155	76.4114	1.62746	2	45.7022	50		2504	486.219	83.4605	1.00936	39.7838	1.8526	2	47.5497	50
	1288	390.608	63.5135	1.00529	22.086	1.80559	3	50.7044	75		3528	306.8	52.6628	1.10534	51.5329	1.59797	2	41.0143	50
	776	156.692	25.4784	1.02094	114.539	1.16938	1	32.8384	25		3016	189.282	32.4906	1.03531	80.2168	1.75525	2	45.0511	50
	136	435.89	70.8764	1.02548	153.038	1.72501	1	48.4416	25		4136	163.305	28.0316	1.03063	97.6573	1.94658	1	49.9619	25
	1160	322.224	52.3941	1.02801	132.087	1.83422	1	51.5084	25		2600	389.07	66.7846	1.04612	200.359	1.54173	1	39.5708	25
	648	126.678	20.598	1.03165	241.593	1.55638	1	43.7061	25		3368	188.661	32.384	1.04802	227.088	1.70245	1	43.6959	25
	392	453.656	73.7652	1.01596	102.44	1.80184	1	50.5991	25		3880	298.532	51.2436	1.048	127.788	1.87685	1	48.1722	25
	904	205.932	33.4849	1.01691	73.8521	2.14573	4	60.2562	100		168	13.1707	2.26078	1.01804	94.6571	1.69745	2	43.5676	50
	72	431.89	70.226	1.05026	31.6128	1.48036	1	41.5714	25		4264	392.187	67.3197	1.01846	51.7397	2.2493	2	57.7316	50
	1096	323.319	52.5722	1.01511	31.1046	1.82957	2	51.3778	50		2216	227.434	39.0395	1.05361	106.633	2.10734	1	54.088	25
	584	89.5375	14.5589	1.0158	65.2832	1.44086	1	40.4621	25		2728	466.86	80.1375	1.01429	54.9467	1.99597	1	51.2296	25
	328	453.861	73.7985	1.03741	28.7174	1.44572	2	40.5986	50		3752	251.298	43.1358	1.02897	46.4402	2.19999	3	56.466	75
	1352	509.274	82.8088	1.04612	49.1974	1.6806	1	47.1945	25		4200	93.8279	16.1057	1.03578	321.152	1.55996	1	40.0387	25
	840	192.499	31.3007	1.04181	108.268	2.31624	4	65.0445	100		1128	399.656	68.6018	1.04221	131.651	2.1668	1	55.6142	25
	200	347.689	56.5348	1.02491	102.133	1.62192	1	45.5466	25		3176	126.671	21.7433	1.01239	76.9819	1.91093	2	49.0469	50
	1224	284.759	46.3023	1.02061	188.784	1.12317	1	31.5408	25		3432	317.34	54.472	1.04596	54.3385	1.47225	1	37.7875	25
	712	491.3	79.8862	1.03181	216.891	1.46076	1	41.0209	25		872	504.931	86.6724	1.03961	120.12	1.75991	1	45.1707	25
	456	444.874	72.3372	1.00323	49.3967	1.60346	2	45.0282	50		3944	112.719	19.3484	1.02074	43.084	2.44294	4	62.7017	100
	968	217.749	35.4063	1.02824	76.3988	1.10735	1	31.0965	25		4328	505.46	86.7632	1.01322	79.0019	3.25697	2	83.595	50
	40	609.946	99.1782	1.06029	827.811	1.10735	1	31.0965	25		3816	287.647	49.3752	1.00446	32.5336	1.93286	2	49.6097	50
	1064	258.686	42.0628	1.02309	49.2524	1.15979	2	32.5691	50		2536	423.886	72.7609	1.03463	89.1489	1.45281	2	37.2885	50
	552	70.4657	11.4578	1.01351	122.802	2.85473	2	80.1663	50		1512	146.491	25.1455	1.02126	61.743	1.96578	3	50.4547	75
	296	360.188	58.5672	1.0317	81.9624	1.49964	1	42.1128	25		3048	95.7197	16.4305	1.03412	183.031	1.65158	1	42.3903	25
	1320	389.687	63.3637	1.02093	74.4988	2.40376	1	67.5022	25		3096	36.3581	6.24094	1.02597	289.277	2.11231	1	54.2156	25
	808	170.79	27.7707	1.02889	65.8104	1.68964	2	47.4483	50		2584	129.701	22.2634	1.02836	110.197	1.95754	2	50.2432	50
	168	426.518	69.3525	1.01454	96.5316	1.67127	1	46.9325	25		3608	132.433	22.7324	1.03727	138.204	2.46665	1	63.3103	25
	1192	272.042	44.2345	1.01724	74.4402	1.0163	1	28.5397	25		3864	258.569	44.3839	1.01572	57.836	2.39701	2	61.5228	50
	680	468.633	76.2005	1.03207	56.9226	1.78797	2	50.2096	50		4248	502.667	86.2838	1.03504	38.2384	1.47438	2	37.8422	50
	424	39.275	6.38618	1.0199	82.3459	1.14476	1	32.1471	25		2456	464.005	79.6474	1.05836	287.422	1.92076	1	49.2992	25
	936	220.636	35.8758	1.03043	67.8481	1.14476	1	32.1471	25		3480	287.403	49.3333	1.06267	99.5299	1.92965	1	49.5274	25
	104	417.53	67.8911	1.01293	64.311	1.59394	2	44.7609	50		1944	145.907	25.0452	1.04216	110.135	2.03104	2	52.1297	50
	1128	271.145	44.0886	1.01661	82.9984	1.08912	1	30.5846	25		3992	229.555	39.4036	1.01559	62.5022	2.32927	2	59.7842	50
	616	100.437	16.3312	1.01057	49.4338	1.49918	2	42.0999	50		4184	398.123	68.3386	1.04283	404.79	1.59113	1	40.8387	25
	360	399.685	64.9894	1.01251	62.0194	1.40339	1	39.4099	25		3160	219.299	37.6431	1.04719	83.3095	2.25872	2	57.9734	50
	872	203.025	33.0122	1.0338	88.1856	2.31624	4	65.0445	100		3416	194.688	33.4186	1.02733	254.329	1.5529	1	39.8575	25
	232	449.378	73.0696	1.0563	39.3502	1.71476	2	48.1538	50		2904	76.313	13.0993	1.02501	170.411	1.62052	1	41.5931	25
	1256	298.895	48.6008	1.00923	31.6392	0.958085	1	26.9049	25		3928	220.507	37.8505	1.05813	133.711	2.33945	3	60.0455	75
	744	472.714	76.8641	1.05049	238.749	1.49718	1	42.0437	25		4312	134.752	23.1305	1.02292	29.3528	1.78667	3	45.8576	75
	488	427.487	69.5101	1.03422	99.4851	1.72982	1	48.5767	25		3288	322.135	55.2951	1.0204	43.5123	2.65174	1	68.0609	25
	1000	219.014	35.612	1.02714	63.4187	1.31616	2	36.9603	50		1496	299.599	51.4268	1.0092	22.1875	1.76307	2	45.2518	50
	24	395.976	64.3863	1.02422	117.225	1.70258	1	47.8117	25		4056	337.525	57.9368	1.04176	132.035	1.5886	1	40.7738	25
	1048	506.329	82.3299	1.04864	111.791	1.73169	1	48.6292	25		4152	334.498	57.4173	1.02889	230.704	1.88809	1	48.4607	25
	536	83.9048	13.6431	1.04171	127.215	1.0738	1	30.1544	25		3640	256.708	44.0644	1.01124	25.3527	2.33972	3	60.0524	75
	280	390.767	63.5393	1.00651	64.0158	1.59057	2	44.6663	50		2360	105.257	18.0676	1.03505	62.721	1.66783	2	42.8073	50
	1304	122.301	19.8863	1.05448	73.9454	1.73287	2	48.6623	50		1336	134.868	23.1504	1.02695	59.5769	2.11123	2	54.1879	50
	792	480.699	78.1624	1.01939	41.431	1.61309	2	45.2987	50		3384	60.5653	10.3962	1.03322	135.442	1.99933	2	51.3158	50
	152	399.674	64.9876	1.0247	43.544	1.52973	2	42.9578	50		2872	385.283	66.1346	1.0528	225.028	1.87046	1	48.0082	25
	1176	353.226	57.4351	1.03337	83.1611	1.96743	1	55.2492	25		3896	0	0	1.04318	152.601	1.89005	2	48.511	50
	664	121.93	19.826	1.00873	59.6311	1.07838	1	30.283	25		184	137.745	23.6442	1.02326	64.0119	2.39666	3	61.5139	75
	408	44.5791	7.24863	1.04242	202.226	1.0546	1	29.6152	25		4280	338.882	58.1698	1.0385	46.767	1.72714	2	44.3296	50
	920	354.527	57.6467	1.01799	52.919	1.17043	2	32.8679	50		2232	532.115	91.3386	1.09651	256.551	1.51527	1	38.8917	25
	88	425.254	69.147	1.01522	91.6876	1.88708	1	52.9928	25		1720	186.567	32.0246	1.02052	33.1702	2.32687	3	59.7226	75
	1112	408.718	66.4582	1.01716	46.7709	1.81455	2	50.956	50		4216	102.678	17.6249	1.04121	79.1089	2.79385	2	71.7083	50
	600	88.8986	14.4551	1.01316	61.9148	1.25087	2	35.1268	50		2168	219.636	37.701	1.05507	96.5388	1.90271	2	48.8359	50
	344	13.9194	2.26332	1.01309	78.8803	1.73583	1	48.7454	25		1144	352.635	60.5305	1.01911	120.131	1.65424	2	42.4585	50
	856	384.988	62.5997	1.04958	63.8234	1.55728	1	43.7314	25		3192	22.958	3.94079	1.04981	139.932	2.24924	1	57.7301	25
	216	351.186	57.1034	1.0136	92.8734	1.70433	1	47.8609	25		2680	32.1201	5.51348	1.04243	107.043	1.93259	2	49.6028	50
	1240	293.795	47.7715	1.0199	95.9986	1.0376	1	29.1378	25		3704	303.047	52.0186	1.04967	81.2945	1.96618	1	50.4649	25
	728	479.411	77.953	1.00899	25.9765	1.63669	2	45.9614	50		2424	267.178	45.8616	1.04067	168.292	2.01822	1	51.8006	25
	472	43.4323	7.06216	1.01132	86.5696	1.34426	1	37.7494	25		3448	138.865	23.8365	1.03648	97.7242	1.65433	2	42.4609	50
	984	241.016	39.1896	1.07018	80.4203	1.34426	1	37.7494	25		3960	128.878	22.1222	1.04114	68.3516	1.8258	2	46.8619	50
	56	450.674	73.2803	1.06797	38.9923	1.64001	2	46.0546	50		4344	0	0	1.02599	151.038			50.1575	50
	1080	265.042	43.0963	1.02834	36.2949	1.15979	2	32.5691	50		3320	275.792	47.3403	1.03455	115.119			56.4332	75
	568	92.1678	14.9866	1.01595	93.7675	1.21197	1	34.0344	25		3832	219.465	37.6716	1.0167	88.0238			78.8665	100
	312	339.795	55.2512	1.01439	45.1352	1.3841	1	38.8682	25		3576	76.5154	13.134	1.02132	39.3021			36.8371	25
	1336	288.879	46.9722	1.05098	189.236	1.16522	1	32.7216	25		4088	90.9974	15.6199	1.03528	291.648			55.1288	100
	824	175.939	28.608	1.01583	100.315	1.65359	1	46.436	25		4100	162.433	27.882	1.01792	49.8133			48.5892	75
	184	400.769	65.1657	1.03305	59.8434	1.48087	2	41.5857	50		2052	111.373	19.1174	1.03968	99.5502			86.1283	100
	1208	531.252	86.3824	1.02189	53.46	1.53923	2	43.2245	50		2564	101.632	17.4453	1.03665	65.8899			52.7056	25
	696	139.246	22.6416	1.01054	65.1768	1.0559	1	29.6517	25		3588	186.412	31.998	1.05339	190.11			43.5702	50
	440	34.8219	5.6621	1.0232	79.0086	1.11269	1	31.2465	25		3332	284.129	48.7713	1.02144	76.8497			62.1432	50
	952	211.858	34.4485	1.02928	132.757	1.23551	1	34.6955	25		772	42.3693	7.27278	1.02061	93.3178			46.0439	50
	1144	293.886	47.7863	1.01669	28.7088	1.27967	2	35.9356	50		2820	223.509	38.3658	1.05664	128.966			80.1506	75
	632	118.589	19.2828	1.0304	187.208	1.45026	1	40.7261	25		4228	80.9998	13.9038	1.04371	59.2326			48.8901	25
	888	496.295	80.6984	1.01476	45.6277	1.70894	3	47.9903	75		1156	339.248	58.2326	1.03521	72.3327			50.6372	75
	248	242.041	39.3563	1.02457	74.5122	1.00413	1	28.1979	25		3204	168.842	28.9821	1.02149	38.2805			48.6162	25
	1272	307.282	49.9646	1.00573	27.4815	1.30869	1	36.7505	25		2692	470.604	80.7801	1.03533	132.66			42.8476	25
	760	154.505	25.1228	1.02198	67.6919	1.2853	1	36.0937	25		3716	113.824	19.5381	1.02301	148.409			45.3648	25
	504	462.368	75.1818	1.0082	97.4142	1.44006	1	40.4397	25		1412	255.445	43.8476	1.03592	145.748			48.9547	50
	1016	234.2	38.0813	1.0114	79.9901	1.66197	2	46.6713	50		3972	150.392	25.8151	1.0513	81.0416			36.0037	25
	1028	525.067	85.3767	1.02797	208.588	1.41535	1	39.7457	25		4164	566.909	97.3111	1.04442	392.296			48.0628	75
	516	55.8489	9.08112	1.01607	70.9992	1.22863	2	34.5023	50		1092	116.724	20.0359	1.03302	116.887			59.3794	75
	260	250.214	40.6852	1.02352	188.883	1.18655	1	33.3206	25		1348	215.417	36.9768	1.02692	35.0114			55.5005	75
	1284	386.157	62.7898	1.01438	37.3396	2.119	2	59.5056	50		3396	385.635	66.195	1.03047	54.5828			57.1518	50
	772	346.771	56.3855	1.01839	115.631	1.52079	1	42.7067	25		4292	310.013	53.2144	1.01276	32.0137			57.6197	100
	644	459.036	74.64	1.04583	94.6256	1.61021	1	45.2178	25		1732	89.2577	15.3213	1.05759	55.0317			54.2536	50
	388	375.328	61.0289	1.02164	86.5231	1.59265	1	44.7247	25		3012	158.482	27.2038	1.02599	63.1941			35.784	50
	900	367.967	59.832	1.01687	34.7875	1.33348	2	37.4467	50		4036	125.647	21.5676	1.03093	94.3206			48.9547	50
	68	430.955	70.074	1.00986	37.5167	1.92859	1	54.1585	25		4132	147.724	25.3571	1.03039	77.838			65.314	50
	1092	334.921	54.4587	1.01566	60.6618	1.46049	1	41.0134	25		2852	123.51	21.2007	1.02294	31.7706			50.8168	50
	580	356.409	57.9527	1.01081	25.99	1.3893	3	39.0142	75		3876	270.816	46.4861	1.02312	38.898			45.067	50
	836	497.965	80.9699	1.03016	97.8933	1.4048	1	39.4495	25		4260	402.353	69.0647	1.06146	61.9064			42.3554	50
	196	371.613	60.4249	1.0215	54.2682	1.611	2	45.24	50		3492	370.105	63.5293	1.03351	49.2162			37.452	25
	1220	300.479	48.8584	1.0329	134.469	1.38674	1	38.9423	25		4196	221.417	38.0067	1.03618	529.217			43.3384	25
	708	142.167	23.1166	1.0212	85.2523	1.09686	1	30.8019	25		3684	164.333	28.2081	1.03169	194.714			45.2518	50
	452	51.4204	8.36104	1.03916	51.4301	0.93208	1	26.1746	25		356	303.488	52.0943	1.01332	26.3708			44.4816	25
	964	541.089	87.982	1.01784	45.2077	0.93208	1	26.1746	25		2916	368.959	63.3326	1.03918	192.824			54.2741	50
	36	384.1	62.4553	1.01285	65.5248	1.20549	1	33.8525	25		3940	333.879	57.311	1.00796	32.3494			58.331	100
	1060	536.937	87.3068	1.03597	219.695	1.48143	1	41.6014	25		4324	192.546	33.0509	1.00884	12.1645			58.4162	50
	548	83.5371	13.5833	1.02162	114.407	1.2128	1	34.0578	25		3812	240.616	41.3022	1.0179	44.6946			61.7305	75
	292	0	0	1.01728	185.038	1.2128	1	34.0578	25		1556	178.206	30.5894	1.02886	37.5536			61.9982	50
	1316	292.436	47.5506	1.0766	33.5529	1.2128	1	34.0578	25		3860	240.644	41.307	1.0394	93.5048			47.7055	25
	804	179.018	29.1086	1.04722	170.391	1.27784	1	35.8842	25		4244	534.932	91.8222	1.03815	180.331			45.6468	50
	164	402.174	65.3941	1.03134	94.0543	1.69805	1	47.6845	25		2452	449.5	77.1576	1.02721	76.3594			50.4488	75
	1188	290.349	47.2112	1.009	87.5222	1.17827	1	33.0881	25		3476	266.081	45.6733	1.03175	40.4713			44.9005	25
	676	474.867	77.2141	1.01899	43.1089	1.79416	1	50.3835	25		2964	347.16	59.5907	1.0174	60.1335			34.5974	25
	420	338.088	54.9737	1.01702	60.3604	1.43968	1	40.429	25		4180	493.595	84.7266	1.06052	316.054			50.5399	50
	932	207.142	33.6816	1.03975	73.5193	1.0528	1	29.5646	25		1108	433.533	74.4168	1.04484	45.6312			34.3374	25
	100	313.916	51.0433	1.02659	62.6918	1.12674	1	31.641	25		3156	221.579	38.0345	1.04392	236.558			42.3877	50
	1124	275.663	44.8233	1.02709	90.9721	1.15473	1	32.427	25		2644	405.466	69.5991	1.02173	150.832			48.4891	50
	612	99.8839	16.2413	1.02033	86.083	1.23764	1	34.7553	25		1620	285.045	48.9285	1.03105	96.8814			52.8933	50
	356	19.8137	3.22174	1.01286	158.476	1.48001	1	41.5615	25		2388	182.387	31.3071	1.04964	89.8604			41.5363	25
	868	184.658	30.0257	1.01089	39.3783	0.986843	1	27.7124	25		1364	378.203	64.9193	1.03968	79.5506			60.5149	50
	228	324.143	52.7062	1.02495	103.928	1.52264	1	42.7587	25		3924	28.6089	4.91078	1.01497	152.735			47.8488	75
	1252	313.58	50.9886	1.01046	115.665	1.70515	1	47.8839	25		4308	84.8589	14.5662	1.02278	12.2854			44.8722	50
	740	476.555	77.4886	1.03283	263.417	1.62338	1	45.5876	25		3284	305.369	52.4172	1.02183	121.844			52.3181	50
	484	59.0345	9.59911	1.03259	72.7653	1.08795	1	30.5517	25		2772	252.942	43.418	1.02665	66.0656			55.347	100
	996	231.798	37.6907	1.01509	47.3925	2.72113	4	76.4146	100		3796	59.092	10.1433	1.0313	68.8883			40.8138	50
	20	400.475	65.1179	1.01189	56.759	2.21788	1	62.2823	25		1492	191.048	32.7938	1.02531	112.268			57.6197	50
	1044	278.152	45.228	1.0233	42.1332	1.54828	2	43.4787	50		3028	216.796	37.2135	1.03869	63.0002			52.7775	50
	532	71.8799	11.6878	1.00683	62.5754	1.13099	1	31.7604	25		4052	277.966	47.7134	1.02864	60.015			61.6378	50
	276	0	0	1.02927	187.951	1.13099	1	31.7604	25		4148	281.74	48.3612	1.02159	48.6808			50.4696	25
	1300	183.443	29.8281	1.03013	77.9604	2.31624	4	65.0445	100		1076	450.439	77.3188	1.04202	237.385			39.3334	25
	788	480.29	78.0959	1.01435	23.0881	1.62713	2	45.6929	50		3124	273.703	46.9817	1.04437	351.48			45.0681	75
	148	417.143	67.8281	1.01548	46.0379	1.94962	2	54.7491	50		2612	451.21	77.4511	1.05841	146.964			50.3623	75
	1172	274.379	44.6145	1.02125	109.664	1.12503	1	31.593	25		3380	276.534	47.4676	1.0208	28.976			47.1994	75
	660	129.992	21.1369	1.02914	147.426	1.11443	1	31.2953	25		2868	177.227	30.4214	1.01479	45.2854			52.4289	50
	404	34.4507	5.60174	1.01087	84.6095	1.13414	1	31.8488	25		3892	364.321	62.5364	1.02058	68.8559			72.5561	50
	916	217.065	35.2951	1.03172	94.6914	2.30491	3	64.7263	75		4276	353.699	60.7131	1.0085	46.1931			43.1621	25
	84	333.801	54.2766	1.02933	81.8617	1.65508	2	46.4778	50		3252	445.156	76.4119	1.05696	809.428			58.1988	50
	1108	255.403	41.5289	1.01486	104.859	1.20878	1	33.9449	25		1716	12.7027	2.18044	1.02329	234.836			51.2719	75
	596	348.63	56.6878	1.03237	51.1505	1.2878	1	36.1639	25		3764	341.857	58.6804	1.01758	73.4965			52.7775	50
	340	423.589	68.8763	1.01009	49.2584	1.63752	2	45.9847	50		436	277.315	47.6017	1.03026	53.0224			80.2342	50
	1364	498.893	81.1208	1.05648	52.2665	1.42326	3	39.9679	75		4212	112.313	19.2788	1.0368	60.7984			57.6197	50
	852	185.067	30.0922	1.01135	85.9692	1.08325	1	30.4197	25		1140	222.555	38.202	1.03019	48.4156			64.6603	25
	212	415.667	67.5881	1.02402	45.0969	1.35448	2	38.0364	50		3700	247.96	42.5628	1.05777	129.174			47.4188	25
	1236	301.979	49.1023	1.01457	95.4865	1.31496	1	36.9266	25		4340	15.1907	2.60751	1.04483	122.067			31.1843	50
	724	153.077	24.8906	1.00948	120.534	1.1015	1	30.9322	25		3316	215.251	36.9483	1.02916	225.092			53.4315	25
	468	54.4114	8.84738	1.01765	63.6858	1.36585	1	38.3557	25		2804	0	0	1.044	237.441			47.0726	50
	980	220.863	35.9127	1.01282	87.7524	1.05551	1	29.6407	25		4084	72.6601	12.4723	1.02637	87.1945			45.0681	75
	52	518.589	84.3234	1.00955	74.5658	1.61553	1	45.3672	25		4108	213.91	36.7181	1.03093	153.815			58.4162	50
	564	360.12	58.5561	1.02983	87.1203	1.62725	1	45.6963	25		3084	328.02	56.3053	1.05058	127.789			48.9801	25
	308	434.901	70.7156	1.01459	36.98	1.62746	2	45.7022	50		2572	462.724	79.4275	1.041	78.8546			45.8796	25
	1332	386.515	62.848	1.05044	197.419	1.62746	2	45.7022	50		1548	235.058	40.3482	1.01482	38.3188			43.4174	25
	820	428.44	69.665	1.04309	59.3979	1.8953	2	53.2237	50		1292	327.738	56.2569	1.03439	63.6675			53.6299	75
	180	406.495	66.0967	1.03913	70.0681	1.32845	1	37.3054	25		3340	380.115	65.2475	1.0578	280.412			54.297	25
	1204	286.583	46.5989	1.02222	176.422	1.19672	1	33.6062	25		2828	430.518	73.8993	1.09261	218.446			41.9832	50
	692	140.574	22.8576	1.02604	183.825	1.16352	1	32.6739	25		1804	209.989	36.045	1.01869	28.533			53.7682	75
	436	341.904	55.5941	1.02253	96.0177	1.1776	1	33.0693	25		3852	237.902	40.8364	1.02735	123.211			53.5311	75
	948	500.936	81.453	1.00277	17.7279	1.70894	3	47.9903	75		4236	142.124	24.3959	1.029	267.165			38.3614	25
	116	416.769	67.7673	1.02219	60.3848	1.91585	2	53.8007	50		1932	257.549	44.2088	1.06816	124.233			55.0441	75
	1140	316.322	51.4345	1.02555	50.8932	1.66036	3	46.6261	75		76	278.708	47.8408	1.0035	24.4594			67.7898	75
	372	25.7067	4.17995	1.01192	52.0801	1.16091	1	32.6006	25		4172	537.384	92.243	1.04772	87.6657			53.7682	75
	884	193.63	31.4846	1.02077	91.6522	2.4624	4	69.1489	100		1100	161.081	27.6499	1.03853	89.2418			58.5715	50
	244	307.386	49.9815	1.01222	114.512	1.16202	1	32.6318	25		3660	86.4102	14.8325	1.02282	28.1047			51.9415	75
	1268	321.779	52.3218	1.02212	63.1595	1.43885	2	40.4057	50		2380	261.807	44.9397	1.01424	15.5287			53.7184	75
	756	151.485	24.6317	1.01643	72.6026	1.15232	1	32.3594	25		844	40.2942	6.91658	1.02415	186.346			55.1288	100
	500	66.376	10.7928	1.02659	139.783	1.29021	1	36.2316	25		4300	209.14	35.8993	1.00142	13.2199			43.4085	25
	1012	361.142	58.7223	1.03395	108.412	1.40654	1	39.4983	25		3276	117.943	20.2452	1.05023	121.29			57.9185	50
	12	410.533	66.7533	1.01158	37.8647	1.85349	2	52.0496	50		2764	164.455	28.229	1.00875	32.3231			51.3784	50
	1036	233.905	38.0333	1.03748	119.853	1.0982	1	30.8396	25		2508	77.2776	13.2649	1.02083	203.702			53.3766	25
	524	72.0415	11.7141	1.0485	149.388	1.29847	1	36.4635	25		3532	338.387	58.0848	1.00682	24.3597			42.6333	50
	268	417.046	67.8124	1.0476	80.5918	1.62887	1	45.7418	25		4044	173.559	29.7918	1.0347	122.397			49.561	50
	1292	300.103	48.7972	1.03434	44.1907	1.70939	2	48.003	50		4140	239.453	41.1026	1.05662	159.289			62.0557	75
	780	346.637	56.3637	1.05242	104.592	1.25145	1	35.1431	25		2604	401.77	68.9646	1.03277	103.955			45.8419	25
	140	434.278	70.6143	1.05193	76.5251	2.65061	1	74.4342	25		4268	394.381	67.6963	1.0115	30.7554			48.4358	75
	1164	527.494	85.7714	1.01578	26.2198	2.16265	2	60.7314	50		3244	343.783	59.011	1.01212	33.2373			37.5342	50
	652	111.782	18.1759	1.01509	89.2068	1.19176	1	33.4669	25		428	351.325	60.3056	1.0267	157.565			38.4494	25
	396	445.014	72.36	1.01255	69.3483	1.48104	1	41.5904	25		4204	88.9114	15.2618	1.03005	169.357			52.8437	75
	908	194.18	31.574	1.00907	51.3628	1.08343	1	30.4248	25		3180	352.349	60.4814	1.03268	98.1672			86.1283	100
	76	444.055	72.2041	1.11123	76.2415	1.90028	2	53.3635	50		2668	346.745	59.5195	1.02971	164.633			59.7842	50
	1100	555.954	90.399	1.0185	84.3056	1.36003	1	38.1923	25		3692	197.247	33.8578	1.02143	163.411			49.1939	25
	588	347.501	56.5042	1.00931	61.9776	1.4192	2	39.8539	50		3436	250.751	43.0419	1.01514	50.1694			58.4313	50
	332	419.755	68.2528	1.0135	26.7956	1.683	2	47.2619	50		1900	95.7214	16.4308	1.02493	60.055			61.5139	75
	1356	449.388	73.0712	1.09159	42.4454	1.75868	2	49.3871	50		4332	222.274	38.1538	1.03517	132.37			56.2317	25
	844	389.212	63.2865	1.01757	52.0718	1.75616	1	49.3163	25		2796	397.655	68.2583	1.05897	139.505			42.3189	25
	204	417.21	67.839	1.01504	54.0806	1.63752	2	45.9847	50		3820	308.57	52.9667	1.02225	51.4907			59.4441	75
	1228	458.733	74.5907	1.08918	57.6799	1.63752	2	45.9847	50		2540	142.406	24.4443	1.01925	36.5187			37.7038	75
	716	383.621	62.3774	1.02604	35.1716	1.62135	3	45.5306	75		3564	243.511	41.7992	1.05685	188.677			43.0712	25
	460	44.2079	7.18828	1.01675	61.0885	1.14302	1	32.0982	25		2332	501.213	86.0342	1.02048	77.178			55.405	50
	972	221.031	35.94	1.01011	91.2651	2.72113	4	76.4146	100		3868	201.998	34.6734	1.02338	41.6091			47.6652	50
	44	387.701	63.0408	1.01949	107.862	1.28341	1	36.0406	25		4252	440.133	75.5497	1.01686	34.1939			47.7209	25
	1068	246.82	40.1333	1.03	106.062	1.17094	1	32.8822	25		3228	244.647	41.9942	1.03843	291.97			44.5593	25
	556	463.462	75.3597	1.01997	91.6672	1.87159	1	52.5578	25		2716	134.539	23.0939	1.03294	54.1107			34.38	50
	300	350.029	56.9153	1.04647	101.158	1.35866	1	38.1538	25		1692	154.181	26.4655	1.02324	74.4458			42.4426	25
	1324	563.75	91.6667	1.04917	166.044	1.33526	1	37.4967	25		3740	147.554	25.3279	1.02163	245.604			42.2953	50
	812	176.465	28.6935	1.01645	224.114	1.42308	1	39.9628	25		2460	501.05	86.0062	1.05845	313.718			37.5342	50
	172	577.674	93.9307	1.02746	64.8102	1.57495	1	44.2276	25		3996	248.951	42.7329	1.04076	91.9814			46.838	25
	1196	355.864	57.8641	1.01855	43.499	2.42009	2	67.9608	50		4188	314.559	53.9947	1.0267	208.303			48.4358	75
	684	136.26	22.1561	1.0338	120.073	1.11708	1	31.3698	25		2908	340.439	58.437	1.03142	164.833			40.2043	25
	428	342.053	55.6184	1.03665	102.281	1.23887	1	34.7898	25		220	355.174	60.9663	1.03009	183.658			41.5446	75
	940	210.341	34.2018	1.01065	98.7306	2.39579	2	67.2784	50		4316	361.886	62.1185	1.02249	179.832			41.4914	25
	108	328.58	53.4276	1.05727	105.915	1.30998	1	36.7868	25		3292	347.985	59.7323	1.03932	80.5354			45.5218	50
	1132	338.724	55.0771	1.02476	72.8721	2.13463	1	59.9445	25		3804	188.747	32.3988	1.01858	122.969			31.2985	25
	364	10.1079	1.64356	1.02264	147.857	1.71899	1	48.2725	25		3036	318.8	54.7227	1.03567	76.1091			41.7353	25
	876	388.251	63.1302	1.02945	42.0335	1.54118	2	43.2793	50		4156	440.178	75.5574	1.03943	469.71			55.1288	100
	236	313.198	50.9265	1.0161	89.8658	1.23312	1	34.6284	25		2620	45.2952	7.77501	1.0293	219.625			45.0609	50
	1260	377.796	61.4302	1.04002	136.782	2.10179	1	59.0223	25		3644	282.914	48.5628	1.02144	94.1295			48.5928	75
	748	157.943	25.6818	1.03058	77.8142	0.976667	1	27.4267	25		3388	15.343	2.63366	1.02529	172.001			50.2432	50
	492	466.37	75.8325	1.01301	160.766	1.88471	1	52.9263	25		828	465.102	79.8357	1.04527	186.194			46.2205	75
	1004	390.201	63.4473	1.01497	73.1323	1.72946	1	48.5666	25		1852	163.409	28.0495	1.02043	61.616			37.1738	50
	1052	549.826	89.4026	1.02203	82.6477	1.28401	1	36.0575	25		4284	344.727	59.1731	1.04269	57.7052			41.5446	75
	540	487.118	79.2062	1.06748	118.746	1.34442	1	37.7539	25		2236	131.863	22.6345	1.01142	43.2678			69.4659	75
	1308	82.1039	13.3502	1.05809	99.2969	2.51086	2	70.5098	50		3260	118.919	20.4127	1.0437	111.773			39.3154	25
	796	169.245	27.5195	1.03175	156.357	1.37982	1	38.748	25		3516	237.855	40.8283	1.01994	28.7657			39.4515	50
	156	438.225	71.2561	1.04132	102.344	1.57966	1	44.3599	25		956	412.084	70.735	1.03275	222.153			58.7239	25
	1180	337.625	54.8984	1.03103	80.6666	1.9597	3	55.0321	75		3004	319.158	54.7841	1.01666	39.5257			45.5293	25
	668	128.475	20.8902	1.01462	153.584	1.2553	1	35.2512	25		4220	73.0976	12.5474	1.02983	38.8817			52.1297	50
	412	22.3314	3.63112	1.0378	109.239	1.17927	1	33.1162	25		2428	478.997	82.2208	1.03254	70.2712			46.0788	50
	924	531.993	86.5029	1.03338	50.2027	1.17927	1	33.1162	25		892	460.295	79.0106	1.03322	194.987			88.8156	75
	92	325.335	52.9	1.02056	74.6522	1.52701	1	42.8814	25		4348	42.9841	7.37831	1.03966	67.9728			54.8788	50
	1116	387.478	63.0046	1.02337	27.7178	1.80212	3	50.607	75		1276	420.367	72.1568	1.06083	119.028			45.5932	25
	604	458.62	74.5724	1.01329	75.3804	1.73208	1	48.6401	25		3324	299.568	51.4215	1.06571	485.571			37.6348	50
	348	405.04	65.8602	1.00393	38.0147	1.80919	3	50.8055	75		3836	142.996	24.5456	1.02118	42.2881			47.8003	50
	860	406.256	66.0579	1.00983	50.9589	2.23501	3	62.7634	75		3580	290.044	49.7866	1.00346	27.9831			38.6774	25
	220	405.195	65.8854	1.04375	159.809	1.28575	1	36.1063	25		4098	104.38	17.917	1.03897	118.049			80.1506	75
	1244	368.892	59.9824	1.01231	33.1907	1.78556	2	50.142	50		2562	196.218	33.6812	1.03625	80.1708			48.5928	75
	732	476.09	77.413	1.02659	60.2667	1.79239	1	50.3338	25		3586	329.569	56.5712	1.05241	177.694			50.3695	50
	476	54.5234	8.86559	1.01151	33.6179	0.804028	1	22.5787	25		2306	504.694	86.6317	1.00869	55.3858			42.5191	50
	988	414.266	67.3603	1.00835	61.445	1.59818	1	44.88	25		3330	276.313	47.4297	1.02721	78.978			56.9403	75
	60	451.114	73.3519	1.03455	70.9639	1.64001	2	46.0546	50		2818	312.564	53.6522	1.04318	228.016			60.1646	50
	1084	257.941	41.9416	1.02695	208.852	1.62966	1	45.764	25		4226	88.3445	15.1645	1.02393	55.5469			67.4536	25
	572	94.4778	15.3622	1.01963	59.8959	1.05246	1	29.5551	25		2178	117.657	20.1961	1.02929	124.1			45.2854	50
	316	0	0	1.02352	83.7611	1.05246	1	29.5551	25		1410	0	0	1.01847	91.4553			41.2353	25
	1340	154.048	25.0485	1.02066	96.6826	1.14103	1	32.0423	25		3138	403.748	69.3042	1.00458	29.3557			47.4638	75
	828	178.055	28.952	1.0151	81.176	1.39946	1	39.2995	25		7234	295.394	50.705	1.03886	36.4571			50.7817	100
	188	567.154	92.2202	1.01887	276.33	1.36973	1	38.4646	25		3650	359.161	61.6507	1.03663	119.558			52.7177	75
	1212	354.37	57.6211	1.0166	55.4165	1.95779	2	54.9785	50		2370	129.245	22.1852	1.05605	82.4293			56.466	75
	700	125.627	20.4272	1.01774	30.241	0.80762	2	22.6795	50		3394	86.387	14.8285	1.02716	100.757			48.9193	50
	444	44.4846	7.23327	1.01192	35.115	0.898318	1	25.2265	25		2754	249.097	42.758	1.02041	115.624			48.9866	75
	956	229.669	37.3446	1.03877	183.929	2.30491	3	64.7263	75		2498	432.661	74.2671	1.07485	571.272			75.5794	25
	124	396.361	64.4489	1.02914	73.8913	1.2914	1	36.265	25		3522	278.025	47.7236	1.03458	60.1866			47.715	75
	1148	279.804	45.4966	1.02746	94.2157	1.15305	1	32.3799	25		4130	141.795	24.3394	1.01511	34.3797			46.9474	25
	636	468.126	76.118	1.00759	109.174	1.69699	1	47.6547	25		2594	191.936	32.9462	1.0123	52.0936			40.916	25
	380	25.0398	4.07151	1.02045	58.5125	1.53382	1	43.0726	25		3874	250.975	43.0804	1.02519	112.228			48.8377	75
	892	195.305	31.7569	1.01903	164.909	1.17767	1	33.0712	25		4258	392.997	67.4587	1.04044	39.5119			58.3179	75
	252	440.108	71.5623	1.0227	69.2186	1.30916	1	36.7637	25		674	160.694	27.5834	1.01477	22.384			41.6185	25
	1276	299.668	48.7265	1.00901	53.3197	1.11863	1	31.4133	25		2722	430.929	73.9698	1.00512	41.7332			52.7523	25
	764	157.645	25.6333	1.01361	181.411	1.34345	1	37.7267	25		3746	207.944	35.694	1.03188	31.1293			57.3292	50
	508	73.0993	11.8861	1.05014	195.173	1.0941	1	30.7244	25		3490	349.566	60.0037	1.03186	65.0469			60.0455	75
	1020	228.408	37.1395	1.0133	71.0339	1.28386	1	36.0533	25		4194	269.53	46.2654	1.02784	192.831			50.4408	75
	2	387.487	63.006	1.01803	139.064	2.07264	1	58.2037	25		3170	304.613	52.2874	1.04393	73.668			59.2868	75
	1026	228.498	37.1541	1.02758	148.222	1.22508	1	34.4026	25		3682	130.483	22.3977	1.05059	44.2491			41.3287	25
	514	448.443	72.9176	1.01272	94.4717	1.77935	1	49.9676	25		2402	505.388	86.7509	1.07949	274.388			37.8925	25
	258	437.282	71.1028	1.01443	57.9065	1.2939	1	36.3352	25		3426	258.071	44.2984	1.02956	80.0891			44.8722	50
	1282	313.381	50.9563	1.02216	91.1664	1.33891	1	37.5992	25		4322	474.522	81.4527	1.04285	44.0485			58.5653	75
	770	379.431	61.6961	1.04833	59.366	1.40031	2	39.3234	50		3810	229.575	39.407	1.03083	52.4933			33.0081	50
	130	457.967	74.4662	1.06526	65.2205	1.58989	2	44.6472	50		2530	110.666	18.996	1.00952	19.8564			39.2256	25
	1154	270.341	43.9579	1.03578	175.649	1.29006	1	36.2274	25		4114	267.319	45.8858	1.02144	79.0973			52.5239	75
	642	117.343	19.0802	1.01375	112.722	1.28621	1	36.1192	25		3090	369.576	63.4385	1.05009	107.161			50.899	25
	386	461.573	75.0525	1.02672	132.477	1.55164	1	43.573	25		2322	0	0	1.02826	222.433			42.6333	50
	898	370.906	60.3099	1.01251	68.4797	1.84622	1	51.8454	25		1298	311.846	53.529	1.02274	71.0928			37.7575	25
	66	332.801	54.114	1.03667	61.7308	1.50189	1	42.176	25		2834	109.475	18.7916	1.01988	37.1835			52.5239	75
	1090	341.226	55.4839	1.01369	45.3266	1.50189	1	42.176	25		4242	524.423	90.0183	1.02109	42.4841			34.0653	25
	578	349.723	56.8655	1.04251	29.1473	1.3893	3	39.0142	75		2450	415.268	71.2816	1.03958	421.115			50.3035	50
	322	334.876	54.4514	1.01996	92.5103	1.13213	1	31.7924	25		3986	175.816	30.1792	1.01113	29.2639			55.9671	25
	834	391.688	63.6891	1.01972	63.6721	2.02913	1	56.9819	25		4178	508.269	87.2454	1.01565	66.4402			48.7617	50
	194	330.9	53.8049	1.03959	60.1666	1.25183	2	35.1538	50		2642	390.811	67.0835	1.04014	129.642			47.1994	75
	1218	312.015	50.7341	1.03165	177.293	1.33247	1	37.4183	25		2898	292.89	50.2752	1.04227	223.146			51.2311	25
	706	137.415	22.3439	1.01604	41.9799	1.23615	1	34.7135	25		3922	177.249	30.4251	1.02929	56.0059			48.849	75
	450	46.2543	7.52102	1.02862	90.8103	1.20234	1	33.764	25		4306	139.788	23.9949	1.04957	171.765			61.9982	50
	962	218.125	35.4675	1.01537	141.38	1.13419	1	31.8502	25		3538	160.979	27.6324	1.06671	63.768			44.0696	25
	34	387.968	63.0842	1.01836	55.6176	1.68587	1	47.3425	25		4146	269.377	46.2391	1.03894	143.116			57.9375	50
	1058	292.575	47.5732	1.02812	80.5574	1.83557	2	51.5463	50		3378	264.745	45.444	1.00693	15.2903			46.1383	25
	546	387.181	62.9563	1.00928	26.1149	1.54088	2	43.2709	50		2866	169.34	29.0676	1.05925	120.707			50.8964	25
	290	0	0	1.02324	189.692	1.54088	2	43.2709	50		3890	352.344	60.4806	1.09273	245.788			81.3636	50
	1314	263.264	42.8072	1.00766	46.6903	1.54088	2	43.2709	50		4274	365.287	62.7022	1.01668	31.0674			46.3616	50
	802	169.568	27.572	1.01908	124.564	1.1658	1	32.7379	25		2226	246.927	42.3855	1.02895	54.9495			62.0382	75
	162	448.312	72.8963	1.01079	331.796	1.26953	1	35.6508	25		3250	410.202	70.412	1.04433	51.3195			51.9043	25
	1186	303.823	49.4021	1.02533	78.5061	1.32015	1	37.0723	25		690	152.429	26.1647	1.01429	54.5428			34.3916	50
	674	119.259	19.3917	1.00608	50.1427	0.977145	1	27.4401	25		434	232.309	39.8763	1.02239	93.7662			54.4194	50
	418	44.2167	7.18971	1.00566	82.679	1.00608	1	28.2527	25		2994	78.9134	13.5456	1.01422	78.8769			61.4243	50
	930	206.12	33.5154	1.01224	222.437	1.50413	1	42.2389	25		4210	117.866	20.2319	1.04426	88.8846			55.782	25
	98	535.651	87.0977	1.03542	72.2994	1.39074	1	39.0547	25		1138	192.061	32.9677	1.03813	70.5696			49.7132	25
	1122	298.05	48.4634	1.04818	76.8594	2.31984	1	65.1456	25		3698	187.238	32.1398	1.06078	105.295			53.0578	75
	610	100.307	16.3101	1.02275	44.1999	1.06627	1	29.9429	25		3442	393.191	67.492	1.03576	118.769			45.0681	75
	354	429.657	69.8629	1.02942	132.018	1.85378	1	52.0577	25		4338	567.59	97.428	1.02945	130.609			50.8351	50
	866	525.966	85.5229	1.05268	189.545	1.60583	1	45.0948	25		3570	229.445	39.3847	1.01639	71.2801			46.5126	50
	226	331.626	53.9229	1.02594	76.2427	1.67233	1	46.9622	25		4082	34.8208	5.97706	1.03951	153.262			50.5453	25
	1250	327.331	53.2246	1.00988	85.8157	1.28987	1	36.222	25		2058	248.16	42.5972	1.03961	123.606			40.5318	50
	738	471.115	76.6041	1.01566	80.3759	1.57764	2	44.3032	50		3082	306.963	52.6908	1.05121	173.746			35.8969	25
	482	479.667	77.9946	1.02285	32.4044	1.78555	1	50.1417	25		522	200.529	34.4212	1.02602	68.5826			51.0057	75
	994	507.668	82.5476	1.02443	87.5629	1.72731	1	48.5062	25		2570	460.385	79.026	1.00933	25.1097			41.4414	25
	18	408.202	66.3743	1.0154	78.2703	2.35288	1	66.0734	25		3594	378.592	64.9861	1.01646	43.4456			42.9737	25
	1042	297.595	48.3894	1.05672	42.0173	1.83557	2	51.5463	50		3338	365.042	62.6602	1.03194	81.5756			45.2749	50
	530	73.2758	11.9148	1.02792	101.561	1.36297	1	38.2748	25		2826	375.54	64.4622	1.05228	159.18			60.0524	75
	274	415.445	67.552	1.01942	85.6904	1.41634	2	39.7735	50		4234	13.3989	2.29995	1.04846	135.719			60.7541	50
	1298	204.505	33.2528	1.06947	97.097	2.31624	4	65.0445	100		1162	441.37	75.762	1.05109	63.2062			39.6167	50
	786	166.253	27.033	1.03154	74.1332	1.27021	1	35.6699	25		1418	228.849	39.2824	1.02084	63.18			53.7341	50
	146	425.773	69.2314	1.00977	72.5559	1.89082	1	53.0979	25		2954	262.447	45.0496	1.02518	319.045			35.4	25
	1170	278.119	45.2226	1.01602	137.191	1.29105	1	36.2552	25		4170	549.647	94.348	1.09105	257.636			55.405	50
	658	126.655	20.5943	1.01732	131.205	1.07004	1	30.0488	25		330	168.095	28.8538	1.03218	45.254			65.0068	25
	402	32.8493	5.34135	1.01525	105.482	1.11627	1	31.347	25		4298	249.748	42.8697	1.05696	60.0335			34.7863	50
	914	213.749	34.7559	1.12447	58.0904	1.11627	1	31.347	25		3274	106.91	18.3513	1.02308	48.2819			53.5311	75
	82	339.786	55.2498	1.01537	51.7398	1.65508	2	46.4778	50		2762	457.995	78.6158	1.04246	109.041			37.8445	25
	1106	261.04	42.4455	1.02518	200.601	1.1872	1	33.3389	25		3530	321.565	55.1973	1.01616	51.965			53.2161	50
	594	477.558	77.6517	1.01385	218.78	1.57255	1	44.1602	25		4138	201.104	34.5199	1.00922	54.4647			50.4547	75
	338	15.669	2.5478	1.01231	265.323	2.68583	1	75.4233	25		3626	152.979	26.2592	1.02954	242.512			64.0184	50
	850	482.952	78.5288	1.01796	67.6662	1.49914	1	42.0987	25		2858	138.254	23.7316	1.02247	90.0837			46.6748	25
	210	422.185	68.648	1.01404	40.7996	1.35448	2	38.0364	50		4266	386.8	66.395	1.09107	110.166			48.511	25
	1234	310.742	50.5272	1.01023	133.168	1.23212	1	34.6003	25		4202	111.743	19.1809	1.02779	111.534			43.498	50
	722	137.161	22.3026	1.02819	44.3983	1.19187	2	33.47	50		2410	271.86	46.6653	1.05361	112.335			39.4119	25
	466	55.6549	9.04958	1.01527	101.948	1.1964	1	33.5972	25		4330	490.447	84.1862	1.04783	234.475			37.9918	50
	978	222.547	36.1865	1.02061	104.004	1.16726	1	32.7789	25		1258	150.521	25.8372	1.03597	74.4998			56.4332	75
	50	515.639	83.8437	1.01137	41.3686	1.73615	2	48.7544	50		3818	148.246	25.4467	1.03208	35.652			56.166	50
	1074	315.54	51.3073	1.01209	37.3944	1.70731	2	47.9445	50		1514	199.454	34.2367	1.04771	120.26			44.4882	75
	562	92.1786	14.9884	1.01442	94.5714	1.0466	1	29.3905	25		3562	195.585	33.5726	1.03889	578.161			48.6929	50
	306	434.441	70.6408	1.01446	63.2533	1.89978	1	53.3495	25		4122	340.197	58.3955	1.04082	499.257			41.0923	25
	1330	421.235	68.4935	1.05224	244.937	1.38865	1	38.996	25		2330	77.4309	13.2912	1.02649	228.402			57.9734	50
	818	405.002	65.854	1.00732	48.937	1.6679	2	46.8378	50		3866	179.484	30.8088	1.04029	206.121			33.1357	25
	178	407.779	66.3055	1.0168	79.8594	1.46044	1	41.012	25		4250	513.803	88.1953	1.00104	30.0646			45.5449	25
	1202	291.786	47.4449	1.01527	222.381	1.44336	1	40.5323	25		2714	226.99	38.9633	1.01716	55.8976			33.5243	25
	690	130.338	21.1932	1.00852	44.3384	1.02413	1	28.7595	25		2970	384.446	65.9909	1.0287	46.4975			38.1396	50
	434	51.5521	8.38246	1.01093	134.572	1.00038	1	28.0926	25		1946	177.107	30.4008	1.05018	80.6588			42.7745	75
	946	202.596	32.9424	1.01501	51.5638	0.981192	1	27.5538	25		3994	223.425	38.3514	1.01162	63.5068			62.0557	75
	114	324.79	52.8114	1.01169	182.997	1.21704	1	34.1768	25		4186	367.167	63.025	1.03572	150.528			51.2152	75
	1138	328.56	53.4244	1.02114	52.0686	1.71293	2	48.1024	50		3162	225.017	38.6246	1.03837	58.1008			75.3671	50
	626	101.122	16.4426	1.01332	49.7003	1.15049	2	32.308	50		602	234.455	40.2447	1.04534	127.96			45.3622	25
	370	28.5565	4.64333	1.01828	222.718	1.47163	1	41.3262	25		2394	474.171	81.3924	1.04586	182.226			54.6684	25
	882	376.608	61.2371	1.02383	41.138	1.63774	2	45.9909	50		3418	205.896	35.3425	1.02565	142.85			45.5218	50
	242	307.175	49.9472	1.02023	94.9469	1.2604	1	35.3945	25		3930	240.825	41.3381	1.01985	48.6996			50.3035	50
	1266	348.262	56.628	1.01634	113.666	1.55948	1	43.7932	25		4314	419.244	71.9641	1.02999	81.0241			46.673	50
	754	150.474	24.4673	1.03367	92.807	1.38628	1	38.9294	25		3290	339.827	58.332	1.01041	28.2229			52.8447	50
	498	59.98	9.75285	1.02331	88.3252	1.21988	1	34.2566	25		3802	87.3552	14.9947	1.00632	19.558			45.2847	50
	1010	372.389	60.5511	1.02994	101.292	1.46114	1	41.0316	25		3034	38.5272	6.61327	1.04108	199.926			52.5255	50
	10	380.985	61.9488	1.01665	47.7344	1.91519	2	53.7822	50		4154	371.362	63.745	1.02799	835.112			36.8435	25
	1034	508.03	82.6065	1.00393	18.2072	1.81666	2	51.0153	50		3130	316.52	54.3313	1.03231	118.821			58.1531	50
	522	69.2331	11.2574	1.0198	42.8839	0.810762	1	22.7678	25		3642	274.032	47.0381	1.01983	59.2479			80.1506	75
	266	419.716	68.2465	1.03116	51.7293	1.55213	1	43.5868	25		1338	153.838	26.4066	1.04577	46.5724			44.0735	25
	1290	109.942	17.8767	1.03948	74.6685	0.937016	1	26.3132	25		3386	313.609	53.8316	1.03201	88.7006			42.2139	50
	778	156.977	25.5247	1.01375	46.5764	1.04569	1	29.365	25		2874	202.463	34.7532	1.02645	66.4708			52.134	50
	138	444.135	72.2171	1.05856	19.2057	1.04686	1	29.3978	25		4282	350.817	60.2184	1.05074	86.9387			47.2484	25
	1162	296.893	48.2753	1.02374	91.2485	1.43896	1	40.4088	25		3258	176.093	30.2267	1.02143	88.2458			48.9283	50
	650	428.209	69.6275	1.01995	51.9968	1.73237	2	48.6483	50		2746	329.472	56.5545	1.05448	257.724			70.6142	75
	394	29.7281	4.83384	1.01613	50.0677	1.37215	1	38.5326	25		3770	223.964	38.4439	1.02545	49.2909			58.4647	75
	906	192.126	31.24	1.01297	55.1932	2.4624	4	69.1489	100		4218	82.7078	14.197	1.05545	82.7305			34.0009	25
	74	449.514	73.0917	1.02242	34.9946	1.90028	2	53.3635	50		3194	461.961	79.2965	1.04598	968.149			67.7898	75
	1098	314.54	51.1447	1.01034	30.0702	1.88384	3	52.9018	75		4346	0	0	1.03988	167.008			42.4585	50
	586	90.0937	14.6494	1.02175	90.0007	1.30061	1	36.5236	25		1274	348.819	59.8755	1.04493	27.5497			47.5613	25
	330	19.4575	3.16382	1.01438	317.366	1.72634	1	48.4789	25		1786	329.117	56.4936	1.02119	56.4237			69.4659	75
	1354	456.377	74.2076	1.04693	79.0712	1.72634	1	48.4789	25		3578	56.1589	9.63979	1.03404	261.463			53.3689	25
	842	187.509	30.4893	1.00841	72.1582	2.86888	4	80.5637	100		2042	284.522	48.8388	1.05146	119.549			48.0282	50
	202	345.074	56.1096	1.02921	47.7046	1.47425	2	41.3998	50		4090	65.9428	11.3192	1.02623	89.2861			34.5081	50
	1226	374.893	60.9582	1.02165	96.117	1.40831	1	39.548	25		4102	125.73	21.5818	1.05693	37.8852			46.9204	75
	714	390.824	63.5486	1.00612	42.1394	1.62135	3	45.5306	75		3078	287.201	49.2986	1.03457	144.92			56.1339	50
	458	440.08	71.5577	1.00917	52.1502	1.9397	1	54.4705	25		3590	81.3527	13.9644	1.01502	64.4049			36.6967	25
	970	333.22	54.1821	1.03368	73.4149	1.66844	2	46.853	50		2822	352.867	60.5703	1.03693	105.566			48.0628	75
	42	528.5	85.935	1.01181	126.993	1.6122	1	45.2737	25		1798	201.562	34.5985	1.03382	99.1141			51.2152	75
	1066	247.512	40.2459	1.01833	64.1117	1.3032	1	36.5964	25		4230	72.902	12.5138	1.0194	46.1462			61.5139	75
	554	77.1706	12.5481	1.01244	100.162	1.52752	1	42.8957	25		3718	141.69	24.3214	1.04077	95.0328			48.5718	50
	298	351.689	57.1852	1.01553	49.1862	1.34897	1	37.8817	25		1414	286.079	49.106	1.04261	41.9509			51.2719	75
	1322	586.832	95.4198	1.01747	71.202	1.67604	1	47.0664	25		3462	166.16	28.5217	1.04505	160.652			51.6731	25
	810	168.54	27.4049	1.01037	88.1389	1.35211	2	37.9698	50		3974	169.019	29.0125	1.0431	77.1823			47.8313	50
	170	576.087	93.6727	1.02466	112.615	1.41835	1	39.83	25		70	276.849	47.5217	1.02644	46.3651			46.6886	25
	1194	278.385	45.2659	1.07114	125.835	1.02509	1	28.7865	25		4166	551.175	94.6103	1.11137	357.163			37.9448	50
	682	135.346	22.0075	1.01928	139.383	1.114	1	31.2833	25		1094	130.455	22.3929	1.01436	33.1716			43.5702	50
	426	40.7017	6.61816	1.01925	68.0047	1.05145	1	29.5267	25		3654	83.483	14.33	1.02977	65.7564			69.952	25
	938	224.671	36.5319	1.02401	53.197	2.30491	3	64.7263	75		2374	146.215	25.0981	1.01904	51.8237			41.0972	50
	106	583.38	94.8585	1.02537	82.2239	1.31396	3	36.8985	75		3398	402.198	69.0381	1.01461	32.6078			45.9566	50
	1130	265.316	43.1408	1.03886	108.03	1.02749	1	28.8539	25		4294	340.166	58.3902	1.01901	19.9589			45.0609	50
	618	108.178	17.5899	1.01487	113.038	1.32598	1	37.2361	25		2246	516.981	88.7408	1.01971	49.7055			54.1943	50
	362	428.493	69.6737	1.04858	137.322	1.2882	1	36.1751	25		2502	465.666	79.9325	1.0551	122.576			47.9063	75
	874	388.672	63.1987	1.03094	32.2987	1.35986	2	38.1875	50		3526	301.012	51.6693	1.05565	124.177			45.8663	25
	234	314.273	51.1013	1.032	74.9717	1.28249	1	36.0148	25		4134	145.818	25.03	1.01554	60.4455			43.7996	25
	1258	295.85	48.1057	1.01611	61.2688	0.953836	1	26.7855	25		294	294.509	50.5531	1.04348	122.463			41.6803	25
	746	155.612	25.3028	1.02806	87.1154	1.20835	1	33.9328	25		3366	0	0	1.02318	102.475			48.5892	75
	490	50.8195	8.26333	1.00616	130.854	1.1595	1	32.561	25		166	485.016	83.254	1.04102	61.044			57.6197	100
	1002	227.33	36.9642	1.02667	136.07	1.35762	1	38.1246	25		4262	394.48	67.7133	1.02417	23.9771			32.1237	25
	26	395.22	64.2634	1.00876	75.8624	1.73406	1	48.6957	25		1190	342.501	58.791	1.02615	28.3274			58.331	100
	1050	243.781	39.6392	1.02253	164.232	1.37342	1	38.5683	25		3238	0	0	1.0312	124.193			43.1567	25
	538	414.641	67.4213	1.01042	38.4448	1.81152	3	50.871	75		2726	447.718	76.8517	1.08561	143.363			30.4279	25
	282	379.484	61.7047	1.00882	81.1221	2.07566	1	58.2885	25		3750	230.849	39.6257	1.05554	172.117			43.9451	25
	1306	145.033	23.5826	1.02977	51.187	2.07566	1	58.2885	25		4198	163.885	28.1312	1.03822	484.945			55.6675	50
	794	162.51	26.4244	1.02755	126.345	1.56561	1	43.9653	25		1126	334.663	57.4456	1.02658	179.217			42.295	50
	154	393.31	63.9528	1.01877	76.4868	1.32064	1	37.0861	25		3174	121.131	20.7924	1.03058	48.7803			43.4996	25
	1178	341.07	55.4585	1.02368	26.6295	1.9597	3	55.0321	75		3942	98.216	16.859	1.04592	48.8938			32.7435	50
	666	125.283	20.3712	1.03098	103.682	1.28219	1	36.0064	25		230	463.803	79.6127	1.02396	67.2235			59.7226	75
	410	568.532	92.4442	1.0162	87.0334	1.60928	2	45.1917	50		4326	186.441	32.003	1.06711	82.1184			47.4766	50
	922	200.399	32.5852	1.01161	78.1345	2.4624	4	69.1489	100		2534	404.825	69.489	1.03397	238.845			50.4488	75
	90	438.612	71.319	1.03604	100.807	1.78732	1	50.1914	25		3558	139.756	23.9894	1.03779	209.927			51.9415	75
	1114	406.053	66.0249	1.0139	21.9487	1.81455	2	50.956	50		3046	428.636	73.5762	1.0385	158.08			37.2218	25
	602	90.982	14.7938	1.02543	93.801	1.39286	1	39.1142	25		4118	292.515	50.2108	1.00521	25.0372			42.119	25
	346	25.1071	4.08246	1.02269	243.461	1.40595	1	39.4818	25		3606	73.2497	12.5735	1.01602	131.567			39.7561	25
	858	196.316	31.9213	1.02821	121.771	2.61683	4	73.4856	100		3862	163.733	28.1051	1.03998	184.293			44.2932	25
	218	325.976	53.0042	1.02763	56.4242	1.22783	1	34.4798	25		4246	536.78	92.1394	1.05428	176.588			54.3285	50
	1242	537.703	87.4314	1.00428	33.9233	1.53923	2	43.2245	50		2198	190.212	32.6503	1.01462	74.7687			50.574	75
	730	475.191	77.2668	1.02111	49.2039	1.78797	2	50.2096	50		3734	216.396	37.1448	1.034	44.0331			42.2758	25
	986	424.816	69.0758	1.01729	74.1849	1.55812	1	43.755	25		3478	266.988	45.829	1.02688	26.6527			60.5149	50
	58	436.851	71.0327	1.03126	119.568	1.78669	1	50.1737	25		3990	204.203	35.0519	1.02198	52.0764			58.4647	75
	1082	256.625	41.7276	1.00558	60.4644	1.0733	1	30.1403	25		4182	456.456	78.3516	1.05391	170.524			53.2161	50
	570	100.688	16.372	1.0238	139.58	1.45393	1	40.8291	25		3158	238.821	40.9941	1.03201	437.18			61.7305	75
	314	335.66	54.5789	1.01586	39.0038	1.25183	2	35.1538	50		2646	429.667	73.7532	1.03892	132.292			51.7093	25
	1338	229.5	37.3171	1.0423	151.416	1.1353	1	31.8814	25		2390	446.974	76.724	1.02049	338.788			39.6003	25
	826	394.266	64.1083	1.01655	100.555	1.54813	1	43.4745	25		1366	210.514	36.1352	1.01529	43.2023			42.7129	25
	1210	364.96	59.3431	1.02196	114.705	2.42127	1	67.9939	25		3414	142.056	24.3842	1.02546	29.0696			48.3985	50
	698	397.395	64.6171	1.00901	62.2484	2.37603	1	66.7235	25		2902	315.83	54.2129	1.03471	252.52			43.7372	25
	442	36.1459	5.87738	1.01965	40.8891	0.827126	1	23.2273	25		3926	38.5454	6.6164	1.02878	119.053			51.8096	50
	954	490.871	79.8164	1.03229	73.4763	1.43813	1	40.3855	25		4310	128.77	22.1036	1.02053	18.0555			40.7669	25
	122	405.655	65.9602	1.02008	87.9483	1.45033	1	40.7281	25		3286	153.768	26.3946	1.04344	86.9717			50.9033	25
	1146	564.441	91.779	1.01954	87.5518	1.45033	1	40.7281	25		3542	171.419	29.4244	1.06091	98.1624			47.9322	25
	634	475.588	77.3314	1.02371	88.8071	1.46132	1	41.0367	25		4150	295.809	50.7762	1.04249	161.232			55.0785	25
	378	389.325	63.3049	1.0036	48.9072	1.54088	2	43.2709	50		1078	484.451	83.157	1.0398	175.73			49.7306	25
	890	496.729	80.7689	1.01652	69.4439	1.70894	3	47.9903	75		3126	276.194	47.4093	1.04504	158.265			70.6142	75
	250	442.152	71.8946	1.03717	40.6791	1.46788	2	41.2209	50		3638	239.904	41.18	1.00715	42.7445			44.4651	75
	1274	304.061	49.4408	1.02544	89.5745	1.26752	1	35.5944	25		1334	348.009	59.7364	1.06281	128.28			42.3577	25
	762	513.203	83.4476	1.02626	152.466	1.56217	1	43.8687	25		3382	291.147	49.976	1.01973	37.77			48.511	50
	506	516.355	83.9602	1.04359	143.397	1.90658	1	53.5404	25		2870	376.647	64.6522	1.03001	63.7826			60.5537	50
	1018	224.114	36.4413	1.01555	32.5871	1.39992	1	39.3124	25		182	450.793	77.3795	1.02193	128.814			44.71	25
	6	384.603	62.5371	1.02054	136.979	1.6669	1	46.8098	25		4278	347.326	59.6192	1.04274	97.3769			46.0601	25
	1030	244.009	39.6763	1.05853	41.0152	1.6669	1	46.8098	25		2230	524.61	90.0504	1.02609	72.6019			59.6199	50
	518	64.4957	10.4871	1.02468	96.2857	1.34091	1	37.6553	25		3254	72.6717	12.4742	1.01934	107.777			51.4649	25
	262	388.557	63.18	1.01213	36.6783	2.119	2	59.5056	50		1718	64.2515	11.0289	1.05978	77.9838			50.1575	50
	1286	385.702	62.7158	1.01138	49.1744	1.80559	3	50.7044	75		2486	145.458	24.9682	1.00602	17.9202			61.8006	50
	774	147.358	23.9607	1.03538	50.2393	1.30888	2	36.7559	50		3510	63.0747	10.8269	1.01875	94.4338			51.5347	75
	134	452.66	73.6033	1.09971	44.0354	1.47371	1	41.3846	25		2998	14.6266	2.51069	1.03145	108.488			47.5497	50
	1158	362.76	58.9854	1.01961	52.6932	1.17043	2	32.8679	50		4214	118.968	20.4211	1.03546	91.6507			48.5892	75
	646	462.296	75.1701	1.03399	72.5424	1.23359	1	34.6416	25		2166	97.973	16.8173	1.02939	191.176			44.3296	50
	390	358.537	58.2987	1.03262	114.043	2.09667	1	58.8785	25		2678	375.282	64.4179	1.0363	199.303			40.3341	25
	902	362.039	58.8681	1.04428	82.075	1.58349	1	44.4674	25		3702	211.91	36.3748	1.05835	117.409			51.9079	25
	70	356.859	58.0259	1.00842	32.9741	1.50107	2	42.1529	50		3446	208.146	35.7287	1.02672	100.337			42.3312	25
	1094	329.549	53.5852	1.02267	22.6639	1.69694	3	47.6533	75		4342	0	0	1.05107	110.408			42.8936	25
	582	80.3557	13.066	1.0293	93.9646	1.28251	1	36.0153	25		3318	273.049	46.8694	1.02918	85.5338			37.2277	25
	326	469.799	76.3901	1.06754	33.845	1.28251	1	36.0153	25		2550	161.093	27.6519	1.03691	68.8742			44.5812	25
	1350	473.299	76.9592	1.01057	42.1361	1.58143	3	44.4096	75		3574	239.616	41.1306	1.00533	47.5148			53.7341	50
	838	187.015	30.4089	1.05977	122.809	0.98779	1	27.739	25		1014	483.988	83.0775	1.02291	52.2058			39.4515	50
	198	361.437	58.7702	1.01903	30.5921	1.50107	2	42.1529	50		2038	121.395	20.8377	1.02014	40.7403			39.3447	25
	710	395.553	64.3176	1.01431	105.775	1.83263	1	51.4638	25		3086	341.137	58.5569	1.04286	51.82			44.2727	50
	454	60.058	9.76553	1.02473	195.315	1.02482	1	28.7789	25		3342	415.316	71.2898	1.06936	220.17			47.715	75
	966	217.342	35.3402	1.04058	77.2146	1.17094	1	32.8822	25		2830	446.424	76.6296	1.08696	114.289			53.7184	75
	38	375.427	61.045	1.0187	110.048	1.40121	1	39.3487	25		3854	106.36	18.2569	1.0379	157.882			75.3671	50
	1062	273.259	44.4324	1.02646	65.9835	1.30087	1	36.5309	25		4238	119.274	20.4736	1.03244	250.132			63.1729	25
	550	371.65	60.4309	1.02469	72.0796	1.44231	1	40.5028	25		4174	528.858	90.7795	1.03864	101.922			58.5466	25
	294	368.646	59.9424	1.01105	79.5131	1.65832	1	46.5688	25		3662	98.5399	16.9146	1.02084	146.179			54.8788	50
	1318	320.955	52.1878	1.03711	55.1621	1.65832	1	46.5688	25		334	312.624	53.6625	1.06681	102.729			53.3678	50
	806	174.432	28.3629	1.01604	59.525	2.07892	2	58.3801	50		846	471.108	80.8666	1.04239	254.695			55.7635	50
	166	429.011	69.7579	1.02452	59.0107	1.29982	1	36.5014	25		2894	290.112	49.7983	1.03948	356.405			42.3156	25
	1190	280.658	45.6354	1.00944	71.5294	0.923989	1	25.9474	25		3918	127.31	21.853	1.03436	243.916			55.3295	50
	678	127.009	20.6519	1.01548	84.7541	1.24053	1	34.8365	25		4302	208.057	35.7134	1.0032	12.9674			39.1894	50
	422	27.5201	4.47481	1.01578	77.8485	1.07019	1	30.053	25		3278	126.527	21.7186	1.02107	40.2033			48.4358	75
	934	514.225	83.6138	1.03607	248.222	1.47995	1	41.5598	25		2510	48.4255	8.31233	1.03641	130.011			45.3039	75
	102	589.135	95.7943	1.02914	101.955	1.31396	3	36.8985	75		3534	345.854	59.3665	1.00977	43.7465			45.8576	75
	1126	268.299	43.6259	1.01818	106.866	1.08695	1	30.5236	25		4142	253.468	43.5083	1.05343	149.543			51.8548	50
	614	89.7012	14.5856	1.0069	45.8322	1.09228	1	30.6733	25		1070	203.021	34.849	1.013	39.8219			42.3554	50
	358	424.185	68.9732	1.01494	54.6494	1.41634	2	39.7735	50		3630	0	0	1.03159	135.682			90.8871	25
	870	190.686	31.0059	1.03183	114.867	1.12178	1	31.5017	25		302	302.129	51.8611	1.03565	64.4082			55.937	50
	230	546.786	88.9083	1.01769	43.1819	1.42041	2	39.8878	50		2350	482.286	82.7854	1.06408	425.555			59.7449	50
	1254	298.96	48.6114	1.02046	44.5909	1.04264	1	29.2793	25		2862	145.928	25.0488	1.05351	70.2775			51.6448	75
	742	146.556	23.8302	1.03152	58.8524	1.53468	1	43.0968	25		4270	378.775	65.0175	1.04506	22.9137			61.0308	25
	486	471.348	76.642	1.02106	82.618	1.28514	1	36.0892	25		3246	354.072	60.7772	1.02118	54.3571			64.8092	50
	998	226.56	36.839	1.01012	66.8513	1.66197	2	46.6713	50		3758	303.82	52.1513	1.04646	60.206			43.4097	25
	22	397.585	64.648	1.0325	93.1654	1.71922	1	48.279	25		4206	141.758	24.333	1.01553	40.6301			38.1307	50
	1046	250.558	40.7411	1.02772	74.1926	1.31561	1	36.9449	25		3182	365.564	62.7498	1.00451	15.6938			47.7153	25
	534	79.3296	12.8991	1.0141	78.3159	1.13061	1	31.7497	25		3438	374.824	64.3393	1.01148	29.4881			59.8917	25
	278	0	0	1.03533	156.936	1.30241	1	36.5742	25		1902	115.832	19.8828	1.02892	100.051			41.5877	25
	1302	134.782	21.9158	1.06795	90.7133	2.20143	1	61.8204	25		4334	17.3219	2.97334	1.0356	120.186			59.1169	75
	790	481.337	78.2662	1.01439	31.5426	1.61309	2	45.2987	50		3310	233.242	40.0365	1.0131	75.766			46.2205	75
	150	414.794	67.4462	1.01159	42.1386	1.63117	2	45.8064	50		3566	170.387	29.2473	1.05038	67.3017			48.4891	50
	1174	272.119	44.247	1.01908	113.545	1.1993	1	33.6786	25		4126	199.802	34.2964	1.07469	391.13			48.4843	75
	662	111.409	18.1153	1.01142	34.1365	1.14229	2	32.0777	50		3102	200.495	34.4154	1.02039	34.0848			46.5259	50
	406	437.866	71.1977	1.04337	71.8564	1.88594	2	52.9608	50		4254	439.48	75.4376	1.05229	268.797			46.1766	50
	918	357.451	58.1221	1.05127	83.8497	1.58729	1	44.5742	25		1694	239.547	41.1187	1.02488	68.9773			59.4441	75
	86	336.033	54.6395	1.04455	63.1993	1.47713	2	41.4806	50		2974	429.39	73.7057	1.00912	55.3285			48.0574	75
	1110	262.862	42.7418	1.01716	296.879	1.33114	1	37.381	25		3998	251.026	43.0891	1.04697	207.198			37.7413	50
	598	352.554	57.3259	1.02948	315.228	1.28719	1	36.1468	25		4190	310.305	53.2645	1.03169	253.312			51.3448	25
	342	14.1014	2.29291	1.01051	131.463	1.91871	1	53.8811	25		2398	218.741	37.5473	1.02807	38.8224			37.2678	25
	854	186.499	75.9205	1.02808	179.151	1.16472	1	32.7076	25		3422	240.026	41.2009	1.03606	83.0543			42.9616	50
	214	410.733	30.325	1.02593	64.5403	1.61962	1	45.482	25		3934	275.148	47.2297	1.03686	80.0185			53.7218	50
	1238	293.437	66.7859	1.01882	75.2613	1.10651	1	31.0729	25		4318	413.148	70.9177	1.00837	23.2758			43.8751	50
	726	486.645	47.7133	1.02755	144.373	1.57968	1	44.3604	25		1246	103.154	17.7066	1.03408	76.6063			71.7083	50
	470	61.9961	79.1293	1.02601	104.428	1.09894	1	30.8603	25		3294	374.355	64.2588	1.03464	53.8195			42.7745	75
	982	223.911	10.0807	1.03822	163.681	1.18299	1	33.2206	25		3806	201.251	34.5451	1.01885	46.8528			88.8156	75
	1078	280.54	36.4083	1.03278	63.0121	1.62417	1	45.6098	25		4062	317.095	54.43	1.03713	80.9885			67.7898	75
	566	84.5764	45.6163	1.02087	30.6249	1.05286	1	29.5663	25		2110	15.8747	2.72492	1.02172	86.4849			40.7415	50
	310	431.549	13.7523	1.02035	51.9058	1.57126	2	44.124	50		3646	292.302	50.1742	1.04464	198.019			37.8142	25
	1334	353.402	70.1706	1.09457	134.327	1.25152	1	35.1451	25		2878	450.29	77.2932	1.03619	92.0022			74.9967	25
	822	178.48	57.4637	1.01681	78.5925	2.5476	2	71.5415	50		4286	332.858	57.1357	1.0267	30.4611			37.6348	50
	182	403.499	29.0211	1.03322	51.4309	1.48087	2	41.5857	50		2494	15.5578	2.67053	1.03328	181.164			70.6676	50
	1206	534.309	65.6096	1.02053	53.7789	1.42053	2	39.8912	50		3518	245.922	42.213	1.01818	57.5348			36.7955	25
	694	141.955	86.8795	1.03107	96.0707	1.04952	1	29.4725	25		4222	107.039	18.3735	1.03825	86.7888			44.4651	75
	438	36.1041	23.0821	1.01655	82.176	1.29521	1	36.372	25		2686	418.207	71.7861	1.0216	27.4196			50.8546	25
	950	502.519	5.87059	1.01476	109.043	2.06424	1	57.9678	25		4350	56.511	9.70023	1.04824	52.8802			47.5934	25
	118	612.052	81.7104	1.03727	62.1865	2.06424	1	57.9678	25		2302	111.741	19.1806	1.05812	82.5684			46.2205	75
	1142	305.235	99.5207	1.01268	36.6188	2.06951	2	58.1158	50		4094	75.1568	12.9008	1.03552	49.7692			31.4666	25
	630	112.217	49.6317	1.02198	122.356	1.08448	1	30.4543	25		4097	135.637	23.2824	1.04767	254.754			47.9063	75
	374	35.5634	18.2467	1.01911	263.204	1.15447	1	32.4197	25		2561	390.242	66.9858	1.04026	357.46			42.5191	50
	886	189.524	5.78267	1.01649	64.7661	1.22995	1	34.5394	25		257	438.041	75.1906	1.01368	28.7909			61.9605	25
	246	507.558	30.8169	1.02397	94.8299	2.01554	1	56.6002	25		2305	498.595	85.5848	1.01209	26.1371			57.611	50
	1270	311.988	82.5298	1.01041	66.6865	1.51266	1	42.4784	25		4225	98.9566	16.9861	1.05831	110.169			48.0877	75
	758	522.694	50.7298	1.0171	32.3574	1.51266	1	42.4784	25		2177	546.628	93.8298	1.06095	200.906			56.2409	50
	502	67.1684	84.9909	1.02786	117.754	1.29115	1	36.258	25		3201	143.179	24.577	1.03833	53.4067			43.2214	50
	1014	240.207	10.9217	1.02594	92.503	1.29115	1	36.258	25		2689	435.256	74.7126	1.02688	112.675			49.3559	25
	14	366.315	39.058	1.00797	36.0449	1.69595	2	47.6255	50		3713	384.237	65.9551	1.04795	441.125			37.9551	25
	1038	508.818	59.5634	1.03543	197.283	1.804	1	50.6598	25		1409	234.895	40.3202	1.01113	27.0512			53.7218	50
	526	71.8495	82.7346	1.0214	103.813	1.23723	1	34.7438	25		4161	525.796	90.2539	1.0109	45.0314			50.7024	50
	270	419.01	11.6828	1.06635	70.9849	1.63867	1	46.017	25		1089	451.474	77.4964	1.00376	29.6857			47.2099	25
	1294	458.993	68.1317	1.01138	21.7016	1.66538	3	46.7671	75		7233	296.077	50.8222	1.01397	25.4369			48.9193	50
	782	169.515	74.633	1.01476	54.6628	1.00359	1	28.1827	25		3649	346.984	59.5605	1.05751	106.687			55.3295	50
	142	428.729	27.5634	1.02471	102.212	1.86011	1	52.2355	25		3393	365.147	62.6782	1.04128	35.5052			53.144	50
	1166	293.05	69.712	1.01571	138.335	1.30079	1	36.5287	25		2881	229.796	39.4449	1.03394	99.0821			49.878	25
	654	117.482	47.6504	1.01761	89.8628	1.55059	1	43.5435	25		4289	318.103	54.603	1.02494	40.4434			57.9185	50
	398	33.0166	19.1028	1.00445	37.7803	1.05098	1	29.5135	25		2753	369.525	63.4297	1.04091	54.5647			44.5244	75
	910	196.158	5.36855	1.01703	73.1481	1.07362	1	30.1493	25		4129	169.501	29.0952	1.06612	128.26			57.0831	50
	78	344.217	31.8956	1.02193	100.552	1.51108	1	42.434	25		2593	369.64	63.4495	1.02619	259.367			33.0027	25
	1102	285.822	55.9702	1.01587	67.5396	1.26545	1	35.5363	25		2337	27.5672	4.73197	1.05128	181.956			42.295	50
	590	99.9187	46.4751	1.01421	125.828	1.10757	1	31.1027	25		2849	114.207	19.6039	1.01866	99.1995			39.5282	50
	846	188.383	16.2469	1.02255	98.0178	2.459	2	69.0534	50		3873	237.537	40.7737	1.05492	134.025			56.7568	75
	206	430.316	33.5047	1.03232	51.1848	1.73037	1	48.5921	25		4257	396.923	68.1326	1.00615	13.6789			55.2695	50
	1230	354.384	30.6314	1.01479	64.094	1.66781	1	46.8353	25		2721	150.531	25.8389	1.06044	36.546			57.3292	50
	462	47.1038	69.9701	1.01172	48.4887	1.09336	1	30.7036	25		1697	311.784	53.5184	1.02881	121.344			55.5005	75
	974	212.657	57.6234	1.009	62.8995	1.09336	1	30.7036	25		3745	200.664	34.4444	1.03672	129.83			33.9907	50
	46	373.906	7.65915	1.03215	197.129	1.19326	1	33.509	25		3489	339.83	58.3325	1.0547	67.6259			71.6342	75
	1070	521.789	34.5784	1.01428	22.6793	1.60726	3	45.1349	75		2977	56.0373	9.61892	1.03069	84.7789			61.8006	50
	558	81.1898	60.7977	1.00942	32.8631	0.958236	1	26.9091	25		1953	53.9274	9.25675	1.05403	97.4116			45.2854	50
	302	0	84.8437	1.02356	249.624	1.92076	2	53.9386	50		4193	286.27	49.1388	1.03675	165.107			58.5653	75
	1326	544.938	13.2016	1.02482	121.009	1.26284	1	35.463	25		2145	63.3796	10.8792	1.01678	85.4661			49.8774	50
	814	172.162	0	1.03757	108.108	1.18326	1	33.2282	25		3681	137.033	23.522	1.03883	131.585			51.2152	75
	174	419.705	88.6078	1.0417	65.1551	1.66931	2	46.8774	50		3425	202.472	34.7547	1.01952	38.0463			39.7828	50
	1198	340.971	27.9938	1.01646	55.6595	1.79476	1	50.4003	25		3937	309.275	53.0877	1.0321	52.752			45.6088	50
	686	423.168	68.2447	1.0085	90.6016	1.75627	2	49.3194	50		4321	473.525	81.2815	1.01025	30.2922			43.217	25
	430	40.5036	55.4424	1.01154	46.5993	0.78422	1	22.0224	25		3297	393.291	67.5092	1.02649	101.723			56.7568	75
	942	205.377	68.8078	1.01389	107.922	2.76457	2	77.6344	50		3809	214.425	36.8065	1.0015	23.5935			51.6448	75
	110	571.685	6.58595	1.0289	141.25	1.44006	1	40.4397	25		2529	59.3116	10.181	1.06377	60.031			47.6652	50
	1134	334.383	33.3946	1.01002	66.5269	1.70334	1	47.8331	25		4113	157.969	27.1157	1.02946	53.4857			51.6387	75
	622	107.392	92.9569	1.02273	56.6465	1.0705	1	30.0617	25		2577	258.43	44.36	1.02516	64.7408			31.1843	50
	366	19.3738	54.3712	1.01842	58.2694	1.60929	1	45.192	25		2833	102.838	17.6523	1.01138	40.8492			57.5836	75
	878	382.187	17.4621	1.02693	73.4797	1.37683	1	38.664	25		4241	523.145	89.7989	1.02337	47.7778			43.2881	75
	238	545.664	3.15021	1.01838	69.3467	1.53719	1	43.1672	25		1681	82.8015	14.213	1.02014	39.3724			50.6508	25
	1262	373.272	62.1442	1.03736	47.8052	2.27893	2	63.9967	50		2961	320.181	54.9597	1.02501	213.271			59.2868	75
	750	163.09	88.7259	1.06235	106.693	1.19765	1	33.6323	25		3985	164.308	28.2038	1.05044	111.59			66.1559	25
	494	54.8738	60.6946	1.02079	56.9808	1.52784	2	42.9047	50		4177	516.402	88.6414	1.06209	167.053			53.7082	50
	1006	383.736	26.5187	1.02777	41.8779	1.80212	3	50.607	75		3153	197.443	33.8915	1.02621	149.272			51.6387	75
	1054	320.262	8.92257	1.01769	88.407	1.73102	1	48.6104	25		849	168.172	28.8671	1.02282	61.0381			55.3572	75
	542	62.3548	62.3961	1.00434	44.0674	1.22863	2	34.5023	50		3921	164.134	28.1739	1.02302	121.437			51.5347	75
	1310	147.837	52.0751	1.06549	74.9554	1.67129	2	46.933	50		4305	239.866	41.1735	1.02658	42.9672			46.6478	50
	798	166.489	10.139	1.01488	51.1269	1.18643	1	33.3172	25		2257	61.312	10.5243	1.02451	162.443			48.849	75
	158	330.172	24.0385	1.01539	50.3802	1.15581	1	32.4574	25		3281	141.932	24.3629	1.05367	59.3127			43.8871	25
	1182	330.185	27.0714	1.01782	63.9462	1.7425	2	48.9327	50		3793	54.7447	9.39704	1.03638	28.885			48.3731	25
	670	141.107	53.6865	1.01882	93.4332	1.03807	1	29.151	25		3537	376.554	64.6363	1.05044	121.184			44.7714	25
	414	30.3248	53.6886	1.01753	92.0358	0.936724	1	26.305	25		4049	264.032	45.3216	1.01438	39.2289			66.9629	25
	926	200.982	22.9442	1.01389	57.3482	2.16316	2	60.7457	50		4145	269.421	46.2467	1.01546	69.0052			52.5239	75
	94	337.294	4.93086	1.04883	117.165	1.43277	1	40.2349	25		2097	175.078	30.0525	1.02311	76.3056			37.9333	25
	1118	312.969	32.68	1.01176	30.3989	1.88384	3	52.9018	75		1073	232.652	39.9352	1.02762	73.549			100	100
	606	107.864	54.8446	1.02423	201.925	1.68843	1	47.4144	25		3121	88.5688	15.203	1.01971	84.7792			46.6478	50
	350	414.697	50.8893	1.02305	98.8709	1.85308	1	52.038	25		3633	232.423	39.8959	1.03471	108.43			63.9393	25
	862	185.489	17.5389	1.03818	86.0163	1.9664	2	55.2203	50		2353	76.6395	13.1553	1.0233	106.887			56.5885	50
	222	416.285	67.4304	1.03132	205.46	1.12285	1	31.5318	25		4273	365.319	62.7077	1.01141	23.3868			56.6621	25
	1246	532.692	30.1608	1.01901	54.1997	1.78945	2	50.2512	50		3249	405.803	69.6569	1.03952	146.993			25.4438	25
	734	362.754	67.6886	1.0739	38.2857	1.33348	2	37.4467	50		689	144.944	24.8799	1.01675	79.9227			52.8437	75
	478	59.6343	86.6166	1.02142	64.1064	1.00581	1	28.2451	25		1713	248.486	42.6531	1.02452	65.0899			68.719	50
	990	406.319	58.9844	1.01527	73.3632	2.23501	3	62.7634	75		3761	320.328	54.9849	1.00588	45.0491			47.2615	25
	62	439.349	9.69663	1.05303	82.5549	1.27905	1	35.9182	25		433	180.696	31.0168	1.01826	24.5577			48.9866	75
	1086	250.843	66.0681	1.01913	147.94	1.11285	1	31.251	25		2481	493.172	84.654	1.0339	54.5841			54.3912	50
	574	101.544	71.4389	1.01503	77.1736	1.11285	1	31.251	25		4209	142.5	24.4604	1.01737	40.7397			49.7712	25
	318	0	40.7875	1.00761	42.7374	1.92076	2	53.9386	50		2161	86.3909	14.8292	1.01046	72.6673			39.3036	25
	1342	120.889	16.5112	1.0284	98.9596	1.17322	1	32.9463	25		1137	371.859	63.8303	1.00573	34.8758			40.5318	50
	830	175.744	0	1.01452	67.7134	1.06275	1	29.8441	25		2417	251.132	43.1073	1.05563	83.4352			46.3136	25
	190	427.914	19.6567	1.01017	62.122	1.78472	2	50.1184	50		3441	394.232	67.6707	1.05842	234.092			42.5422	25
	1214	343.73	28.5763	1.01721	25.643	1.49529	2	41.9906	50		4337	20.6016	3.53631	1.03312	151.004			32.475	25
	702	129.821	69.5795	1.01018	88.9677	1.41496	1	39.7348	25		3313	241.908	41.524	1.04266	101.985			54.443	75
	446	51.9591	55.8911	1.06534	82.8274	0.975474	1	27.3932	25		2801	440.734	75.6529	1.03638	52.8093			37.6884	25
	958	217.729	21.1091	1.01597	115.429	2.39579	2	67.2784	50		4105	202.452	34.7513	1.04801	86.3114			60.7541	50
	126	392.5	8.44863	1.02483	70.7658	1.40153	1	39.3577	25		521	153.034	26.2686	1.04278	83.2997			47.4638	75
	1150	268.621	35.4031	1.01867	50.8686	1.08961	1	30.5983	25		2569	223.197	38.3122	1.01018	45.093			86.1283	100
	638	106.802	63.8211	1.00741	41.5302	1.15049	2	32.308	50		265	404.611	69.4523	1.06508	167.615			55.2104	50
	382	476.891	43.6782	1.0309	30.38	1.15049	2	32.308	50		2825	58.6528	10.0679	1.02633	160.806			34.2448	25
	894	193.07	17.3662	1.01452	75.9957	1.1028	1	30.9687	25		4233	24.8889	4.27223	1.05088	87.3345			51.0091	50
	254	419.273	77.5433	1.02993	105.33	1.77611	1	49.8766	25		2697	272.333	46.7465	1.04093	65.9725			55.4194	50
	1278	385.817	31.3935	1.0165	69.8855	2.19378	1	61.6056	25		2953	260.426	44.7026	1.02192	325.334			48.4085	50
	766	160.542	68.1745	1.01852	110.415	1.33337	1	37.4436	25		4169	568.222	97.5365	1.04191	66.1956			57.7316	50
	510	423.796	62.7345	1.00531	26.8974	1.57505	2	44.2304	50		3657	92.5142	15.8802	1.0495	56.0699			48.5928	75
	1022	233.454	26.1044	1.01476	92.8112	1.54904	1	43.5	25		2377	540.198	92.7261	1.04116	607.255			47.1994	75
	1	564.213	68.9099	1.01427	176.626	1.45069	1	40.7382	25		3401	110	18.8817	1.01173	37.3538			56.466	75
	1025	360.746	37.96	1.02855	36.3305	1.37771	2	38.6887	50		4297	265.902	45.6426	1.05179	126.604			34.7863	50
	513	57.9589	91.742	1.04779	133.641	1.45388	1	40.8277	25		2249	88.9458	15.2677	1.02935	68.4544			49.2473	50
	257	431.14	58.6579	1.00319	39.2216	1.78472	2	50.1184	50		2761	235.714	40.4608	1.03861	32.8868			58.0142	25
	1281	317.918	9.42421	1.02026	69.4037	1.27339	2	35.7592	50		2505	491.352	84.3416	1.00922	45.2556			64.081	50
	769	352.243	70.1041	1.02491	63.2015	1.37771	2	38.6887	50		3529	9.17052	1.57414	1.03292	103.679			36.9236	50
	129	392.798	51.694	1.02629	135.852	1.19054	1	33.4326	25		4137	184.352	31.6444	1.04513	252.821			48.485	25
	1153	267.721	57.2753	1.01651	151.705	1.22046	1	34.2729	25		3113	69.8628	11.9921	1.02216	90.5785			41.6226	25
	641	466.074	63.8696	1.02893	83.4145	1.86191	1	52.286	25		297	151.226	25.9582	1.0051	26.6951			47.0254	25
	385	465.75	43.5319	1.02367	55.7352	1.56343	1	43.9041	25		4265	392.044	67.2951	1.02263	49.1162			44.5244	75
	897	214.142	75.7844	1.02617	118.484	2.61683	4	73.4856	100		2217	125.688	21.5746	1.02113	68.031			27.69	25
	577	490.611	75.7317	1.04121	42.2159	1.42326	3	39.9679	75		2729	175.865	30.1876	1.00671	28.0549			34.0602	25
	321	10.5726	34.8198	1.04579	128.01	1.58694	1	44.5643	25		3753	257.166	44.1431	1.03117	58.34			42.7183	75
	833	434.706	79.7741	1.01286	66.1997	2.11465	1	59.3834	25		4201	125.349	21.5164	1.02079	87.9584			45.3039	75
	193	435.455	1.71912	1.02266	32.9496	1.46788	2	41.2209	50		1129	76.2797	13.0936	1.0158	84.7104			37.2885	50
	1217	318.389	70.6839	1.02206	155.85	1.38367	1	38.8561	25		3177	337.996	58.0177	1.05433	121.949			59.6199	50
	705	503.665	70.8057	1.03756	77.4154	1.48876	1	41.8072	25		3689	154.286	26.4835	1.03999	53.1867			52.689	25
	449	45.4296	51.7706	1.01839	70.4886	1.04924	1	29.4647	25		2409	109.679	18.8266	1.04018	116.374			47.0259	50
	961	330.755	81.8967	1.02499	39.4669	1.04924	1	29.4647	25		3433	326.973	56.1256	1.03917	186.921			37.8422	50
	33	379.547	7.38693	1.03899	83.7639	1.42073	1	39.8968	25		2921	431.447	74.0587	1.05831	60.8737			38.1158	25
	1057	301.668	53.7813	1.02009	55.1286	1.648	2	46.279	50		3945	379.239	65.0971	1.02909	602.286			56.166	50
	545	86.5246	61.715	1.02072	142.618	1.33367	1	37.452	25		233	66.5554	11.4244	1.0135	34.3906			48.9866	75
	289	0	49.0517	1.01302	115.906	1.33367	1	37.452	25		4329	514.802	88.3668	1.02373	54.7848			41.3215	25
	1313	242.357	14.069	1.01643	68.0588	1.4449	1	40.5756	25		745	518.55	89.0102	1.03973	90.1605			62.7017	100
	801	173.736	0	1.0085	156.229	1.32996	1	37.3478	25		2793	363.191	62.3425	1.0091	30.5497			57.697	75
	161	461.595	39.4076	1.05967	102.008	1.32996	1	37.3478	25		3817	295.659	50.7505	1.05098	90.4407			40.0402	50
	1185	313.186	28.2498	1.01794	61.3183	1.08889	1	30.5781	25		2537	421.474	72.3469	1.01223	39.9833			42.7745	75
	673	410.75	75.0561	1.00959	33.7984	1.6679	2	46.8378	50		3561	220.539	37.856	1.00809	67.1244			62.0557	75
	417	40.7422	50.9246	1.0103	65.1223	1.03848	1	29.1625	25		4121	311.899	53.5381	1.0491	125.066			41.2574	50
	929	198.063	66.7886	1.01386	37.8342	1.12946	1	31.7174	25		3097	416.788	71.5425	1.02704	47.6375			55.2399	25
	97	535.63	6.62475	1.05037	115.416	1.91265	2	53.7109	50		4249	500.134	85.849	1.00164	22.1402			43.0317	25
	1121	523.248	32.2054	1.01614	45.9162	2.16265	2	60.7314	50		3225	232.93	39.9829	1.03362	170.917			49.8271	25
	609	457.865	87.0943	1.02549	69.4003	1.65813	2	46.5635	50		2969	389.014	66.775	1.05247	49.8587			39.4663	50
	353	432.315	85.081	1.0276	64.4434	1.4776	1	41.4938	25		1945	160.76	27.5948	1.01606	47.7289			47.8811	25
	865	525.744	74.4496	1.04996	69.1192	1.55645	1	43.7081	25		4185	377.194	64.7461	1.03168	172.585			46.673	50
	225	332.277	70.2951	1.02947	90.2444	1.57029	1	44.0968	25		3673	106.34	18.2535	1.0417	53.4673			45.5085	25
	1249	339.527	85.4868	1.00718	65.7877	1.87098	1	52.5407	25		3417	168.009	28.8391	1.01377	44.4047			54.5054	25
	737	137.917	54.0288	1.02697	85.5518	0.994276	1	27.9212	25		3929	49.0199	8.41436	1.01615	64.3068			52.7177	75
	481	482.577	55.2076	1.02897	57.911	0.994276	1	27.9212	25		4313	414.903	71.2189	1.00823	14.7295			54.3912	50
	993	231.847	22.4255	1.0094	42.7155	2.37554	3	66.7097	75		3289	333.073	57.1727	1.02116	98.6971			58.6066	25
	17	361.825	78.4678	1.01954	99.895	2.0714	1	58.1689	25		3545	39.439	6.76978	1.05229	190.722			55.5107	75
	1041	449.457	37.6987	1.06181	122.075	1.63468	1	45.905	25		3033	241.495	41.4531	1.05075	228.175			84.8904	50
	529	451.045	58.8333	1.06585	245.408	1.58114	1	44.4014	25		4153	350.47	60.1589	1.04954	252.856			45.3039	75
	273	399.803	73.0824	1.0152	87.1362	1.81152	3	50.871	75		1081	434.851	74.643	1.0279	79.0163			39.7764	25
	1297	309.661	73.3407	1.02157	86.2905	1.97866	3	55.5646	75		3129	309.684	53.1579	1.01096	32.7813			48.8377	75
	785	480.569	65.0086	1.01372	65.7041	1.60073	1	44.9516	25		3641	267.702	45.9516	1.06279	180.26			37.5049	25
	145	326.032	50.3514	1.04189	96.9133	1.0178	1	28.5818	25		3385	303.375	52.0749	1.04327	153.83			55.2104	50
	1169	278.947	78.1413	1.01951	96.0596	1.10034	1	30.8997	25		2873	398.964	68.483	1.07044	227.965			49.6531	75
	657	124.833	53.0133	1.01869	117.327	1.26404	1	35.4967	25		4281	360.142	61.8191	1.05887	94.5162			51.6448	75
	401	40.2308	45.3572	1.02783	155.726	1.35507	1	38.053	25		3257	184.204	31.619	1.02565	52.7149			57.3279	50
	913	205.97	20.298	1.02704	141.466	1.16149	1	32.6169	25		2745	217.123	37.2696	1.03095	57.638			51.3784	50
	81	425.051	6.54159	1.01545	40.7162	1.58979	1	44.6444	25		3769	159.111	27.3117	1.03491	90.0303			52.134	50
	1105	265.101	33.4911	1.01644	61.8054	1.052	1	29.5422	25		3513	71.2442	12.2292	1.01609	89.7053			56.9403	75
	593	103.596	69.114	1.05493	176.611	1.45217	1	40.7797	25		4217	92.9044	15.9472	1.04515	58.4396			34.6151	25
	337	12.1968	43.1059	1.0296	137.653	1.94654	1	54.6626	25		3705	309.165	53.0688	1.01016	25.5789			52.054	50
	849	180.772	16.8449	1.01899	142.497	1.79699	1	50.4629	25		2937	34.631	5.94448	1.03201	219.869			43.2686	50
	209	425.567	1.98322	1.03258	60.1223	1.40122	1	39.3489	25		4345	0	0	1.02688	131.003			52.6825	100
	1233	332.088	0	1.0209	135.829	1.6361	1	45.9448	25		1273	297.491	51.0649	1.03698	99.8896			33.5356	25
	721	131.408	29.3938	1.01879	68.226	1.2074	1	33.9061	25		3321	222.078	38.1201	1.06746	179.537			48.0628	75
	465	438.152	69.1979	1.02627	104.79	1.43561	2	40.3147	50		3833	233.539	40.0874	1.0286	22.2676			59.3794	75
	977	217.729	53.998	1.01616	44.538	1.61172	1	45.2602	25		2553	174.263	29.9126	1.03394	50.5225			41.0143	50
	49	510.883	21.3672	1.01809	34.6664	1.92835	2	54.1518	50		3577	176.042	30.218	1.016	44.1089			37.1476	25
	1073	323.393	71.2442	1.04799	72.8007	1.69694	3	47.6533	75		2041	263.762	45.2753	1.02077	47.436			47.8313	50
	561	84.4535	35.4031	1.02343	125.694	1.36414	1	38.3077	25		4101	175.198	30.0731	1.02912	113.782			58.3179	75
	305	437.154	83.0704	1.02446	46.5889	1.4818	2	41.6118	50		517	323.562	55.5401	1.02541	58.3426			45.4602	25
	1329	465.937	52.5842	1.06091	146.746	1.54831	1	43.4795	25		3589	366.375	62.889	1.00625	44.7662			37.9448	50
	817	189.742	13.7323	1.05517	145.76	2.49711	3	70.1236	75		1797	230.598	39.5826	1.02827	71.6031			55.4194	50
	177	587.151	71.082	1.03477	83.0045	1.75559	1	49.3003	25		4229	81.3547	13.9647	1.03509	73.8668			43.0532	25
	1201	322.213	75.7621	1.03372	75.7775	1.27173	1	35.7126	25		2949	61.5695	10.5685	1.02009	154.131			42.6788	50
	689	123.296	30.8524	1.02049	43.0781	1.0811	2	30.3594	50		3973	163.025	27.9836	1.01902	34.6441			57.1775	50
	433	46.8321	95.4717	1.02451	148.923	1.23677	1	34.7309	25		4165	582.574	100	1.03573	358.645			52.4272	25
	945	505.417	52.3924	1.043	84.6581	1.58243	1	44.4377	25		1093	124.988	21.4544	1.02957	62.1539			61.846	50
	113	319.536	20.0481	1.0099	75.172	1.12535	1	31.602	25		1349	220.553	37.8584	1.01253	57.6617			43.8255	25
	1137	323.216	7.61498	1.02786	45.5452	1.71293	2	48.1024	50		4293	312.096	53.5719	1.01913	45.7931			56.4126	25
	625	101.926	82.1816	1.01394	72.7785	1.37616	1	38.6452	25		3269	199.083	34.173	1.04422	199.109			45.729	25
	369	21.2748	51.9571	1.01748	74.2906	1.44933	1	40.7	25		2501	460.513	79.048	1.01204	51.5074			54.2741	50
	881	193.218	52.5554	1.01558	65.5734	1.9664	2	55.2203	50		3525	119.341	20.4851	1.04504	92.3542			58.331	100
	241	450.415	16.5733	1.04499	65.6422	1.96313	2	55.1285	50		3013	420.557	72.1895	1.04708	203.748			61.5228	50
	1265	359.453	3.45932	1.01899	100.465	1.97377	1	55.4273	25		4133	139.981	24.028	1.04583	58.7245			39.962	25
	753	149.112	31.4176	1.02324	99.292	1.91564	1	53.7949	25		3109	59.5906	10.2288	1.04317	106.522			46.8619	50
	497	427.334	73.2382	1.0178	83.3959	2.38717	2	67.0363	50		4261	388.245	66.643	1.04836	297.885			61.9504	50
	1009	375.54	58.4476	1.05921	65.0752	1.39006	1	39.0356	25		3237	267.148	45.8565	1.05357	220.558			51.2062	25
	9	370.859	24.2459	1.03775	117.1	1.7484	1	49.0984	25		3493	0	0	1.03678	172.755			47.0901	25
	1033	238.263	69.4852	1.02141	94.2915	1.33973	1	37.6222	25		4005	289.451	49.6848	1.02862	119.42			46.5126	50
	521	442.908	61.0634	1.04374	73.8957	1.48037	2	41.5716	50		101	287.105	49.2822	1.00537	31.4703			45.6468	50
	265	422.729	60.3023	1.02474	52.2987	2.06028	1	57.8566	25		4197	194.772	33.433	1.03029	415.97			50.4488	75
	1289	1000	38.742		0.43268	2.06028	1	57.8566	25		3173	323.397	55.5117	1.08203	107.555			46.2872	25
	777	349.493	72.0176	1.0414	148.536	1.16336	1	32.6694	25		3429	282.84	48.5501	1.03587	141.321			43.8584	25
	137	449.723	68.7364	1.04544	43.0718	1.48381	1	41.6682	25		3941	337.468	57.9271	1.02571	49.0445			54.443	75
	1161	306.73	162.602	1.01641	65.6493	1.68067	2	47.1964	50		4325	195.572	33.5703	1.07482	42.3165			53.0578	75
	649	436.6	56.8281	1.01174	68.0738	1.51714	1	42.6042	25		3301	255.938	43.9323	1.00938	48.1159			41.6395	50
	393	30.3615	73.1257	1.00827	46.2344	1.11128	1	31.2069	25		2789	349.26	59.9512	1.02868	187.067			51.8484	25
	905	194.879	49.8748	1.01794	71.3251	2.4624	4	69.1489	100		3813	122.136	20.9649	1.01984	53.3572			55.347	100
	73	424.39	70.9919	1.01112	49.8323	1.40421	1	39.4329	25		1509	115.34	19.7983	1.01803	50.3806			64.8092	50
	1097	318.636	4.93683	1.01258	47.7922	1.82957	2	51.3778	50		4117	286.003	49.093	1.04186	118.114			70.6142	75
	585	86.4305	31.6876	1.01621	65.9254	1.23725	1	34.7444	25		3093	393.579	67.5586	1.02445	150.156			86.1283	100
	329	7.18075	69.0065	1.01377	62.3169	1.43678	1	40.3475	25		1301	363.77	62.4419	1.01137	36.7332			49.2358	50
	1353	448.562	51.8107	1.03337	68.0736	1.52238	2	42.7514	50		2453	450.442	77.3193	1.00705	40.5291			57.8317	25
	841	389.832	14.0537	1.02681	64.4016	1.94563	2	54.637	50		3477	273.868	47.01	1.01152	45.0512			52.3181	50
	201	339.892	1.1676	1.03126	54.1034	1.47425	2	41.3998	50		2965	359.195	61.6565	1.0594	270.035			48.3985	50
	1225	292.847	72.9369	1.03589	197.283	1.20062	1	33.7157	25		4181	472.304	81.0719	1.06715	499.544			62.0382	75
	713	146.236	63.3873	1.03353	154.151	1.43042	1	40.1689	25		3669	99.3885	17.0602	1.01487	43.9248			48.8174	50
	457	343.504	55.267	1.09321	72.7688	1.03663	1	29.1106	25		1365	209.813	36.0148	1.01496	72.902			51.0091	50
	969	231.688	47.6174	1.08	125.823	2.05961	1	57.8378	25		4309	80.5253	13.8223	1.00949	35.4659			72.5561	50
	41	381.222	23.7782	1.03093	123.556	1.49369	1	41.9457	25		3285	220.37	37.827	1.02408	54.1279			46.0439	50
	1065	256.165	55.8543	1.01702	77.8691	1.04672	1	29.3939	25		3797	67.4279	11.5741	1.02508	46.2386			52.5255	50
	553	69.3994	37.6728	1.01319	75.4989	1.4725	2	41.3506	50		469	198.247	34.0295	1.0247	23.1308			43.6266	25
	297	351.635	61.9873	1.01932	66.6756	1.55041	1	43.5385	25		3541	70.3262	12.0716	1.02198	24.5145			37.0013	25
	1321	595.766	41.6528	1.03477	125.187	1.20405	1	33.812	25		981	95.5684	16.4045	1.02841	77.8866			100	100
	809	164.359	11.2845	1.02812	65.3396	1.68964	2	47.4483	50		4053	300.453	51.5734	1.02533	73.8649			50.3695	50
	169	395.45	57.1764	1.00599	104.044	2.00418	1	56.2812	25		4149	290.34	49.8374	1.02909	131.958			36.9236	50
	1193	278.743	96.8725	1.03705	92.3033	0.974193	1	27.3572	25		2101	262.27	45.0192	1.04139	102.483			51.5347	75
	681	465.054	26.725	1.03855	47.2941	1.65813	2	46.5635	50		3637	242.652	41.6517	1.0297	52.1961			43.2686	50
	425	36.7637	64.3008	1.02263	52.2929	1.10107	1	30.9202	25		309	194.198	33.3345	1.0384	77.2282			58.1531	50
	937	222.239	45.3241	1.06627	127.614	2.09467	2	58.8224	50		2357	246.397	42.2945	1.02026	67.9216			54.1943	50
	105	575.988	75.6185	1.02554	113.012	1.45655	1	40.9027	25		3893	0	0	1.03362	146.357			44.9289	25
	1129	267.367	5.97784	1.02468	96.0699	1.07551	1	30.2024	25		4277	355.469	61.017	1.01331	44.6433			55.9509	25
	617	102.729	36.1364	1.01327	64.6137	1.1803	1	33.1451	25		2229	221.575	38.0338	1.04391	90.6895			55.5005	75
	361	428.254	93.6566	1.02031	91.2807	1.83348	1	51.4876	25		3253	169.246	29.0514	1.02179	60.9567			47.8488	75
	873	381.626	43.4743	1.05217	57.5905	1.35986	2	38.1875	50		1717	233.264	40.0402	1.03102	82.3737			53.6299	75
	233	543.191	16.7039	1.00977	100.252	1.60815	1	45.1599	25		3509	181.756	31.1988	1.02278	305.135			58.4162	25
	1257	298.913	69.6348	1.01585	61.0765	1.01337	1	28.4574	25		4213	125.918	21.6141	1.01929	92.3921			41.9832	50
	745	156.645	62.053	1.01732	62.2152	1.11586	1	31.3355	25		3189	398.213	68.3541	1.03392	62.0071			48.4085	50
	489	253.807	88.3237	1.0665	124.635	1.15738	1	32.5015	25		3445	124.158	21.312	1.03177	121.843			46.6917	25
	1001	225.189	48.6037	1.01704	129.33	1.30048	1	36.52	25		4341	24.5583	4.21548	1.05451	96.9199			53.7682	75
	25	398.322	25.4707	1.02739	97.2572	1.56549	1	43.962	25		3573	245.06	42.065	1.0244	35.2868			58.331	100
	1049	239.471	41.2694	1.01838	79.9154	1.13633	1	31.9103	25		4085	73.7392	12.6575	1.0373	223.956			33.6046	25
	281	385.201	36.6161	1.02235	84.412	2.44041	1	68.5314	25		4109	227.276	39.0124	1.04777	89.5782			46.0788	50
	1305	111.958	64.7678	1.03119	87.5774	1.37686	1	38.6649	25		3085	0	0	1.03041	216.179			40.8439	25
	793	160.823	38.9384	1.01874	63.3077	1.35211	2	37.9698	50		2573	472.633	81.1284	1.05001	204.558			42.6182	50
	153	397.812	62.6343	1.06126	149.952	1.8967	1	53.263	25		1549	264.197	45.3499	1.03688	105.408			50.574	75
	1177	347.973	18.2046	1.01022	46.8597	1.71098	1	48.0476	25		3341	390.111	66.9633	1.01672	50.7183			44.1697	25
	665	365.949	26.1501	1.03219	249.946	1.2281	1	34.4874	25		2829	86.2373	14.8028	1.02689	32.5388			33.1678	25
	921	212.868	64.6849	1.0094	98.0321	2.09878	3	58.9378	75		1805	214.405	36.803	1.01724	21.8661			41.6395	50
	89	332.055	56.581	1.01228	71.0562	1.53608	2	43.1361	50		3853	250.427	42.9863	1.0333	178.751			41.4912	25
	1113	341.765	59.5039	1.01665	53.7084	1.4768	1	41.4714	25		4237	127.629	21.9078	1.04097	260.434			39.1894	50
	601	88.3026	34.6127	1.01512	88.0109	1.46429	1	41.1201	25		3725	151.904	26.0746	1.03009	57.8491			49.6097	50
	345	405.522	53.9927	1.00253	20.7861	1.80919	3	50.8055	75		2957	296.792	50.9449	1.05771	201.262			65.314	50
	1369	58.891	55.5715	1.03479	99.9466	0.93597	2	26.2838	50		1933	264.626	45.4236	1.02998	30.3735			51.8548	50
	857	204.787	14.3581	1.01105	71.2576	2.61683	4	73.4856	100		3981	188.388	32.3372	1.03144	76.0647			46.461	25
	217	407.839	65.9385	1.01384	105.994	1.64313	1	46.1422	25		4173	543.401	93.2759	1.01563	49.4589			64.081	50
	1241	540.659	9.57577	1.01761	40.098	1.42053	2	39.8912	50		333	293.01	50.2958	1.01564	42.6091			57.611	50
	729	149.338	33.2987	1.02255	81.1489	1.11116	1	31.2035	25		3917	0	0	1.02616	107.846			54.6157	50
	473	47.2911	66.3153	1.01687	68.2771	1.01826	1	28.5947	25		4301	205.128	35.2106	1.0404	111.061			47.3313	50
	985	512.406	87.912	1.02892	87.7651	1.76866	1	49.6674	25		3277	249.319	42.7961	1.03857	110.497			88.8156	75
	57	441.708	24.2826	1.02118	91.5139	1.71167	1	48.067	25		3533	144.398	24.7862	1.0348	68.7086			52.6825	100
	1081	266.578	7.68961	1.01599	62.3955	1.34366	1	37.7326	25		4045	187.759	32.2292	1.06012	159.312			40.8138	50
	569	95.7207	83.318	1.02023	96.8652	1.13184	1	31.7842	25		4141	243.932	41.8714	1.05884	110.42			52.1885	50
	313	425.849	71.8224	1.01895	40.027	1.46274	2	41.0765	50		301	81.5233	13.9936	1.01236	38.2798			53.5747	25
	1337	243.297	43.346	1.0635	121.797	1.24177	1	34.8713	25		2349	444.447	76.2902	1.06778	386.294			37.7038	75
	825	398.767	15.5643	1.01225	57.6586	1.80919	3	50.8055	75		4269	375.646	64.4804	1.01156	11.6268			40.6824	25
	185	402.071	69.2437	1.02722	167.378	1.33164	1	37.395	25		3757	286.575	49.1912	1.00849	29.579			51.6328	25
	1209	282.445	39.5605	1.01521	73.5292	1.02816	1	28.8727	25		4205	57.0818	9.79821	1.0299	115.832			51.0057	75
	697	554.079	64.8402	1.00856	55.2647	1.45394	2	40.8294	50		1133	128.088	21.9866	1.00497	30.9403			48.0877	75
	441	33.1372	65.3774	1.01018	27.3204	0.772445	1	21.6917	25		3181	361.648	62.0776	1.03844	42.4113			41.8264	25
	953	496.408	45.926	1.01882	98.6835	1.68452	2	47.3046	50		2669	12.5187	2.14886	1.03707	250.71			60.3509	25
	121	408.551	90.0941	1.01927	82.8889	1.63331	1	45.8665	25		3693	163.222	28.0174	1.04262	87.0603			55.347	100
	1145	288.667	5.38816	1.02138	55.7665	1.27967	2	35.9356	50		3437	367.85	63.1422	1.05041	76.0606			42.9773	50
	633	103.677	80.7167	1.0057	61.1315	1.03982	1	29.2001	25		2925	438.743	75.3111	1.042	118.631			48.4843	75
	377	14.1453	66.4311	1.01973	222.716	1.54539	1	43.3975	25		4333	35.5648	6.10477	1.04846	156.989			54.443	75
	889	197.048	46.9377	1.02049	55.4865	1.10624	1	31.0653	25		2285	105.456	18.1017	1.04937	68.49			69.6453	50
	249	414.914	16.858	1.02392	73.8003	1.683	2	47.2619	50		3821	154.003	26.4349	1.03456	52.2321			37.0137	25
	1273	304.42	2.30005	1.01829	69.2497	1.19552	1	33.5725	25		3565	207.064	35.543	1.03921	141.643			92.0341	25
	761	517.587	32.0403	1.04861	59.5461	1.54693	1	43.4408	25		4125	179.642	30.8359	1.01152	48.7905			54.6157	50
	1017	227.996	67.4657	1.01863	68.0582	1.19924	1	33.677	25		3869	208.907	35.8593	1.01805	67.5493			42.9616	50
	5	326.769	49.4992	1.0113	36.8742	1.10431	1	31.0111	25		4253	443.912	76.1984	1.00047	10.1615			44.2208	25
	1029	329.148	84.1605	1.0184	61.5563	1.66844	2	46.853	50		3741	173.885	29.8477	1.02983	196.218			35.784	50
	517	448.939	37.0725	1.01425	83.8042	1.48246	2	41.6303	50		2973	402.051	69.0129	1.03243	139.945			54.7371	50
	1285	376.611	53.1332	1.00931	111.578	1.80559	3	50.7044	75		1949	219.57	37.6896	1.02576	81.904			50.7024	50
	773	161.583	53.52	1.02314	77.6347	1.51601	2	42.5725	50		3165	232.986	39.9925	1.02306	52.7452			69.4659	75
	133	443.463	72.9982	1.00562	33.8021	1.06531	1	29.916	25		2397	488.711	83.8882	1.03646	282.977			52.6232	50
	1157	341.683	61.2376	1.03452	79.0369	1.60559	1	45.0881	25		3421	182.239	31.2817	1.05143	188.087			43.2881	75
	645	117.737	26.2737	1.02554	178.113	1.39789	1	39.2554	25		3933	60.4593	10.378	1.0245	60.6975			44.5244	75
	389	35.1113	72.1078	1.0107	42.1821	0.805407	1	22.6174	25		221	459.564	78.8851	1.04139	113.691			42.7052	25
	901	364.154	55.5582	1.05384	56.4358	1.56577	2	43.9698	50		4317	411.846	70.6942	1.00465	15.1104			59.7226	75
	69	349.005	19.1442	1.02184	98.9657	1.86893	1	52.4831	25		3805	97.9771	16.818	1.0109	25.2083			52.4472	25
	1093	431.472	5.70915	1.00668	22.1253	1.8953	2	53.2237	50		989	22.2841	3.82511	1.0203	155.811			37.0062	25
	581	80.6417	59.212	1.03913	135.14	2.51086	2	70.5098	50		4157	474.608	81.4674	1.02694	557.569			50.7904	25
	325	0	56.7488	1.03512	230.898	1.31358	1	36.8878	25		3389	336.064	57.6861	1.00644	54.2831			45.584	25
	1349		70.158			1.31358	1	36.8878	25		2877	445.848	76.5307	1.02366	68.765			50.8895	25
	837	488.159	13.1125	1.01146	51.3693	1.53433	2	43.0869	50		4285	336.653	57.7872	1.01842	16.3055			37.6874	50
	197	367.638	0	1.01298	42.881	1.611	2	45.24	50		2749	332.317	57.0429	1.03128	500.616			70.6676	50
	1221	288.094	79.3754	1.01212	101.555	0.96415	1	27.0752	25		1725	113.728	19.5216	1.01485	118.512			37.414	25
	709	143.808	59.7785	1.01092	53.0624	1.28663	1	36.131	25		3517	92.2885	15.8415	1.02251	49.7954			50.6372	75
	453	453.337	46.8446	1.01861	79.3507	1.68664	1	47.3641	25		3005	117.569	20.181	1.00762	49.6542			42.9773	50
	965	215.501	23.3834	1.01941	169.556	1.12043	1	31.4638	25		4221	67.0862	11.5155	1.02662	57.0751			37.7413	50
	37	370.783	73.7133	1.05016	110.057	1.43762	1	40.3711	25		2685	47.0604	8.07801	1.04291	197.737			36.0435	25
	1061	266.337	35.0408	1.04878	81.3247	1.24442	1	34.9457	25		381	47.7229	8.19173	1.02725	83.6407			49.4696	25
	549	84.6558	60.2899	1.05655	102.92	1.10029	1	30.8983	25		253	65.9885	11.3271	1.02401	36.5081			56.9403	75
	293		43.3068			1.10029	1	30.8983	25		4349	50.1952	8.61611	1.06998	81.5096			50.3623	75
	1317	319.458	13.7652	1.03082	65.2193	1.10029	1	30.8983	25		2301	478.92	82.2076	1.04126	202.445			45.7641	50
	805	179.861	51.9444	1.02643	87.5243	2.86888	4	80.5637	100		1789	192.2	32.9915	1.02031	39.3029			49.1077	25
	165	426.748	29.2457	1.01915	59.109	1.52451	1	42.8112	25		1533	348.767	59.8666	1.0431	60.6419			46.9833	25
	1189	563.169	69.3899	1.05948	155.363	1.38635	1	38.9314	25		4093	93.4347	16.0383	1.04844	194.922			47.5431	50
	677	475.724	91.5722	1.0084	20.2817	1.63669	2	45.9614	50		4099	150.847	25.8932	1.03325	122.094			58.5715	50
	421	340.702	77.3535	1.0161	85.9524	1.40146	1	39.3557	25		2563	411.571	70.647	1.04126	156.664			61.9504	50
	933	206.378	55.3987	1.03301	76.7041	0.990729	1	27.8216	25		3587	344.508	59.1355	1.04082	116.978			57.5836	75
	101	324.554	33.5574	1.03926	93.6352	1.34249	1	37.6997	25		2819	329.289	56.5231	1.02414	139.144			44.2727	50
	1125	269.193	52.773	1.02508	112.185	1.23965	1	34.8118	25		4227	89.3599	15.3388	1.02732	85.6712			50.7817	100
	613	95.2559	43.7712	1.02386	64.9031	1.25087	2	35.1268	50		2179	557.161	95.6378	1.05589	166.45			47.5913	50
	357	429.815	15.4888	1.03622	134.327	1.46534	1	41.1496	25		3203	163.771	28.1116	1.03332	63.383			47.657	50
	869	193.251	69.8886	1.01002	84.0564	1.12712	1	31.6517	25		2691	466.604	80.0935	1.01545	41.262			34.5081	50
	229	555.598	31.4229	1.02922	139.301	1.61134	2	45.2495	50		2435	25.5042	4.37785	1.02018	140.718			48.8174	50
	1253	309.618	90.3411	1.02159	77.6968	1.27339	2	35.7592	50		4163	548.829	94.2076	1.05125	872.778			45.067	50
	741	141.439	50.3444	1.02379	56.603	1.19187	2	33.47	50		3139	161.591	27.7374	1.03218	129.966			59.1169	75
	485	59.7194	22.9982	1.04587	83.2478	1.42821	1	40.1069	25		3651	369.526	63.4299	1.02982	65.694			48.0877	75
	997	500.078	9.71047	1.00803	25.4362	1.68452	2	47.3046	50		1347	265.89	45.6406	1.0415	120.519			54.0031	75
	21	406.974	81.3135	1.00928	42.9328	1.75514	2	49.2877	50		3395	98.7136	16.9444	1.02175	48.7567			44.4651	75
	1045	251.587	66.1746	1.02413	76.4294	1.5829	1	44.4509	25		4291	318.239	54.6264	1.0483	100.468			35.7855	25
	533	78.3136	40.9085	1.01739	123.032	1.19014	1	33.4214	25		3267	200.822	34.4715	1.04803	114.189			49.322	25
	277		12.7339			1.19014	1	33.4214	25		2755	387.359	66.491	1.02628	24.3972			50.4547	75
	1301	171.09	27.8195	1.03471	100.291	2.86888	4	80.5637	100		2499	27.3173	4.68907	1.0543	108.094			50.3623	75
	789	161.546	26.2676	1.01989	97.7055	1.51601	2	42.5725	50		3523	110.508	18.9689	1.01676	46.6544			57.6197	100
	149	415.655	67.5862	1.01681	62.0789	1.94962	2	54.7491	50		3011	139.067	23.8711	1.04242	59.8343			43.7152	25
	1173	268.845	43.7146	1.01716	86.9048	1.12254	1	31.5231	25		4035	110.77	19.0139	1.0316	246.716			50.4408	75
	661	496.558	80.7411	1.03114	105.652	1.51666	1	42.5907	25		4131	139.113	23.879	1.01174	30.1777			56.1339	50
	405	32.0791	5.21611	1.00976	63.8355	1.12066	1	31.4703	25		2339	28.3073	4.85901	1.01069	131.156			52.6232	50
	917	355.295	57.7715	1.01649	40.5095	1.4797	2	41.5528	50		1315	356.833	61.2511	1.01461	62.2703			52.6825	100
	85	343.184	55.8023	1.03914	65.8148	1.47713	2	41.4806	50		3363	179.891	30.8787	1.0418	191.522			46.7628	25
	1109	258.252	41.9922	1.01754	121.077	1.05302	1	29.5708	25		3875	248.375	42.6341	1.01645	40.9945			41.5985	25
	597	350.174	56.9389	1.02393	96.1368	1.19318	1	33.5068	25		4259	400.708	68.7823	1.00471	9.78672			33.0081	50
	341	11.0847	1.80239	1.00902	52.7011	2.45511	1	68.9442	25		2211	214.727	36.8583	1.01674	25.414			53.0578	75
	853	182.649	74.7369	1.01574	98.4243	1.06548	1	29.9207	25		1187	232.097	39.8399	1.01226	38.3999			37.1738	50
	213	413.328	29.699	1.03358	55.746	1.53137	1	43.0038	25		3747	217.909	37.4045	1.01234	21.2481			58.6672	25
	1237	297.631	67.2078	1.01656	113.968	1.27561	1	35.8216	25		2467	140.301	24.0829	1.00747	32.7876			55.5628	25
	725	361.542	48.3953	1.04478	64.0047	1.73875	1	48.8274	25		4195	249.685	42.8589	1.03902	269.165			44.4882	75
	469	51.2275	58.7873	1.01525	28.6133	1.05312	1	29.5736	25		2147	67.5984	11.6034	1.02605	209.679			63.1914	25
	981	366.195	8.32967	1.01925	138.084	1.33163	1	37.3947	25		3683	138.378	23.7529	1.06267	109.96			59.4441	75
	53	459.039	59.5439	1.11008	55.298	1.33163	1	37.3947	25		3427	274.515	47.1211	1.03046	37.0136			42.4257	25
	1077	291.032	74.6405	1.03487	65.8628	1.70939	2	48.003	50		3939	93.1491	15.9892	1.05206	27.9597			47.8003	50
	565	77.0432	47.3223	1.01267	56.0874	1.4725	2	41.3506	50		4323	516.329	88.6289	1.10734	270.251			33.283	25
	309	427.711	12.5273	1.02265	63.2201	1.57126	2	44.124	50		2531	105.525	18.1136	1.03788	63.0184			50.8351	50
	821	185.64	69.5465	1.02395	86.7424	2.459	2	69.0534	50		4115	277.219	47.5852	1.03617	24.785			52.8447	50
	181	407.055	30.1854	1.03214	90.3259	1.54033	1	43.2554	25		3091	26.4016	4.53189	1.03407	182.284			61.6378	50
	1205	283.874	66.1878	1.04067	101.924	1.03255	1	28.996	25		1555	160.219	27.5019	1.0083	29.7029			55.3572	75
	693	136.922	46.1584	1.02509	73.4693	1.06628	1	29.9432	25		3603	55.8506	9.58687	1.02249	195.783			56.4332	75
	437	336.932	22.2637	1.01699	136.055	1.30298	1	36.5902	25		3347	302.656	51.9515	1.0376	322.008			47.3313	50
	949	209.864	54.7857	1.01514	122.682	1.38622	1	38.9277	25		4243	529.224	90.8424	1.0303	49.0837			48.7617	50
	117	417.909	34.1242	1.01104	54.7061	1.91585	2	53.8007	50		2195	207.953	35.6956	1.00244	17.254			52.4289	50
	1141	311.293	67.9527	1.04349	58.1439	2.06951	2	58.1158	50		2451	427.673	73.4109	1.02007	208.489			48.849	75
	629	111.822	50.6167	1.024	57.5274	0.886596	1	24.8973	25		3987	186.127	31.9491	1.01788	80.4262			60.5562	25
	373	23.0313	18.1824	1.00607	63.8224	1.21894	1	34.2302	25		4179	507.263	87.0727	1.07049	95.333			46.964	25
	885	192.263	3.74493	1.017	63.0026	1.41038	2	39.6062	50		2131	185.291	31.8056	1.02737	37.0094			38.1396	50
	245	307.678	31.2623	1.01817	118.146	1.2875	1	36.1555	25		1107	208.718	35.8269	1.01881	66.3765			49.7974	25
	1269	328.222	50.0289	1.01757	54.2044	1.43885	2	40.4057	50		3923	196.041	33.6508	1.01031	66.28			51.3158	50
	757	524.436	53.3694	1.02741	29.7207	1.43885	2	40.4057	50		4307	155.261	26.6509	1.0301	188.095			80.2342	50
	501	380.465	85.2741	1.01526	68.5277	1.36864	2	38.434	50		3283	286.362	49.1546	1.05054	86.2402			49.1534	25
	1013	362.651	61.8642	1.02647	83.3783	1.27223	1	35.7267	25		3795	123.422	21.1856	1.01557	221.376			41.7922	25
	13	333.519	58.9676	1.02131	82.565	1.36299	1	38.2754	25		3539	383.602	65.8461	1.01709	27.826			62.0382	75
	1037	321.533	54.2307	1.06035	101.757	1.36299	1	38.2754	25		3027	209.886	36.0274	1.04706	66.4502			55.7635	50
	525	71.0567	52.2818	1.02065	83.252	1.08929	1	30.5894	25		4147	276.86	47.5236	1.04859	54.0482			88.687	50
	269	415.545	11.5539	1.02421	64.4629	1.24369	3	34.9252	75		3123	96.9653	16.6443	1.02996	47.3091			34.3916	50
	1293	299.419	67.5683	1.05945	46.9637	1.73375	3	48.687	75		563	227.547	39.0589	1.01621	49.2505			52.8437	75
	781	163.943	48.686	1.00858	108.632	1.22268	1	34.3352	25		1331	48.4014	8.3082	1.04437	70.6626			39.9997	25
	141	548.781	26.6574	1.02134	274.567	1.63907	1	46.0282	25		3379	267.616	45.9368	1.03485	43.8408			49.6531	75
	1165	530.655	89.2327	1.0334	64.8995	1.50413	1	42.2389	25		3891	360.218	61.8321	1.00416	36.1835			54.4194	50
	653	115.814	86.2854	1.00619	80.2864	1.41536	1	39.746	25		4275	358.115	61.4712	1.03187	103.947			40.0402	50
	397	35.3307	18.8315	1.01377	40.3103	0.877806	1	24.6505	25		3251	415.307	71.2883	1.00629	36.0965			39.4663	50
	909	195.873	5.74483	1.00719	88.0266	1.18053	1	33.1515	25		3763	331.353	56.8774	1.02253	168.058			81.3636	50
	77	447.784	31.8493	1.02675	62.4109	1.71476	2	48.1538	50		435	239.051	41.0336	1.01287	37.8042			62.7017	100
	1101	290.633	72.8104	1.03189	52.4404	1.73375	3	48.687	75		2483	0	0	1.02989	225.123			43.1487	25
	589	352.523	47.2574	1.0251	55.24	1.4192	2	39.8539	50		3507	48.3902	8.30628	1.03418	121.447			46.9204	75
	1357	200.124	57.3208	1.01934	73.3937	1.37036	1	38.4823	25		4211	118.381	20.3203	1.01491	55.5352			33.0282	25
	845	419.6	32.5405	1.01021	54.9978	2.0751	2	58.2728	50		3187	380.042	65.235	1.04231	225			39.618	25
	205	341.611	68.2276	1.0397	71.3979	1.44937	2	40.7011	50		2675	367.126	63.0179	1.05074	468.911			40.9914	25
	1229	361.763	55.5465	1.01459	65.9992	1.80786	2	50.7682	50		3699	193.614	33.2342	1.01054	23.3384			39.6986	25
	717	380.631	58.8233	1.02755	80.191	1.54118	2	43.2793	50		371	307.665	52.8113	1.00163	39.9957			38.001	25
	461	441.726	61.8912	1.00841	69.1568	1.48246	2	41.6303	50		1907	127.938	21.9608	1.02301	83.1277			60.0524	75
	973	218.742	71.8254	1.02922	115.797	1.48246	2	41.6303	50		4339	564.824	96.9532	1.03289	157.615			44.4189	50
	45	381.841	35.5678	1.01842	119.744	1.32872	1	37.313	25		3315	249.385	42.8074	1.02076	39.3794			39.9345	25
	1069	248.057	62.088	1.01753	78.7988	1.34476	1	37.7634	25		2803	507.98	87.1958	1.06508	1189.03			69.6453	50
	557	458.9	40.3345	1.01551	61.3352	1.6424	1	46.1217	25		2547	168.738	28.9642	1.02111	28.9458			45.6088	50
	301	346.579	74.6179	1.00442	26.1597	1.44937	2	40.7011	50		3571	222.677	38.223	1.02566	127.215			49.274	25
	1325	555.628	56.3543	1.0495	129.441	1.45394	2	40.8294	50		4083	50.3806	8.64793	1.02085	78.2461			37.0193	25
	813	169.764	90.346	1.01145	56.5718	0.917158	1	25.7556	25		3083	314.082	53.9128	1.00261	19.7673			57.1775	50
	173	586.72	27.6039	1.0111	89.5314	1.36988	1	38.4689	25		2571	110.014	18.8841	1.03196	72.4683			53.144	50
	1197	353.551	95.4016	1.01479	35.5216	2.42009	2	67.9608	50		1547	114.245	19.6104	1.02252	43.4759			49.561	50
	685	144.535	57.488	1.06808	228.756	1.29694	1	36.4206	25		2699	49.125	8.43241	1.02065	192.214			47.4766	50
	429	38.2655	23.5016	1.00569	32.4486	0.762582	1	21.4148	25		3979	179.288	30.7751	1.0385	57.6827			52.8933	50
	941	210.435	6.22203	1.01468	116.216	2.76457	2	77.6344	50		4171	560.885	96.277	1.01834	82.6416			45.182	50
	109	312.254	34.2171	1.02349	124.577	1.19106	1	33.4473	25		1099	436.716	74.9632	1.0732	86.2149			36.9118	25
	1133	381.061	50.773	1.03682	69.0207	1.6281	2	45.7202	50		3659	88.9816	15.2739	1.02946	215.152			43.3512	25
	621		61.9611			1.6281	2	45.7202	50		2891	286.027	49.0971	1.0352	426.372			37.7847	25
	365	17.6709	2.87332	1.01597	146.757	1.80128	1	50.5834	25		3915	107.559	18.4627	1.03276	188.166			58.4647	75
	877	206.274	33.5405	1.01993	97.1402	2.61683	4	73.4856	100		4299	253.779	43.5617	1.01532	17.0191			50.2778	25
	237	307.482	49.9971	1.02133	92.584	1.25106	1	35.1322	25		1227	45.9017	7.87912	1.01449	110.368			60.5319	50
	1261	369.217	60.0353	1.01436	25.4605	2.27893	2	63.9967	50		2763	487.329	83.651	1.04847	764.569			47.0259	50
	749	161.679	26.2893	1.05402	83.9371	1.07843	1	30.2844	25		3531	22.8823	3.92779	1.03406	118.275			58.4313	50
	493	386.095	62.7797	1.03382	61.2953	1.40031	2	39.3234	50		4043	169.882	29.1606	1.03688	40.1383			41.0972	50
	1005	383.02	62.2797	1.02264	36.5001	1.80212	3	50.607	75		4139	221.34	37.9935	1.04931	348.814			45.182	50
	29	389.972	63.4101	1.02323	69.6212	1.52784	1	42.9047	25		3627	160.549	27.5586	1.02821	256.621			88.687	50
	1053	545.123	88.6379	1.03768	96.794	1.26295	1	35.4661	25		3371	16.4133	2.81738	1.02087	143.335			37.9918	50
	541	67.3795	10.956	1.01869	144.21	1.30639	1	36.6859	25		3883	323.149	55.4692	1.02556	76.8917			40.7415	50
	285	463.182	75.3141	1.06883	32.0384	1.79527	1	50.4146	25		4267	396.619	68.0804	1.01733	32.6505			35.4475	25
	1309	70.09	11.3967	1.02239	71.9938	2.85473	2	80.1663	50		2219	215.354	36.9659	1.01963	63.3772			41.3059	25
	797	164.12	26.6862	1.04215	90.8917	1.2539	1	35.2119	25		2731	186.267	31.9731	1.02445	74.5701			44.4882	75
	157	395.733	64.3468	1.01854	87.2401	1.31897	1	37.0392	25		3755	262.903	45.1278	1.00692	22.7921			38.7751	25
	1181	332.678	54.094	1.01878	58.8614	1.7425	2	48.9327	50		4203	104.275	17.899	1.01839	156.499			37.6874	50
	669	131.219	21.3364	1.0292	58.0123	0.99148	1	27.8427	25		3179	104.59	17.9531	1.02863	137.172			59.1169	75
	413	431.77	70.2065	1.03697	73.4176	1.63697	1	45.9693	25		3435	339.682	58.3071	1.0441	83.4896			57.697	75
	925	203.003	33.0086	1.0251	116.237	2.16316	2	60.7457	50		3947	123.256	21.1571	1.0341	64.9076			42.7183	75
	93	325.765	52.9699	1.01189	60.7759	1.53608	2	43.1361	50		235	94.9135	16.2921	1.01833	100.318			57.697	75
	1117	322.054	52.3665	1.02022	63.1037	1.71013	2	48.0237	50		4331	212.674	36.5059	1.01519	49.7214			61.4243	50
	605	456.992	74.3076	1.02091	55.6895	1.66853	1	46.8555	25		1259	417.417	71.6505	1.00398	30.1469			56.2337	50
	349	0	0	1.01385	121.744	1.66853	1	46.8555	25		3819	305.196	52.3875	1.00519	21.1472			49.8038	25
	861	196.453	31.9436	1.01088	68.9618	2.14573	4	60.2562	100		2539	479.696	82.3408	1.09864	230.8			46.7813	25
	221	331.902	53.9678	1.02064	90.1161	1.22946	1	34.5256	25		1515	265.804	45.6258	1.04506	44.0431			57.5836	75
	1245	368.381	59.8993	1.01238	49.2884	1.80786	2	50.7682	50		2331	122.404	21.0109	1.04686	111.047			47.3957	50
	733	472.621	76.8489	1.02589	78.2117	1.51299	1	42.4877	25		4251	514.95	88.3922	1.0137	33.825			45.2847	50
	477	237.168	38.5639	1.07549	148.083	0.999316	1	28.0627	25		1691	146.536	25.1532	1.04146	126.257			69.8704	25
	989	411.985	66.9894	1.00335	23.6988	2.23501	3	62.7634	75		3739	140.767	24.1629	1.03666	218.097			39.7199	25
	61	242.23	39.387	1.02714	93.2922	0.958932	1	26.9287	25		923	459.96	78.9531	1.05705	80.7323			52.7177	75
	1085	252.372	41.0361	1.02567	155.598	1.19425	1	33.5368	25		1947	184.022	31.5877	1.02645	44.7387			54.7371	50
	317	422.484	68.6966	1.01905	37.3642	1.24369	3	34.9252	75		4187	350.608	60.1826	1.06422	385.736			39.7828	50
	1341	127.959	20.8063	1.04609	120.181	1.26773	1	35.6003	25		1115	344.237	59.089	1.02587	165.465			78.8665	100
	829	395.64	64.3317	1.00992	47.1741	1.71908	2	48.2751	50		2395	210.809	36.1858	1.0332	54.6744			78.8665	100
	189	452.818	73.6289	1.04265	23.778	1.75868	2	49.3871	50		3419	172.819	29.6647	1.01787	23.1969			58.7763	25
	1213	346.901	56.4067	1.04374	61.8686	1.95779	2	54.9785	50		4315	363.298	62.3608	1.02695	27.0634			44.0601	25
	701	127.663	20.7582	1.00935	41.4034	1.0811	2	30.3594	50		3291	170.681	29.2977	1.00943	61.8661			44.3471	25
	445	45.7596	7.44059	1.01078	45.5063	0.967961	1	27.1822	25		475	42.3097	7.26255	1.01818	55.9894			60.5319	50
	957	223.939	36.4128	1.02296	107.828	2.37554	3	66.7097	75		1499	242.165	41.5681	1.00883	30.7021			41.3341	25
	125	396.186	64.4205	1.0143	75.4162	1.50775	1	42.3405	25		3035	257.72	44.2382	1.01993	181.375			45.8576	75
	1149	550.232	89.4686	1.04874	137.21	1.42769	1	40.0923	25		4155	409.039	70.2124	1.04121	668.337			48.0282	50
	637	100.481	16.3384	1.0221	73.243	1.33839	1	37.5846	25		3131	130.883	22.4663	1.04923	91.2515			37.953	25
	893	491.496	79.918	1.02256	73.2713	1.61609	1	45.3829	25		3387	322.982	55.4405	1.03662	129.231			48.8359	50
	253	396.565	64.4821	1.02047	103.317	1.92898	1	54.1695	25		4283	349.052	59.9155	1.04068	48.9527			44.6564	25
	1277	305.181	49.6229	1.05997	112.802	1.07645	1	30.2288	25		3259	206.881	35.5115	1.05034	235.082			42.7183	75
	765	502.305	81.6756	1.03045	197.026	1.64412	1	46.17	25		2747	338.651	58.1301	1.04305	322.047			71.6342	75
	509	449.601	73.1059	1.01648	94.653	1.71347	1	48.1175	25		3771	189.179	32.473	1.02392	87.3964			60.1646	50
	1021	550.555	89.5211	1.05033	86.0761	1.71347	1	48.1175	25		3515	85.5932	14.6922	1.03269	46.5172			69.0246	25
	3	539.566	87.7343	1.04141	90.8211	1.42041	2	39.8878	50		3003	305.309	52.4069	1.04531	184.55			49.2473	50
	1027	233.518	37.9704	1.02849	105.62	1.16689	1	32.7685	25		4219	72.8082	12.4977	1.03501	21.807			54.1879	50
	515	449.372	73.0686	1.01793	88.514	1.71461	1	48.1495	25		2171	80.2688	13.7783	1.06865	63.5046			38.4251	25
	259	514.968	83.7346	1.00545	31.3212	1.73615	2	48.7544	50		3707	323.347	55.5032	1.03393	56.8308			33.5351	25
	1283	307.055	49.9276	1.05787	109.753	0.977759	1	27.4574	25		2427	279.566	47.9881	1.0376	170.862			48.5718	50
	771	156.923	25.5159	1.04948	97.848	1.67129	2	46.933	50		4347	32.685	5.61045	1.02634	108.447			38.2654	25
	131	449.613	73.1078	1.05335	40.8487	1.26659	2	35.5683	50		3323	231.257	39.6957	1.02895	294.96			51.2719	75
	643	461.261	75.0018	1.02755	99.6017	1.57764	2	44.3032	50		1787	206.944	35.5224	1.04066	91.0831			78.8665	100
	387	382.063	62.1241	1.01959	108.453	1.67878	1	47.1434	25		3835	237.721	40.8053	1.05436	95.7167			55.3572	75
	899	372.792	60.6166	1.02024	67.6973	1.51749	1	42.614	25		507	135.856	23.32	1.01097	28.3184			50.5399	50
	67	435.842	70.8686	1.01823	36.9045	1.21984	1	34.2554	25		3579	281.309	48.2873	1.0126	32.9088			58.3179	75
	1091	336.957	54.7898	1.0401	78.6207	1.70754	1	47.951	25		3067	241.988	41.5377	1.02755	248.017			45.0511	50
	579	354.645	57.6659	1.03061	86.0146	1.6138	1	45.3186	25		2055	221.593	38.0369	1.02267	84.1369			58.7619	25
	835	494.13	80.3463	1.02017	49.1394	1.49992	1	42.1206	25		2567	429.134	73.6617	1.03102	248.141			47.5913	50
	195	431.696	70.1945	1.00903	69.2032	1.42886	1	40.1251	25		2823	364.328	62.5376	1.0125	74.9592			54.9779	25
	1219	301.878	49.0859	1.01294	87.1697	1.19731	1	33.6228	25		4231	65.1673	11.1861	1.01472	50.9291			45.9566	50
	707	141.569	23.0193	1.02173	61.423	1.21257	1	34.0513	25		2183	136.03	23.3498	1.02825	77.0816			47.0726	50
	451	453.014	73.6608	1.01896	55.4496	1.46124	1	41.0344	25		1159	411.131	70.5715	1.01113	59.2931			47.1283	75
	963	216.992	35.2833	1.00207	43.7712	1.00232	1	28.1471	25		2695	87.4721	15.0148	1.01812	138.803			35.5794	25
	35	569.288	92.5672	1.03759	95.4843	1.91583	1	53.8002	25		1415	135.53	23.264	1.02879	46.6859			49.2358	50
	1059	284.568	46.2712	1.0407	79.5636	1.54828	2	43.4787	50		3463	172.272	29.5708	1.04654	284.993			43.9315	25
	547	84.9514	13.8132	1.02945	148.874	1.27719	1	35.8659	25		2375	522.911	89.7587	1.05107	115.961			48.5456	25
	291	447.782	72.8101	1.03748	32.4587	1.19907	1	33.6722	25		3399	407.556	69.9578	1.03541	105			59.7449	50
	1315	283.348	46.0728	1.02123	47.2686	1.19907	1	33.6722	25		3911	97.2929	16.7005	1.04059	230.053			48.2402	25
	803	177.642	28.8849	1.0357	155.299	1.22032	1	34.2689	25		4295	338.687	58.1363	1.01119	22.3281			62.7017	100
	163	395.399	64.2925	1.0155	83.141	2.1658	2	60.8198	50		2247	84.5907	14.5202	1.03806	31.953			83.595	50
	1187	301.399	49.008	1.02721	110.038	1.2028	1	33.7769	25		3271	94.0154	16.1379	1.039	64.716			50.8168	50
	675	119.989	19.5104	1.01569	65.5621	1.07601	1	30.2164	25		2759	431.499	74.0677	1.01148	27.6721			56.7568	75
	419	566.716	92.1489	1.01667	99.4612	1.51457	1	42.532	25		3527	127.014	21.8022	1.02577	43.0031			55.6675	50
	931	205.82	33.4667	1.01307	63.2689	1.24204	1	34.8789	25		3015	181.438	31.1442	1.05878	87.4194			55.4717	25
	99	320.491	52.1124	1.01709	54.8317	1.56722	1	44.0105	25		4135	153.746	26.3908	1.02947	107.862			33.9709	25
	1123	292.81	47.6114	1.03394	70.9174	1.50472	1	42.2554	25		1319	39.2913	6.74443	1.0289	127.64			58.5653	75
	611	451.155	73.3585	1.01884	76.9383	1.43561	2	40.3147	50		3879	259.042	44.4651	1.02685	137.31			51.9415	75
	355	19.9515	3.24415	1.01784	93.1067	1.21955	1	34.2473	25		4263	397.463	68.2253	1.03111	29.1413			40.7443	25
	867	185.787	30.2093	1.01225	43.5095	1.04578	1	29.3675	25		1191	335.396	57.5714	1.00701	46.5895			55.2695	50
	227	600.962	97.7174	1.04186	195.575	1.25241	1	35.1701	25		3239	289.708	49.729	1.01661	31.3888			57.9005	25
	1251	321.47	52.2715	1.01333	85.8451	1.27506	1	35.8061	25		2983	78.2995	13.4403	1.0271	178.585			50.574	75
	739	139.819	22.7348	1.03737	102.403	1.65069	1	46.3545	25		4007	300.831	51.6382	1.01917	53.4038			46.2623	25
	483	476.84	77.535	1.03188	91.5967	1.49059	1	41.8586	25		4199	118.481	20.3375	1.02438	300.669			50.7817	100
	995	226.037	36.754	1.00807	61.4051	2.72113	4	76.4146	100		3175	332.196	57.0221	1.02313	110.565			52.1885	50
	19	409.017	66.5068	1.01876	88.2775	1.91674	1	53.8257	25		3431	228.739	39.2635	1.07669	131.009			60.6132	25
	1043	273.469	44.4665	1.02198	54.6872	1.91674	1	53.8257	25		2919	417.1	71.5961	1.02426	71.6338			47.0736	25
	531	72.319	11.7592	1.02482	75.2122	1.3236	1	37.1692	25		3943	104.773	17.9845	1.02931	57.557			40.0333	25
	275	503.264	81.8315	1.02895	105.899	1.62136	1	45.5309	25		4327	506.982	87.0245	1.00587	64.414			57.3071	25
	1299	198.459	32.2698	1.04798	79.1298	2.49711	3	70.1236	75		3815	266.27	45.7058	1.04978	54.1933			45.5775	25
	787	167.935	27.3065	1.02014	71.8418	2.86888	4	80.5637	100		3559	208.262	35.7486	1.01423	86.7185			51.8096	50
	147	406.2	66.0488	1.02865	164.736	2.06122	1	57.883	25		4119	296.361	50.871	1.01621	57.4308			64.6868	50
	1171	275.637	44.819	1.00874	109.088	1.01141	1	28.4023	25		3095	408.011	70.0359	1.03689	125.296			42.2139	50
	659	503.319	81.8405	1.03415	65.0278	1.41646	1	39.7769	25		4247	523.46	89.853	1.0426	42.4712			56.5885	50
	403	439.592	71.4784	1.00443	35.3133	1.88594	2	52.9608	50		2711	104.589	17.9529	1.01219	39.7733			53.7082	50
	915	214.039	34.8031	1.01984	101.093	2.09467	2	58.8224	50		3991	211.462	36.2979	1.03392	38.0634			59.1685	50
	83	350.253	56.9517	1.03207	90.8203	1.68441	1	47.3015	25		4183	429.392	73.706	1.03232	476.112			47.8488	75
	1107	258.153	41.9761	1.01232	144.146	1.18632	1	33.3141	25		1623	314.897	54.0527	1.0097	29.6036			31.5595	25
	595	110.113	17.9046	1.03225	108.378	1.18632	1	33.3141	25		2391	195.824	33.6136	1.02152	109.104			47.9329	25
	339	436.015	70.8967	1.01075	109.061	1.51367	1	42.5068	25		3415	147.248	25.2754	1.02033	37.8558			49.6531	75
	1363	496.749	80.7722	1.06261	41.0664	1.42326	3	39.9679	75		2903	269.329	46.2309	1.05255	86.3391			59.3794	75
	851	179.102	29.1223	1.02249	88.312	1.33435	1	37.4711	25		4311	132.641	22.7681	1.03347	60.541			41.2574	50
	211	414.65	67.4228	1.02892	48.389	1.44977	1	40.7123	25		2775	182.23	31.2801	1.028	72.0948			53.7677	50
	1235	302.317	49.1572	1.00857	68.0478	1.19374	1	33.5225	25		3799	75.1807	12.9049	1.02277	91.9716			53.6299	75
	723	368.085	59.8512	1.01862	55.2532	1.60178	1	44.9811	25		3543	418.586	71.8511	1.0424	819.945			40.8937	25
	467	445.381	72.4197	1.03419	219.954	1.46337	1	41.0942	25		3031	273.799	46.9981	1.04079	202.689			56.2337	50
	979	217.958	35.4403	1.01868	144.695	1.18841	1	33.3728	25		4055	323.58	55.5432	1.04055	157.208			46.3996	50
	51	521.67	84.8244	1.01778	86.874	1.65882	1	46.5829	25		4151	313.996	53.898	1.03775	321.654			69.7577	25
	1075	309.717	50.3605	1.03043	67.39	1.70731	2	47.9445	50		3383	294.512	50.5536	1.06261	86.4534			34.38	50
	307	0	0	1.02632	118.567	1.58169	1	44.4169	25		3895	0	0	1.0553	95.2212			38.1307	50
	1331	402.343	65.4216	1.07387	194.387	1.33112	1	37.3804	25		4279	345.65	59.3315	1.00151	14.7784			92.7849	25
	819	436.832	71.0296	1.01067	94.0162	1.78786	1	50.2065	25		2231	256.996	44.1139	1.03365	57.6837			57.9375	50
	179	420.59	68.3886	1.01439	48.1935	1.66931	2	46.8774	50		1719	179.545	30.8193	1.03227	100.654			39.5038	25
	1203	523.944	85.1941	1.04017	140.99	1.67794	1	47.1198	25		439	195.978	33.64	1.01955	28.376			48.0574	75
	691	133.669	21.7348	1.00931	34.7274	1.07961	1	30.3175	25		2999	88.1438	15.1301	1.02026	18.5647			64.0184	50
	435	339.05	55.1301	1.04806	71.4904	1.46951	1	41.2667	25		4215	130.808	22.4535	1.03309	64.3897			44.5298	25
	947	206.948	33.6501	1.00547	45.6115	0.981693	1	27.5678	25		3703	277.633	47.6563	1.03484	145.312			55.937	50
	115	315.805	51.3504	1.02161	116.204	1.02734	1	28.8497	25		887	168.915	28.9946	1.03636	109.433			47.715	75
	1139	316.75	51.5041	1.02203	25.104	1.66036	3	46.6261	75		2935	29.2157	5.01493	1.02415	168.764			54.3285	50
	627	110.173	17.9143	1.00465	41.7392	1.01005	1	28.3641	25		4343	6.64112	1.13996	1.01822	37.9297			36.968	25
	371	24.6425	4.00691	1.03118	41.8353	0.954072	1	26.7922	25		1271	209.376	35.9398	1.03277	99.6707			50.6372	75
	883	375.972	61.1337	1.02575	77.8312	1.63774	2	45.9909	50		2807	57.5877	9.88504	1.03331	202.88			47.2389	25
	243	444.156	72.2205	1.01236	45.5496	1.96313	2	55.1285	50		1783	254.954	43.7634	1.00233	17.3295			48.6929	50
	1267	335.941	54.6246	1.01925	130.754	1.72655	1	48.4848	25		3831	212.355	36.4512	1.03636	66.2487			58.8949	25
	755	149.254	24.2689	1.01494	56.5874	1.34734	1	37.8359	25		3575	43.9501	7.54412	1.02205	169.58			53.7184	75
	499	61.8436	10.0559	1.01878	61.8435	1.32267	1	37.1431	25		2039	244.999	42.0546	1.06675	64.5261			45.6217	25
	1011	363.189	59.0551	1.00769	48.9788	1.42308	2	39.9628	50		4111	235.927	40.4973	1.02334	32.7412			38.5239	25
	11	405.923	66.0037	1.0214	54.8963	1.85349	2	52.0496	50		1551	278.811	47.8585	1.04496	104.915			54.2536	50
	1035		12.6488			1.85349	2	52.0496	50		2319	244.478	41.9651	1.00932	47.6479			49.5602	25
	523		68.6294			1.0678	1	29.9859	25		3855	234.141	40.1908	1.01176	78.306			44.4189	50
	267		48.3685			1.46274	2	41.0765	50		143	465.327	79.8743	1.01967	41.0319			52.6825	100
	1291		25.6255			1.73375	3	48.687	75		2191	160.033	27.47	1.02865	71.2877			100	100
	779		71.4545			0.997024	1	27.9983	25		3471	224.845	38.5951	1.03487	197.894			61.7305	75
	139		49.9598			1.22705	1	34.4579	25		1935	304.368	52.2454	1.05049	103.705			39.6596	25
	1163		67.7265			1.45207	1	40.7769	25		3983	197.204	33.8505	1.06467	108.095			57.3279	50
	651		5.03132			2.00476	1	56.2975	25		4175	529.478	90.886	1.10448	370.1			56.3313	25
[truncated: 236 more rows]
