# Supplementary figures and images for: Accurate and versatile 3D segmentation of plant tissues at cellular resolution
Source: eLife journal article supplement (doi:10.7554/elife.57613), 2020-07-29

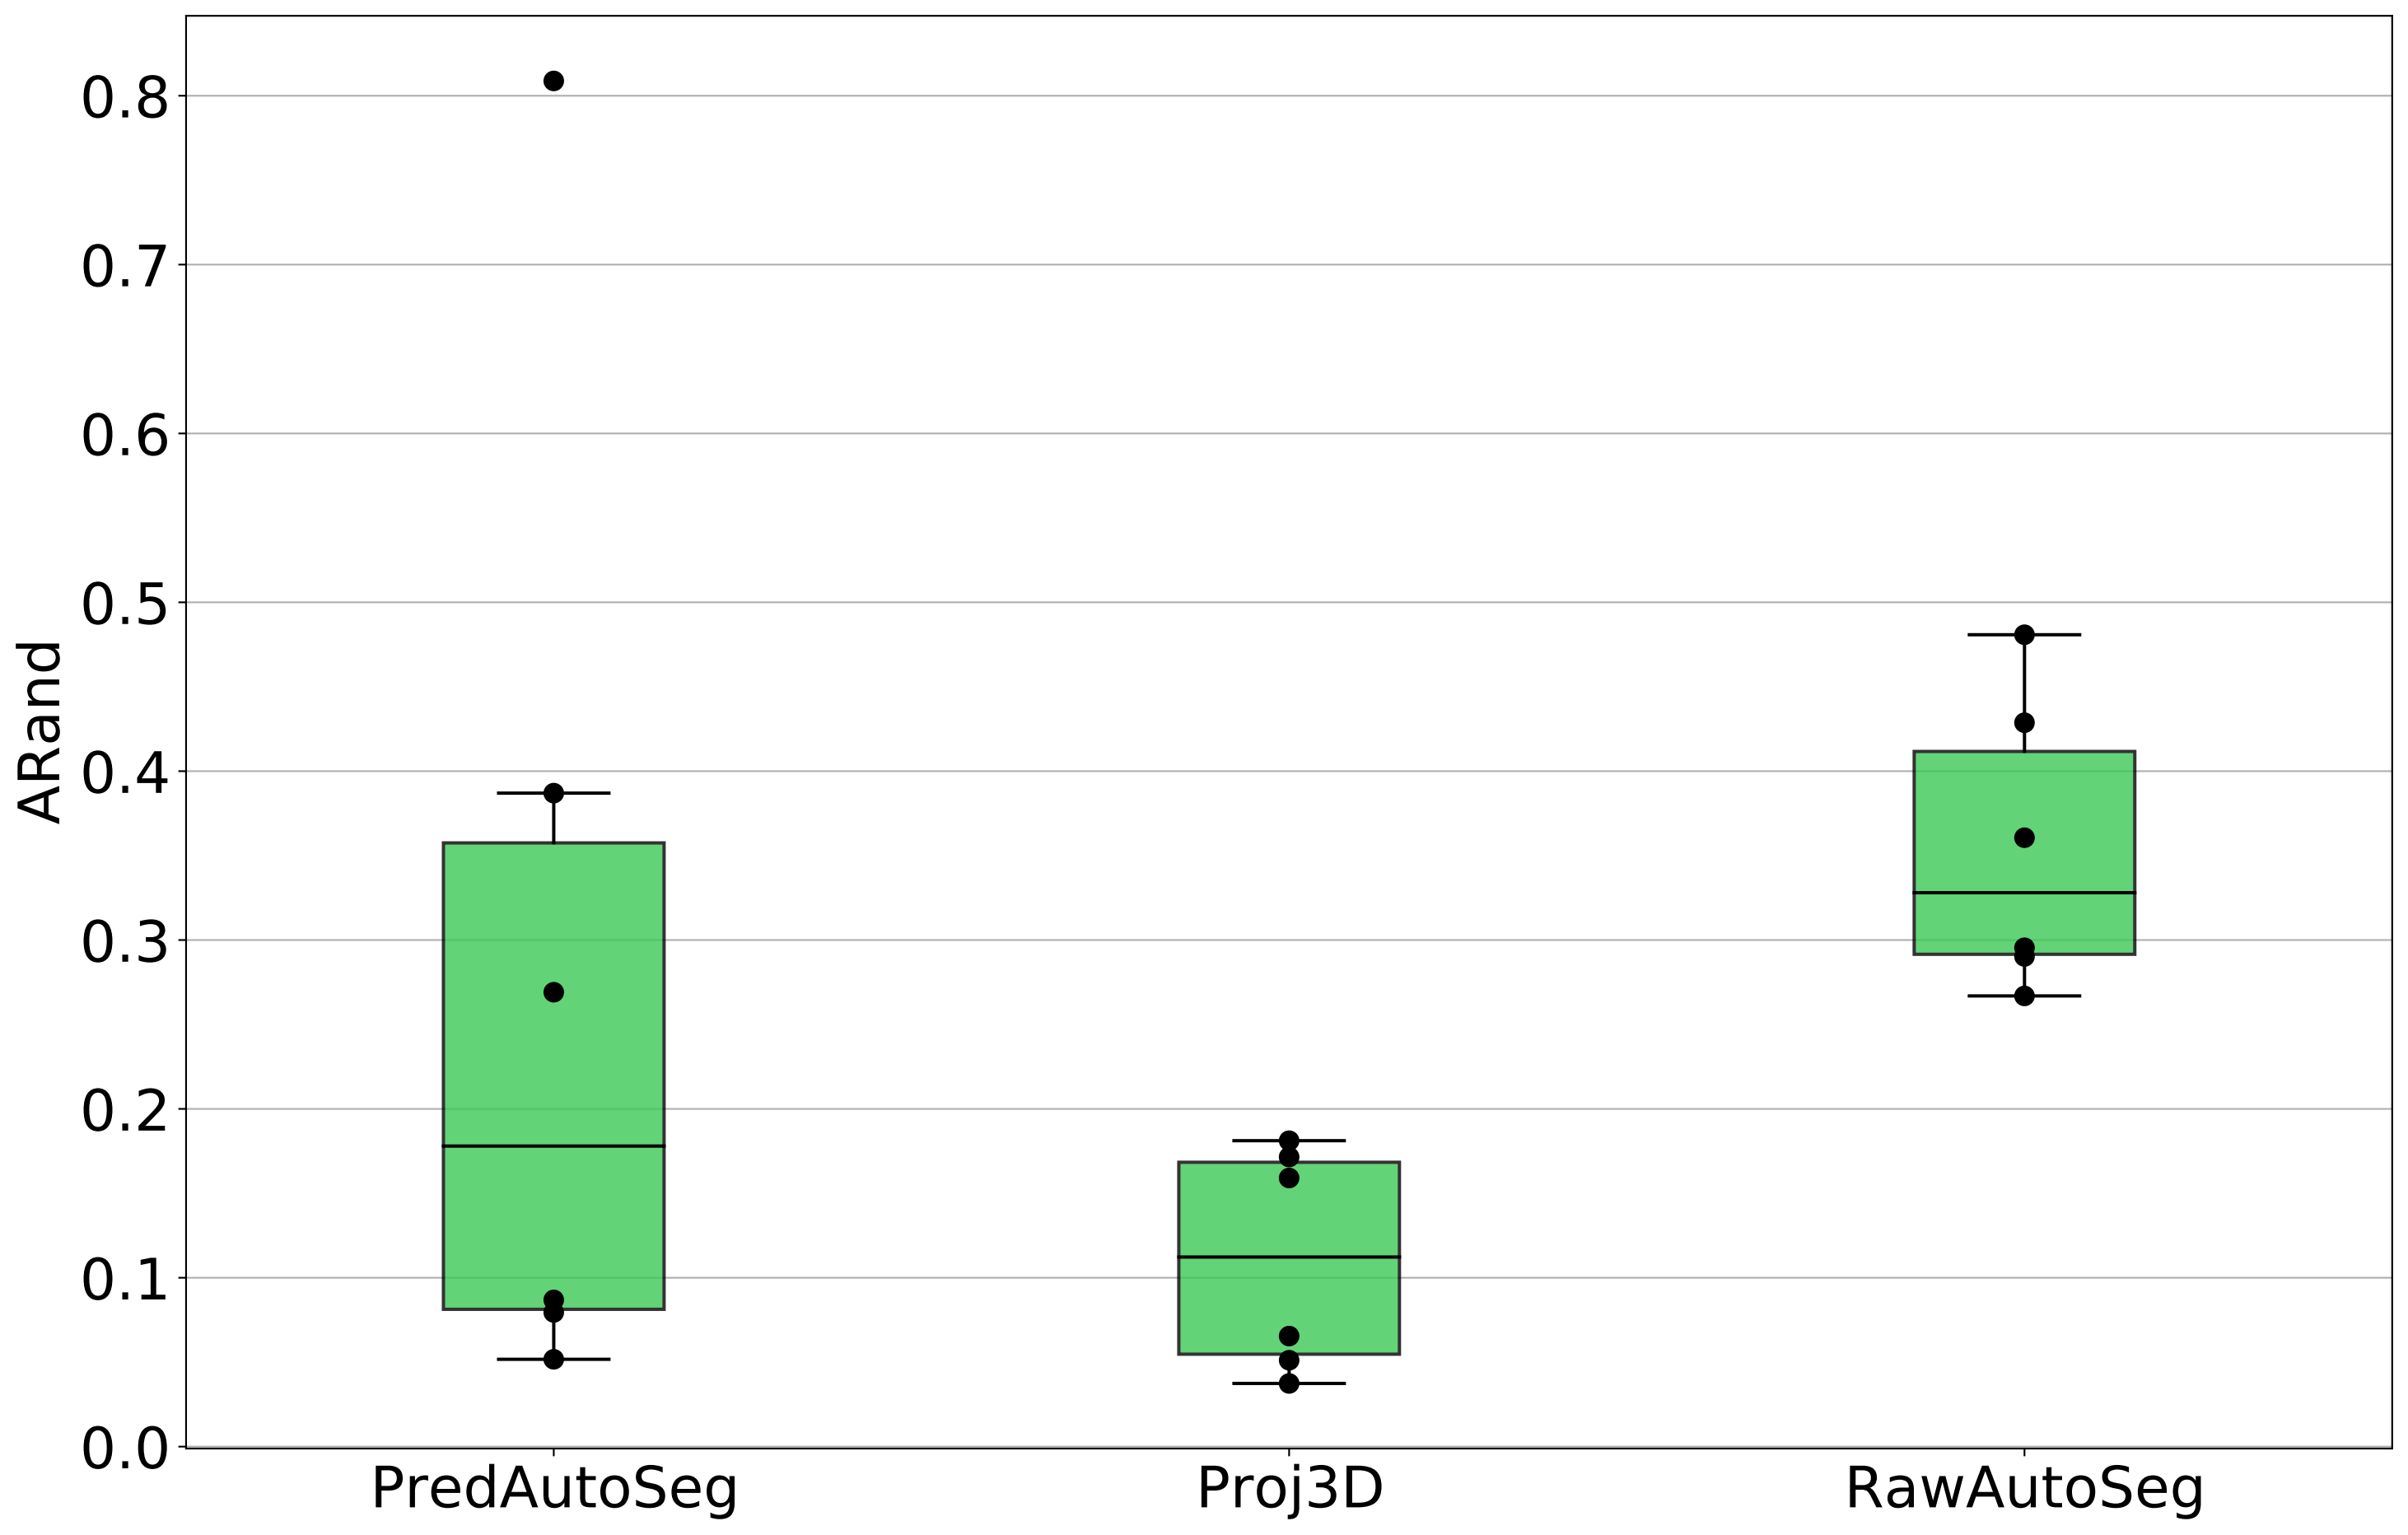

Supplement: fig9-data1 [file elife-57613-fig9-data1-v2.zip]

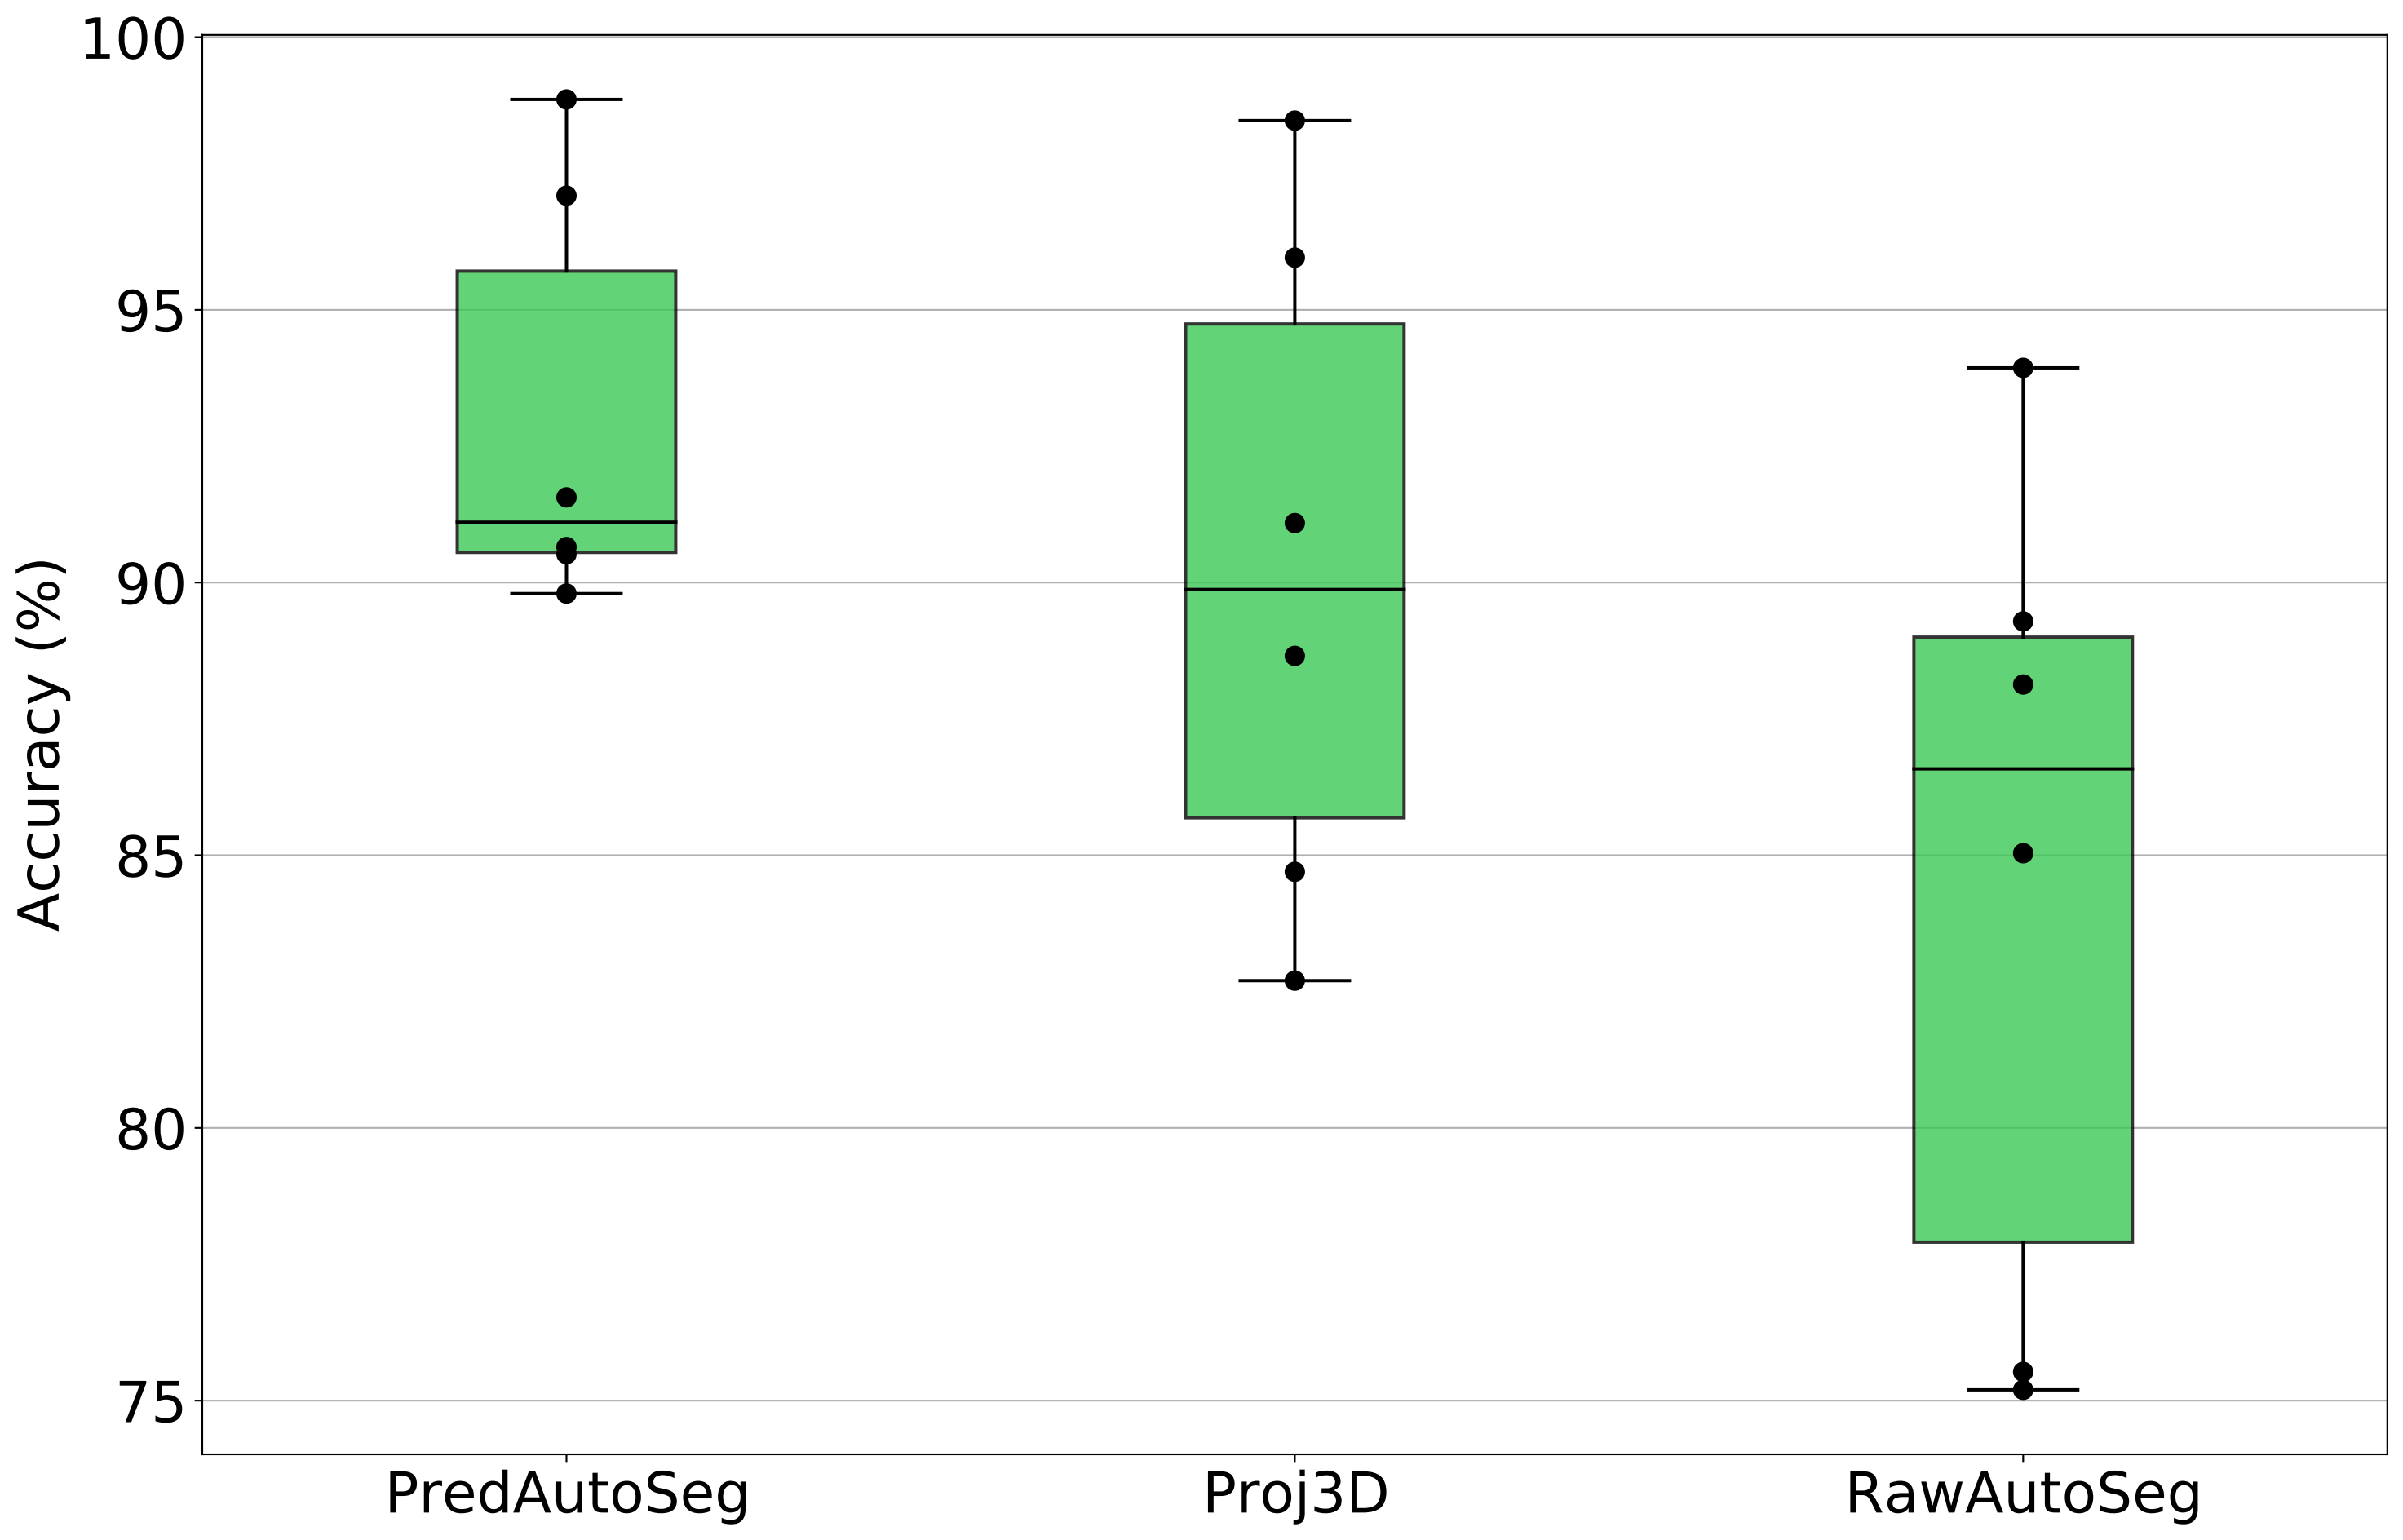

Supplement: fig9-data1 [file elife-57613-fig9-data1-v2.zip]
